# Supplementary material for: Identification of mouse and human embryonic pancreatic cells with adult Procr+ progenitor transcriptomic and epigenomic characteristics
Source: Front Endocrinol (Lausanne). 2025 Feb 13;16:1543960. doi: 10.3389/fendo.2025.1543960 (PMC11864936; doi:10.3389/fendo.2025.1543960)
Supplement: Supplementary file 2 [file Table1.xlsx]

## Sheet: Supplementary Table 1
Supplementary Table 1. Mouse pancreatic islets 10x single-cell RNA-seq clustering using Conos (left table) or Seurat (right table). Cell cluster markers (adj. P-value<0.05) ranked by Average log2 fold change.
	Conos cluster markers										Seurat cluster markers
Marker #	β	α	δ	Acinar	Ductal	Stellate	Endothelial	Immune		Marker #	β	α	δ	Acinar	Ductal	Stellate	Endothelial	Immune
1	C78859	Hhatl	Gm16548	Klk1b24	Sprr2a2	C1s2	Tal1	Ccr1		1	Ins1	Gcg	Sst	Clps	Clu	Gsn	Igfbp7	Cd74
2	Meltf	Fgb	Sst	Reg3g	Gsta1	Ptx3	Dnah2os	Il12b		2	Ins2	Ttr	Rbp4	Ctrb1	Spp1	Dcn	Plvap	Apoe
3	6330403K07Rik	Gcg	Sstr1	Ctrc	Onecut1	Has1	Gm9889	H2.Eb1		3	Iapp	Ppy	Pyy	Cela3b	Krt18	Crip1	Flt1	H2-Aa
4	Nkx6.1	Arx	Ly6h	Reg3b	Ankrd1	Lrrn4	Cyp1a1	H2.Aa		4	Mt1	Pyy	Ppy	Prss2	Dbi	Igfbp6	Esm1	H2-Ab1
5	Pcsk9	Avpr1b	Adcy8	Clps	Mmp7	Duoxa1	Gm11707	Sirpb1c		5	Ero1lb	Pcsk1n	Chgb	Try4	Krt8	Lgals1	Timp3	Ccl4
6	Prss53	Edn3	Ghsr	Ptf1a	X1700011H14Rik	Cpz	Rtp3	Cd207		6	G6pc2	Resp18	Hspb1	Cela2a	Apoe	Mgp	Plpp3	H2-Eb1
7	Hapln4	Pou6f2	Ppp1r17	Gp2	2310057J18Rik	Gjb5	Olfr1396	Arl11		7	Ppp1r1a	Cst3	Resp18	Cela1	Actg1	S100a6	Sparc	Fth1
8	Ucn3	Irx1	Trpa1	Cela3b	Tmem54	Gm9780	Klhl4	Ccl3		8	Scg2	Gnas	Fam159b	2210010C04Rik	Tmsb10	Igfbp5	Igfbp3	Lyz2
9	Fam151a	Serpind1	Bmp3	Gm2663	Aadac	Sfrp4	Robo4	Olfr110		9	Prss53	Gpx3	Auts2	Sycn	Junb	Sparc	Emcn	Tmsb4x
10	St8sia5	Galnt13	F5	Pnliprp1	Syt8	Bnc1	Cdh5	Clec4a3		10	Prlr	Pcsk2	Malat1	Try5	Tmem176b	Slpi	Ifitm3	Cxcl2
11	Mnx1	1700086L19Rik	Kcnd2	Spink1	Gm16551	Scara5	Hoxd8	Ms4a7		11	Cntnap2	Tmem27	Hspa1a	Pnlip	Lurap1l	Ifitm3	Egfl7	C1qb
12	AC078895.1	Pdk4	Grm8	Cabp2	Eps8l3	Rspo1	Plvap	Clec5a		12	Phactr1	Scg5	Rora	Reg1	Cyr61	Vim	Kdr	Ctss
13	Barhl1	Kcnc4	Crhr2	Amy2a2	Pgc	Krt76	Gpihbp1	Cd33		13	Atp2a2	Rpl13	Ubb	Zg16	Cldn3	Tmsb10	Rgcc	Ftl1
14	Gm13031	Fam184b	Cacna1h	Pnliprp2	Gabrp	Tbx18	Myct1	Bcl2a1b		14	Ucn3	Rps3a1	Dnajb1	Ctrc	Anxa5	Timp2	Actb	C1qa
15	Gsdma	Abcc12	4930539E08Rik	Ctrb1	Slc5a8	Dcn	Flt4	Lilr4b		15	Hadh	Rps24	Hspa1b	Cpb1	Try5	Col3a1	B2m	B2m
16	2210019I11Rik	Mctp2	Ptprz1	Rnase1	BC064078	Krtdap	Col13a1	4930430E12Rik		16	Gng12	Malat1	Jun	Pnliprp1	Mgst1	Rarres2	Ly6c1	Tyrobp
17	Mafa	AF529169	Kcnh7	Sycn	Arl14	Osr1	Esm1	Ccl4		17	mt-Nd2	Rpl27a	Asic2	Ctrl	Myl12a	Clec3b	Fabp4	Il1b
18	Ins1	9630001P10Rik	Cacna2d2	Pdia2	3110079O15Rik	Clec3b	Irx3	Sh2d1b1		18	Slc2a2	Rps27a	Gnas	Cpa1	Actb	Igfbp4	Ier3	Ccl5
19	Bace2	Nsg2	Gap43	Cpb1	Gm37350	Dpep1	Adgrl4	Clec4d		19	Sgcz	Rps10	Ly6h	Rnase1	Eef1a1	Mfap5	Ctla2a	Ccl3
20	Gm17767	Irx2	Fstl5	Cckar	2210017I01Rik	Igfbp6	Selp	C1qb		20	Mt2	Rpl35a	Hsp90aa1	Pla2g1b	Atf3	Ly6a	Ly6a	Fcer1g
21	Kcnj12	Serpina1a	Shisa6	Klk1	Apoc1	RP23-16L19.4	Flt1	Klra2		21	Bace2	Rpl11	Meg3	Spink1	Klf6	Igfbp7	Id3	C1qc
22	Fhdc1	Upk3a	Gm32647	Pla2g1b	Wfdc18	Gm765	Aplnr	Fcgr4		22	Papss2	Rpl9	Cd24a	Tff2	Zfp36l1	Fth1	Tm4sf1	Cst3
23	Adra2a	Cacna2d4	Gabrg3	Hamp2	Lce6a	Sfrp2	Clec1a	Chil3		23	Enho	Rpl37a	Zbtb20	Cpa2	S100a11	Tmsb4x	Srgn	Actb
24	Olfr1322	Ttr	Lmo3	Slc39a5	Krt17	Lgals7	Ces2e	4933432I03Rik		24	Mafa	Rpsa	Scg2	Cel	Cldn4	Nbl1	Plpp1	Psap
25	Ins2	Sertm1	Cacng2	Cela2a	S100a14	Upk1b	AC138306.1	Slamf9		25	Chga	Rps23	Fgf14	Klk1	H3f3b	Akr1b3	Tmsb4x	Ctsb
26	Cnnm1	Kcnip3	Dscam	1810007D17Rik	Apcs	Dio2	Fam167b	Ifnb1		26	Manf	Rpl19	Bsg	Pnliprp2	Jund	C3	Hspb1	Cd52
27	Tmprss4	Ctxn2	Kcnc2	Aqp12	Spaca7	Osr2	Mmrn2	Slamf7		27	Trpm5	Xist	Hspa8	Gp2	Ptma	Pi16	Sgk1	Cd14
28	Trpm5	Adarb2	Dpp6	Klk1b4	Epn3	Mfap5	Kdr	Ccl12		28	Ndufs2	Rpl8	Cst3	Reg3b	Bicc1	Serping1	Itm2b	Lgals3
29	Dgkg	Cdh9	Spock3	2210010C04Rik	Muc6	Fmod	Inhbb	Evi2b		29	Cox6a2	Rpl30	Hsp90ab1	Nupr1	Ier2	Serpinh1	Actg1	Srgn
30	Gad1	Pou3f4	Cbln4	Cela1	Gm14133	Ogn	Clec14a	Siglech		30	Pcsk1	Pde4d	Hspe1	Reg2	Rps19	Csrp2	Col4a1	Rps11
31	Angptl7	Wnk3	4930509J09Rik	Try5	Obp2b	Fgf10	Sox7	Igsf6		31		Rps15a	Actg1	Amy1	Ambp	Rpl23a	Calm1	Rpl18a
32	Tmem215	Fam46d	Nhs	Cuzd1	A230001M10Rik	Dlx4os	Gm11730	Mpeg1		32		Rps18	Fgf12	Try10	Anxa2	Ifi27l2a	Eng	Cyba
33	Cox6a2	4732419C18Rik	C230004F18Rik	Reg1	Ppp1r1b	Mrgprf	Gm4632	Cybb		33		Rps7	Fam155a	Dmbt1	Rpl18a	Rgs5	H2-D1	Fau
34	Aldh1l2	Mgat4c	Adcy2	Amy1	Slc34a2	Foxd3	Igfbp3	C1qc		34		Rpl26	Nrg1	Mt1	Gas6	Rps8	Ifitm2	H2-D1
35	Galr1	Lama2	Tmem200a	Ggt1	Tacstd2	Dpt	Enpp6	H2-Eb1		35		Rpl34	Epcam	Mt2	Hes1	Gm8730	Clic4	Rps29
36	Gm11789	Adrb1	Trpc5	Cel	Wnt7a	Fam180a	Gata2	Trim30c		36		Rpl23	Tspan8	Pdia2	Rps18	Apoe	Nrp1	Pfn1
37	Map3k19	Gm20554	Tox2	Amy2a3	Elf5	Col1a1	Sox18	Ctss		37		Rps13	Stxbp5l	Cuzd1	Tmem45a	B2m	Cd81	Bcl2a1b
38	Cntfr	Mamld1	Neurog3	Prss2	D630011A20Rik	Kcna1	Car4	Ngp		38		Rpl14	Dpp6	Psmb10	Rpl13a	Id3	Cdkn1a	H3f3b
39	9230117E06Rik	Kcnd3	Syt1	Ctrl	Gkn3	Chst4	5033426O07Rik	Clec4n		39		Itm2b	Rps3a1	Clu	Tagln2	Rpl13a	Ptma	Rps9
40	Pcsk1	Ndst4	Ncam2	Try10	Wnt7b	Svep1	Cd300lg	Spi1		40		Rps4x	Rps4x	Ppy	Ier3	S100a11	Pecam1	Cxcl10
41	Gabbr2	Astn2	Clmp	Zg16	Sds	Hoxc5	Tie1	Tlr7		41		Rps20	Arg1	Rplp1	Gm8730	Rps27	Nfkbia	Rgs1
42	Nkx6-1	Ugt8a	Csmd3	Gm10334	Anxa13	Cyp2c44	Emcn	Ly86		42		Rps16	Kcnmb2	Erp27	Egr1	Col1a2	Tsc22d1	Wfdc17
43	Rims3	Rab3c	Syt6	Cpa1	Krt23	Upk3b	Gm20532	H2.Ab1		43		Aplp1	Jund	Prss3	Rps5	Eef1a1	Junb	Prdx1
44	Gcgr	Eef1a2	Cpne7	Try4	1700029F12Rik	Duox1	Gipc3	Slfn1		44		Rpl37	Pam	Gm42418	Rpl23a	Ifitm2	Tcf4	Rps19
45	Mt3	Igsf21	Slc16a7	Erp27	Sprr1a	RP23-351K21.1	S1pr1	Gm48065		45		Rplp1	Rps27a	Rpl41	Rps8	Rps19	Thbs1	Sh3bgrl3
46	Rprml	Rnf212b	Clvs1	Serpini2	Gm16136	Ndst3	Unc45b	Cebpe		46		Meg3	Trpm3	Lcmt1	Sox4	S100a10	Ramp3	Rpl32
47	Fkbp1b	Vwde	Efnb3	Pnlip	Ptgfr	Has2	Icam2	Cd177		47		Hs6st3	Xist	Aqp12	Sox9	Rpl18a	Rbp7	Crip1
48	Papss2	Higd1a	Mest	Tff2	Pof1b	C1rb	Pecam1	Cd74		48		Rpl7	Rpl10	Rpl32	Krt19	Laptm4a	Col4a2	Nfkbia
49	Mfsd2a	Sstr2	Ccdc60	Klk1b11	Igfbpl1	Figf	Olfr56	Lilra5		49		Rps14	Rpl9	Ggh	Cp	Acta2	Cdh5	Rps5
50	Spock2	Dnah11	Gm20754	Cela3a	Gm15318	Apol7a	Sox17	H2-Aa		50		Rpl15	Calm2	Serpini2	Nupr1	Rps15	Esam	Rps4x
51	Hcn4	Slc38a5	Fam159a	Klk1b3	Tmem45a	Islr	Arhgef15	Gm13391		51		Rps29	Pcsk1n	Tmed6	Cd24a	Rps5	Rhoc	Rps16
52	Stk26	Lrrtm3	CT025619.1	Cpa2	Slc39a4	Hand1	Fgd5	Cd86		52		Rps17	Hmgn3	Msrb1	Tmem176a	Rplp1	Id1	Rps8
53	G6pc2	Gm648	Ankrd34b	Rbpjl	Crp	Col3a1	She	F630028O10Rik		53		Cryba2	Rpl30	Gatm	Gnb2l1	Aebp1	Sptbn1	Arpc1b
54	Slc6a19	Sytl2	Creg2	Reg3d	Gm5546	Nkain4	Slfn3	Gm10552		54		Rpl18	Bex2	Hamp2	Rps14	Rpl35	Myl6	Npc2
55	Ero1lb	Scin	Zfp804a	Slc38a3	Slc25a48	Fbln1	Cyyr1	Camp		55		Rpl41	Dnaja1	Gamt	Epcam	Myl6	Ppia	Eef1a1
56	Emilin1	Gm15261	Rtl4	Tmed11	Ptgds	Tmem100	Ctla2a	Clec4a2		56		Rps21	Meis2	Rps27l	Nfkbia	Rpl13	Msn	Rpl23
57	Ntrk2	Pcdh8	Tmie	Prss3	Vtcn1	Mmp2	Grrp1	Cd209a		57		Rpl32	Itm2b	Uqcrq	Atp1b1	Upk3b	Tpt1	Ctsz
58	Cib3	BC048546	Kcnj13	Reg2	Xirp2	Dmrt2	Btnl9	Plbd1		58		Rplp2	Cacnb2	Amy2a2	Ptp4a1	Ccl2	Gpihbp1	Rplp0
59	Sytl4	Pappa2	Tagln3	Aqp8	Pah	Smoc2	Sema7a	Ccr5		59		Robo2	Gpx3	Reep5	Sdc4	Cd81	Ly6e	Rpl23a
60	Scrt1	Cldn11	Gm45623	Reg3a	Slc5a1	Ebf2	Arap3	Nlrp1b		60		Rpl17	Rpl35a	Rpl18a	Eno1	Gstm1	Dusp1	Rps23
61	Gm30074	Pgm5	Ngb	Itih4	2700046A07Rik	Ptgis	Rbp7	Rgs1		61		Rpl6	Ubc	Fkbp11	Rps9	Rps4x	Ehd4	Rplp1
62	Slc2a2	Ppp2r2b	A830011K09Rik	Klk1b5	Ggt6	Lum	Pcdh12	Il1a		62		Rps2	H3f3b	Ppib	S100a10	Bst2	Mgll	Rps14
63	Aqp4	Aard	Rgs22	Npw	Ces1c	Cd248	Eng	Adgre1		63		Pappa2	Pde4d	Rpl38	Lcn2	Col1a1	Apold1	Vim
64	Ppp1r1a	Samd5	Ache	1810028F09Rik	1700011H14Rik	Wt1os	Pkn3	Tlr8		64		Rps12	Rpl21	Tmem97	Sprr1a	Gm12840	AW112010	Rps18
65	Gm26812	Mafb	Oit1	Amy2a5	D930028M14Rik	Hoxc4	Fabp4	Clec4e		65		Rpl38	Abcc8	Gm10334	S100a6	Rpl4	Slc9a3r2	Laptm5
66	Gpr158	Ace2	Fat3	Fgf21	Chrm1	Vit	Rasip1	Cd300ld		66		Rplp0	Hs6st3	Serp1	Rps27	H2-D1	Mgp	Cd83
67	Eef1akmt3	Drc1	Zfhx4	Gm5771	Chdh	Gsc	Tmem204	Pld4		67		Etv1	Rps9	Lgals1	Tnfrsf12a	Gm13889	App	Ms4a7
68	Prlr	Nxph1	Erich5	Amy2a4	Ovol1	Crb2	4833403J16Rik	H2-Ab1		68		Rps3	Bex3	Rpl35	Fxyd3	Rps23	Akap12	Rpl17
69	Vwa5b1	Col26a1	Cacna2d3	Gm13010	Sox9	Aebp1	Cldn5	Mmp12		69		Rpl13a	Rpl13	Rpl36	Mfge8	Anxa2	Eef1a1	Rpl39
70	2410021H03Rik	Itih2	Khdrbs2	Gal	Gm15635	Fndc1	Egfl7	Cd48		70		Higd1a	Rps3	Gcat	Zfp36	Rps6	Adgrl4	Hexb
71	Th	Egflam	Grid2	Tsga10ip	Cyp4f14	Penk	Kif26a	Lair1		71		Ptprn2	Isl1	Rps8	Fos	Rps14	H3f3b	Rplp2
72	Gm30239	Slc27a2	Luzp2	Dmbt1	Klhdc7a	Fam150b	Ptprb	Mmp25		72		Mafb	Spint2	Rpl13a	Rpl17	Rps29	Hsp90ab1	H2-DMa
73	Galnt9	Sema4f	Cidea	4930415O20Rik	Gjb1	Mfap4	Exoc3l2	Iglc3		73		Rpl10	Selenom	Cabp2	Cldn7	Rps11	Ednrb	Rps27
74	Adora1	Adamts18	Dlk1	P2rx1	Plin5	Pdgfra	Gm32401	C5ar1		74		Rpl22l1	Syt1	Gstp1	Apoc1	Rpl14	Ubc	Rps7
75	Gm33447	Cit	Pknox2	Atp2c2	Cdhr5	Pi16	Gimap4	Ms4a6c		75		Spint2	Tmem27	P4hb	Anxa3	Cald1	Crip2	Fxyd5
76	Ffar1	Gfra3	Mdga2	Gamt	Slc45a3	Slitrk4	4930554G24Rik	C5ar2		76		Rps9	Rpl22l1	Reg3d	Rhob	Rpl10	S1pr1	Rps15a
77	Gpr45	Cecr2	Kcnj4	Col7a1	Pvrl4	Krt13	Gm48089	Rnase2a		77		Rpl10a	Rpl11	Ifitm3	Rps16	Sepw1	Ptprb	Rpl13
78	Tmigd3	Gabrb1	Hgf	1810064F22Rik	Wfdc15b	Fst	Adcy4	Lyz2		78		Slc7a2	Btg2		Ankrd1	Rps9	Epas1	Gpx1
79	2200002J24Rik	Fam13a	2600014E21Rik	Padi2	Scx	Dlx4	Ramp3	Gm6377		79		Rps19	Eif1		Rpl4	Rpl36a	Gnai2	Rpl35
80	4933428C19Rik	Lrtm2	Cpne4	Gjb2	Apol10a	Slpi	Cd93	Bcl2a1a		80		Dbpht2	Fxyd6		Pnrc1	Actb	Serinc3	Lgmn
81	Gm30173	Klb	Arg1	Bdh2	Veph1	Vgll3	Hoxd3os1	Ms4a6d		81		Rps5	Rpl3		Dusp1	Rpl17	Cd93	Rpl3
82	Npy	C8b	Hhex	Nupr1	Mybpc2	Qprt	Ushbp1	Bcl2a1d		82		Eef1b2	Naca		Tstd1	Emp3	Ybx1	Rpl10a
83	Lmo1	Kcnk3	Dtna	Tead2	Tstd1	Wt1	Kcne3	Tnip3		83		Fau	Rpl27a		Rpl14	Cav1	Ier2	Rps12
84	Gpr62	2310001H17Rik	Sftpd	Fam195a	X9130008F23Rik	Tnfaip6	Smad6	Mmp8		84		Tpt1	Rpl24		Rpl10a	Prss23	Anxa2	Ctsh
85	Nefh	Serpina1d	Unc5d	Aldh1l1	Cyp2j5	Zcchc5	Gm4070	Msr1		85		Rpl21	Rps10		Chka	Igf1	H2-K1	Mmp12
86	Slc35f4	Nrxn3	AW551984	Sostdc1	Cp	Gm2564	Jcad	Cd200r4		86		Dnajb1	Ptprn2		Crip2	Gas6	Sparcl1	Rps24
87	Gm4791	Cacng4	1810006J02Rik	Hsd17b13	Slc10a2	Fam131b	Apln	Cd300c2		87		Rpl23a	Unc5c		Tm4sf4	Cd34	Rpl18a	Rps6
88	Car10	Kcnj3	Chst8	Cml1	Hkdc1	Fbn1	Ssu2	Ighm		88		Rps27	Itpr1		Jun	Myl9	Bcr	Aif1
89	Crybb3	Sv2b	Nptx2	Vtn	Foxa1	Hoxc8	Clca3a1	I830077J02Rik		89		Atf3	Tshz2		Wfdc18	Rpl32	Myl12a	Rps20
90	Ffar3	1700001C02Rik	Ntm	Cth	Hao2	Wnt6	Rgcc	Evi2a		90		Rpl31	Chchd2		Tff2	Rps12	Stc1	Rps3
91	Kcnh1	Sorcs1	Gm14964	Matn4	Wfdc2	RP23-34O23.4	AU021092	Abcg3		91		Tmsb4x	Pfdn5		F3	Rps16	Eif1	Rpl35a
92	Rad51ap2	3930402G23Rik	Fam196b	Homer2	Mrgprb2	Htra3	Mgll	Havcr2		92		Tmsb15b2	Nenf		Cdh1	Rplp0	Gimap6	Ctsd
93	Bhlha15	Gm29595	Fam159b	Tmed6	Grhl2	Cadm3	Bdkrb2	Pyhin1		93		Rpl24	Dscam		Rps23	Tagln	Hbegf	Rps28
94	Lgals12	Reep1	Kcna5	Tmem97	Lrrc26	Tnxb	Mall	Plcb2		94		Cpe	Rps13		Rps15	Rpl3	Podxl	Rps25
95	Nup93	Cryba2	Gm11417	Adm2	Mme	Dmkn	Piezo2	Pilrb2		95		Rpl36	Kcnb2		Rpl3	Fbn1	Arpc3	Hspa8
96	Pde5a	Gpx3	Lrrc9	Sardh	Fgfr3	Adgrb2	Nod2	S100a8		96		Rpl28	Rpl19		Csrp1	Rps18	Gm13889	H2-DMb1
97	Derl3	Sfrp5	Gpm6a	Metrn	Ly6g6e	Rarres2	Dysf	C3ar1		97		Eef1a1	Kctd8		Nfib	Fxyd1	Clic1	Hmox1
98	Gm27033	Rbfox1	Scn3b	Gnmt	Gm20649	1810065E05Rik	Podxl	Wfdc21		98		Ptprd	Rps24		Rpl10	Tuba1b	Crip1	Coro1a
99	Gm19461	Ttbk1	Kirrel3	Gjb1	Ces1d	Col6a2	Plpp1	Cd180		99		Lpl	Pcdh15		Cryab	Tppp3	Cd24a	Basp1
100	Gm28905	Nudt11	Gm31373	Arhgdig	RP24-136L4.2	Ccl19	Ctla2b	A530064D06Rik		100		Npc2	Ddx5		Rpl23	Rpl10a	Rps19	Tmsb10
101	Kcnh5	Gria2	Lrfn5	Crlf1	Trim50	Angpt4	F2rl3	1810011H11Rik		101		Pam	Rpl8		Kifc3	Rps25	Sat1	Try5
102	Zdhhc22	Tmsb15b1	Rbp4	Abhd11os	Scara3	Fgf5	Nid2	Ear2		102		Cpq	Rps20		Rps6	Rpl41	Rgs5	Cotl1
103	Gm27168	Klhl13	Asic2	Gm15915	Ell3	Gas1	Tmem252	Mgl2		103		Rps15	Hhex		Krt17	Rpl37a	Gm42418	Rpl21
104	Vstm2l	Thsd7a	Gm4117	Psmb10	Ccdc64b	Tcf21	Sost	Ptafr		104		Rps25	Folr1		Gm10260	Rps26	Arpc1b	Rpl13a
105	Gucy2c	Dbpht2	Caly	Muc1	Slc28a3	Fgf16	Pcdh17	Ifitm6		105		Rpl29	Ocrl		Clic1	Cxcl1	Fkbp1a	Cxcl16
106	Adam32	Npb	Nespas	Serpinb1a	X2810459M11Rik	Akr1c18	Ccm2l	H2-M2		106		Rpl18a	Rps15a		Myl12b	Rpl37	Dlc1	Gm8730
107	Gjd2	Hcar1	Rims1	Lcmt1	Cftr	Il33	Sema3g	Cass4		107		Atp5e	Etv1		Rps3	Efemp1	Tpm3	Rps15
108	Igfals	Tmsb15b2	Tcea3	Lamb3	Sh2d4a	Scn7a	Adamtsl2	S100a9		108		Fos	Hsph1		Cd9	Gas1	Vim	Rpl10
109	Sgcz	Grik2	Lingo1	Gcat	Dntt	Gm17455	Cacng1	Ms4a4c		109		Ssr4	Gm20754		Rpl7	Ebf1	Mmrn2	Rps27a
110	Asb11	Prdm5	Fgf14	Dhx34	Nfe2l3	Serpinf1	Gm32688	Tyrobp		110		Rpl5	Adgrb3		Atp1a1	Ftl1	Cdc42ep3	Tnf
111	Pcx	Stk33	Nkain3	Bcat2	Ajuba	Plac9b	Dchs1	Fcgr1		111		Rps28	Sntg1		Ly6e	Fstl1	Hilpda	Ctsc
112	Grin1	Gm44210	Vcan	Gatm	Oprk1	Barx1	Hoxa1	Itgax		112		Bsg	Kcnd2		Fth1	Dpt	Adgrf5	Rps26
113	Pdx1	Arhgap6	Sox11	Ggh	Serpinb5	Thy1	Zfp366	Lilrb4a		113		Gria2	Sez6l		Cd14	Rps15a	Tpm4	Rpl37
114	Kcnab3	Slc41a2	Pcdh9	Msrb1	Lrrc75b	Fgfbp1	Plscr2	Ciita		114		Ndst4	Sumo2		Scara3	Dynll1	Atox1	Rpl26
115	Muc4	Tmsb15l	Dlgap2	Mia	Tmem171	Podn	Tmem255b	AF251705		115		Itpr1	Rpl6		Eef2	Rpl6	Rasip1	Tpt1
116	Tubb3	4732463B04Rik	Rasgef1a	Urah	Dpysl4	Ccdc80	St6galnac3	Nlrp3		116		Naca	Rpl15		Cd81	Rps17	Cd300lg	Btg1
117	Hadh	Dpp10	Cpne5	Slc6a9	Paqr5	Ccl11	Hoxd9	Fcgr3		117		Sfrp5	Rpl18		B2m	Rpl21	Ramp2	Rpl37a
118	5730559C18Rik	Rasgrf2	Cdhr2	Chst2	Ttpa	Prss12	Hey1	Laptm5		118		Atp5g2	Tox		Rps17	Rpl31	Ctnnb1	Rpl6
119	Rnf182	Etv1	Dgkb	Tcea3	Calr4	Gm26873	Gimap6	Slamf8		119		Rpl36a	Cdh2		Rps29	Fn1	Cd200	Cybb
120	Gm5860	Fsd1	Ppp1r14c	Hpn	Klrg2	Pcolce	Foxf1	Ccr7		120		Ubb	Rps7		Hhex	Timp3	Col13a1	Rpl14
121	Gm10734	Osbp2	Grem2	Cldn10	E130012A19Rik	Pcolce2	Angpt2	Mmp13		121		Hspa1a	Egr1		Plet1	Prkcdbp	Pde4b	Rps13
122	Ovol2	Mapk4	Rbfox3	Igfals	BC025446	Folh1	Bvht	Timd4		122		Pfdn5	Rpl26		Tmbim6	Rps3	Tcim	Ccl6
123	Akain1	Cfi	Nebl	Tmigd3	Ccl20	Ms4a4d	Ldb2	Lyz1		123		Hist3h2ba	Oaz1		Hbegf	Arpc1b	Adamts1	Rpl28
124	Fam83g	Gm34225	March11	Tmem215	Aim1	Adamts2	Col15a1	Pirb		124		Rpl3	Capsl		Npm1	Rpl23	Gapdh	H2afz
125	Plut	Rorb	Fam83f	Rnf182	Akr1c20	Lox	Lrrc32	Klra9		125		Rps26			F11r	Gm10709	Gng11	Rpl12
126	Hist1h4h	Gfra1	Dach2	Jakmip1	Adam33	Chrdl1	Rai14	Ccl5		126		Rbp4			Myl6	Krt19	Inhbb	Rpl22
127	C030029H02Rik	2610035D17Rik	Cfap61	Ica1l	Slc9a4	Rspo2	Sema3f	Il1b		127		Slc30a8			Gpx4	Rplp2	Rhob	Rsad2
128	AC121960.2	Ppy	Olfm3	Sytl4	Gsta2	Hand2	Npr3	Ccl9		128		Tmed3			St3gal4	Htra3	Serpine1	Cd81
129	Bmpr1b	Oxtr	Add2	Slco1a6	X5730559C18Rik	Cxcl13	Stmn2	Aif1		129		Rpl7a			Pfn1	Ahnak	Ldha	Lgals1
130	Dlgap1	Cap2	Cd24a	Cox6a2	Gm43242	Krt14	Rasgrp3	Gpr65		130		Dpp10			Rpl22	Rps7	Cd34	Isg15
131	Zc3h3	Pvt1	Tspan8	Fkbp1b	Slc9a2	Gm11627	Thrsp	Clec4b1		131		Auts2			Efhd2	Bgn	Rps11	Gapdh
132	Klhdc8a	A1cf	Zfp521	Cntnap2	Gjb3	Rarres1	Gm48727	Tlr13		132		Nrg1			Pabpc1	Anxa1	Sox4	Rpl34
133	Slco1a6	Gria3	Slc38a11	AL589670.4	X2200002D01Rik	Gm8773	Pik3r6	Klrb1b		133		Rpl35			Cox4i1	Tpm2	Txn1	Dusp1
134	5033421B08Rik	Srgap3	Il17rd	Mphosph9	Sctr	Sox10	Tnfrsf10b	Ly6g		134		Dlg2			Rpl37	Ctsl	Rbms1	Arpc2
135	Spsb4	Neto2	Gk	Echdc2	Foxq1	Col6a1	Tmem88	Retnla		135		Atp5l			Actn4	Rpl39	Oaz2	Rpl7
136	Iapp	Elavl2	Cldn9	Iapp	Cdh3	Myocd	Gnat1	Hck		136		Cox7c			Rpl32	Axl	Ltbp4	Ucp2
137	Gm20400	Dlg2	Tekt4	Col6a6	Muc1	Col1a2	Gpr4	Spn		137		Rnf130			Hmgn1	Nkain4	Slc43a3	Rpsa
138	Pdyn	Mkx	Unc5c	0610010F05Rik	Ceacam20	Col5a1	Hecw2	Slc36a3os		138		Gm8797			Rpl6	Junb	Dynll1	Atox1
139	T2	Tnfaip8l3	Kctd8	Insrr	Habp2	Pcnxl2	Plpp3	Selplg		139		Hint1			Dcdc2a	Lgals7	Pomp	Ifitm3
140	Sqle	Dynlrb2	Ehf	Gtf3c4	Alb	Hsd11b1	Slc43a3	Xcr1		140		Gls			Rps11	Pfn1	Malat1	Zfp36
141	Mt1	Ccdc88c	Slc4a4	Ush2a	Fgfr4	Col14a1	Mcam	Fcrls		141		Alcam			Rplp2	Ndufa4l2	Ets1	Rpl4
142	St8sia1	Ptprd	Nsg1	Fahd2a	Asz1	Col5a2	Nrp1	Gm15987		142		Rps6			Rpl7a	Rps2	Tgfb1	Ly86
143	Sdk2	Fev	Stxbp5l	Fam210b	A730098A19Rik	Il11	Tril	Tnf		143		Rpl27			Ddah2	Eef2	Rac1	Lcp1
144	S100z	Prkg1	Scn2a	Mtmr9	Fermt1	Acta2	Ecscr	Ccl6		144		Fam155a			Actn1	Plpp3	Rsad2	Rpl36a
145	Rasgrf1	Mfap2	Col25a1	Abca5	Aldh1a7	Cd7	Shank3	Mrgpra2b		145		Cacnb2			Rpl36a	Ier3	Mef2c	H2-K1
146	Enho	Gm45159	Cd164l2	Cib3	Stra6l	Csmd1	Gimap5	Scimp		146		Rpl39			Rplp0	Ly6c1	Fermt2	Pim1
147	Cdhr1	Dmd	Nrxn2	Gm27033	Kcnn4	Srpx	Scarf1	Ltf		147		1700086L19Rik			Ppia	Cryab	Rps8	Rpl27a
148	Gp5	Gm4128	Lrfn2	Atp13a1	Cyp4f15	Actg2	Hoxd4	Gpnmb		148		Jun			App	Rpl28	Cyyr1	Bst2
149	Elovl4	Edil3	Gpr179	Trpm5	Pvrl2	Gxylt2	Lepr	Pla2g7		149		Itm2c			Dsg2	Pcolce	Arpc2	Sat1
150	Lrrc10b	Syt16	Dnah2	Dlgap1	Fam198a	Lmod1	Arhgap31	Ms4a8a		150		Nxph1			Rpl35	Ptrf	Myct1	Bcl2a1d
151	Gnat2	Pik3c2g	Igdcc4	Il1r1	4921506M07Rik	6330403A02Rik	Nrarp	Osm		151		Rpl4			Fxyd1	Nid1	Plk2	Rpl19
152	Crb1	Kctd16	Pou3f1	Mrps14	Ntf5	Gfra2	Calcrl	Cd52		152		Rpl12			Rpl31	Gnb2l1	Mfge8	Zeb2
153	Atf5	Hist3h2ba	Rgs20	Ins2	Spp1	D630033O11Rik	Cytl1	Ear1		153		Lgals3bp			Anxa4	Klf2	Aplp2	Ifi27l2a
154	Nmnat2	Lrrtm1	Sfxn5	Gm30648	RP23-435E16.1	Gli1	Cavin2	Clec12a		154		Mast4			Rps26	Rpl7	Arhgap31	Cd68
155	Xrcc3	Kcnq2	Ppfia2	Dmac1	Efna4	Faim2	Endou	Mefv		155		Rack1			Ybx1	Myl12a	Serpinh1	Rps2
156	Slc35d3	Calb1	Styk1	Adam32	Lamb3	Efemp1	Ly6c1	Cd53		156					Sncg	Dbi	Klf2	Rpl11
157	Adh1	Arnt2	Fjx1	Gpr158	Plekhs1	C1s1	Thsd1	H2-DMb1		157					Tpt1	Fbln1	Anxa3	Rpl18
158	Kcnip2	Wipf3	Gm10851	Spc25	Gm5420	Cdh19	Gm30382	Il10		158					Flna	Lum	Laptm4a	Hspa1a
159	C2cd4a	Pde4d	Bmp6	Robo1	Scgb1c1	Twist2	Chst2	Gm34084		159					Rpl13	Rnase4	Acvrl1	Rgs10
160	Entpd3	Ntn4	Gpa33	D630024D03Rik	Slc6a14	Rergl	Snai1	Wfdc17		160					Gm10709	Ogn	Cald1	Ybx1
161	Chrm3	Corin	Rgs9	Vamp7	Clic3	Arsi	Erg	5031425F14Rik		161					Cyba	Rpl24	Ecscr	Ppia
162	Cad	Fbp1	Tro	Hs3st6	Fzd9	Abca8a	Chrm2	Cd72		162					Mt2	Rpl26	Hspa8	Tmem176a
163	Ggt7	Sdk1	Rmst	Cryzl2	X6030419C18Rik	Lrrn4cl	Sh3tc1	Il10ra		163					Rpl21	Gm10260	Apbb2	Tmem176b
164	Gm41177	Dock11	Gm609	Prkar2b	Erich2os	Kcna6	Gm38399	Coro1a		164					Ces1d	Rpl36	Rpl23	Rpl24
165	Tmprss2	Peg10	Klhdc8b	Ublcp1	Adam30	Kcne4	Fli1	Pilrb1		165					H2-D1	Tuba1a	Fxyd5	Rps3a1
166	Gng12	Slc7a2	Cntn3	Akr1c13	BC021891	Cygb	Tgtp2	Olfr111		166					Ezr	Ugdh	Rps14	Ppp1r15a
167	Ica1l	Grb10	Chst9	1300002E11Rik	Clic6	1600015I10Rik	Dll4	Sla		167					Tubb5	Ybx1	Klf7	Rpl36
168	Cdh7	Efcc1	Cntnap5b	Tmem205	Gsta3	Nkd1	Slfn5	Nckap1l		168					Tmsb4x	Ldha	Prdx1	Rps10
169	Cntn1	4930452B06Rik	Mef2c	Pitpnm3	Nr0b2	Igfbp5	Plxnd1	Treml4		169					Rps7	Rpl35a	Cavin3	Tgfbi
170	Gm34759	Gm42372	Pcdh15	5830454E08Rik	Clca3a2	Isx	Col4a2	Ccl22		170					Hsp90ab1	Gapdh	Cfl1	Rpl8
171	Hist1h4j	Anks1b	Hunk	Snph	Sbspon	Wisp2	Prex2	H2-Oa		171					Rps4x	Rpl34	Rnd1	Ptma
172	Rab3d	Rab38	Nyap1	Enho	Mgst1	Omd	Lbx2	Jchain		172					Sepw1	Itm2b	Zfp36l1	Ccrl2
173	AL589670.4	Fgl1	Folr1	T2	Clcf1	Nnmt	Chst1	Csf3r		173					Cd44	Rps28	Rps16	Actg1
174	Gm6999	Bcl2	Fabp5	Fam134b	Mpzl2	Sult5a1	Tlx1	Milr1		174					Serbp1	Klf4	Sqstm1	Arpc3
175	Prr29	Cobl	Snca	Vstm2l	Shmt1	Steap3	Tbxa2r	Pilra		175					Rpl5	Anxa3	Cyr61	Unc93b1
176	Kdm2b	Slc25a33	Arhgap36	Ppp6r2	A530016L24Rik	S1pr3	4930578C19Rik	Ms4a6b		176					Cxcl16	Crip2	Atf4	Csf1r
177	Sec16b	Rgs6	Dnah7b	Pclo	Lrrc31	Vstm4	Scube1	Ptprc		177					Rps15a	Ptma	Lmna	Emp3
178	Fam166a	Tmeff1	Spaca9	Grtp1	Lad1	Plin4	Lrrc3b	Runx3		178					Rps25	Rpl8	Adamts9	Cfl1
179	Lhx1os	Sned1	Tenm4	Acot13	Lcn2	Gm15498	Acvrl1	Spic		179					Rpl12	Cd248	Zfand5	Cd86
180	Syt4	Rbm24	Actn3	Ret	Hpn	Olfr78	Ifi208	Gm21975		180					Marcksl1	Ptgis	Prss23	Plek
181	Rassf10	Smarca1	Gm16984	Gtpbp8	Gjb4	2010107G12Rik	Ephb1	Ms4a14		181					Rpl24	Ptp4a3	Gng5	Alox5ap
182	Cntnap2	Gm15915	Nnat	Nudt5	Cfc1	Cmtm5	Kitl	Ncf4		182					Ncl	Slc25a4	Bmpr2	Rpl9
183	Sdf2l1	Gm16638	Hpgd	Dhrs4	Gsta4	Wnt2b	Rnd1	BC094916		183					Fosb	Gng11	Klf4	Trf
184	Phactr3	St6galnac5	Glis1	Fmc1	Car2	Colec12	Crispld1	Lrrc25		184					Btg1	Rpl7a	Nfib	Arhgdib
185	Robo1	Slc24a3	Gm1604a	Mrps25	Car9	Hspb7	Itga1	Itgb2		185					Ubc	Ppia	Rps5	Rpl15
186	Wfs1	Hapln1	Hspb1	1700096K18Rik	Chrnb1	1500015O10Rik	Cd38	Arhgap9		186					Rpl28	Ccl11	Litaf	Id2
187	Lhx1	Ppp1r3b	Wdr17	Gadd45gip1	Mfsd4	Slc2a4	Afap1l1	Arhgap30		187					Tns1	Malat1	Cebpb	Ccl9
188	Atp2a3	Prox1os	Grik4	Tada2b	X1190005I06Rik	Adamtsl3	Rnf125	Was		188					Pdzk1ip1	Rpl22	Fau	Gnb2l1
189	Insrr	Crym	Igsf5	Abcb8	Tmem178	Fabp7	Akap2	Ccr2		189					Bag1	Gm8797	Ddx5	Sdc4
190	Olfm4	Clstn2	Trnp1	Mdm1	Acox2	Ddr2	Foxd2	Treml2		190					Rps2	Rps3a1	Snrk	Rpl27
191	Fer1l6	2900055J20Rik	Bco1	Nfxl1	AU022754	Gfpt2	Cyp26b1	Gpr84		191					Dstn	Ppib	Ptprg	AW112010
192	6430548M08Rik	Rragb	Pak7	Hint3	sep.06	Gm12840	Sgk1	RP23-81F19.2		192					Pvrl2	Fau	S100a13	Klf6
193	Hspa12a	Rad18	Me3	Enoph1	9130008F23Rik	A830082K12Rik	Dkk2	Ifi209		193					Eif3h	Rspo1	Eif4g2	H3f3a
194	Cttnbp2	Gpr119	Smim6	Lifr	Cldn10	2410004I01Rik	Nkx2-3	AC125149.3		194					Tm4sf1	Cyb5a	Aldh2	Gm2a
195	Galr3	Nefm	Pcp4	Sgcd	P4ha3	Col5a3	Ace	Susd3		195					Rpl35a	Eif3f	Itgb1	Rpl30
196	Gm2861	Calca	Prr16	Crybg3	Fcgbp	Jph2	Lims2	Olr1		196					Rpl34	Zfp36l1	Plaur	Actr3
197	Atp2a2	Large1	Efna5	Snhg20	Slc35f2	Pi15	Prkch	Tnfrsf17		197					Shisa5	Lsp1	Egr1	Marcksl1
198	Egfr	Dmrtc1a	Nexmif	Galnt14	Tnfrsf19	Mmp23	Tgtp1	Clec10a		198					Cxadr	S100a16	Btnl9	Cd53
199	Tcf24	Kcnj6	Ffar4	1600002K03Rik	4930556M19Rik.1	Gpr20	Parvb	Gpr34		199					Btf3	Dusp1	Wwtr1	Rpl7a
200	Adora3	Fam84a	Ogfrl1	Mrps34	Vnn1	C1qtnf7	Timp3	Traf3ip3		200					Naca	Selm	Kitl	Serf2
201	Pard6g	Pyy	Efcab10	Phtf1	Gm1661	Bnc2	Fzd4	Atp8b4		201					Rps28	Tpm1	Bhlhe40	Psmb8
202	Nabp1	Rnf112	Fam217a	Gad1	X4930523C07Rik	Pcdh18	Vwf	Cd300a		202					Rpl18	Capns1	Zfp36	Rps17
203	Zdhhc2	Pdzrn3	Nr5a2	Grk5	Dclk3	Htra1	Mfng	Ncf1		203					Maff	Rpl12	Ifrd1	Lsp1
204	Akr1c14	Maml2	Dclk1	Ccpg1os	Card10	Srpx2	Stc1	Cyp4f18		204					Bsg	Col6a1	Mcl1	Acp5
205	Adora2b	Gm15418	1110017D15Rik	Derl2	Mal	Pln	Lrp4	Cxcr3		205					Ctnnb1	Rpl9	Bst2	Junb
206	Carmil3	Slc39a11	Ramp1	AW549877	9530053A07Rik	Muc16	Gm13387	Vav1		206					Aplp2	Rpl27	S100a16	Grn
207	Neat1	Ankrd6	Col9a2	Sntg1	Sectm1b	Prelp	Syt15	Pira2		207					Nfix	Rps20	Jund	Clic1
208	Aqp11	P3h2	Enkur	Syt14	Plch2	Adgrd1	Adamts7	Dnase1l3		208					Mcl1	Phlda1	Hspg2	Cdc42
209	Mlph	Frrs1l	Lrrn3	Grin1	Adgrg6	Anxa8	Iigp1	Flt3		209					Rpl26	Cebpb	Cav1	Mcl1
210	Gm15651	Gc	Nrsn1	2700046G09Rik	Fam134b	Tbx3os1	Timeless	Mcemp1		210					Cd2ap	Aldh2	Rps23	Glipr1
211	Fras1	Tfpi	Gm28875	2810402E24Rik	Tm4sf20	Fgf18	Ppp1r16b	Gcsam		211					Rplp1	Dmkn	Plscr2	Spi1
212	Pdp2	Fam101a	Kazald1	Tmem167	Gm1818	Aoc3	Alox12	Myo1g		212					Ifi27	Ccdc80	Spag9	Ptpn18
213	Kcng3	Lpl	Ephb2	Ptprt	Slc30a3	Sfrp1	Nes	Klra17		213					Bhlhe40	Pcolce2	Rdx	Rpl31
214	Col6a6	Stab2	Irak3	Tcp11l1	Smim20.1	Gata5	Bean1	Irg1		214					Cystm1	Eef1g	Rpl15	S100a6
215	Dtnbos	Ccbe1	Gbp8	Mrpl35	Erbb2	Loxl1	Hotairm1	Sirpb1a		215					Prss2	Loxl1	Jun	Rpl41
216	Fmo1	Xkr4	Kbtbd11	Tmem163	Mmd2	Msc	Gimap8	Alox5		216					Arpc2	Tpt1	Cdc42	Fyb
217	Glp1r	Apoa2	Ppp2r2c	Dennd4c	Clu	Wnt2	Apold1	Prss30		217					Rpl38	Csrp1	Slfn5	Efhd2
218	Vil1	Ptprk	Adam23	Gas2	Gm5269	C130026L21Rik	Tead4	Gm46224		218					Sorbs2	Rhoc	Ebf1	Il1a
219	Scnn1g	Atcayos	Cacnb1	Rpp25l	Gm29096	Larp6	Rapgef5	Rac2		219					Eef1g	Fgf1	Phlda1	Mpeg1
220	Ky	Padi1	Nyap2	5033421B08Rik	Bche	Prrx1	Abi3	Stap1		220					Rpl27	Fos	Slc3a2	Pabpc1
221	Gm281	Lonrf2	Nlgn1	Eef1akmt2	Foxj1	Gpr37l1	Aqp1	5430427O19Rik		221					S100a16	Prdx1	Rps9	Itm2b
222	Gm16315	Lck	Ampd3	Aifm1	Cdc42ep1	Gsn	Pde2a	Hk3		222					Eif4a1	Serf2	Rpl13	Ms4a6c
223	P2ry1	Rcn3	Pyy	Rab3a	AI838599	Stum	Ptpre	A530040E14Rik		223					Rpl37a	Aldoa	Plcb1	Atf3
224	Adm2	Itpr1	Cdh22	Reps2	Ptgr1	Higd1b	Esam	Pdcd1		224					Osgin1	Tspo	Smad6	Cstb
225	Hs3st6	Sct	Sorcs2	Ins1	Slc1a2	Cybrd1	Dhh	Ly9		225					Id2	Cd151	Tshz2	Serinc3
226	9230112J17Rik	Pdzrn4	Slc8a2	Emilin1	Selenbp2	A730056A06Rik	Lrg1	Tnfaip8l2		226					Fgfr3	Tceb2	Tmem204	Eif4a1
227	Trpc4	Gls	Tc2n	Rnf2	Bmp8b	Scn4b	Wwtr1	Gapt		227					Tceb2	Uba52	Sh3glb1	Rpl38
228	Foxred2	Sema3e	Kctd1	Msra	Wfdc3	Fibin	Hoxa5	Sirpb1b		228					Csrp2	Rpl18	Hspa1b	Capzb
229	Gm15810	A2ml1	Traf5	Raph1	Platr22	Postn	C130074G19Rik	Klrd1		229					Atp5b	Mustn1	Tinagl1	Sepp1
230	Dusp14	Msantd1	Sema3e	1110008P14Rik	1700049E15Rik	Lgals1	Ifi44	Rnase6		230					Igfbp7	Mfge8	Sema7a	Uba52
231	Hyou1	AC146911.1	Ptn	Aff2	Ces1e	Gpc3	Gm4951	Lcp2		231					Tpm1	Marcks	Hnrnpf	Tuba1b
232	Fndc10	Map3k15	Kcnk2	1810008I18Rik	Gm11724	Tnc	Epas1	Arhgap45		232					Eef1d	Rps13	Gnb1	Eif3f
233	Mlxipl	Gpr137c	Parm1	Tm2d1	Fam71a	Dhx58os	Ebf3	Napsa		233					Spint2	Gpx1	Ppp1r2	Pld4
234	Ush2a	Lrrn3	Tiam1	Fam173a	Krt19	Cd55	St8sia6	Itgb7		234					Ifrd1	Sep15	Isg15	Tspo
235	Nptxr	Cited1	Tmem132b	Epb41	Plcd3	Gm26523	F2r	Ccl24		235					Prdx1	Hspb1	Cd47	Klf2
236	Vps8	Rbms3	Gm42439	Gm42418	Plet1	Rasl12	C1qtnf9	Dcstamp		236					Snhg18	Sema3c	Nr4a1	Ptprc
237	Mt2	Serpina1b	Krtap17-1	Pde5a	6030407O03Rik	Inmt	Akap12	Mir142hg		237					Prr15l	Ly6e	Snu13	Tnip3
238	Hspb6	Cst3	Gabrb3	Vps13c	B230344G16Rik	Cox4i2	Gm9917	H2.DMa		238					Cxcl2	Cyr61	Hsp90aa1	Socs3
239	Dcaf12l1	Atp8b5	Plekhb1	Mrps24	Rnf225	Pdgfrb	Adam12	Batf3		239					Calm2	Gpm6a	Tnfaip1	Gm10260
240	Gm3636	Spon2	Dock1	Nipal1	Fam181b	Bmp5	Ednrb	Arl5c		240					Hdgf	Col6a2	Rap1b	Rgs2
241	Otoa	Sntg2	Acot7	Tmem192	Onecut2	Rspo3	9930111J21Rik2	Tgfbi		241					Rbm39	Naca	Icam2	Ier5
242	Slc4a10	Gm31763	Rab3b	Pard3	Slc44a4	Des	Adamts9	Clec2i		242					Muc1	Ednrb	Plat	Dusp2
243	Tepsin	Nrcam	Ccdc106	Kdm2b	Dmbt1	Mgp	Magix	Adgrg5		243					Ctnnd1	Cd9	Pmepa1	Taldo1
244	Scnn1b	Gipc2	Slc29a4	Fam110b	Zglp1	C1ra	Hspg2	Iglc2		244					Capns1	Alad	Rps3	Ldha
245	Gm26682	1010001N08Rik	X1190002N15Rik	Sec16b	Vcam1	Wfdc1	Hlx	Tnfsf14		245					Nudt19	Ltbp4	Rpl9	Irf8
246	Dnaic2	Gnai1	Stk39	Abhd15	X1110038B12Rik	Sox8	Fscn1	Il7r		246					Cstb	Ifi27	Mef2a	Ifrd1
247	Dnajc24	5330439M10Rik	Nrg1	Akr1c12	Lrrc8e	Atp1a2	Slc1a1	Haao		247					Rpl15	Ecm1	Mat2a	Trem2
248	Sv2a	Syt9	Vsig2	Rreb1	Gm13157	Abi3bp	Thbs1	Nxpe5		248					Gng5	Pmp22	Vamp5	Eef1b2
249	Rgs11	Sorcs2	Gm11837	Pcsk1	Casp12	Map3k7cl	Galnt15	Cst7		249					Socs3	Txn1	Cnn3	Fcgr3
250	Insig1	Prr16	2010300C02Rik	Gm30173	Paqr6	Igf1	BC028528	Cd209b		250					Ahnak	Pabpc1	H3f3a	Cdkn1a
251	A930019D19Rik	Nudt10	Cited1	Selenoo	Gm14198	C3	Cavin3	Syk		251					Ifitm3	Tmem100	Rps27	Gdi2
252	Fam217b	Pnoc	Ccbe1	Pcx	Phyhd1	Mustn1	Tek	Acp5		252					Gm8797	Rpsa	Eml1	Rac2
253	Slc2a6	Cpt1c	Gm15738	Zc3h3	St3gal4	2810433D01Rik	Ets1	Bin2		253					Tspo	Gpx4	Ftl1	Ctsa
254	Syt3	Gm28172	Fam81a	Gga2	Aqp5	Hoxb8	Tmem26	H2-DMa		254					Uba52	Htra1	Hes1	Hspa1b
255	Rsph4a	Sh3bgr	Wfdc16	Smim1	X2610035D17Rik	Cpxm1	Slc9a3r2	Ifi207		255					Gltscr2	Col14a1	Angpt2	Cd72
256	Frmd5	Dpyd	4930502A04Rik	Rida	Zfp85os	Foxs1	Ier5l	Cd69		256					Rpl27a	Cygb	Rflnb	Rpl5
257	Ikzf3	Pkd1l1	Scel	Gramd3	Serpinb6b	Medag	Col4a1	H2-DMb2		257					Dhrs3	Nenf	Fosl2	Ly6e
258	Brsk2	Nap1l5	Kcnb2	Vegfb	Gm14420	Cyp1b1	Cdc42ep2	BC035044		258					Errfi1	Anxa5	Tagln2	Cxcl1
259	Ppp1r42	Lrig1	Tceal5	Stk26	Ces1b	Adamtsl5	Tspan18	Cd300lb		259					Hspa8	Sparcl1	Luzp1	Clps
260	Galnt14	Lgi2	Prrg4	Psmg2	Rasef	Ifi202b	Gimap1	Acod1		260					Ppp1r1b	Rpl11	Chchd2	Marcks
261	Acot11	Schip1.1	Rerg	Defb1	Phlda2	Tusc5	Ackr1	Irf4		261					Lgals1	Msln	Rps4x	Rbm3
262	Grin2c	Sgce	Per3	Eef1e1	AI464131	Crispld2	Nkx2.3	Csf2rb		262					Vamp8	Cox4i1	Eif4a1	Rps21
263	Anks4b	Gcnt4	A930033H14Rik	Fam173b	Sptssb	Lamc3	Eva1a	Hmha1		263					Fau	Tm4sf1	Pfn1	Plin2
264	Phactr1	Rbm11	Pak1	Zfp275	Gm11266	Aspn	Tm4sf1	5031414D18Rik		264					Glo1	Trf	Itga1	Hsp90ab1
265	Capn9	Egr4	Ank1	Tmem206	Cldn8	Ndufa4l2	Mapk12	Lat2		265					Cnbp	H3f3b	Mcam	Prdx5
266	Il1r1	Zfp618	Pnck	Nans	Tmem45b	Ephx3	Epha4	Cd209f		266					Cnn3	Rcn3	Rhoa	Lst1
267	Sorl1	Cntnap5b	Naaladl2	S100a1	Cdh16	Arhgap20	Nrp2	AI662270		267					Fermt1	Eef1d	Rps20	Tubb5
268	Matn2	Dclk2	Tle4	Ndufs7	1700019G17Rik	Tpm2	Entpd1	Gpr132		268					Timp2	Serpine1	Rps29	Slc3a2
269	Syp	Gm19705	Golga7b	Bola1	Trex2	Olfr558	Tgfb1	Siglecg		269					Rpl41	Map1lc3a	Clec14a	Hcls1
270	Msmo1	Nrg1	Chgb	Cttnbp2	X2610307P16Rik	Myl9	Kcnk5	Trem3		270					Cdkn1a	Thy1	Rhoj	Rel
271	Syndig1l	Gnas	Cdh4	Lppos	Clmn	Lgals2	Gvin1	Cd209d		271					Rps21	Osr1	Hspa1a	Slfn2
272	Lrrn2	Pcsk1n	1700063D05Rik	Cabp1	Zfp750	Igfbp4	Grap	Folr2		272					Hnrnpa1	Cd47	Cdc42ep2	Hexa
273	Ttyh2	BC051142	Eci3	2510046G10Rik	Cldn2	Agtr1a	Sparcl1	Itgam		273					Ctnna1	Rps27rt	Rpl7	Akr1a1
274	Tmem229b	Rtn1	1810041L15Rik	Cryl1	Abhd1	Gm34030	Adgrf5	Clec4a1		274					Rps12	Rhoa	Ppp1r15a	Cd300c2
275	Slco1a5	Agpat4	Dnah9	Umad1	Spns3	Myh11	Prdm1	Fcgr2b		275					H2-K1	Plxdc2	Pcdh17	Oasl1
276	Abcb4	Gfod1	Hgfac	3110062M04Rik	Pdgfc	Ndrg2	Trim16	Vpreb3		276					Sqstm1	Col4a1	Sash1	Cox4i1
277	Slc35b4	Krt1	Lima1	Cad	Fgfrl1	Lrp2	Ephb4	Amica1		277					Hnrnpf	Egr1	Eva1b	Cytip
278	Gmppb	Sytl5	Sult1d1	Zc3h12c	Zfp385b	Mnda	Hoxa7	Slc13a3		278					Arpc1b	Rbms1	Eef2	Eef2
279	Gpsm1	Tmem27	1190002N15Rik	Mvb12a	Lrrc16a	Slc6a2	Gbp4	P2ry6		279					Krt23	Fkbp1a	Map1lc3b	Naca
280	Mpp3	Mycbpap	Tmtc1	Galr1	Gm10384	Cdh11	Cxcr4	Gm35154		280					Rpl8	Adamts5	Prkch	Ifitm2
281	Chd7	0610009L18Rik	Ambp	Jpt2	Mboat1	Adamts12	Chst15	Lrmp		281					Ptgds	Serpinf1	Car4	Txn1
282	Fkbp11	Spats2l	Asph	Uchl3	Psors1c2	Slc1a7	Kank3	Pou2af1		282					Xist	Tubb5	Pdlim1	Npm1
283	Tmem268	Pak6	Gprasp2	Tfpt	Cyp2s1	Cspg4	Efnb2	Cd209g		283					Cldn10	Aspn	Ier5	Bcl2a1a
284	Tspan2os	Csmd2	Tmem35b	Tmem160	Fmo2	Lrrc17	Gzmk	Pf4		284					Cela2a	Aprt	Rplp1	Clta
285	Asic1	1700007L15Rik	Prdm16	Polr2i	Tead2	Itga7	Exoc3l4	Gm44205		285					Hmgb1	Lhfp	Cd151	Tlr2
286	AC162693.1	Bach2	Arhgef38	Pi4kb	Gadl1	Nrn1	Tnfrsf26	Tifab		286					Tgif1	Mif	Notch1	Gngt2
287	Igf1r	Rab26os	Shank2	Rhobtb1	Adam8	Gm9913	Gm10687	Tnni2		287					Wwc1	Pla1a	Tspo	Btf3
288	Hmgcs1	Nos1ap	Tmeff2	Pbx3	Ugt2b36	Notch3	Sncaip	Gata3		288					Vim	Rbp1	Slc38a2	Anxa5
289	Plch1	Foxp2	Itgb6	Them6	Aldh1a1	Glt8d2	Lhx6	Ryr1		289					Btg2	Rpl10-ps3	Stmn2	Psme1
290	Cabp7	Prr15	Rnaset2b	Map3k10	Hrsp12	Prrx2	Spry4	Cd79b		290					Eif3f	C1s1	Arhgap29	Pla2g7
291	Madd	2210013O21Rik	Zcchc12	Npnt	Ctgf	Sod3	Rnf144a	Hvcn1		291					Ftl1	Eif1	Hmox1	Sdcbp
292	Gm44850	Serpina7	Susd4	Pam16	Serinc2	Mrap	Notch4	Ocstamp		292					Fam107b	Rpl23a-ps3	Sox18	Hmgb2
293	Btbd17	Ppargc1a	Psd	Timm8b	Galnt3	Rbpms2	Synm	Retnlg		293					Tinagl1	Rpl15	Cnbp	Tgfb1
294	Defb1	Mast2	Sim1	Oard1	B430203G13Rik	Gdf10	Itgb3	Ltb4r1		294					Atf4	Sptbn1	Fth1	Anxa2
295	Fdps	Zfp804b	Peg10	Enpp2	Pacsin3	Cfh	S1pr4	Cd84		295					Ndufa4	Ctsb	Nrarp	Hspe1
296	Dmpk	Resp18	Hdac9	Nars2	Unc5cl	Mrvi1	Dab2	Ikzf1		296					Shfm1	Morf4l1	Gnb2	Gm10709
297	Gm10941	Tcp11	Bambi	Amz2	Il17rb	Gypc	Ltbp4	Hp		297					Onecut2	C2	Rpl24	Arpc4
298	Spc25	Bend7	Tmcc3	Cerkl	X1700017B05Rik	Krt15	Zbtb46	Cd200r1		298					Cldn6	Ier2	Skil	Rack1
299	Tmem206	Cnih2	Top1mt	Phf10	Sox6os	Ggt5	Osmr	Tnfrsf13b		299					Hnrnpab	Npm1	Smad7	Tpm3
300	Lrrc27	Dync1i1	Syt17	Ciao1	RP23-4H17.3	Tagln	Ccno	Slc37a2		300					Srsf5	Creb5	Itpkb	Lamp1
301	Mreg	Mcub	Stmn3	Lmtk2	Smtnl2	Olfml1	Msn	Pax5		301					Atp5a1	Rpl27a	Arhgdia	Myl12a
302	Ust	Zkscan2	Slc5a3	Rad51ap2	X2610528J11Rik	Mamdc2	Klk8	Rgs18		302					Rps27a	Rps27a	Rpl3	Mafb
303	Frmd8os	Srgap2	Sez6l	Tmem164	Acnat1	Gucy1a3	Chst7	Smpdl3b		303					Eif6	Ackr3	Ace	Hsp90aa1
304	Acly	Guca1a	A330008L17Rik	Trappc9	Celsr1	E330013P04Rik	Tnfaip8l1	Csf1r		304					Ctgf	Rps21	Ostf1	Myl6
305	Xk	Gspt2	Capsl	C1galt1	Tgfb3	Daam2	Sh3bp5	Tnfrsf13c		305					Bcam	Mmp23	Rps2	Nfkb1
306	Ret	Olfm1	Erc2	Dct	Ugt2b35	Dnm3os	Lamb1	5830432E09Rik		306					Lmo4	Shfm1	Pim3	Slamf9
307	Gm44109	9330151L19Rik	Kcnmb1		Myc	Nrip2	Exoc3l	Bfsp2		307					Tgm2	Eif5a	Adipor1	Tnfaip3
308	Rspo4	Enpp1	Efemp2		Spink4	Bst1	AW112010	Cacna1s		308					Krt7	Thbd	Gpx4	Sqstm1
309	C8g	Hs6st3	Hlf		Col9a3	Adamts5	Plxna4	Zeb2os		309					Tshz2	Jund	Col15a1	Cebpb
310	Creg1	9030622O22Rik	Pld1		Shroom1	Axl	Slc16a3	Grap2		310					Plaur	Arpc2	Rpl28	Ubc
311	Gm16174	Tram1l1	Car8		Sfn	Prdm6	Adamts4	Ms4a1		311					Gstm1	Dpep1	Dusp6	Capza2
312	Plk3	Arl4d	Fgf9		Abcc3	Sostdc1	Gja1	Sell		312					Gpx1	Fndc1	Robo4	Il1rn
313	Rimkla	Nhsl1	Gm572		Angptl1	Arhgap42	Srgn	Cd244		313					Pbx1	Lamp1	Psmb8	Shisa5
314	Lancl3	Man1c1	3110021N24Rik		9330121J05Rik	sep.04	Prrg1	Tlr1		314					Rpl9	Wfdc1	Nrp2	Clic4
315	Pclo	Akap17b	Tmem59l		Gm15895	Il6	Hoxb5	Cd68		315					Smco4	Lmna	Myh9	Ptprj
316	Tmem8	Tnr	Gm47096		Muc20	Gabra2	Lama3	Zmynd15		316					Stt3b	Hmgb1	Rps18	Dnajb1
317	Scg2	Upp1	Kif27		Mex3a	Sulf1	Mdfi	Dppa3		317					Clic4	Cfl1	Icam1	Syngr2
318	Dffb	Zim1	Plagl1		Dio3	Wbscr17	Pdzd2	Sash3		318					Rpl36	Oat	Rapgef5	Arhgdia
319	Igsf11	Rnf32	Tmem246		Dnali1	Mmp19	Bmx	Myo1f		319					Tacstd2	Cox4i2	Smpdl3a	Cela2a
320	Cib2	Klf12	Map2k6		Garem	Casq2	Tbkbp1	Gm26522		320					Ppp1r15a	Capzb	Sdcbp	Cd63
321	4930550C14Rik	Kit	Rnf208		Gm29095	Pdpn	Fbxl7	Rgs14		321					Eif3k	Rpl38	Actn4	Rab8b
322	Usp35	Fam20a	Ifnlr1		Tmem229a	Aldh1a2	Hoxa4	Cd300lf		322					Ndufa6	Calr	Dll4	Dock10
323	Pparg	Aplp1	Clstn3		Sema3b	Hspb2	Inpp5d	Cd163		323					Timp3	Lrp1	Sema6d	Snx5
324	Lrfn4	Selenoi	Adgrb3		Adamts15	Antxr1	Lrrc8c	Itgal		324					Iqgap1	Des	Rbm39	Gnai2
325	Ttyh1	Ccdc8	Spock1		Pla2g5	Adra1b	Gja5	Cxcl2		325					Ctrb1	Btf3	Eif5	Gmfg
326	Fitm2	Dynlt1c	Slitrk6		Sphk1	Shisa8	Ggta1	Lcp1		326					H3f3a	Ptms	Btf3	Eif3h
327	Nrtn	Wnk2	Pabpc1l		Slc9b2	Slc5a5	Layn	Ptpn7		327					H2afv	Calm2	Sertad1	Gng5
328	B3galt1	Cpq	Samd14		Ctse	Rem1	Vwa1	Pstpip1		328					Cd47	Gng5	Tubb4b	Fam49b
329	Lmx1b	Tmem59l	Auts2		Agrn	Zfp385a	Myzap	Csf2rb2		329					Gadd45b	Tagln2	Bvht	Sub1
330	Pex11g	Slc2a3	Kirrel2		Gm15440	Ppp1r14a	Fat4	Dpep2		330					Kcnn4	Oaz1	Gja1	2210010C04Rik
331	Cda	Ctnna2	Sh3bgrl2		Flna	Mroh2a	Fam198b	Cytip		331					Tspan8	Sat1	Emp1	Gltp
332	Mfsd6l	Ffar4	Plppr1		D8Ertd82e	Angptl2	Fam101b	H2-Eb2		332					Arf1	Il33	Klf13	Pde4b
333	Akr1c12	Vegfc	Tmem110		Sdc1	Lhfp	Cavin1	Map4k1		333					Lrrfip1	Islr	Arf1	Nfkbiz
334	Phgdh	Dennd2a	Tekt2		Gm26880	C1qtnf2	Gm38832	Lpcat2		334					Mpc2	Bcam	Nedd9	Rpl29
335	Ppp1r3d	Cdo1	Gm26916		4933415A04Rik	1110002O04Rik	Gm26669	Themis2		335					Fus	Sdpr	Rps15	Rnaset2a
336	Gm45805	Pak7	Fam13c		D630003M21Rik	Fzd2	Scgb3a1	Irf5		336					Ube2d3	Map1lc3b	Ankrd11	Rac1
337	Spcs3	Hcn1	Dennd2a		Ceacam16	Aspa	Ppm1j	Mir155hg		337					Bgn	Ifitm1	Fscn1	Ifit1
338	Gm45847	Gm26561	Hap1		X1810032O08Rik	S100b	Ly6a	Il21r		338					Tra2b	Selk	Nid1	Plbd1
339	Trpm2	Nptx1	Sgce		Mab21l3	Vtn	Ehd4	Lgals3		339					Sptssa	Hmgn1	Snrpb	Cela3b
340	Cd79a	Plcl1	Ncald		Fam46b	Pdlim2	Nxpe2	Dusp2		340					Alcam	Eif4a1	Ptprm	Lyn
341	Ndufs2	Ston2	Gm45881		Gm29994	Efs	Dlc1	Siglece		341					Sat1	Errfi1	Macf1	Msn
342	Hopx	Gatsl2	Filip1		Igsf9	Emilin2	Crim1	Fcna		342					Ptms	S100a1	Rpl6	Arpc5
343	Ddc	Plekhh2	Tle6		Erbb3	Gm10561	Adamts1	Fgr		343					Rpsa	Sdc4	Rasgrp3	Pmepa1
344	4930524O07Rik	Pcp4l1	Hspa12b		Homer2	Ifitm1	Pxdc1	BC049352		344					Rps20	Rpl19	Fos	C3ar1
345	Abhd17c	4930517O19Rik	Cldn6		Trip6	Heyl	Stab1	Ptger2		345					Cyb5a	Hspa8	Adgrl2	Hnrnpf
346	Actrt3	Gm26836	Egr4		Gm43949	Slc10a6	Cdc42ep3	Cd37		346					Rtn4	Snrpg	Dnaja1	Iqgap1
347	Ogdhl	Gpld1	Fgf12		Cat	Nfatc4	Apol8	Ltc4s		347					Aldoa	Nfkbia	Rpl7a	Blvrb
348	Nr1h3	Ocrl	Scn3a		Sult1a1	Necab3	Micall2	Dock2		348					Ppib	Rac1	Bnip2	Gadd45b
349	Hist2h3c2	Rpl13a-ps1	Lrrc8b		Tgm2	Foxf2	Rflnb	Phf11b		349					Set	Serpinb6a	Tspan12	Pkm
350	Lss	Bcl11a	Scn9a		Fads3	5033428I22Rik	Zfp503	Gpr141		350					Tuba1b	Tgfbr2	Csrp1	Ostf1
351	Slc4a7	Alcam	X1700086L19Rik		Ano1	Tmprss5	Mn1	Snx20		351					Txn1	Id1	Srsf3	Kctd12
352	Asns	Ctsz	Gm13052		Tead3	Mrc2	Cysltr2	Fpr2		352					Cox7c	Mmp2	Ube2d3	Gna13
353	Hist1h4i	Nyap1	Misp		Pllp	Cxcl5	Ppic	Fcer1g		353					Ccnl1	Wdr89	Srsf2	Ppib
354	Tmod1	Arntl2	Dct		Cfb	Mylk	Fmnl3	Ppfia4		354					Tpm4	Fcgrt	Lims2	Slamf7
355	Eps8	Gm44686	Igsf1		Slc4a11	Ahnak2	Tnfaip2	Pou2f2		355					Fis1	Psap	Myl12b	Oaz1
356	Arhgdig	Vipr1	Fggy		Fbln2	Fgf7	Map3k6	H2.DMb1		356					Fmo2	Tpm4	Kctd12b	Tagln2
357	Zfp324	Myo1b	Pex5l		Prss8	Gng8	Gm12185	Lilra6		357					Clmn	Higd1b	Map1lc3a	Rab20
358	Vdr	Cd59b	Baiap3		E230013L22Rik	Il34	Arhgap27	Il18rap		358					Ywhae	Rps10	Sh3bp5	Cox5a
359	Svip	Gm609	Gm4128		Gckr	Prkcdbp	Lpar4	P2ry10		359					Cdc42ep1	App	Rpl18	Gpi1
360	Creb3l1	Apitd1	Sntg1		Btc	Stac	Hrct1	D5Ertd605e		360					Ppdpf	Lgals3	Tubb6	Prss2
361	Frzb	Mgmt	Tmlhe		Ifi27l2b	Twist1	Plat	Cxcl9		361					Raly	Ddah2	Rbm3	Rhoa
362	Chrnb2	Dusp26	Ocrl		Il18r1	Tmem119	Gimap9	AI504432		362					Myh9	Clic1	Jam2	Arl5c
363	Tor3a	Gm15283	Sulf2		Tgif1	Fhl5	Alpl	Btla		363					Sfn	Fhl1	Qk	Selplg
364	Slc22a23	E230001N04Rik	Gm26883		Lama5	Itih5	Msx1	Fam26f		364					Gapdh	Adamts1	Rras	Ifi207
365	Nucb2	Zbtb16	Frmpd4		Dusp9	Abcc9	X8430408G22Rik	Fcrl1		365					Klf13	Atf5	Rps6	Rilpl2
366	Cyp51	Thbs3	Plppr4		Inadl	Art3	Tmem44	Gm43603		366					Hnrnpa3	Jun	Upp1	Tkt
367	Pfkfb2	Nlgn1	Nek5		Rasl10a	Cnn1	Sh2b2	Cbr2		367					Rps3a1	Tubb6	Wasf2	Cd36
368	Tmem121	Carmil1	Tmed6		Tmem125	Vstm2b	Tcf15	Ncf2		368					Akr1a1	Gpx8	Tie1	Ninj1
369	Msln	Hectd2	AC151836.1		Tmc5	Col6a5	Car5b	P2ry10b		369					Hsp90aa1	Mxra8	Ywhab	Csf2ra
370	Actn2	Tesc	Fhad1		G630090E17Rik	Fstl1	Ppp1r18	Il1rl1		370					Bri3	Slc12a2	Marcksl1	Lilr4b
371	Chac1	RP23-54G8.4	Pgf		Itgb4	Cxcl3	St8sia4	Tspan32		371					Sema3c	Cdc42	Arrdc3	Dynll1
372	Col6a3	Gm20721	Plekha7		Tchh	Ifi27l2a	Id1	Arhgap22		372					Map1lc3b	Sod3	Irf1	Pfdn5
373	Mns1	5730522E02Rik	Pamr1		Rin1	Ngfr	Hey2	Gm20513		373					Hnrnpk	Rpl5	Rpl8	Cd9
374	Cgref1	Sdc2	Cspg5		Hs6st2	Xpnpep2	Rapgef3	Traf1		374					Plscr1	S100a13	Sh3bgrl3	Brk1
375	Emid1	Kbtbd11	Met		Lbp	Pth1r	Hoxa3	Gm33370		375					Sh3bgrl3	Sept7	Rpl21	Msrb1
376	Scd2	Gm15441	Spag6l		Vill	Epha3	Cd34	Apbb1ip		376					Cadm1	Gstp1	Dusp3	Rapgef2
377	Rasd2	Sptb	Ncs1		Gm10263	Fgf2	Cdh13	Vsir		377					Tax1bp3	Rcn1	Sema3f	Zfand5
378	Slc18a1	Colgalt2	Sntg2		Egln3	Adgra2	Hoxb7	Tnfsf8		378					Pim3	Cd302	Btg2	Nfe2l2
379	Tigar	Arrdc4	Cadm1		Edn1	Bgn	Tmem47	AB124611		379					Pdgfa	Entpd2	Socs3	Eif3k
380	Nectin1	Shroom2	Vav3		Epha2	Mfsd7c	Wisp1	Hcls1		380					1700011H14Rik	Lpl	Heg1	Tnfaip2
381	Pitpnm3	Igf2bp3	Adam22		1810064F22Rik	C4b	Lama4	H2-Ob		381					Ddx5	Gpc3	Ddit4	Man2b1
382	Banp	Ncs1	Cdo1		Ly6d	Eln	Piezo1	Cd80		382					Pcbp2	Actg1	Rps7	Rap1b
383	Dnmt3bos	Pde8b	Ccdc39		Fam110c	C1qtnf1	Vamp5	Ptprcap		383					Snrpb	Fam162a	Hecw2	Cd44
384	4833439L19Rik	1500026H17Rik	Trpm3		Hebp2	Itgbl1	Slit3	Tlr12		384					Tuba1c	Socs3	Elk3	Arl4c
385	Slc2a5	Speg	Smpd3		Rprm	Bdh2	Sparc	Nfam1		385					Eif3c	Oaf	Tnfrsf1a	Ehd1
386	Ufm1	Nostrin	Acot1		Prdx6b	Bmper	Ramp2	Apoe		386					Ddx3x	Thbs1	Pcbp1	Rpl10-ps3
387	C2cd4b	Gast	Gm11099		Gm13713	Fn1	N4bp3	Trim30b		387					Ccnd1	Tpi1	Tubb5	Zfp36l1
388	Gipr	Col27a1	1500009L16Rik		Wwc1	Gas7	Sema4c	Glipr1		388					Pfdn5	Sfrp4	Crim1	Sh3glb1
389	Pdxp	Agt	Rgs2		Proser2	Cldn15	Pcdh20	Cyth4		389					Ran	Cox6a1	Lrrc32	Ifih1
390	B3galt5	Osbpl6	Fam241b		Prss22	Adamtsl1	Hoxa2	Gpr171		390					Wfdc2	Eln	Tmed5	Gm11808
391	Tmem163	Ndn	4930570B17Rik		Vwc2	Dkk3	Ptgs1	Arhgap15		391					Map3k1	Col4a2	Pnrc1	S100a4
392	Prkar2b	Tanc2	Lrp8		Rab27b	Sh3rf2	Adgrl2	Trbc2		392					Gsta4	Gas7	Map4k4	Gm9843
393	Dio1	Ncam1	Il18		Mllt4	Irs3	Tcim	Rhoh		393					Clta	Eif3h	Btg1	Metrnl
394	B3gnt3	Gm7334	Fam46a		Cdrt4	Bmp4	Wwc2	Sp140		394					Eif1	Rps24	Top1	Gatm
395	Gm47431	Gm8797	AC161607.1		Zswim6	Npy1r	Ccdc85a	Phf11a		395					Snrpg	Heg1	Ncl	Vasp
396	Dhrs4	Atf3	Crlf1		Cyr61	Itga8	Il2rg	Plek		396					H1f0	Ngf	Gimap4	Pitpna
397	Actr3b	Tmem178b	Aox1		Gas6	Nr2f1	Tnfsf10	Cd83		397					Cat	Nr4a1	Snx3	Timp2
398	Serp1	Itga2b	Lhfpl5		Fkbp6	Ctsk	Cracr2b	Card11		398					Ehf	Zeb2	Ctnna1	Erp29
399	Lman1	Pak3	Sema6a		Ninl	Naalad2	Ier3	Btk		399					Idh2	Dlc1	Gngt2	Shfm1
400	Jakmip1	Sox6	Rgs7		Zfp36l1	Tmem35	Ripk3	Gimap3		400					Alad	Cnbp	Ctsl	Litaf
401	Cabp1	Tvp23a	Nab2		Acsm3	Pcdh19	Pdgfb	Aoah		401					Rpl23a-ps3	Tshz2	Dab2	Tgfbr1
402	Gm46123	Slc25a27	Bag3		Il23a	Ecm1	Dusp6	2810417H13Rik		402					Ets2	Tgm2	Dazap2	Tmem123
403	Galnt18	Fam126a	Tox		2200002D01Rik	Gm43101	Gng11	Tnfrsf18		403					Eif4a2	Pdgfrb	4931406P16Rik	Rnf149
404	Cryl1	Olfm3	Corin		Cdh6	Olfml2a	Emp1	Klrk1		404					Sec62	Gm10073	Ahnak	Esd
405	4933432K03Rik	Nxpe4	Phyhipl		Frat2	Gm13305	Ston1	Lyl1		405					Rpl10-ps3	Hmox1	Arap3	Ms4a6d
406	Psd4	Spin2c	Gbe1		F3	Gm13861	Plk2	Gm37168		406					Srsf3	Notch3	Brd2	Tmbim6
407	Gm12962	Scn3a	Gucy1a1		Gm17634	Susd5	Swap70	Il2rb		407					Serpinb6a	Mgst1	Rps24	Creb5
408	Piga	Oat	Hectd2		Evc	Col4a6	Phf11d	Cxcr5		408					Adam33	Epas1	Rps12	Grb2
409	Syt13	Cdyl2	Rbm11		Acss1	Lrrc55	Gbp3	Il2ra		409					Actr3	Myh11	Rpl19	Cd48
410	Diras1	Rhou	X5330417C22Rik		Ambp	Efhd1	Lrrc2	F13a1		410					Polr2m	Sumo2	Ivns1abp	Nlrp3
411	Prepl	Tsix	Gng2		Tmem82	Cd302	X2510009E07Rik	Mrc1		411					Srsf2	Cox6c	Hmgb1	Snrpg
412	Derl2	St3gal6	Dnajb3		Mmp15	Prph	Gda	Nfe2		412					Plpp2	Atp5b	Fus	Axl
413	Rdh16f2	Gpc6	Aldh3b1		Ddah2	Slc6a13	Ifitm3	Btnl2		413					Rps27l	Hsp90ab1	Vwa1	Lat2
414	Fbxo2	St6gal1	Ankrd6		X4930581F22Rik	Sema3d	Mndal	Slamf6		414					Rhoa	Hcfc1r1	Vgll4	Skil
415	Ddx31	Scg5	Il18bp		Cdk6	Ptrf	Col4a3	Cd14		415					Aes	Rhob	Sod1	Wdr89
416	Nckap5	Atxn7l1	Egr3		Mkrn3	Cmah	Gngt2	Pik3ap1		416					Zfp36l2	Msn	Morf4l1	Tuba1c
417	Ckb	Mthfs	Tpd52l1		Trpv4	Kank4	Mertk	C130026I21Rik		417					Rpl39	Procr	Rassf1	Malt1
418	Tmtc3	D430019H16Rik	Gpr183		X1810011O10Rik	Galnt16	Icam1	Slfn8		418					H2.K1	Plat	Eif6	Rps27rt
419	Lrrtm2	Igf2bp2	Cbarp		Rpl21.ps4	Plce1	Ehd2	Ctsc		419					Ldha	Cd55	Srsf5	Prr13
420	Gpx2	Trim2	Gm26797		Selenbp1	Gpx8	Klhl5	Ms4a4b		420					Lasp1	Arhgdia	Eif2s2	Cd47
421	Rnf186	Rnf130	Cdh2		Sncg	Tmem221	Smagp	Rgs10		421					Proser2	Prr13	Nfe2l2	S100a10
422	Lrrc16b	Tcte2	Smim5		2810408A11Rik	Stmn4	Lmo2	Hrh1		422					Ptgr1	Ifrd1	Lamc1	Eif5a
423	Tenm3	Trim35	Katnal2		Evc2	Entpd2	Pltp	Bach2os		423					Litaf	Uqcrh	Rpl17	Uqcrh
424	Rnf150	Sgms1	Cdh8		Myrf	Islr2	Sh3tc2	Rab7b		424					Gstt1	Emp1	Rpl34	Evi2a
425	Mvd	Rgs20	Ppy		Cndp1	Gm20467	Afap1l2	Parvg		425					Cdc42	Cfh	Plxna2	Ywhah
426	Apof	Wfdc16	Igsf8		Ihh	Eya4	Rasgrp2	9930022D16Rik		426					Eef1b2	Tnxb	Maff	C5ar1
427	Edem1	Sim1	Stxbp6		BC029214	Zcchc24	Nmb	Slc38a1		427					Ywhaq	Eif4g2	Serbp1	Cmtm7
428	Camk2n1	Gstm7	Ror1		AA986860	Phf24	Tinagl1	Il1rn		428					St14	Ier5	Elf1	Capg
429	Amd2	E030030I06Rik	Hspa1b		Aif1l	Itm2a	Ifi203	Cxcr6		429					Lmna	Gpc6	Cx3cl1	Dazap2
430	Sel1l	Riiad1	Hmgb3		Galm	Begain	Plaur	Iglc1		430					Pkhd1	Cldn15	Map2k3	Ptafr
431	Kcnip1	Gpsm2	Mapt		Serpinb9b	Flnc	Id3	Cx3cr1		431					Cct2	Iscu	Uaca	Vamp8
432	Sgcd	Prrt1	Fxyd6		Spns2	Lmntd1	Nckap5l	Rasgrp4		432					Txnip	Mylk	Cox5a	Ppp1ca
433	Bmp1	RP23-218K15.3	Trps1		X5430416N02Rik	Acsm3	Ada	Gmfg		433					Atp5o	Gstm2	Tiparp	Cnn2
434	Slc35b1	Cadm1	Sec14l4		Erbb4	Gm15675	Slco2b1	Pik3r5		434					Cela3b	Ergic3	Iigp1	Itgb5
435	Maob	Cpn1	Fam19a1		Adamts16	Wnt11	Fhod1	Aim2		435					Slc25a3	Il6	Rtl8a	Ctrb1
436	Insm1	Ppfia2	Sgk2		1700026L06Rik	Gm13431	Pdlim1	Cd3d		436					Slco3a1	Penk	Ldb2	Calm1
437	Greb1l	5330417C22Rik	Syt5		Dnajb13	Pigz	Id4	Tnfsf13b		437					Gm10263	Vat1	Sptan1	Hck
438	Vldlr	Cldn9	Gm20696		Gm13111	Gm13470	Thbd	AA467197		438					Acaa2	Gm9843	Ces2e	Calr
439	9130023H24Rik	Proc	Msh3		Ltb	Pla1a	Gja4	Trem2		439					Dazap2	Ywhab	Rpl4	Tapbp
440	Slc16a9	BC052040	Nol4l		Gm3716	Fxyd1	Klhl6	P2rx7		440					Pdlim1	Tmem50a	Fez2	Pnrc1
441	Pctp	Arhgef9	Fam92b		Flrt2	Abhd11os	Lmcd1	Mmp9		441					Hsd17b10	Slc9a3r1	Tmod3	Bri3
442	Trabd	Zranb3	A2ml1		1700040L02Rik	Slc43a1	Nos3	Fermt3		442					Rhoc	H2-K1	Psme1	Ifi30
443	Chga	0610011F06Rik	Gprasp1		Aldh1l1	Cilp	Ifi47	Cd3e		443					Ech1	Bcr	Tnfaip2	Atp6v0e
444	Scg3	Gm47071	Dnajb1		Myo5c	Ccl7	X4931406P16Rik	Adgre4		444					Tsc22d3	Rabac1	Calcrl	Tpm4
445	Slc25a44	Adamts6	Smarca2		Hmgcs2	S100a6	Palmd	Arhgdib		445					Hspa9	Eif3k	Lrrfip1	Picalm
446	Amigo3	Pls1	Eda		Gm28062	Ifi205	Shroom4	Mzb1		446					Lsr	Pfdn5	Smagp	Snx3
447	Nbas	Kcnn2	Mpp2		Osgin1	Egfl6	Hba-a1	Slc15a3		447					Jup	Gfpt2	Hnrnpa0	Adgre1
448	C330027C09Rik	X1700086L19Rik	Lca5		Lif	Apod	Tmc8	Enthd1		448					Cgn	Klf6	Ptp4a3	Tnfaip8
449	Yipf2	Tbc1d22a	Ldlrad3		Hsd11b2	L1td1	Hoxaas3	Ptpn22		449					Rras	Trem2	Kdm6b	Zfp36l2
450	Mia3	Fam89a	G630016G05Rik		Snhg17	Cyp2j9	Atg9b	Naip6		450					Tkt	Itgb1	Dysf	Cfp
451	Tmem184a	Fam172a	4732463B04Rik		Pcna.ps2	Hmgcs2	Pear1	Ermap		451					Tmem59	Nedd4	Ran	Lipa
452	Lyve1	Ralgapa2	Calb1		X2410018L13Rik	Slc6a4	Efna1	Clec9a		452					Rps27rt	Snrpb	Anxa5	Rps27l
453	Rtl5	Tnnt1	Exoc6		Cxcl17	Pla2r1	Ntf3	Fgd3		453					Amotl2	Cyba	Tmbim6	Hpgds
454	Sh3pxd2a	Setbp1	Nbl1		Lrrc48	Nox4	Tspan4	Bank1		454					Rbm3	Cst3	Lrrc8c	Arl6ip1
455	Kcna2	Ccdc39	Efcc1		Shank2	Tbx3	Cyp4b1	Slc11a1		455					Arl6ip5	Sbsn	Thbd	Ptpn1
456	Itga2	Ngfrap1	Golim4		Flrt3	Anxa1	Hoxb4	AI607873		456					Tonsl	Eef1b2	Nkx2-3	Cadm1
457	Sec11c	Camk2d	Cdk14		A730046J19Rik	Gpr153	Gm15050	Fyb		457					Ppp2ca	Cd63	Sept7	Aldoa
458	Ina	Asxl1	Adgb		Large	Ccl2	Cachd1	1700097N02Rik		458					Klf4	Lamc1	Sox7	Cd40
459	Fancf	Pitpnm2	Grb14		Atp10d	Aif1l	Pik3c2b	Cd40		459					Hnf1b	Gbp2	Rps15a
460	Dusp23	Fam81a	1600010M07Rik		Col18a1	Kcnj8	Hoxb6	Hal		460					Rab27b	Sqstm1	Itga6
461	Cyb5b	Arhgap32	Pld3		Rps6ka1	Atp6v0a4	Rhoj	Cd3g		461					Rps13	Arf1	Rpl35a
462	D630024D03Rik	Krtap17-1	Cep41		Gpm6b	Itga11	Hilpda	Tns4		462					Bnip3l	Klf9	F11r
463	Diras2	Hsbp1l1	St8sia3		Fut2	Lgi3	Stard8	Tnfrsf1b		463					Tpm3	Tapbp	Ywhaz
464	Hsf4	Xylt1	Smco4		Cbx2	Stra6	Neurl3	Amz1		464					Nfkbiz	Hn1	Flt4
465	Gga2	Usp29	Pkia		Cldn3	Trpc6	Smad7	Cysltr1		465					2210010C04Rik	Pcsk6	Meox1
466	Uap1l1	Rnf138rt1	Hspa1a		Vdac3-ps1	Rbp1	Ifitm10	Casp1		466					Nedd4	Rhoj	Fli1
467	Cln6	Tox	Epb41l4a		Notch2	Cxcl14	Ceacam1	Arhgap25		467					Fam134b	Atp5o	Rpl23a
468	Ociad2	Robo2	Dnase2a		P2ry2	C7	Fam212a	Xlr		468					Zfos1	Eif3e	Rab11a
469	Slc25a29	Fchsd2	Ccdc136		Trank1	Fam26e	Gm12002	AU020206		469					Gnb1	Cstb	Pttg1ip
470	Whrn	Rpl36a-ps1	Lnx1		Cryab	Adcyap1r1	Hoxb3	C130050O18Rik		470					Arf6	Tnfaip6	Rps13
471	Klhl32	Adora2a	Tubb2b		Pglyrp1	Rgs5	Cmtm3	Gm26740		471					Mal2	Snhg18	Klf6
472	Ppat	Nr3c2	Gldc		Tns1	C2	Trim30d	Gm29282		472					Gata6	Tmem176b	Ralb
473	Uba5	Spats2	Frk		Gm26908	Il1rapl1	Unc5b	Hcst		473					Pah	Rbm3	Tapbp
474	Gm2447	Glrb	Nectin2		Fgd3	Col12a1	Rftn1	Nkg7		474					Ppp1ca	Arf4	Fyn
475	Epb41l3	Dixdc1	Wdr49		Slc12a8	Pkhd1l1	X1700025G04Rik	Ccdc88b		475					Eif5a	Tubb4b	Dnajb6
476	Ptges	Sox5	Kcnh8		Adamtsl4	Cks1brt	Lgals9	Mgst2		476					Laptm4a	Clic4	Arhgef7
477	Tmem248	Gm21887	Smarca1		Als2cl	Adamts8	Cx3cl1	Tmem150b		477					Tpm3-rs7	Pnrc1	Insr
478	Pag1	Mpv17l	Dbp		X1810055G02Rik	Cxcl1	Ifit2	Ifng		478					Rps10	Gm13305	Rpl22
479	Dgke	Eppk1	Syne1		Nr5a2	Gm15551	Notch1	Wdfy4		479					Plec	Serpine2	Klf3
480	Uggt1	Sik1	Ccdc88c		Gm12942	Acsbg1	Plekho2	Tm6sf1		480					Anp32b	Sfrp2	Lrrc8a
481	Cyfip2	Mat1a	Pde7b		Rab32	Nbl1	Ar	Galnt6		481					Eif2s2	Pkm	S100a6
482	Nectin3	Zfp395	Clmn		Pld2	Mst1r	Rcsd1	Adcy7		482					Ergic3	Cyb5r3	Gpx1
483	Hepacam2	Zdhhc14	Stox1		Slc22a18	Hoxb5os	Clic5	Slfn4		483					Srrm2	Atox1	Capzb
484	Cyp2u1	Magi2	Rbms3		Lynx1	Kif7	Gchfr	Serpinb8		484					Nfe2l2	Metrnl	Hnrnpk
485	Ttc28	Gadd45b	Tcp11		Usp43	Angptl4	Mamstr	Pglyrp1		485					Slc6a6	Gnb2	Slc25a5
486	mt-Nd3	Samd14	Neurl1a		Fxyd1	Matn4	Nid1	Kcnj10		486					Rpl19	Prdx5	Rps25
487	Dnajb11	Tubb4a	Slc4a3		6330408A02Rik	Ptn	Fas	Gm14221		487					Rela	Adgrd1	Slco2a1
488	Gm45716	Naaladl2	Gfra1		Ces2g	Prdm8	Slfn2	Lst1		488					Itgb1	Fermt2	Exoc3l2
489	Clptm1l	Gm1673	Ddhd1		Snhg5	Lypd8	Gbp2	Adap1		489					Ywhah	Npc2	Efna1
490	Gng4	Npc2	Rora		Gm26764	Tslp	Boc	Nccrp1		490					Atp5d	Atp5d	Pitpna
491	Gm45307	Gm561	Runx1t1		Dhrs3	Mmp17	Rhoc	Rasa4		491					Cfl1	Zfp36	Endod1
492	Gm47392	Cd36	3222401L13Rik		Smo	Gm684	Arhgap27os1	Plxnc1		492					Smagp	Glo1	Csrp2
493	Limch1	Ptk2b	Gnb4		Tgif2	4833422C13Rik	Emp2	Gm13822		493					Ctsb	S1pr3	Mapre1
494	Abat	Rab40b	Epcam		Blnk	Gm10605	Gm43573	Lpxn		494					Wdr89	Zyx	8430408G22Rik
495	Zfp991	Nalcn	Isl1		Slc26a1	9430020K01Rik	Gm13889	Prtn3		495					Emp2	C1ra	Shisa5
496	mt-Nd2	Ppp4r4	Zfp467		Rhbdf1	Spon1	Cav1	Zeb2		496					Myadm	Ech1	Rpl27a
497	Gm16006	Airn	Ston2		Wbscr27	Ildr2	Ebf1	Gm5086		497					Eif4g2	Bsg	BC028528
498	1810008I18Rik	Cmss1	Swt1		Fam166b	Timp1	Nfib	A530032D15Rik		498					Rhou	Gabarap	Tprgl
499	Oprm1	Sik2	Dsp		Anxa3	Flrt2	Ehbp1l1	Smim3		499					Tbca	Mat2a	Bcam
500	Sstr3	Slc7a8	Zfp365		Adgrg2	Gm16118	Gjc1	Sp110		500					Sumo2	Pdlim4	Chst15
501	Bdh1	Csgalnact1	Fermt1		Shisa4	Tbx2	Gbp9	Tagap		501					Clps	Ar	Rpl26
502	Cc2d2b	Gm47283	Igsf9b		Gulo	Colec11	Gbp5	Arhgap4		502					Eif4h	Gm10076	Scarb1
503	Phyhip	Ephx4	Eif4e3		Erich2	Asb2	Stard9	Tbxas1		503					Arpp19	Esam	Emp2
504	Them6	Ugt2b34	Stk32a		Fstl3	2310010G23Rik	Rnf144b	B4galnt1		504					Comt	Efhd1	Degs1
505	Gm15417	Nynrin	Serinc2		Setd8	Fbln7	Clec2d	Cd4		505					Tpi1	Btg1	Trp53i11
506	Pdia6	Nbdy	Perp		Cxcl5	Palm2	Zfp423	Gm29340		506					Fkbp4	Bag1	Srrm2
507	Mboat2	Tmem131l	Npnt		Mmp11	Foxc2	B4galt4	Mcoln2		507					Psme1	Sept4	Ccnl1
508	Gm30648	Iqsec1	Tspan12		Gm7694	Wnt5a	Ankrd29	Ptpn18		508					Erh	Ran	Cdk17
509	Mettl7a1	Dynlt1b	Amigo2		Dsg2	Kcnt2	Prss23	Ifi30		509					Eif5	Itm2a	Pdlim5
510	Tnfrsf9	Aatk	Bhlhb9		Igsf3	Tcap	Kcnk6	Iqgap3		510					Rab14	Pmepa1	Zfhx3
511	Inpp5j	Mbd5	Fez1		Flnc	Ptgir	Sash1	Irf8		511					Hnrnpa0	Gm11808	Clec2d
512	Dnajb9	Kcnk2	Mrps6		Plpp2	Gm15337	P2ry2	Gpr35		512					Agrn	Sulf1	Rpl5
513	Creld2	Xist	Jam2		Etv4	Gjc1	Cngb1	Icos		513					Wfdc15b	Ehd2	Rpl39
514	Rec8	Slc39a14	Hnf4a		Soat2	Slc16a1	Fxyd5	Samsn1		514					Sparc	Dynlrb1	Purb
515	Myo3a	Camk4	Rfx6		Eno1b	G0s2	Foxc1	Bend6		515					Rpl11	Cd200	Mapk3
516	Atp4a	Tenm2	Cfap77		Gprc5a	Crip1	Hba-a2	Ly6c2		516					Eif4b	Flna	Pnp
517	Pi4k2a	Zfp704	Klc3		Zfp185	Tmeff2	Inf2	Cmklr1		517					Chmp2b	Litaf	Xiap
518	3110070M22Rik	Gm26883	Hsph1		Dbi	Lsp1	Smtn	Cd19		518					Selk	Tmbim6	Tmem2
519	C030014I23Rik	Dab1	Fxyd3		Trim47	B3gnt7	Jdp2	Plau		519					Atox1	Mrpl33	Rai14
520	Emb	Snap91	Tceal3		Rpl36.ps3	Vim	Sh2d4b	Ch25h		520					Ywhaz	Hnrnpk	Fbxl7
521	Tbc1d24	Npas4	Kctd16		Galk1	Alkal2	Cdiptos	Cfp		521					Rac1	Hnrnpf	Tmem140
522	Gosr2	Slc24a5	Rgs17		Hes1	Olfml3	Jam2	A630001G21Rik		522					Uqcrh	Uap1	Raly
523	Nol3	Prex1	Prkcg		Fam131c	Emp3	Bcl6b	Gm43936		523					Ifngr1	Prrx1	Tspan9
524	Sec61a1	Tmlhe	Man2a1		Scube3	Nov	Isg15	Gpsm3		524					Cox6a1	C1rb	Jup
525	Derl1	Maoa	Gprc5a		BC034090	Krt79	Msrb3	Ctsh		525					Prdx2	Tmem119	Rpl37
526	Dlg3	Jade3	Gtdc1		Nfib	Sdpr	Adm	Batf		526					Psmd8	Sdc2	Trib1
527	Irs1	Cep112	Ptpn13		Espn	Gpm6b	Ackr3	A630033H20Rik		527					Midn	Raly	Lmcd1
528	Ccdc6	Gata6	Lefty1		Vwa7	Fkbp10	Hic1	Ptger4		528					Zbtb20	Serbp1	Nus1
529	Smim1	Rab27b	Hdc		Btbd8	Tiam2	Nkd2	Ifi213		529					Pvr	Cdkn1a	Nav1
530	Akap6	6430573F11Rik	Eya1		Col4a5	Hoxb6	Meox2	Cyba		530					Sdcbp	Pdlim2	Tnfsf10
531	Shisa2	Vgf	Thrb		Oplah	Lif	Csf3	RP24-330M21.1		531					Nudc	Ndufa3	Sumo2
532	Bpnt1	Svop	Rnf138rt1		Fblim1	Myom3	Fut2	Ifi204		532					Nhp2l1	Adamts2	Rack1
533	E2f1	Prox1	Cep112		4930415O20Rik	Bmp7	Fam71f2	Ptpro		533					Lamp2	Tnfrsf1a	Fzd4
534	Vsig8	Thrb	Ttc3		Cgnl1	Ecm2	Trim47	Klrb1a		534					Plp2	Hspa1a	Rbpms
535	Gnmt	RP23-60P18.10	Myo1e		Gm10083	Cryab	Nedd9	H2.Q5		535					Rbm47	Gltscr2	Cyba
536	Tmem150c	Herc3	Fbp1		Il1rn	Ar	Mecom	Slfn2		536					Rnaset2a	Mdh2	Psma7
537	Ddit3	Sh3bp4	Dock6		Creb3l4	1700003F12Rik	Serpine1	Lsp1		537					Tm9sf3	Pdia3	H2-Q4
538	Atp6v1e1	Nedd4l	Pde3a		Ranbp3l	Steap4	Igfbp7	Clec2g		538					Hn1	Cox6b1	Lamb1
539	Hdlbp	1810032O08Rik	Trib2		Ly6f	Pcdh7	Ptprg	Il16		539					Brd2	Serinc3	Ptpre
540	Gnpda1	Basp1	Slc8a1		Mfsd7a	Plekhf1	Ifi213	Nrros		540					Cdc37	Anapc11	Tns1
541	Prune2	D16Ertd472e	Dapk1		Gdpd5	Raver2	Dok4	Rassf2		541					Mapk3	Rpl36al	Capns1
542	Rptoros	Rps6kl1	Ctso		Cxcl16	Ngf	Foxc2	H2.Q7		542					Dag1	Ncl	Cmip
543	Manf	Mical3	Nefm		Ltbp2	Apol9b	Abcb1a	Txk		543					Thbs1	Scara5	Rpl32
544	Mtss1l	Mpp2	Fat1		Kifc3	Aqp5	Sept4	Ifi205		544					Cd151	Ndrg2	Aldoa
545	Sqor	Neo1	Lhfpl2		Acot1	Gm34342	Dhrs3	Dok2		545					Arl6ip1	Cadm3	Rplp0
546	5530401A14Rik	Cers6	Ahi1		Lurap1l	Ptgs2	Tmigd1	Ifi206		546					Fbln2	Ddr2	Tmem59
547	Exph5	Gcnt2	Nostrin		Myof	Nr2f2	Lamb2	Ifi211		547					Chmp4b	Sepp1	Gas6
548	Tmem255a	Gm10036	Tmtc2		Dennd1c	Apol9a	Ppm1f	Zbp1		548					Nr1d1	Nedd8	Clic5
549	Slc35e1	Serp2	Adgrl2		Angpt1	Fgf1	Tmem136	Epsti1		549					Basp1	Pdpn	Dhrs3
550	Cyb561d1	Vps37d	Ccdc82		Gm37276	Thbs2	Edn1	Trf		550					Selenbp1	Dstn	Cd9
551	Fam174b	Pdgfrl	Plcb4		Gm5786	Htr1b	Tnfsfm13	Adap2		551					2700060E02Rik	Gpi1	Cyb5a
552	Wars	Cd59a	Prickle2		Gm6576	Gm11744	Itga5	Blnk		552					Grn	Tubb2a	Tpst2
553	Mthfd1	Hdac8	Pbxip1		Pard6b	Meox2	Mdfic	Alox5ap		553					Cox7a2l	Tprgl	Swap70
554	Fam19a5	Wee1	Abca5		Mal2	Gm13889	Pdgfd	Cxcl16		554					Itga3	Rpl22l1	Tmem50a
555	Tln2	Rps3a1	Pik3c2g		X2310030G06Rik	Adamts15	Ccnjl	Cd28		555					Csrnp1	Calu	Entpd1
556	Hist2h3c1	Asb4	Magi3		Pvr	Trpc3	Ism1	Asb2		556					BC029214	Lrrn4cl	Piezo2
557	Pkdcc	Tshz3	Slc35g2		Itgb6	Lynx1	Spns2	Rubcnl		557					Mif	H3f3a	Rplp2
558	Trp53inp2	Spint2	Fev		Gm13154	Bcat1	Tmem2	Ccrl2		558					Oaz1	Dpysl2	Ifi203
559	Gmpr	1700040D17Rik	Usp11		Gm17087	Gucy1b3	Lats2	Lgmn		559					Chp1	Ctsd	Pitpnc1
560	Gdap2	Pcsk2	Tshz2		X1110008L16Rik	Hoxc6	Gpr146	Gbp2b		560					Cebpb	Steap3	Cmtm8
561	Neurod1	Kl	Dnaja4		Itga3	Sema3b	Pla2r1	Acap1		561					Icam1	Akr1b8	Pltp
562	Cmbl	Gm10399	Trp53i11		D7Ertd443e	Akr1b8	Ces2g	Cyp27a1		562					Hint1	Zfp385a	Psmb3
563	C2cd2l	Wbscr27	Rfx3		X2410006H16Rik	Smtn	1810011O10Rik	Cacna1f		563					Pamr1	Wt1	Serf2
564	Rpusd1	Farp1	Ptprt		X2810004N23Rik	Nkx6-2	Kcnj8	Spib		564					Ifitm2	Oaz2	S100a10
565	Slc33a1	Abhd14a	Fhl2		Gm6625	Timp2	Synpo	Ndnf		565					B4galt6	Ndufa13	Chmp4b
566	Prob1	Gab2	Itpr1		Kcnq1	Nrgn	Lrrc8a	Itk		566					Atxn7l3b	Pttg1ip	Slc23a2
567	Glul	Prdx4	Atp1b2		F2rl1	Tulp1	Il4ra	Adap2os		567					Eif3e	Nfib	Ptpn12
568	Cbs	Zdbf2	Kcnmb2		Zbtb9	Sulf2	Sorbs3	Ncaph		568					Gm10073	Rnaset2a	Rab5c
569	Foxo6	Gm15800	E130307A14Rik		Rpl9.ps1	Vegfd	Sh2b3	Cxcl14		569					Tecr	Celf2	Ccser2
570	Mfsd13a	Stx1a	Zdbf2		Wbscr25	Fbln5	Slc52a3	Cebpa		570					Gnb2	Arhgdib	Ddx3x
571	Gale	Exoc4	Frzb		Slc51a	Draxin	Spaar	Oasl1		571					Tmem234	Lamp2	Syne1
572	Tssc4	1600010M07Rik	Pbx3		Rab44	Slc1a6	Mcm3	Kcnab2		572					Hpn	Sncg	Fam167b
573	Shc4	Map2k4	Rnf217		Glipr2	Csrp2	Cxcl12	Fam49a		573					Cers2	Filip1l	Pcbp2
574	Hist2h4	Tmem194	Hnf1aos1		Gm9755	Ackr3	Procr	Igkc		574					Rbms3	Ppp1ca	Kctd12
575	Srm	Shank1	Gm1673		Pxmp2	Dpysl3	Hk1	Serpina3g		575					Slc35f5	Vasn	Zcchc6
576	Pla2g2f	Rpl9-ps6	Snrpn		Hr	Gli3	Fez2	Pqlc3		576					Cox6b1	Phlda3	Pkm
577	Gm5113	Tpk1	Crmp1		Tpbg	Hk2	Mapk11	Fmnl1		577					Gm9843	Prkar1a	Pdgfa
578	Tmem65	Auts2	Spint1		Mia	Hr	Ptgir	Ticam2		578					Tubb4b	Col5a2	Arf4
579	Disp2	Ppp3cc	2610020C07Rik		Amotl2	Tm4sf5	Sp100	Gpr183		579					Cxcl1	Ckb	Rps10
580	Plpp5	Rgs7bp	Nrip1		Gna14	Rasl11b	Crip2	1700047M11Rik		580					Cpa1	Hsbp1	Rell1
581	Slc2a13	Specc1	Pax6os1		Tenm1	Lsamp	A4galt	Oas3		581					Eps8l2	Cdk2ap2	Prex2
582	Glrx	Ptprn2	Zc3h12b		Sftpd	Loxl3	Syde1	Gm26520		582					Edn1	Ccnd3	Pdgfb
583	Zfp729a	Mapk15	Tec		Gm43915	Hmcn2	Lfng	Plxna4os1		583					Trim28	Fbln5	Ehd2
584	Tram1	Park2	Sema3c		Slc25a24	Nkain2	Gm9968	1700020L24Rik		584					S100a1	Chmp4b	Pls3
585	Dennd4c	Rpl13a	Gucy1b1		Gm42678	Ebf1	Arap2	C1qa		585					Prelid1	Akr1a1	Ifi27
586	B3galt4	Prdm10	Arid5b		Cd44	Adap2os	Stk32c	Dnaaf3		586					Eif5b	Art3	Rpl29
587	Sirpa	Sesn1	Prox1os		Srcin1	Ccdc3	Scarb1	Il27ra		587					Purb	Slc25a5	Ppib
588	Selenot	Gm26724	Olfml3		Nfix	Ednra	Sema6d	Gdf3		588					Sema6a	Smtn	Hnrnpa2b1
589	Flrt1	Gm9493	Pak3		Tpm3-rs7	Ano1	Itpripl2	Pik3cg		589					Crip1	Ano1	Kctd10
590	Cep290	3110082I17Rik	Zfp612		X2410016O06Rik	Mxra8	Rin3	Stat4		590					Fkbp8	Nfix	Arl6ip5
591	Fam135b	Exoc6	Jun		X2610044O15Rik8	Ackr2	Rras	Def6		591					Bzw1	Ube2d3	Shank3
592	E530001K10Rik	Slc16a11	Baiap2l1		Cebpa	Hic1	9430020K01Rik	Dennd1c		592					Sri	Pdlim1	Rrbp1
593	Reep6	Pawr	Basp1		Iffo2	Insc	Col4a4	Gna15		593					Vmp1	Pdgfa	Lrrc58
594	Kcnq4	Mast4	5330439M10Rik		Ceacam2	Col16a1	Bcar3	Ccl7		594					Aldh2	Emilin2	Hivep2
595	Gm14327	Zcchc18	Sesn1		Fam63a	Gja4	Eml1	Hs3st3a1		595					Gja1	Ehd1	Efnb2
596	Rtl6	Plekhg1	Gc		Adap1	Adgrg2	Tns1	Adam8		596					4930523C07Rik	Cebpd	Tmem88
597	Tbc1d22b	Arntl	Clcn5		Urah	Smtnl2	A330009N23Rik	Chil1		597					Polr2f	Fus	Cox4i1
598	Edem2	Lgals3bp	Ass1		Ttll8	Adamts16	Kcnj2	Stk17b		598					Sept9	Prelp	Plin2
599	Slc7a5	Lpin2	Naxe		Fam132a	Cercam	Epha2	Siglec1		599					Trip6	Ndufa4	Pcp4l1
600	Otub2	Necab2	Rtn1		Rps2.ps6	Slc39a8	Il15	Cd2		600					Tesc	Use1	Ece1
601	Npepl1	Spink4	Ptprm		Slc6a9	Nkd2	Fam43a	Slc7a11		601					Laptm4b	Pcbp2	Dnajc8
602	Ints5.1	Pla2g12a	Kcnip1		1600002H07Rik	X1810055G02Rik	Kif26b	Rasgrp1		602					Elf3	Ppic	Rpl35
603	Slc12a7	Nr6a1	Lmo7		Ccdc120	Il1rl2	Fes	H2.T10		603					Cttn	Bri3	Nes
604	Blcap	Gm28285	Bex1		C1ql3	Sh3pxd2b	Phldb1	Mx1		604					Cct4	Atg3	Rapgef1
605	Selenos	Frmpd4	Ppp2r3a		Mettl20	Adap2	Spry1	Cd22		605					Tjp2	Cnn3	Dennd5b
606	Ggact	Snx18	Meis2		Gstt3	1700112E06Rik	Ripor2	Atp1a3		606					Tuft1	March2	Wsb1
607	Magt1	Rpl13-ps3	App		Lmo4	6030408B16Rik	Apol10b	Ltb		607					Ubxn1	Dbn1	Wwc2
608	Kctd7	Ephb2	Fbxo30		Slc25a45	Serpina3n	Cgnl1	Adam19		608					Ctsd	Skap2	Pdgfd
609	Helq	Rps10	Ctnnd2		Itpripl1	Nid1	Hmcn1	Gpr18		609					Hnrnpa2b1	Ppp1r15a	Sncg
610	Slc7a4	Serpine2	Dennd4a		Gm15912	Igsf10	Tbx3	Itga4		610					Zfp706	Sfr1	Tpm1
611	Srp54a	D230025D16Rik	Il11ra1		Smad3	Cpxm2	Ltbp1	Fxyd5		611					Camk1	Csf1	Asap1
612	Tle3	Rpl13	Npas3		X9430038I01Rik	Ppm1n	Adgre5	Il2rg		612					Anp32a	Cnn2	Pqlc1
613	Zfp92	Rims2	Xrcc4		Pdlim4	Gm15050	Orai1	Runx1		613					Agpat2	Svbp	Nfkb1
614	Abracl	Mgat5	Hspe1		Tgfb2	Mylk3	Pros1	Arg2		614					Rpl36al	Rpl9-ps6	Iqgap1
615	Sult1c2	Isyna1	AC149090.1		Gm15594	Mettl20	Cttnbp2nl	Il4i1		615					Sypl	Rrbp1	Csnk1a1
616	Rfk	Ppp1r9a	Hsp90aa1		Rnf39	Cyp27a1	Dram1	Insl6		616					Ywhab	Sptssa	Pabpc1
617	Mthfd2	Stx16	Atxn7l1		Rab17	Fgf11	Cdkn1a	Mag		617					Morf4l1	Ldhb	Jam3
618	Pycr2	Mpped2	Lrpap1		Dab1	Amhr2	Tbx2	Fndc7		618					Prdx6	AW112010	Adam15
619	Zfp346	Pddc1	Ccdc107		2410016O06Rik	Ackr4	Rasl11a	Car13		619					Kcnk1	Rpl30	Cflar
620	Kat14	Gpr137b	Hspa4l		Sardh	Spink2	Caskin2	Lat		620					Map1lc3a	2700060E02Rik	G3bp1
621	Ccdc167	Slc16a10	Frmd4a		Csrp2bp	Pcdh20	Csgalnact1	Tk1		621					Phb2	Angptl2	Nid2
622	Slc25a1	Amt	Meis1		Pigr	Cav1	Anxa3	Aurkb		622					Sepp1	Zbtb20	Mndal
623	Pycr1	Rpl35a	Prdx4		Tyro3	Zfp57	Heph	Hexb		623					Tapbp	Plac8	Vat1
624	Abhd15	Man2a1	Fam155a		Efhd1	Antxr2	Rftn2	Icosl		624					Wsb1	Gja4	Nop53
625	Entpd7	Btrc	Man1c1		ago.01	Dnm1	Gm20467	Tbc1d10c		625					Erdr1	Ywhae	Psmd7
626	Itpkb	Pacrg	Tgif1		Aim1l	Plod2	Ctnna3	4833407H14Rik		626					Son	Gdi2	Lgals9
627	Mlec	1700025G04Rik	Zdhhc14		Krt15	Adam11	Arhgap29	Runx2os1		627					Chchd2	Txndc5	Sypl
628	Dnajc3	Kif21a	Dzip3		Gm2174	Gstm6	Gm26510	Lrch4		628					Stard10	Sri	Amotl1
629	Asah1	Rps24	Psd3		Bmf	Rasl11a	Dapk2	Lyn		629					Prdx5	Cox7a2l	Thrsp
630	Chst11	Gm17491	Sh3d19		Anxa2	Nxnl2	Slc44a2	Apobr		630					Mrpl52	Eno1	Plxnd1
631	D630039A03Rik	Mum1l1	Gpx1		Slc52a3	Tmem136	Cav2	Gm8369		631					Ptprf	Gstm5	Hnrnpab
632	Zfp518b	Zfp365	Chp1		D130051D11Rik	Hmcn1	Sipa1	Tm4sf5		632					Vcam1	Mprip	Anp32a
633	Tbccd1	Smim24	Ppp1r9a		Arhgef10l	Galnt17	Ecm2	Klhl6		633					Polr1d	Vtn	Ube2s
634	Zdhhc3	Mdk	Dio1		Rps12.ps3	Ccdc102a	Als2cl	Mb21d1		634					Klf3	Medag	Txnip
635	C2cd4c	Myeov2	Asap1		Rhov	Plxdc1	Trib2	Trpv2		635					Clk1	Gstt1	Atp5b
636	Dusp18	Gpr179	Ccdc162		Fam175a	Ssc5d	Endod1	Uhrf1		636					Ube2e3	Npdc1	Fam43a
637	4930515G01Rik	Dact3	Dnaja1		sep.08	Gpsm3	Fam124a	Pik3cd		637					2900026A02Rik	Impdh2	Sema4c
638	AI463170	D930015E06Rik	Gata6		Erdr1	Carmn	Muc13	Lfng		638					Pdlim4	Upk1b	Spry4
639	Gm16861	Stard5	Samd12		Megf6	Aldh1a1	Tcaf2	Pmaip1		639					Nono	Ost4	Cox6a1
640	Nt5c3	Mtfp1	Grik2		X2900026A02Rik	Gucy1a1	Dmtn	Rapsn		640					Notch2	Rps12-ps3	Tax1bp3
641	Clip4	Usp11	Ptprg		Vash2	Lgi4	Tgfbr2	Abca9		641					Sgms2	Arl6ip5	Ptp4a2
642	Reps2	Rai2	Magi1		Adck3	Mnd1	Kremen2	Fxyd2		642					Slc9a3r1	Loxl2	Nfat5
643	Mroh7	Samd4	Mapk10		Ints5	Lpar1	Sncg	Gpr137b.ps		643					Serf2	Pltp	Synpo
644	Pnpo	Glud1	Foxp1		Agpat9	Bcas1	Hbegf	Ccnf		644					Pmepa1	Fxyd5	Prdm1
645	Endog	Gm20275	Cacna1a		Gm16519	C1qtnf3	Hip1	Antxr2		645					Rps12.ps3	Itih5	Cpne8
646	Arfgef3	Zbtb7c	Zbtb20		Gm37469	Hoxb2	Egr3	Tmem119		646					Hnrnpu	Tnfrsf12a	Klf9
647	Hspa5	Wars2	Dlg1		Rpl7a-ps3	Ccl8	Smpdl3a	Sp100		647					Pcbp1	Apold1	Camk1
648	Sertad4	Nlgn2	Gm28285		4930432K21Rik	Cdh12	Tmem140	Gm20703		648					Lima1	Fgfr1	Rpl14
649	Slc38a10	Wwc1	Vat1l		1700001O22Rik	Ppfibp2	Pde4b	Akna		649					Myc	Fkbp8	Coq10b
650	Isg20	Fgl2	Nr3c2		Epha1	Fcgrt	Sox11	Dok3		650					Adamts1	Mrpl52	Psme2
651	Scly	Ptpn14	Etv1		Dcdc2a	Lrig3	Mef2c	Gm16685		651					Prr13	Tcf4	Pmp22
652	Abcb10	Nhlrc2	Ctsh		Pdpn	Gm10369	Mfge8	Kcnk6		652					Edf1	Arhgap29	Rtp4
653	Srpr	Usp53	Pgrmc1		X1700037H04Rik	Adm	Plod1	F10		653					Pafah1b3	Ssr3	Slk
654	Mcc	Wdr49	Usp29		Tinagl1	Mmp11	Neurl1b	Fes		654					Nol7	Nfia	Rnf213
655	Elf3	Ksr2	Rcn2		St14	Trf	Prag1	Tcirg1		655					Higd2a	Psme1	Tspan13
656	Tspyl4	1500011B03Rik	Pde10a		Fndc4	Pappa	Litaf	Mmp14		656					Chchd10	Cd7	Pafah1b1
657	Gfpt1	Pbx1	Ptprk		Pzp	Bhlhe22	Rad51ap1	Il27		657					Card10	Atp5j2	Rapgef4
658	Glce	Ube2e2	Palld		X9130221H12Rik	Procr	Igf2	Unc93b1		658					Wbp5	Clta	Atf3
659	Acss2	Rpl27a	Dach1		Mfge8	Glipr2	Samsn1	Slco2b1		659					Palld	Slc43a3	Arhgef12
660	Coro2b	Rps15a	Atp1b1		Hn1	Lin7a	Arhgap10	Fam64a		660					Snx7	Shisa5	Myo1c
661	Bag2	Dnajb1	Znrf3		Qtrtd1	Fcor	Bnip2	Isg15		661					Esd	Mcl1	Ushbp1
662	Tmed9	Rcn1	Trim2		Gm20478	Scd1	Grasp	Spdl1		662					Use1	Srsf3	Ppic
663	Pofut2	Glis1	Khdrbs3		Npff	Espn	Lpar6	Gm10634		663					Rbms1	Hnrnpa2b1	Lpar6
664	Gnaz	A330069E16Rik	Srgap3		Peo1	Serping1	Bmp4	Metrnl		664					Cela1	Sh3bgrl3	Sept4
665	Zfp667	Plag1	Cplx2		Stap2	Slit3	Adam15	Rhof		665					Arhgdia	Mlf2	Midn
666	Isoc2b	Baiap2l1	Zcchc11		Gas5	Trem2	Cnn2	Hpgd		666					Snrpe	Tpst1	Vcp
667	Gm7160	Ikbip	Cacnb2		Gm8394	Cyp2s1	Pmaip1	Plac8		667					Capzb	Gabarapl1	Slc25a3
668	Sytl1	Celf2	Wwox		5730508B09Rik	Hoxb7	Ldha	Kmo		668					Atp5j	Lpar1	Crk
669	Zfp968	Gpr85	1700001C02Rik		Ccbl1	Sept4	Plau	Arhgap19		669					Spr	Psme2	Picalm
670	Esyt1	Xkr6	Cbfa2t2		Capn6	Tpbgl	Slco2a1	Slc29a3		670					Zfand5	Hspb8	Ccnd1
671	Rusc1	Mid1	Ssbp2		Acot10	Tpbg	Sbno2	Gm13710		671					Rab11b	Ndufa2	Ube2i
672	Hmgcr	Rpl34	Hmgn3		Schip1.1	Cd34	Atoh8	Espl1		672					Pttg1ip	Ilk	Reep3
673	Cd164	Ccdc109b	Hspd1		Ept1	P2rx1	Col25a1	Zc3h12a		673					Mllt4	Sntb2	Unc45b
674	Cebpd	E130309D14Rik	Sdhaf4		Fxyd7	Maf	Rgs5	Emilin2		674					G3bp1	Myadm	Anxa7
675	Hist1h2bc	Gm6483	Slc6a6		Gm13305	Gstp2	Trpc3	Kctd14		675					Pld1	Rgs4	Parvb
676	Pax6os1	Triqk	St18		Gm13225	6030419C18Rik	Plekhg2	Emp3		676					Slc38a2	Capg	Sbno2
677	Uso1	Wwox	Abcc8		2010107G23Rik	Calml4	Rbms1	Hk2		677					Ptp4a2	Tmed2	Chic2
678	Nudt7	2310033P09Rik	H2afv		Tspo2	Hoxa3	Hspa12b	Kif21b		678					St3gal5	Ctsc	Mbd2
679	Gm39317	2700029M09Rik	Tpm1		Cldn23	Gpx7	Bhlhe40	Tespa1		679					Gstp1	Bnip3l	Gnas
680	Slc25a35	Cenpp	Dennd1a		X1110008F13Rik	Sepn1	Rilp	Sh3bp2		680					Cbx3	Ap2m1	Bnip3l
681	Tsga10	Rnf180	Gatm		Rin3	Paqr6	Meox1	Rab32		681					Irf2bpl	Grem2	Serpinb6a
682	Slc37a4	Sepn1	Ssh2		Ftsj2	Plxdc2	Fyn	Lacc1		682					Hnrnpc	Vimp	Fgd5
683	Fh1	Nav2	Resp18		Actn1	Hoxaas3	Cpxm2	Pclaf		683					Dynll2	Plin2	Pdlim7
684	Pard3	Rpl11	Tpk1		Prodh	Gng11	Pcsk5	H2-Q7		684					Emc6	Cox8a	Calu
685	Akr1c13	Eef1b2	S100a10		X2510002D24Rik	Hoxb3os	Hoxb2	Ptgs2		685					Serinc3	Bloc1s1	Clec1a
686	2310074N15Rik	Map3k5	Dlg2		Snx22	Lmx1a	Stx2	Ly6d		686					Hrsp12	Psmb1	Cav2
687	Enpp2	Rpa3	Fbxl7		Phxr4	Sparc	H2-Q6	Areg		687					Vdac2	Atp5a1	Leprot
688	Wls	Dennd1a	Rtp4		Angptl8	Pde9a	Tgfb1i1	Bub1		688					Zmiz1	Sfrp1	Ubb
689	Gm17276	Myef2	Utrn		Rnf144b	Gm9008	Nr4a3	Pim1		689					Fn1	C1qtnf2	Uchl1
690	Tmem56	Pcgf2	Sri		Utp11l	Sntb1	Kcnq1	Cd1d1		690					Plxnb2	Plce1	Calm2
691	6330403L08Rik	Cmtm8	Ank3		X3110082I17Rik	Tfpi2	Spred1	Mki67		691					Nfic	Erh	Ywhah
692	Shc1	Myo9a	Anxa4		Tmem173	Rasgrp2	Snrk	Padi2		692					Rnh1	Ahnak2	Prkar1a
693	Racgap1	St8sia3	Plekhg1		Pla2g4a	Zak	Ccl2	Arhgef6		693					2310036O22Rik	Lrrn4	Vamp3
694	Tmem42	Dusp10	Adamts6		Fchsd1	Serpinh1	Paqr4	Nfkbid		694					Cxcl12	Rab34	Gpi1
695	Zfhx2	Nt5dc2	Cd44		Klhl17	Cox6b2	Gm13056	Lcn2		695					Ndufa13	D8Ertd738e	Tek
696	Rragd	Rpsa	Bex2		Arhgef26	Prss23	Hbb-bt	Zbtb32		696					Ube2i	2810428I15Rik	Slc16a3
697	March9	Sdf4	Gphn		X2310035C23Rik	Impa2	Peak1	Gm5547		697					Mafk	Psmb3	Jak1
698	Dock10	Mbnl2	Mapk4		Ppp1r36	Tcf15	Trim30a	Gas2l3		698					Tmc4	Tsen34	Gstm1
699	Ficd	Rpl30	Stx11		Hnf1b	Pdlim4	2200002D01Rik	Mmp19		699					Fam32a	Rsu1	Spop
700	Rpn1	Gm26733	Prox1		Wbscr16	Ctnna3	Gm16118	Tlr2		700					Pebp1	Nudt4	Ifi35
701	Gm45846	Rps7	Pam		Tst	Ntf3	Adam19	Capn3		701					Tnip1	Tgfbr3	Selenok
702	Arfgap3	Tbcel	Cacybp		Taf4a	Igfbp2	Tfpi2	Dtx4		702					Slc5a1	Pde4b	Ifngr1
703	Klhl8	Jazf1	Tspan5		Hyi	Gbp2b	Fosl2	Srgn		703					Ndufa2	Myl12b	Bag3
704	Ccl28	Wdr89	Pitpnc1		Gm9844	Slc23a3	S100a16	Acss1		704					Cald1	Fis1	Arpc5
705	AI480526	Maml3	Calm2		Acy3	Gucy2g	H2-Q7	Il15		705					Cpne8	Efemp2	Rheb
706	Calr	Rfx7	Rap1gap2		Il7	Afap1l2	Tspan9	Ifi27l2a		706					Ninj1	Arf5	Sf3b1
707	Alg2	Pam	Fosb		Ezr	Fads3	Zfpm1	Mdfic		707					Ranbp1	Acaa2	Slc2a1
708	P4hb	Rgs17	Slc24a2		Cldn4	Cfb	Mmp15	Gngt2		708					Trim47	Col6a3	Pea15a
709	Gm20300	Slc8a1	Jam3		Ephb3	Zfp575	Bmp6	Tnfsf9		709					Tcp1	Sulf2	Ier5l
710	Mctp1	Cep41	Camk2b		Pter	Col18a1	Anxa2	Gm13212		710					Gsta3	Smdt1	Enpp6
711	Trib3	Rps12-ps3	Hist3h2ba		Gm17541	Lamb2	Abcg2	Lipa		711					Sptan1	Calm3	Abca1
712	Tldc1	Rpl9	Magi2		X1110051M20Rik	AI607873	Cysltr1	H2.T22		712					Cct5	Mtch1	Sec14l1
713	Arid3b	Ptpn13	Nalcn		Serpinb1b	Parp3	Bcr	Arl4c		713					C1qbp	Rnf187	Actr3
714	Klf5	Lrch1	Chd6		Cd14	Gli2	Clic4	Inpp5d		714					Ndufa3	Pdlim7	Naca
715	Golga4	Fmn2	Bsg		Fjx1	Ntn1	B2m	Aph1c		715					Phf3	Hes1	Rps17
716	Tat	Ppfibp1	Rabgap1l		Cxcl12	B3gnt8	Pola2	Ifit2		716					Pim1	Nupr1	Neurl3
717	Degs1	Vat1l	Pigp		Fam171a2	Gpc6	Gatsl3	Rftn1		717					Thra	Olfml3	Ndrg1
718	Neil2	Pcyox1l	Egr1		Syt12	Sbsn	Adamts10	St8sia4		718					Snrpd2	Col18a1	Mprip
719	Igsf1	Rps27a	Kcnj3		Rnf122	Kirrel	Ttyh3	Cks2		719					Ndrg1	mt-Nd1	Nos3
720	Dhcr7	Pou5f2	Elavl4		Gm13251	Abca9	Trip10	Cenpa		720					Creb5	Nop10	Map7d1
721	Tnfrsf21	1810026J23Rik	Bex4		Fam73a	Rrad	Eogt	Rab3il1		721					Metap2	Gnai2	Notch4
722	Ssr1	Trp53rkb	Srgap1		X2410002F23Rik	Hrct1	Fbln5	Stab1		722					H2-Q4	Sdcbp	Id4
723	Armc5	Adk	Itgb1		Fam188b	Ptgfrn	Sdpr	Casp4		723					Lpp	Fbln2	Sbds
724	Fbxl16	Snx21	Cirbp		Ddit4l	Adgrf4	Fam171a2	Ckap2l		724					Dek	Rab11b	Hnrnpu
725	Ankrd10	Mkl1	Hspa8		Efhd2	Col8a1	Chek2	Cd36		725					Plk2	Camk1	Cavin1
726	Siah2	Rpl6l	Hs6st3		Arg2	Megf6	Pmp22	Dpys		726					Zfhx3	Ckap4	Sfpq
727	Lhfpl4	Rpl37a	Tusc3		Snta1	Rab7b	Vav3	Trim30a		727					Hnrnph1	Ranbp1	Errfi1
728	Paip2b	Dock4	Nrxn1		Gm18025	Olfml2b	Tmem173	Slc8b1		728					Elovl7	Akap12	Rpl36a
729	Synpr	Rpl36-ps3	Btg2		Rasl2.9	Pmp22	Ifi206	Fcmr		729					Rhoj	Vamp8	D8Ertd738e
730	Nceh1	Magi3	Ucp2		Plaur	Hoxa2	Rest	Cd101		730					Gas5	Rras	H2-T23
731	Slc39a7	Fhl2	Kifc3		Frmd6	Krt19	Plcd1	Capg		731					Tgfb2	Tax1bp3	Hnrnpa1
732	Ampd2	Vsig10	Ncam1		Tlr5	Slc11a1	Mylip	G430095P16Rik		732					Sh2d4a	Tsc22d1	Psma3
733	Lrrfip2	Tmem179	Gm20388		Gm4799	Hacd4	Irf8	Gm10116		733					Zbtb7a	Fuca1	Rps6ka3
734	Surf4	Lefty1	Alcam		Kctd14	Ephb3	Tpbgl	Srpk3		734					Spint1	Ctsz	Parp14
735	Nipal1	Vwa5b2	Cobll1		Lace1	Acy3	Tnfaip1	Birc5		735					Syngr2	Ptp4a2	Procr
736	Rab3a	Itm2b	Olfm1		Ngf	Zfpm2	Sema6b	Olfml3		736					Ppp2r1a	Srsf5
737	Srebf1	Supt3	Selenom		Fzd1	Adamts4	Mlkl	Cxcl10		737					Filip1l	Tspan4
738	Ccdc122	Supt20	Cdh1		Nradd	Dhrs9	Vangl1	Gpr160		738					Ocln	Nhp2
739	Gns	2310009B15Rik	Smc6		Bicc1	Mmd2	Trpc6	Fam65b		739					Bcap31	Gjc1
740	Esrp1	Gpatch8	Pde4d		St6galnac2	Tgfbr2	Homer3	Ifit1bl1		740					Psmb6	Atp5j
741	BC003331	A330017A19Rik	Mkl2		6030445D17Rik	Foxc1	Pmepa1	Mnda		741					Ubald2	Pde3a
742	Kif1a	Rpl8	Cd200		X2210010C04Rik	Areg	Kctd12b	Prcp		742					Rps18-ps3	Bmp1
743	Prkcb	Pik3ip1	Map2		Akr1b8	Gulp1	Fgf13	B2m		743					Chd4
744	Lpin1	Gm44148	Scg2		Tubb2b	Kcns3	Adgrg3	Mndal		744					Arpc5
745	Utp14b	Tcf12	Slc12a2		2610305D13Rik	Galk1	Zfp57	Unc13d		745					Tsc22d1
746	Gm12524	Ssbp2	Ghr		Ephb6	Lrrc4c	Cdc42ep4	Trim30d		746					C77080
747	Tbl2	Apoa1bp	Dsg2		Cyp2d11	Thbd	Phactr2	Fblim1		747					Gm17541
748	Kif19a	Nr4a2	5330417C22Rik		Gltscr2	Metrnl	Bmpr2	Runx2		748					Crb3
749	Il1r2	Dut	Mbd5		X1810013L24Rik	Grip2	Ifi204	Hmox1		749					Fgfr2
750	Gch1	Dapk1	C1qtnf4		Vwa9	Mgarp	Stom	Fgf13		750					Rbpms
751	Dlgap3	Rxra	Nenf		Col16a1	Tead3	Plxna4os1	Kynu		751					Tpr
752	Gm11992	Sbf2	Serpine2		Zak	Papln	9530082P21Rik	Plcg2		752					Calr
753	Fam222a	Gnao1	Bex3		Agmo	Hoxa4	Ehd3	Tpbgl		753					Dynll1
754	Sowaha	Palld	Ndn		Tgfa	Xdh	Arhgap25	Pla2g4a		754					Oser1
755	Slc9a7	Unc79	Cystm1		Vasn	Trabd2b	Nrros	Tnfaip2		755					Vapa
756	Aldh18a1	Nudt13	Dynll1		Snx7	Slc1a5	Fam65a	Renbp		756					Irf2bp2
757	Adgrv1	D130020L05Rik	Pbx1		Fn1	Pde1a	Kctd10	Tlr6		757					Hnrnpm
758	Rab39b	Adgrb3	S100a16		Zfp607	Gdf11	Trpv4	Blk		758					Rabac1
759	Mras	Rpl7	Ica1		Ngef	Mmp14	Tspan12	Ifi203		759					Csde1
760	Prnp	Rabgap1l	Glis3		Vprbp	Fzd1	Snai2	Sh3pxd2b		760					Atp5c1
761	Ttc39a	Josd2	Tmbim4		Bzrap1	9930012K11Rik	Chsy1	Axl		761					Cav2
762	Amigo2	Fam3c	Hsp90ab1		Sema5a	Vasn	Ccnyl1	Sh3bp1		762					Nfia
763	Gm47889	Rps26-ps1	Plin3		A130051J06Rik	Filip1l	Pvr	H2.T23		763					Cox5a
764	Dpp3	Rpl10-ps3	Mrln		Tpm3.rs7	Cacng7	Cfap43	Cxcr4		764					Stmn1
765	Dyrk3	Cadps	Chd9		Gm21967	Lrp1	Lama5	Nlrc5		765					Neat1
766	Eno2	Psd3	A230057D06Rik		Prune	Lypd1	Vgll4	Fam129a		766					U2af1
767	Large2	Cacnb2	Tspo		Erbb2ip	Slc16a4	Sox13	Prkcd		767					Mlf2
768	Rassf4	Fgf14	Rheb		Tfcp2l1	Slc1a3	Sh2d3c	Basp1		768					Tra2a
769	Rab27a	BC023719	Agbl4		Suv420h1	Jag1	Cyp2d22	Maf		769					Atp9a
770	Gck	Npr2	Sumo2		Atn1.1	Gm15912	Fcgrt	Cxcl3		770					Sep15
771	Nek4	Brip1os	Meg3		Fam107b	Fbln2	Lamc1	H2-Q10		771					Sf3b1
772	Nrip3	Fam213a	Jund		Cyp2d22	Plcd1	Prickle2	Slc25a45		772					Anapc13
773	Tspan13	Tanc1	Lncpint		sep.02	Fap	Mospd1	Rbm38		773					Nedd8
774	Gm6710	Rpl14	Spint2		Fdx1l	S1pr2	Calml4	Cdh23		774					Pura
775	Slc1a4	Dnah9	Malat1		Fam195a	Mpzl2	Rsad2	Lrrk1		775					Ptbp1
776	Flad1	Slc6a17	Nbea		Glipr1	Hoxb4	Prrg3	Matk		776					Llgl2
777	Cd63	Lcor	Tmem59		Gm14226	Slit2	X1810011O10Rik	Depdc1a		777					Mmp15
778	Tfrc	Fam57b	Cyr61		Cirh1a	Gas6	Elk3	Tmem173		778					Mapkapk2
779	Zfp516	Rpl27-ps3	Rims2		Wnt9a	Susd2	Gm13861	Malt1		779					Pigyl
780	Grip1	Toporsos	Akt3		Marcksl1	Bmp2	Maf	Nrm		780					Wdr1
781	Paxx	2700094K13Rik	Adamts18		Tnnt2	Lpar4	Car7	Ccdc109b		781					Taldo1
782	Gm45606	Rccd1	Klf6		Mdfi	Inf2	Sh3bgrl2	Vill		782					Slc28a3
783	Gpr27	Vps13b	Ubb		Xrcc6bp1	Fam198b	Acacb	Rel		783					Akap13
784	Ift20	Nucb1	Chic1		Cfap53	Hs3st1	Nr2f1	Dok1		784					Gabarapl1
785	Noxo1	Rpl26	Tnfrsf12a		Cd9	Zeb2	Arhgef7	Ctse		785					Rpl30
786	Chic1	C330006A16Rik	Fosl1		X1810009A15Rik	Ugdh	Itm2a	Mfsd7a		786					Eif3m
787	Idi1	Lap3	Usp5		Gm10093	Ltbp1	Aldh2	Tnfaip3		787					Eif4ebp1
788	A730063M14Rik	Scaper	Ubc		Atp5sl	Pygm	Prkd3	Gins1		788					Drap1
789	Fam46a	Rps13	Dpp10		Slc39a8	Sqrdl	E2f7	Alpk2		789					Slc39a4
790	Timm29	Fgf12	Pls3		Gm12355	Mfsd7a	Plekho1	Impa2		790					Serinc2
791	Vrk1	Tmem130	Plcb1		Fxyd3	Ahnak	Gdf15	6330416G13Rik		791					Lad1
792	Mars	Tmtc1	Msi2		Fads2	Adamtsl4	Ifitm2	Vav3		792					Msn
793	Fam234a	Lrpprc	Xkr4		Smagp	Ehd2	Slc12a4	Gpr68		793					Sf3b2
794	Vapb	Rgs7	Phactr3		Eftud1	Kank2	Lrrk2	Plekho2		794					Rbm8a
795	Dnmt3b	Rpl22l1	Cpa2		X1600002H07Rik	1700001O22Rik	Casp4	Gbp5		795					Mrpl30
796	Sars	Pnck	Atp6v0e		RP23-60P18.10	1200007C13Rik	Gm28875	Cnn2		796					Csnk1e
797	Vsnl1	Tnrc6b	Kcnma1		Rpl10l	Gdpd5	H2.Q7	H2.D1		797					Slc3a2
798	Gm7967	Snx24	Agpat4		Yap1	Akr1b3	Rhbdf2	Gbp3		798					Aamp
799	Gm47882	Dusp16	Fam107b		Gm9726	Stc2	Sat1	Oas1g		799					Paics
800	Dhx32	Rpl23a-ps3	Lars2		Dfna5	Sardh	Slc25a45	Rab29		800					Hypk
801	Jpt2	Klhdc8b	Gnas		Fam129a	Cysltr2	Ralb	Swap70		801					Enc1
802	Crybb1	Rpl37	Sgpp1		Mical1	Pde3a	Lipe	Hamp		802					Puf60
803	Lman2	Pla2g16	Ptprn2		Plek2	Rftn2	Nhsl2	Prr5l		803					Nr2f6
804	9030612E09Rik	Tsen15	Ier2		Zfos1	Fbn2	Serinc3	Fam111a		804					Gsto1
805	Prr15l	Zfp532	Creb3l1		Gm14698	Il16	Trp53i11	Cdk6		805					Vdac1
806	Elovl6	Gng2	Ctsl		Hhex	Gpm6a	Zfpm2	Nusap1		806					Rbx1
807	Qpctl	Ccdc184	Klf12		Fam175b	Cadm2	Kif23	Adssl1		807					Uqcrc1
808	Atp13a1	Rpl36a	Xist		Gm9945	Fndc4	Sema5a	Ifi47		808					Scd2
809	Ifit1	Rps23	Ywhae		Wash1	Il2ra	Brip1	1700026L06Rik		809					Gstm5
810	Fam206a	Gpc4	Maml2		X1110008P14Rik	Smo	Cmtm8	Rassf5		810					Abcc3
811	Ghrl	Bambi	Fndc3a		Slc29a2	Col19a1	Stn1	Ifi202b		811					Shroom3
812	Sec23ip	Serinc5	Ubl5		X2810474O19Rik	Capg	Gm17501	Marcksl1		812					Grcc10
813	Ube2o	Ralgapa1	Suox		Gm26669	9530034E10Rik	Map2k3	Kcnk13		813					Gclc
814	Ciart	X5330417C22Rik	Tnpo3		Fign	Cdkn1c	Tcf4	Cdc25c		814					Eif3a
815	Hid1	Pcdh9	Nrp2		X1700021F05Rik	Gucy1b1	Zfp36l1	Gsg1		815					Pa2g4
816	Nans	Slc25a53	Sorcs1		Misp	Gm5595	Lrig3	Rasa3		816					Mrpl14
817	Agxt2	Lrrc49	Adgrf5		Pm20d1	Rab33a	Plekhg1	Pde1b		817					Foxp1
818	Gpd1	Rpl23	Dpf2		Carkd	Smarcd3	Xlr	Cmtm7		818					Bcl2l1
819	Bhlhe41	2010107G23Rik	Cntn1		Hn1l	Large	Stk10	Rsad2		819					Rpl9-ps6
820	Tollip	Kdm7a	Tmem101		Gm21092	Gstt3	St3gal1	Dnase1l1		820					Vamp5
821	Elp3	Tmem86a	Samd4		9430016H08Rik	Sema3c	Dll1	Ccdc102a		821					Fbl
822	Spink10	Grik5	Glb1l2		Emp2	Cd109	Luzp1	Mapkapk3		822					Pxn
823	Cds1	9530026P05Rik	Actg1		Pkp3	Hoxa7	Acr	Rps6ka1		823					Arl4c
824	Dnaic1	Arl15	Clu		Ttll2	P3h3	Pald1	Nlrc4		824					Ube2b
825	Wscd1	Rps18	Ndufc2		Filip1l	Gm26802	Ifi211	Fth1		825					Ier5
826	Slc25a40	Snhg9	Ndufaf4		l7Rn6	Spns3	Cdr2l	Slc2a6		826					Psmc3
827	Degs2	Pgf	Timm22		X1110004E09Rik	Fbxl22	Colgalt2	Itga9		827					Arpc4
828	Hint3	Prkd1	Rabac1		Mmp14	Agpat9	Hes1	Gm17056		828					Cdc42ep5
829	Atp7a	Rpl19	Zfp422		Gbas	Fam178b	Rrad	Sh3bgrl3		829					Arf4
830	Sh2d5	Schip1	Twf1		Myzap	Col4a3	H2.Q5	Cdkn3		830					Eif3g
831	BC022687	Rmnd5a	Pradc1		G6pd2	Popdc2	Marcksl1	Top2a		831					Rpl22l1
832	Tars	Phf21a	Morf4l1		Fabp3-ps1	Serpinb1a	Ampd3	Anxa1		832					Smim22
833	Atg13	Gm43194	Lyrm2		Fam83e	Cald1	Arhgef26	Slc7a7		833					Ddr1
834	Six4	Atn1.1	Rnf40		RP24-330M21.1	Ppic	BC037039	Hacd4		834					Tsn
835	Aldh9a1	Dnpep	Tmem27		Cdca7	Ly6a	Pxn	Fam105a		835					Frmd6
836	Sfxn2	Pim2	Stx18		Tnks1bp1	Oaf	Itgb4	Rcsd1		836					Ctsh
837	Mthfd1l	Hmgn5	Tmem238		Arhgef39	Sepw1	Afap1	Rab8b		837					Adipor1
838	Zswim1	Mycbp	Ddx5		Hgs	Plac8	Prr5l	Hpgds		838					Ube2r2
839	Stxbp1	Fam120aos	Srek1ip1		Lgals2	Col4a5	Itga9	Tpx2		839					Tsen34
840	Ube3c	Neurl1a	Drg1		Rhbdf2	Tmem151a	Wsb1	Bst2		840					Dsp
841	Gpd2	Pgrmc1	Exosc4		Gm3550	Wisp1	Pcdh19	Bmp2k		841					Klf5
842	Anpep	Ddhd1	Srp14		Sema3c	Trip6	Slc2a1	Arrb2		842					Rps24
843	Rps6ka2	Rpl10a	Ccdc28b		Csrp1	Gbp2	Rgs12	S100a4		843					Csnk2b
844	Fam210b	Zdhhc13	Npm1		Palmd	Rasa3	Tspan14	Rab20		844					Tmpo
845	Smim10l2a	Dtd1	Naca		C77370	Zfp423	Nfkbid	March1		845					Il6st
846	Gramd1c	Dync2li1	Dnajb14		X1700073E17Rik	Ifitm3	Tirap	Gm28707		846					Llph
847	Spcs2	Rps20	Phospho2		Prkrir	Tmem158	Sertad1	Stx11		847					Vasn
848	1500002C15Rik	Sp4	Marveld3		Gm684	Serpinb6b	Jam3	Cxcl1		848					Adk
849	Lrrc36	Tle6	Mapk9		1810011O10Rik	Hoxb5	Sptbn1	Trim36		849					Tmem205
850	Slc25a42	Fam155a	Tcf4		AA415398	Rgma	H2.T10	Ehbp1l1		850					Clptm1
851	Pnmal1	Rpl27	Ccdc59		Smek1	Hn1	C1qtnf2	Ppfibp2		851					Myh14
852	Slc36a1	Gm10709	H3f3b		Rpl7a.ps5	Opcml	Gpx8	Dfna5		852					Tmed2
853	P2ry12	Map3k14	Cggbp1		Pin1rt1	Ptgs1	Irf7	Ppp1r18		853					Maea
854	Ap3b2	Ctnnd2	Rfc2		Ephx1	Zfp185	Gm26532	Oas1a		854					Pkd2
855	Preb	Dcaf6	Fkbp2		Fzd2	Evc	Adrb2	Mis18bp1		855					Rab20
856	Agpat3	Itm2c	Ints1		Ppl	Syde1	Adgra2	Zc3h12d		856					Impdh2
857	Erich6	Rbp4	Borcs8		Fam124a	Zfyve28	Tpm3	Clspn		857					Gdi2
858	Steap2	Msi2	Anapc7		X2010315B03Rik	Phlda3	Ccdc71l	Gm2a		858					F2rl1
859	Def8	Fam60a	9530068E07Rik		Eno1	AI838599	Ahr	Rad51		859					Tmem238
860	Ppm1e	Ccl27a	Gpx3		Vsig2	Tppp3	Fut4	Nr4a3		860					Lrp10
861	Edem3	Dynlt1f	Sidt2		X2610507B11Rik	Gm13251	Pnp2	Itpripl1		861					Cdk4
862	Ostm1	Rps21	Fuom		Mesdc1	Pcsk5	Zcchc24	Rap2b		862					Palmd
863	Lactb2	Asap2	Serping1		1700049G17Rik	Csf1	Socs1	Baz1a		863					Mgat1
864	Rhobtb1	Rgs4	Rab27a		4930523C07Rik	Gm13212	Pld2	Tmsb4x		864					Gadd45a
865	Sez6l	Snrpf	Idnk		Cldn6	Tgm2	Lrrfip1	Cotl1		865					Pdcd6ip
866	Ints3	Stag1	Fam19a5		E230025N22Rik	Loxl2	2610305D13Rik	Itga5		866					Mpc1
867	Hspa13	Rps16	Taok3		Nat8	Il7	Myl4	Gm11214		867					Gm11808
868	Cpox	Dusp8	Cpq		Tonsl	BC034090	Slc16a13	Stra6l		868					Gclm
869	Hip1r	Foxp1	Gpatch11		X1110038F14Rik	Pcsk6	4931406P16Rik	Spag5		869					Fgfr1
870	Slc41a3	Bbx	Slc25a28		Mapk13	Creb5	Parvg	Cdc6		870					Cox6c
871	Aldh5a1	Tet1	Pfdn5		Rest	Ntf5	Pfkfb3	Abi3		871					Maf1
872	Rpn2	Dnm3	Nap1l4		Ankrd29	Zfp607	Tdrp	Cd247		872					Trib1
873	Aldh3a2	Pitpnc1	Gdap1		Gm14308	Sgip1	Abcc9	Cpne2		873					Ano1
874	Enpp5	Rem2	Sike1		Sema6a	Arhgap10	Mxra7	Plin2		874					Lims1
875	Nfe2l1	Rps17	Rab33b		Gnb2l1	Gstm2	Tgif2	Ctsb		875					Atp6v1g1
876	Acad11	Rpl29	Tmem192		Pwwp2b	Serpine1	Scn1b	Asf1b		876					Atp5g3
877	Sptbn2	Nbea	Fam122a		1810014B01Rik	Bend6	Pcp4l1	Arpc1b		877					Mt1
878	Trpm3	Wbp5	Tmem70		Fam89b	Arhgdib	Cd40	Nxpe3		878					Ctrc
879	Qsox2	Deb1	Nudt16l1		Rapsn	Col4a4	Cdc42ep1	Clcf1		879					Ddx17
880	Zfp251	Npm1	Sfmbt1		AI317395	Plekhg2	Jag2	Naaa		880					Rassf7
881	Chchd10	Glo1	Cisd2		X2610002M06Rik	Pde8b	Nek6	Creb5		881					Cd63
882	Otud7a	Pafah1b3	Tapbpl		Gm37422	Gm39090	Yap1	Dab2		882					Mat2a
883	Cdc34	Rpl15	Mras		Dapk2	Smim3	Ddah1	Hn1		883					Itgb6
884	Vegfb	Adcy6	Rnf8		2700060E02Rik	Hal	Bst2	Nsl1		884					Slc25a5
885	Lgi1	D430042O09Rik	Atp7a		Gm10653	Tgfb1i1	Bcam	Jdp2		885					Nars
886	Zcchc2	Bex1	Otud6b		Acaa1b	Adam19	Rasa4	Tmem37		886					Glipr1
887	Pip5k1b	Rpl18	Urod		Hk2	Gsta3	Kctd17	Grap		887					Gnai2
888	Amer2	Kansl1	Dcaf11		Adcy1	Rpp25	Zfp69	Ifih1		888					Uqcrc2
889	Tceal9	Med28	Per1		sep.11	Sep15	Rab13	Lmnb1		889					Cyp2d22
890	Dnajc16	Rps4x	Cd2bp2		X9330162012Rik	Bst2	Chn2	Cdt1		890					Plscr3
891	Nqo1	Als2	Krt18		Sox4	Casp12	Enpp3	S1pr4		891					Mpnd
892	Snph	Rorc	C030014I23Rik		Rps18-ps3	Cxcl12	Tmod3	BC028528		892					Pole4
893	Srprb	Mkl2	Exosc1		Col4a6	Fxyd7	Schip1	Pdlim2		893					Kansl1l
894	Jhy	Cnrip1	Gnaz		Qpct	Bloc1s1	sep.08	Tgfb1		894					Sfpq
895	Dpagt1	Rps26	Park2		Anxa9	Rab3il1	Prkcdbp	Vim		895					Pacsin2
896	Tbc1d4	Lrp1	B3gat3		Plcd1	Chl1	Pls3	Ube2c		896					Socs2
897	Loxl2	Hspa1a	Golga5		1500002F19Rik	Fstl3	Eln	H2.K1		897					Rrp1
898	Ddx19b	Ltbp3	Smap2		Src	Xrcc6bp1	Cldn15	Lhfpl2		898					Arid1a
899	Herpud1	Rps12	Dbpht2		Lpar2	Inhba	Tifa	Mcm5		899					Rsrc2
900	Abca3	Cbfb	Oxld1		Hiat1	Sparcl1	Proser2	Rhog		900					Bcl10
901	Lrrn1	Eif1b	Slc25a3		X4921524J17Rik	A530013C23Rik	Cd1d1	Epb41l2		901					Bmyc
902	Tmem167b	Slmo2	Cd81		Krt18	Slc12a2	Rassf9	Coro2a		902					Slc39a1
903	Tmem147	Ang	Ubqln1		X2310033P09Rik	Abca6	Xdh	Efhd2		903					Hcfc1r1
904	A530020G20Rik	Malat1	Sem1		1110001J03Rik	Rcn3	Cd151	Arrb1		904					Mal
905	Pigl	Tubb6	Coa7		Lamp3	A4galt	Elf4	G6pd2		905					Mgat4b
906	Bmi1	Rplp2	Golga1		Bhlhe40	Cmklr1	Ctgf	Pltp		906					Ypel3
907	Aacs	Gm11837	Ubr3		Prr5l	Ptp4a3	Slc7a7	Sept6		907					Cited4
908	Arl8b	Rps18-ps3	Mrfap1		Tmem98	Adamts10	Fam181b	Tgif1		908					Txndc17
909	Tmem25	Nrxn2	Fam120a		Tspan14	2610305D13Rik	D8Ertd82e	Ebi3		909					H2.D1
910	Adarb1	Acaa1b	Atg4b		D15Ertd621e	Pltp	Rnf213	Dhx58		910					Chmp4c
911	Nipal3	Actl6b	Zrsr2		Ahnak	Cldn10	Ubtd1	Gltp		911					Ngf
912	Mapt	Nova2	Phf5a		Gja1	Gm13056	9530026P05Rik	Lgals9		912					Ablim1
913	Kpna2	Khdrbs3	Zfp664		Kif7	Gstm1	Robo3	Grn		913					Arf5
914	Gm36543	Ppt2	Whrn		X9930104L06Rik	Tgfb3	Dock1	Tpm3.rs7		914					1810058I24Rik
915	Glrx5	Shfm1	Taz		AA474408	Emp1	Npr1	Cenpe		915					Rpl6l
916	Sec23b	Gm11808	Gpx2		Spdef	Mfge8	Fignl2	Rin3		916					Myrf
917	Rfesd	Tpst1	Tctex1d2		Ccdc125	Cyp4b1	Hdac7	AW112010		917					Rnaseh2c
918	Lbh	Gm10260	Uqcc3		2610528J11Rik	Tspan4	Ch25h	Samhd1		918					Nhp2
919	Hdhd5	Lrba	Chchd2		Whsc1	Ehbp1l1	Efr3b	Gcnt1		919					Cpb1
920	Mrgpre	Zwint	Tmem106b		Scnn1a	Gda	Pim3	Esco2		920					Ilk
921	D5Ertd579e	Ung	Rpl10		Ctage5	Cavin1	Ahnak	Ipcef1		921					Rab25
922	Syn2	Rtkn	Hint1		Cxadr	Gjb3	Arrdc3	Smox		922					Blnk
923	Elovl5	Clcn3	Tspan31		Tjp3	Prr5	Tax1bp3	Nfkbie		923					Epha2
924	Ssfa2	Hnrnph3	Rps4x		Prr15l	Cnn2	Pxdn	Gdpd3		924					D8Ertd738e
925	Mdh1	Klc3	Trpc4ap		Nutf2.ps1	Ednrb	Hcls1	Cdca7		925					Tgfb3
926	Hhat	Rpl6	Tpd52l2		Smek2	Cmtm3	Nova2	Sepp1		926					Nme2
927	Snx32	Gm26699	Alkbh6		Rnf43	Gm4876	Igtp	Tmem106a		927					Ctbp1
928	Rbm20	Ppp1r35	Nudt22		B930095G15Rik	Gm10146	Arpc1b	Lax1		928					Cyth2
929	Ftl1-ps1	Epb41l2	Pycrl		Traf4	Map1a	Gpr150	B3gnt8		929					Hsbp1
930	Clcn7	Rpl38	Sap30l		Sod3	Mdk	Itpripl1	Depdc7		930					Ddit4l
931	Syne4	Olfml2b	Selenof		Bok	Rps2-ps6	sep.11	Cdca3		931					Khdrbs1
932	Trmt61a	Cmtm7	Atpif1		Rtfdc1	Id3	Sult1a1	Sphk1		932					Fam84b
933	Stk32b	Myt1l	Tmem242		Gm10260	Plcl1	Arhgef10	Ptpn6		933					Ptges3
934	Rwdd1	Gstz1	Rpl22l1		Tnfrsf12a	Apobr	Stap2	Piezo1		934					Grb7
935	1700037C18Rik	Bmp2	Sfxn1		Itpripl2	Pde1b	Prr5	Phf11d		935					Anxa6
936	Lgalsl	Reep2	Brd1		Sqrdl	Mn1	Lhfp	Ass1		936					Ctdsp2
937	March4	Fos	Idh3b		Gltscr1l	Rilp	Fstl1	Ccnb2		937					Rassf1
938	C1rl	Zcchc7	Nelfe		Ptgfrn	Anxa2	Oasl1	Zfp385a		938					Hnrnpdl
939	Fasn	Rnf208	Atp6v1f		Arl4c	Tlr4	Art3	Plekho1		939					Serpinb6b
940	Galc	Pld3	Fam46c		BC016579	Sp6	Nexn	Serpinb1a		940					Baiap2
941	6430573P05Rik	Apod	Stambp		Eva1a	CAAA01147332.1	Fgf2	Rnasel		941					Ddit4
942	Marveld3	Eri3	Phkg2		Tuba1c	Clic3	Rtp4	Il1r2		942					Tnks1bp1
943	Larp1b	Tmed3	Pdcd11		Tmprss6	Fam124a	Filip1l	S1pr2		943					Acadm
944	Ap3d1	Chd2	Hspa13		Ptpn14	Rpl13-ps3	Gbp8	Ctsa		944					Irf1
945	Neu1	Uba52	Ppcs		Prmt10	Hoxa5	Casp1	Tpm3-rs7		945					Arrdc1
946	Tada2b	Nfasc	Papss1		RP24-143K11.2	Ldha	Dnah10	Shcbp1		946					Uqcrfs1
947	Arxes1	Kctd17	Mum1		D2Wsu81e	Fam46b	Lyn	Cd302		947					Cdk6
948	Gdpgp1	Amotl1	Mrps10		2210404O09Rik	Fam132a	Ksr1	Entpd1		948					Nras
949	Morn4	Snrpe	Psmg1		Apol8	Selenbp1	Serpinh1	Sh2b2		949					Tob1
950	Tnfrsf11a	Smc4	2310061I04Rik		Gm5424	Ddah2	Hacd4	Rnf180		950					Pdap1
951	Sec31a	Msi1	A130010J15Rik		X5031439G07Rik	Gm10110	Mmd	Tap1		951					Ap2m1
952	Dyrk2	Tomm7	Parp6		Tlr4	Runx1	Fkbp10	Procr		952					Ybx3
953	Abhd2	Stmn3	Specc1l		Ric8	0610007P14Rik	H2.D1	Rem1		953					Gabrp
954	Mfsd11	Dapl1	Vcpip1		Gm8624	Arsj	Acot9	4930455G09Rik		954					Eif3i
955	Dct	Unc5c	Ubtf		1110037F02Rik	Rapsn	Lrmda	Gm20186		955					Ddb1
956	Fdft1	1810043H04Rik	Arfip1		Pacrgl	Garem	Jak3	Fcgrt		956					Ube2d2a
957	mt-Co3	Mthfd2l	Cnot1		S1pr2	Trpv2	P2rx7	Stk10		957					Cdv3
958	C030006K11Rik	Gphn	4932438A13Rik		Gm28809	Rgs6	Sipa1l2	Man2b1		958					Carhsp1
959	Tmem218	Pygl	Synj2bp		B4galnt1	Rpl23a-ps3	Nrgn	Etv3		959					Tspan14
960	Naip2	Meg3	Bhlhe41		Cav2	Ltbp4	Olfml2a	Abcb1b		960					Add1
961	Sugp1	Ccdc107	Haghl		X1810022K09Rik	Tk1	Ddah2	Mical1		961					Cbx1
962	Pcyt1b	1500015A07Rik	Arnt		Macc1	Igsf3	Sox4	Ccna2		962					Spin1
963	2610507B11Rik	Cldn6	Dnajc10		Bgn	Fblim1	Slc10a6	Cdca8		963					Eci2
964	Csnk2a2	Nenf	Taf6l		X2010300C02Rik	Kcnab1	Gm11290	Blvrb		964					Tmem256
965	Cdk5rap3	Mbtd1	Ppa2		Gm17056	Evc2	Ptpn12	Gm26510		965					Lrrc16a
966	Syt2	Uchl1	Tusc2		Cracr2b	Fam102b	Prkd2	Ctsz		966					Rab11a
967	Fam135a	Rpl7a-ps5	Selenok		Abtb2	Fign	Dock4	Smpd5		967					Ctdsp1
968	Mrm2	0610007P14Rik	Itgb1bp1		Bcam	Fam49a	Cenpa	H2-Q6		968					Kdm6b
969	F8a	Brd8	Acbd3		Atp10a	Mesdc2	Prdm16	Gm19684		969					Psma5
970	Gtpbp8	Krt10	Tmem259		Ctxn1	Stom	Cyr61	Qpct		970					Ift43
971	mt-Nd5	Rdm1	Prrg2		Tm4sf5	Oat	Apol9b	Tpcn2		971					Rcc2
972	Cyb561	Rps29	Mdp1		2310036O22Rik	Hspb8	Plxna2	Rrm2		972					Scx
973	Sar1b	Fat1	Fbxo7		Pcnxl3	Tst	Klf2	X1110008F13Rik		973					Il17re
974	Scarb2	Zfos1	Tomm40		Rqcd1	Ifitm10	4930523C07Rik	Ggta1		974					Myh10
975	Gm15510	Pde10a	Kctd2		Ncmap	Itpripl2	Tram2	Il10rb		975					Lama5
976	Sar1a	Rpl35	Nudt3		Ildr2	Dbn1	Gm10638	Il6		976					Mapre1
977	1500009L16Rik	Rpl31	Bcam		X1110059G10Rik	Ldb3	X2410004B18Rik	Plk1		977					Mdh2
978	Trpm4	Med21	Kidins220		Cdk2	2210404O09Rik	Map1a	Dtl		978					Pdgfc
979	Ankrd54	Rplp1	Gck		Ocln	Slc2a3	Smad3	Sdc3		979					Col18a1
980	Abca2	Smim6	Snx10		Gm16586	Rpl36-ps3	Cald1	Ttyh3		980					Trim46
981	Ptprf	Grcc10	Rspo4		Rgma	Tchh	Kit	Lmo2		981					Pfdn2
982	Slc25a15	Scgn	Smap1		X4930402H24Rik	Selm	X2310057M21Rik	Il4ra		982					Pdcd6
983	Slx1b	Rps3	B9d1		Artn	Pdlim3	Batf2	Bub1b		983					Trp53
984	Fam160a1	Atp5e	Ewsr1		F11r	Hey2	Acot7	H2.M3		984					Shank2
985	Dennd2d	Rps2-ps6	Gtpbp4		Gm20186	1110037F02Rik	Angptl4	Ptchd1		985					Pard6b
986	Tbcd	Spsb1	Fam126b		Zfp296	Serpine2	Gsdmd	Bcl11b		986					Eif1a
987	Yipf6	Rnd3	Tstd2		Impa2	Boc	Fgfr1	Tcf19		987					Smarcd2
988	Slc7a14	1810041L15Rik	Snx12		Pdgfb	Obfc1	Rinl	Rgs19		988					Marcks
989	Tmem164	Zfp444	5031425E22Rik		Rab11fip5	Egln3	Jag1	Ndc80		989					9130008F23Rik
990	Tshz1	Gm2000	Abat		Retsat	Lama4	St6galnac2	Ripk3		990					Vgll4
991	Pigg	Fkbp5	Ndufa9		X9530068E07Rik	Gm8730	Gdpd5	Ehd1		991					Wbp2
992	Zdhhc24	Lpp	Yod1		Fam178a	Gm5900	Heyl	Ptpre		992					Abca3
993	BC017158	Rps2	Mrpl9		Serpinb1a	Icosl	Zfp703	Hebp1		993					Lamp1
994	Ric8a	1700023F06Rik	Pdx1		Mob3b	Ccdc64	Ifit3	Agmo		994					Cct3
995	Hectd3	B630005N14Rik	Chd8		AK010878	Myl7	Tnfrsf1a	X1700017B05Rik		995					Idh3b
996	Ptprn	Klhl7	Cops5		Sh3bp2	Cfap57	Mical1	Gm15726		996					Pygb
997	Myo15b	Atp5g2	Mapk8ip1		X1110032A03Rik	Qpct	Card10	Gng2		997					Ubl5
998	Gm4419	Itfg1	Smim1		X1810026B05Rik	Rab38	Ldlrap1	Dck		998					Tomm20
999	Uqcc2	Chkb	Rnf6		Bmp7	Msx1	Cpne2	Tgfbr2		999					Mtdh
1000	Abcd3	Cox7c	Usp35		Crip2	Notch2	Vim	Id2		1000					Ecscr
1001	Abhd6	Naca	Nfs1		Gm5595	Cadm4	Gm10364	Fabp5		1001					Iffo2
1002	Tmco3	Hist1h2al	Wapl		Hmga2	Calhm2	Aplp2	Mycl		1002					Cyb561
1003	Plekha6	Map2k1	Gtf3c6		X0610007P14Rik	A230046K03Rik	Casq2	Cmtm3		1003					Rtf1
1004	Adam9	Rap1gap	Trmt2a		Smarcd3	Ctgf	Rhod	Kif23		1004					Psmd4
1005	Ttc30a1	Gm10020	Sf1		Ict1	Fdx1l	Slc1a5	9930111J21Rik2		1005					Sult1a1
1006	Plppr4	C1qtnf4	Rnf121		Vangl1	Pear1	Ddit4	Itgb5		1006					Pkn2
1007	Wsb2	Bsg	Rspry1		Sh3bp1	Sp110	Apbb2	Raet1e		1007					Pabpn1
1008	Crocc	Commd4	Ikbkap		Trip10	Zswim6	Acer2	Gsdmd		1008					Grpel2
1009	1810021B22Rik	Wbscr22	Gtf3a		2310015A10Rik	Lipo1	Cables1	Hpse		1009					Sptlc2
1010	Copb2	Rpl36	Asb13		Spon1	Palm	Cd24a	Fignl1		1010					Anxa7
1011	Paupar	Me1	Rbm39		Fam65a	Ctsc	S100a13	Crlf3		1011					Acadl
1012	Kifc2	N6amt2	Cdc37l1		Pmaip1	Atp1b2	Fam53b	Pik3r6		1012					Slc44a3
1013	Hook1	Rpl32	Cbx1		Atp7b	Rps26-ps1	Tcf7l1	Arhgap27		1013					Bok
1014	Nell1	Pbxip1	Pafah1b2		Tinag	Egfl8	Dubr	Kif20a		1014					Cblc
1015	Mir670hg	Rpl24	Prom1		Aass	Tnfrsf11b	Skil	Adgre5		1015					Lgals3
1016	Prkca	Cpne8	Cyth1		sep.10	Gcnt1	Nt5e	4833445I07Rik		1016					Zyx
1017	Cerk	Inafm1	Vamp2		Net1	Crtap	Ly6e	Platr17		1017					Kif5b
1018	Zbtb7b	Cystm1	Gtf2i		Dpcd	S100a16	Klf3	Rinl		1018					Ndufb7
1019	Gm48435	Maged2	Commd2		4930403P22Rik	Ch25h	Qk	Macc1		1019					Cd82
1020	Zbtb40	Trmt1	Zranb1		Hdgfrp2	Myom1	Oaz2	Acsl1		1020					Car2
1021	Edaradd	Hint1	Rnaseh2b		Rgs9bp	Pqlc3	Baz1a	Neurl3		1021					Serpinh1
1022	Tcta	Prdx2	Eif1		Klf6	Spaar	Prkcg	Lmo4		1022					Ajuba
1023	Fkbp2	Ndufa6	Hsd17b10		Wbscr22	Ackr1	Fermt2	Fcrla		1023					Tst
1024	Guk1	Rpl17	Ndufb11		Pld1	Nr4a3	Cxx1b	Rnf144b		1024					Bptf
1025	Ap1b1	Emc10	Prkrip1		Prkci	Tmsb10	Fbln2	Psd4		1025					Glud1
1026	mt-Co2	9430016H08Rik	Vamp4		Srd5a1	Gsta4	Gm12166	BC030867		1026					Fads3
1027	Appl2	Rps9	Zfp330		Plscr1	Pla2g4a	Pgm2l1	Rasal3		1027					Cyc1
1028	Gramd3	Tbca	Cog7		Tmem132a	Angpt1	Bicd2	Prex1		1028					Epn3
1029	Cgrrf1	Tspan7	Abraxas2		Syde1	Pdzd2	Myrip	X2810474O19Rik		1029					Psmd11
1030	Pecr	Pfdn5	Rbck1		Ephb4	Kcp	Dennd3	Trim5		1030					Aldh1a1
1031	Baiap2	Bhlhb9	Elovl5		Gprc5b	Ifi211	Myo1c	Ppm1m		1031					Il1rn
1032	Eaf1	Thra	Atg101		Fam73b	Zbp1	Lin7a	Gm7030		1032					Myeov2
1033	Skap1	Mapre3	Pi4ka		2410022M11Rik	Wnt9a	Olfr558	Rassf4		1033					Park7
1034	Smim20	Syt11	Rpl3		BC030336	D830044I16Rik	Ecm1	Sema4d		1034					Src
1035	2410131K14Rik	Top2b	Kdm4a		Gm10094	Speg	Slc16a1	Gm14005		1035					Pqlc1
1036	Gm26606	Acat1	Ap1m2		Suv420h2	Tgm1	Hs3st3b1	Camk1d		1036					Atp5h
1037	Efcab1	Rps27rt	Uqcrb		S100a16	Slc38a11	Nde1	Gm12185		1037					Selm
1038	Bckdk	Hmgn1	Mapk1ip1l		Rhod	Serpinb1b	AW011738	Bcl2l11		1038					Cggbp1
1039	Ank2	Snrpd1	Fos		A930038B10Rik	Hoxb3	Map4k4	Rdh12		1039					Slc7a1
1040	Cep170b	Ccnt2	Trip12		Lrrfip1	Ephx2	Ngf	Ifitm1		1040					Numa1
1041	Pikfyve	Snhg20	Snrpb2		Hs3st1	Galnt15	Ccser2	Pycard		1041					Sertad2
1042	Upf3b	Fam183b	Arl8b		Cct6a	Serpina3g	Arid5a	Sat1		1042					Vat1
1043	Cdkl1	Rplp0	Foxo1		Smco4	Slc12a4	Cep85l	Pik3cb		1043					Tnfaip3
1044	Elovl2	Gm10073	Kif1bp		Esrp2	Cachd1	Klf4	Ctla4		1044					Aebp2
1045	Ufc1	Rps14	Ppil4		Tmem194	AW011738	Vash1	Cldn1		1045					Gsr
1046	Alg12	Prkra	Tbc1d8b		Fam188a	Gm10709	H2-Q4	Haus8		1046					Magi1
1047	Pkib	Grb14	Tmem30a		Zbtb42	Plcd3	Tnfaip3	Glipr2		1047					Ndufb8
1048	Mapk8ip3	Rps28	Pcf11		Fam65b	Tfr2	Plin2	Ppp1r16b		1048					Psmb1
1049	Dpp4	Cnot6l	Enpp5		DHRSX	B230398E01Rik	Nfe2l2	Tlr4		1049					S100a13
1050	Ahcyl1	Rps5	Mapre2		Perp	Sh3tc2	Hs3st1	Gm12117		1050					Ppp4r2
1051	Arfip2	Sarnp	Sipa1l3		Pdlim1	Ccdc69	Ttc39c	Mdga1		1051					Marc2
1052	Abraxas2	Rps27	Rpl24		AA474331	Mical1	Dusp7	Inf2		1052					Ddx39b
1053	Pgm3	Rpl23a	Tox4		Cpsf3l	Car13	Ptpn14	Rtfdc1		1053					Cbs
1054	Acsl3	Uqcrfs1	Hipk3		4930451G09Rik	Col6a3	Tap1	Rnf149		1054					U2af2
1055	Gm17435	Ubqln2	Pmvk		Anxa8	Metrn	Mycn	Tmem189		1055					Anapc11
1056	Osbpl10	Rpl28	Fbxl16		Arrb1	Gsdmd	Mal	Ntpcr		1056					Cish
1057	CAAA01118383.1	AK010878	Hsp90b1		A230046K03Rik	Sema5a	Dusp3	Itgae		1057					Tes
1058	Slc25a16	Hspb8	Smarcb1		Lamc2	Reln	Heg1	Xylt1		1058					Ano6
1059	Ddx60	Faap100	Fam171b		BC051077	Gm15867	Gnb4	Rab43		1059					Prss8
1060	Pxk	Ccdc34	Ap3b2		Gm7808	Dlc1	Itga6	Gmip		1060					Cfdp1
1061	Cmas	Dnase2a	Kif1b		Cercam	Mettl24	C2cd2	Lrmda		1061					Cxxc5
1062	Tmem144	Rack1	Yae1d1		A830080D01Rik	Ablim3	Ier5	Cd7		1062					Dnajc5
1063	Gcdh	Asic2	Peg3		Spry1	Synm	Rab31	E2f2		1063					Atp5g2
1064	Nt5dc3	Nhp2l1	Cox18		2700094K13Rik	Ugt1a7c	Gas7	Ldha		1064					Prrc2a
1065	Adi1	Tgfb2	2210016L21Rik		X2310009A05Rik	X1810011O10Rik	Cpne8	Irf7		1065					Hspg2
1066	Smap2	Lyrm5	Gng5		X1700088E04Rik	Grem2	Wscd1	X5031439G07Rik		1066					Dnaja2
1067	Fkbp9	Serping1	1700123O20Rik		Rtkn	Fanca	Hmox1	Cd274		1067					2810428I15Rik
1068	Gadd45gip1	Rpl7a	Ppp3r1		Ptpmt1	Bcam	Renbp	Hmgb2		1068					Fkbp1a
1069	Tex26	Rps19	Dalrd3		Raver1	Gjb4	Lipt2	Cenpl		1069					Arpc3
1070	Zfp9	Hdgfrp3	Aggf1		Degs2	Rhbdf1	Frat2	Tex14		1070					Cldnd1
1071	Zfp106	Gm16124	Ktn1		Nudt8	Epdr1	Pnp	Ada		1071					Lzts2
1072	mt-Nd4	Rbm4b	Pyurf		Krt8	Tgfb2	Insr	Cmah		1072					Me1
1073	4833418N02Rik	Thtpa	Gmds		Plce1	Bfsp1	X1700020I14Rik	Icam1		1073					Ccdc12
1074	Rangap1	Slc30a8	Angel2		Hiatl1	Gm17501	Cmklr1	Itpripl2		1074					Hax1
1075	Itgav	Tspan12	Tom1l2		0610007P14Rik	Alad	Vcam1	Plxdc1		1075					Atp5f1
1076	AL591952.3	Ptov1	Gon4l		Npw	Aldh1a3	Cd81	Tank		1076					Rsu1
1077	Hnf4g	Tshz2	0610037L13Rik		Gm15800	Frmd6	Tpm4	Notch2		1077					Cox7a2
1078	Sntg1	2310036O22Rik	Rae1		Ttc12	Tpm3-rs7	Ly6c2	Dhrs3		1078					Casp12
1079	Cpeb1	Celf4	Itm2b		Dok7	Bdnf	Tpm3.rs7	Gm17087		1079					Nr4a1
1080	Steap1	Hmgn2	Stard3nl		Snhg3	Gm10020	Sdc3	Ifngr1		1080					Ralbp1
1081	Npnt	Zbtb20	Srf		Atp5o	Anxa9	Ccdc102a	DHRSX		1081					Ephx1
1082	Ghr	Mageh1	Zc3h7b		Arap2	Eya2	Xaf1	Pde2a		1082					Fam129b
1083	Smim14	Ifih1	Sdhaf1		Tax1bp3	Rps18-ps3	Rusc2	Socs1		1083					Cab39
1084	Slc35f5	Rpl21	1810022K09Rik		Adck4	Zfp503	Dock6	Sdc1		1084					Srrm1
1085	Wipi1	Pabpc1l	1110038F14Rik		Bcl2l12	A830080D01Rik	Ifngr1	Naip5		1085					Snrpf
1086	Smug1	Mpc2	Sfxn2		Tmppe	Msln	X2900026A02Rik	Psmb8		1086					Cap1
1087	Tmem267	Rps25	Trak2		X2310036O22Rik	Chst14	Zdhhc18	Pld2		1087					Mrpl23
1088	Swsap1	Klf4	Ubxn10		Smpd5	Lamb1	Rhebl1	Adgrg6		1088					Eif1ax
1089	Aars	Mrpl41	Efcab1		Xdh	2700060E02Rik	Pir	Xlr4a		1089					Sdc1
1090	Ostc	Jun	Ddx27		X2310009B15Rik	Gm20186	Iffo2	Vcam1		1090					Aff4
1091	Jph4	Sphkap	Hspb8		Kcnk5	Crip2	Zfp521	Ier5		1091					Cops6
1092	Rnase4	Eef1g	Efcab14		Zc3h11a	Plscr4	Plscr4	Tmem261		1092					Dync1i2
1093	Hcn2	Tmsb4x	Lsm7		Unc13d	Prkrir	Tbc1d2b	Pmepa1		1093					Traf4
1094	Lrfn1	Phxr4	Npepps		Plxna1	Pvrl1	Tns2	Car9		1094					Plxnb1
1095	Tmem184c	Atp5c1	G3bp2		Hmga1	Adcy5	Rilpl1	Cep55		1095					Chdh
1096	Sec61b	2900093K20Rik	Rpl21		X9030624J02Rik	Adamts1	Ptprm	Incenp		1096					Pfdn1
1097	Rtkn2	Mrpl52	Fam91a1		Slc27a3	Hotairm1	Cxx1a	Adrbk1		1097					Plin3
1098	Dapp1	Isl1	Uros		Gm10020	Msrb3	Naalad2	Apitd1		1098					Pafah1b1
1099	Syce2	1110001J03Rik	Tmco3		X0610010F05Rik	Cend1	Lpcat1	Klk8		1099					Osbpl3
1100	Erich3	Fau	Pard6a		Mettl10	Ephb6	Ablim3	Prag1		1100					Phb
1101	Cntrob	Rps27l	Zfhx2		Arhgef10	Spry2	Irak2	Pvt1		1101					Stap2
1102	Gdap1	Rpl22	Ube2w		X0610030E20Rik	Nkx2-3	Cdkn1c	Mfsd7b		1102					Rsrp1
1103	Srp9	Usmg5	Arid1a		AI661453	Sept2	Mef2a	Dapp1		1103					Sf1
1104	Fuom	Ppt1	Phkb		Gm3336	Gm10260	Map3k7cl	Tnfsfm13		1104					Hnrnpd
1105	Kcnb1	Calm2	Fam206a		Tceb2	Pianp	Sntb2	Psap		1105					Perp
1106	Mogs	Ppdpf	Usp22		Car13	Anxa3	Dusp1	Rad51ap1		1106					Etf1
1107	Kcnn1	Tmem106c	1110004E09Rik		Rpl23a-ps3	Sncg	Sema6a	Cdc20		1107					Capg
1108	4931428F04Rik	Acer2	Ubr4		Fam84b	Scarf2	Slc46a3	Tnfaip8		1108					Hspb1
1109	mt-Cytb	Clip3	Th		Cdc34b	Kdelc2	Dcbld1	Dock10		1109					Supt4a
1110	Irak1	Rpl41	Mepce		Prkd3	2810428I15Rik	Pcdh1	Pgd		1110					Rab10
1111	B3galnt1	Arg1	Hsdl1		X1600012H06Rik	Gm14698	Phlda1	Csf2ra		1111					Sf3b4
1112	Dagla	Atxn10	Qser1		Pygb	Gm4799	Unkl	Tfeb		1112					Gm8624
1113	Pank3	Babam2	Pnn		Fam179b	Car11	Fgf1	Plaur		1113					Cct8
1114	Rrp12	Atpif1	Brap		X2410131K14Rik	Gm9844	Cdkn2b	Syngr2		1114					Ptov1
1115	Gne	Dbn1	Fbxo2		Plin3	Gm6576	H2.T23	Gm9843		1115					Chrnb1
1116	Bicdl2	Eif3k	Dnajc13		Ppp2r4	Adam33	Zbtb16	Cdca7l		1116					Nedd4l
1117	Usp16	Mid1ip1	Rasa1		Ptrf	Ifi203	Ostf1	Irak2		1117					Gatad1
1118	Isoc1	8430408G22Rik	Retreg3		Snx33	X2310057M21Rik	Amotl1	Otud1		1118					Phldb2
1119	Pou6f1	Rpl10	Smndc1		Gng13	Dact1	Nr2f2	Mgat4a		1119					Trim8
1120	Atp8a1	Rpl5	Agtpbp1		Rfwd2	2810417H13Rik	Tm6sf1	Hist1h1b		1120					Echs1
1121	Pigh	Gm8730	Usf1		Gm19345	Plat	Smco4	Pip4k2a		1121					Txndc9
1122	Rab19	Gadd45a	Ormdl3		Afap1	Crym	Megf6	Ifit3		1122					Rabggtb
1123	mt-Atp6	Stra13	Med25		Cdc42ep5	Tceb2	Il10rb	Xdh		1123					Mtcl1
1124	Nr1h4	Eif3e	Nol12		Rdh10	Zeb2os	Prkx	Adam17		1124					Zfp644
1125	Osbp	Tiparp	Mrpl35		Snhg18	Pdlim1	Gbp7	Pfn1		1125					Sap18
1126	Yipf5	Baiap3	Rnf20		Zdhhc9	Snx33	Uaca	Neurl2		1126					Fosl2
1127	Zfyve21	Ssr4	Tmem203		Cgn	BC030336	Lsamp	Cat		1127					Banf1
1128	Extl2	Gm2a	Orai3		Enthd2	Slc2a10	Irgm2	Abtb2		1128					Tuba4a
1129	Hist1h2ac	2810428I15Rik	Cdc16		A230005M16Rik	Hrc	Cd200	Zfp36		1129					Ndufb4
1130	Scyl3	Ndnl2	Aspscr1		Rpl13a.ps1	Cd151	AU020206	Wipf1		1130					Cetn3
1131	Fbxo27	Sorbs1	Clock		Kirrel	C130026I21Rik	H2.K1	Gm3839		1131					Neurl3
1132	Atp6v1a	Gm45330	Cep164		Icam1	Trim30d	Arhgef6	Sema4a		1132					Sema5a
1133	Ift88	2700060E02Rik	Rps27a		X2410004B18Rik	Itga5	Trim12a	Ccdc69		1133					Prpf19
1134	Trub1	Rps15	Gnpnat1		Hbegf	Daglb	Csrp2	Gng10		1134					Ghitm
1135	Casc4	Rpl3	Smyd2		Gm8730	Utp11l	Helz2	Pygl		1135					Ssrp1
1136	Vps13c	Esrrg	Dhx15		Rassf7	9430016H08Rik	Hyal2	Rcan1		1136					Ppp1cc
1137	Psph	Cpe	Creb3l2		S100a6	Myrf	Casp8	Gla		1137					Zfp395
1138	Lrp11	Nrip1	Sf3a1		Cyba	Rpl6l	Pygm	Cd44		1138					Rnf4
1139	Fem1a	Hcfc1r1	Ankrd13c		Sec14l2	Homer3	Ephx3	Atp6v0c		1139					Prkci
1140	Crot	Eif3h	Zfpl1		Myl12a	1110001J03Rik	Obfc1	Rest		1140					Mvp
1141	Scamp5	Mapk10	Wdr92		Gm4737	Pcnxl4	Pik3r3	Knstrn		1141					Prox1
1142	Efhc2	Pcbd1	Lats1		Hsf2bp	Cdt1	Tlr4	Tuba1c		1142					Wasl
1143	Upb1	Rpl18a	Sorl1		2810459M11Rik	Cpne2	Gulp1	Dlgap5		1143					Gm16286
1144	Gde1	Rnaseh2c	Scaf11		Apoo-ps	Rhoj	Notch3	Gdf15		1144					Ccni
1145	Yif1b	Eef1d	Ift27		X1810030O07Rik	Nsg1	Des	Fnbp1		1145					Svbp
1146	Gas2	Gabarapl2	Rpl30		Creb5	Mertk	Rassf1	Rilpl2		1146					Prkd3
1147	Sowahb	Hmgb3	Oaz1		Casp4	Peak1	Il34	Dna2		1147					Rnf11
1148	Satb1	Gm26917	A230050P20Rik		Runx1	Layn	Dnajb5	Tgfbr1		1148					Syngr1
1149	Gm14167	D2Wsu81e	Immt		Cys1	Phldb1	X1700073E17Rik	Suv420h2		1149					Alb
1150	Mcfd2	Clk1	Cdc23		Sepw1	Star	Tubb6	Map3k8		1150					Ndufa7
1151	Dhcr24	Fgfr1	Cyhr1		Slc26a7	Sctr	Sp110	Msrb1		1151					Mpst
1152	Rwdd4a	Sik3	Pak2		Adat3	Rcsd1	Nfkbia	Nek6		1152					Syf2
1153	Gmppa	Hspa1b	Rps9		Nhp2l1	Tmem47	Zc3h12a	Pmf1		1153					Klf10
1154	Ift81	Slc29a4	Lamtor1		Agpat2	Pros1	Gm26735	Tifa		1154					Ramp1
1155	Mapk14	Prdx5	Hsf1		Fosl1	Gm10093	Rbm38	Abhd12		1155					Mtpn
1156	Sc5d	Athl1	Armcx3		Gm5900	Tuba1b	Mex3b	Ccnb1		1156					Qsox1
1157	Mettl1	Pcbp4	Pag1		Tff2	Ptger3	Mb21d1	Cnp		1157					Itm2b
1158	Rhd	Nav3	Mboat2		Gm10146	1810043H04Rik	Krt80	Prr5		1158					Mboat1
1159	Hist1h1d	Hikeshi	Adsl		Gm6483	Lnp	Slc26a11	Arpc4		1159					Nsa2
1160	Ergic2	Sh3kbp1	Oser1		9030617O03Rik	l7Rn6	Cdk2	Gk		1160					Rnf10
1161	Lars	Dennd5b	Ccpg1os		Gpt2	Tns1	Fam129b	Tmem123		1161					Myof
1162	Hsd17b7	Hsph1	Wdr37		Kif1c	Arhgef25	Tmed5	Pak1		1162					Mif4gd
1163	Ufsp2	Atp5l	Rps3		X1700020I14Rik	Mapk12	Ltbr	Sap30		1163					Hebp2
1164	Sgsm3	Cenpx	Zfp787		Gm19426	Klf2	Rell1	Hmmr		1164					Txn2
1165	Lrfn3	Cpeb3	Pcif1		Gm21983	Adcy7	Smox	Nfkb2		1165					Eci1
1166	Tmem231	Btf3	1500011B03Rik		Gdf15	Aldh2	Aspn	E130012A19Rik		1166					Wdr26
1167	Pax6	Lsr	4930453N24Rik		Gm12940	Ifi204	Prex1	Apobec1		1167					Srsf6
1168	Rcan3	Gm9843	Rbm47		Gm26725	Igf2	Mcl1	Pdlim4		1168					Cracr2b
1169	Alk	Atp5h	Prrc1		Rps2-ps6	Rprm	Gm17087	Ftl1		1169					Setd8
1170	Timm8b	Fam107b	Gpat4		X1190002N15Rik	Gm9843	B3gnt2	Kcnn4		1170					Fdx1
1171	Tmem151b	Hspe1	Poldip3		Gm13139	Cyp2d22	Ass1	Gm6498		1171					Ccdc34
1172	Znhit2	Unc13b	Prr3		2810029C07Rik	Sorbs3	Slc15a3	Gas7		1172					Nap1l1
1173	Stt3a	Peg3	Cdk9		Fam229a	Fam109b	Mgp	Pla2g15		1173					Vezf1
1174	D1Ertd622e	Tpt1	Suz12		2210011C24Rik	Usp13	App	Sdc4
1175	Tmed2	Agap1	Bbc3		Ccdc102a	Gm10116	Pgm1	Acox3
1176	Maged1	H2afv	Eloa		Dbndd2	Praf2	H2.M3	Bard1
1177	Sec22c	Zfyve26	Dazap1		Gm7628	Rcn1	Ipo11	Grasp
1178	Tusc1	Pde4dip	Psmc4		Nr2f2	Flna	Pqlc1	Galnt3
1179	Vps35	Brd3os	Amigo3		Tceb3	Ankrd9	Xiap	Cdk1
1180	Pih1d2	Eif3f	Coa6		X4931406C07Rik	Pik3cd	Slc23a2	Ccdc106
1181	Ufl1	Phf8	Zfyve27		Gm10126	Chrd	Xylt2	Hells
1182	Fam171b	Coq8b	Ep400		Mesdc2	6330408A02Rik	Phf11b	Pald1
1183	Maneal	Sgpp2	Psmc5		0610011F06Rik	Itpripl1	Cmah	Kctd12
1184	D130043K22Rik	Pcyt2	Rpl9		Rpl6l	C030039L03Rik	Svbp	Gpr137b
1185	Jade1	Fam134a	9030624J02Rik		Fam134c	Carkd	Rara	Socs3
1186	Uhrf1bp1	Erbin	Nt5c		Pou3f1	Gng13	Steap4	Pxdc1
1187	Cthrc1	H3f3a	Copz1		Obfc1	Akap2	Dbndd2	Zfp456
1188	9130221H12Rik	Kat6b	Cebpz		Ifngr1	Rassf2	Parp14	Mcl1
1189	Tmem102	Cep120	Tnfrsf11a		X9130401M01Rik	Gm17056	Asap2	Gdap10
1190	Pigr	Psmb1	Mtif3		Gm10709	Ankrd29	Jup	Fam102b
1191	Slc5a6	Ube4b	Smarcc2		Gyltl1b	Gamt	Rin1	Pfkfb3
1192	Thsd4	Ell2	Lrfn3		X1110037F02Rik	Ston1	Ndufa4l2	Irak4
1193	Tysnd1	Megf9	Gdpd1		Fzd5	Pcdhga8.1	Dpysl3	Crlf2
1194	Qdpr	Nup210	Hspa4		3010026O09Rik	Tcf7l1	Gm7293	X1810058I24Rik
1195	Hist2h2aa1	Rpl36al	Slc39a13		Gsto1	Reck	Myh11	Lrrc3
1196		Clasp2	Mettl9		1810043H04Rik	Tek	Mvb12b	Tmem86a
1197		9330182L06Rik	Dcaf8		Sapcd1	Gm9755	Gucy1b1	Ap1g2
1198		Uqcrh	Dmxl2		Selo	Vwa9	Ifit3b	Slc16a3
1199		Tmod2	Abhd14b		Nfkb2	Fam89b	Tmem120b	Soat1
1200		Ccdc53	Idh3g		Erich5	Atn1.1	Fam89a	Gm5069
1201		Ept1	Rab39b		Slc22a2	F2r	Bmp5	Stom
1202		Foxn3	Tmem135		Plp2	Ces2g	St3gal4	Rnaset2a
1203		Gm30025	Prmt1		Nudt19	Yap1	Gper1	Fli1
1204		Tom1l2	Golga2		Rpl10.ps3	Fam71a	Sh3d21	Cttnbp2nl
1205		Rpl39	Grsf1		X3110043O21Rik	Stc1	Cspg4	D930015E06Rik
1206		Snrpg	Mrpl10		Prr5	P2rx6	Epb41l2	Gatsl3
1207		Tceb1	Sumf1		Palld	Il2	Acy3	Tec
1208		Cox5b	Mrpl55		Gm14091	Lbp	Lamp3	Arhgap11a
1209		Ubr5	Togaram1		Hmga1-rs1	Gng10	Phlda3	Nfe2l2
1210		Adgrl3	Prkcz		D830044I16Rik	AI464131	Crlf2	Stmn1
1211		March11	Opa1		Myadm	8030423F21Rik	Col18a1	Spred1
1212		Mtmr3	Rps3a1		Lrp5	Mxra7	X4921524J17Rik	Dock8
1213		Atp5j2	Ago2		Il2	Rest	Paqr7	Rin2
1214		Rpl4	Tmem33		Ehf	Cd9	Rtl8a	Filip1l
1215		Eef1a1	Nudt2		Prtg	Efemp2	Hoxb3os	H2-D1
1216		Anp32a	Cyfip2		Elovl7	Fam195b	Fam63a	Ctsd
1217		Wdr25	Elp3		Eps8l1	Pxdc1	Rasl12	Cfh
1218		Mesd	Mapk8		X2210016L21Rik	Erbb2	Mir22hg	Gsto1
1219		Meis2	Gatad1		AA386476	A530032D15Rik	Abcc4	Dennd4b
1220		Tmem245	Fbxl14		Rnf152	2700029M09Rik	Gdf10	A630072M18Rik
1221		Pla1a	Med16		Lamb2	Fam65b	Psmb8	Klf2
1222		Far1	Lgalsl		Trim16	Map3k6	Uchl1	Gypc
1223		Gm10250	Fbxw8		Gm17066	Mettl10	Dab2ip	Crip1
1224		Epcam	Pbx2		Smoc1	Sh3bp1	Bok	Zfp69
1225		Ccdc73	Psma6		Cdca7l	Apbb1ip	Ube2l6	A230046K03Rik
1226		Selenoh	Nmt2		Ccdc68	Fbxo24	Fmo2	Panx1
1227		Ascc3	Gde1		X2510039O18Rik	Sept8	Arrb1	Mms22l
1228		Zfp652	Mocs2		Paqr4	Afap1	Cox4i2	Lrrfip1
1229		Micu3	Coq4		Tmsb10	Rarb	2410016O06Rik	Cyfip1
1230		Frk	Cct3		Ier3	Nradd	Gas6	Arl10
1231		Cox6b1	Stx7		Ptk7	Fam188b	Usp43	Rqcd1
1232		Phf14	Tmem208		X4833420G17Rik	Dapk2	Dennd5b	Plbd2
1233		1700008J07Rik	Hnrnph2		A930012L18Rik	Gm10699	Nfkb2	Gm8730
1234		Ccdc92b	Ormdl2		Rps26-ps1	Fkbp7	Adipor1	Csrnp1
1235		Rpl12	Eef2kmt		C77080	Rnf144a	Klf7	Tep1
1236		Btg2	Atad3a		Dleu2	Tmem198b	Sertad2	Palb2
1237		Swi5	Emc8		Pcnxl4	Stx1b	Myh9	Myo7a
1238		Pcgf5	Pum3		Tmem261	X1700025G04Rik	Tlnrd1	Gpr162
1239		Tmem131	Mlycd		Gm9843	Ifitm2	Gpr153	Rnf19b
1240		Ube2h	Tfg		2810428I15Rik	Adcy3	Plekhg5	Nfkbia
1241		Trim33	Nup50		2700029M09Rik	Fgf13	Rgs3	Coro1b
1242		Arih1	Mrpl48		Hspb2	Ninl	Frmd8	Stat5a
1243		Tonsl	Mrpl14		Tmem37	Gm10094	Erbb2ip	Litaf
1244		Usp47	Mplkip		Zc3h12a	Gfra4	Lrp5	X2310011J03Rik
1245		Utp11	Gtf3c2		Ybx2	Atp5o	Tap2	Cd27
1246		Cmc1	Trmt6		X9130023H24Rik	Pxdn	Wasf2	Slfn5
1247		Lnx1	Clpx		Homer3	N6amt2	Ripor1	Slc35f6
1248		Zkscan7	Sucla2		Sdc4	Hpse	Zfand5	Mtmr14
1249		Arf5	Azin1		Fam21	Gltscr2	Lmo4	Gbp2
1250		Sepp1	Yme1l1		Ndnl2	Ace	Bpgm	Mfsd12
1251		Sumo2	Surf2		Ltk	Ebf3	Mylk	Msn
1252		Tm4sf4	Zfp553		Pxn	Fam175a	Gm14005	Rap2a
1253		Mtmr7	Nrd1		BC051628	Phlda1	Agrn	Wash1
1254		Fibp	Zfp771		9030407P20Rik	St8sia2	Arhgap23	Gbp9
1255		Trip12	Hmg20b		D930015E06Rik	1810026J23Rik	Rasl2.9	Mapkapk2
1256		Wwp1	Fam83h		X2010107E04Rik	Tubb2b	Spata13	Mvb12b
1257		Tspan2	Ttc1		Mfsd7b	Snhg17	Cebpb	Kif11
1258		Tnfrsf12a	Fyttd1		Gm26549	Prrg3	Git1	Smad3
1259		Rnf38	Pitpnb		Trim46	Mgst1	Lnx2	Flna
1260		Zfp62	Ccdc174		Commd5	A930004D18Rik	Pdf	Gna13
1261		Ctnnbl1	Pomc		BC026585	Avpr1a	Casp7	Fap
1262		Ints6l	Atf6		Gm5449	Tgif2	Itpkb	Gm10260
1263		Tsr3	Nelfcd		Ltbp1	X1110012L19Rik	Samd4	Rhbdf2
1264		Pianp	D5Ertd579e		X1810043G02Rik	Zfp36l1	Tgm2	Jpt1
1265		Smyd3	Commd1		X6820431F20Rik	Nes	Necap2	Aldh3b1
1266		Selm	Rbm27		Abcb1a	Slc15a3	Higd1b	Zfp703
1267		Asxl2	Pick1		Chst8	Spry1	Irak3	Shisa5
1268		Sh3gl2	Epm2aip1		Rhou	Ntrk1	Cdk17	Pfkfb4
1269		Fer	Ino80e		Lyrm5	Gm28050	Myl12a	Il17ra
1270		Spout1	Enpep		Rnmtl1	Prr5l	H2-D1	Mpp1
1271		Whsc1	Rpl35a		X1110059E24Rik	Hdgfrp3	Irf1	Ahr
1272		Ppm1l	Cul3		X2700060E02Rik	Epas1	4930503L19Rik	Rtp4
1273		Tbc1d1	Rad21		A230087F16Rik	Csrp1	Mfsd4a	Pde4b
1274		Epb41l5	Abhd13		Gm4944	Catip	Wfdc1	Hlx
1275		Cd81	Lin7c		Neurl3	Toporsos	Rab43	Vasp
1276		Cerkl	Crls1		Plekhf1	Adgre5	St3gal2	Adrb2
1277		Adck4	Stx8		Efs	Sphk1	Galk1	Ifngr2
1278		Sltm	Bcl7a		4933431E20Rik	Renbp	Cyba	Gpx1
1279		Gtf2a1	Fam102a		Mina	Ripk3	Vegfc	Lrg1
1280		Rps6	Znhit2		Eif3j2	Chst1	H2-T23	Ostf1
1281		Wwp2	Rnf19b		Gm15839	Irak3	Gm6498	Actb
1282		Nadk2	Polr3d		Il17re	L3hypdh	Ptp4a3	Gda
1283		2310034G01Rik	Ssrp1		Dgat2	Tspan6	Kctd12	Rps2-ps6
1284		3222401L13Rik	Cyth2		Stbd1	Vwa3a	Ptrf	Plk4
1285		Ifnar2	Srp19		Ppm1m	St3gal2	Nsg1	Mertk
1286		Tmem261	Asb8		Dnajc22	Ksr1	Maff	Rps18-ps3
1287		Slc25a3	Taf12		Gm17491	Fam129a	Mex3d	Gm10126
1288		Hsd17b12	Chtop		Fam167a	Rdh5	Mob1a	Mcm3
1289		Txlna	Cmc2		Rilp	Sdc1	Ccrl2	Tmem134
1290		Mysm1	Irf2bp2		Arhgap28	Athl1	Lmf2	Ppp1r15a
1291		Efhc2	Cwc15		Plekhb1	Lims2	Tead2	Daglb
1292		Hk1	H3f3a		Gm13212	Fam195a	Mesdc1	Ogfrl1
1293		Elp4	Ngrn		Ctnnd1	Ak4	Mknk2	1700017B05Rik
1294		Nell1	Tpgs1		Capg	Cdr2l	Psmb9	Frmd8
1295		Dnajc1	Rnf13		Otud1	9530026P05Rik	Ifngr2	Donson
1296		Lsm10	Rogdi		Ly6g6d	Nexn	Mat2a	Orai1
1297		Prosc	Cby1		X2700094K13Rik	Slc9a3r1	X2310011J03Rik	Limd2
1298		Creb5	Nup35		Galnt2	Dfna5	Ubash3b	Rpl13-ps3
1299		Irf6	Mrpl15		Nanp	Nudt17	Adamts5	Rps26-ps1
1300		Rars2	Chchd1		X1700047I17Rik2	Cacna1g	Rhog	Slc28a2
1301		Zfp292	Twsg1		Gm10250	Galnt6	Triobp	G6pdx
1302		Synj2	Agpat2		Gm13715	Aqp1	Midn	Gfra2
1303		Eml5	Bfar		Rab29	Vnn1	Zfp41	Pram1
1304		E330009J07Rik	Rad23a		Mafk	6330416G13Rik	Pdgfrb	Oasl2
1305		Irak1bp1	Nucks1		Apoe	Snta1	Cnn3	Rbpj
1306		Wdpcp	Hps4		Myh10	Cdc42ep5	Gprc5b	Obfc1
1307		Pcsk2os1	Pdxdc1		Eepd1	Dtl	Tnks1bp1	Gm10020
1308		Cstf3	Prdx1		X1110004F10Rik	Osmr	Arhgef40	D16Ertd472e
1309		Zfp609	Rpusd1		Ccnjl	Gstp1	Tnip1	Ggt5
1310		Tnks	Naa30		Ccbl2	Arpc1b	Gm12117	Slc16a6
1311		Cobll1	Rps19bp1		X1600002K03Rik	Ppp1r18	Uap1	Bak1
1312		Rasgef1b	Papd5		Mlph	Klhl29	Tsc22d1	Fmnl3
1313		Dmxl1	Clns1a		Tesc	2310036O22Rik	Trib3	Csk
1314		Oaz1	Lztr1		X0610009O20Rik	Klf4	Gprc5a	Psmb9
1315		Ccdc30	Stk19		Zfp36	Hdgfrp2	H2.T22	Ubash3b
1316		Enah	Rps6ka2		Frmd8	Vangl1	Tiparp	Aff3
1317		Nt5dc1	Tm9sf3		Cml1	C1rl	Gm4707	Map2k3
1318		Ndufb11	Stk11		Gm13056	Gatsl3	Cdc42bpb	Cd9
1319		Dnajc13	Usp4		X1700123O20Rik	Plcd4	Nup210l	Cln8
1320		Hdac4	Htatip2		Zfyve28	Tubb4a	Pdlim7	Ptprj
1321		Ddx10	Comt		Gpr160	Gpsm2	Rela	Metrn
1322		Tmem126b	Ralbp1		Rras	Sult1a1	Irgm1	Nfatc1
1323		Prdm2	Srpk1		Shfm1	Enthd2	Nus1	Cklf
1324		Gpbp1	Fam104a		Fam195b	Tnnt1	Emp3	Chaf1a
1325		Tlr3	Psma4		Tceb1	Cdk2	Socs3	Peak1
1326		Gnb5	Mrps15		Psat1	Nrxn2	F11r	Rpl23a-ps3
1327		Dicer1	Cant1		Gm15013	Ccdc74a	Plec	Wdr91
1328		Klhl24	Phc2		Adgra3	Limk1	Klf10	Pcna-ps2
1329		AI314180	Ier3ip1		Nfkbie	2700094K13Rik	Zfp36	Dgat2
1330		Tbc1d8b	Sdha		Cd24a	Rgs10	Tagln	Uba7
1331		Rps11	Mrps5		Enc1	Hebp1	Rapgef1	Xlr4b
1332		Pigk	Aldh5a1		Plscr3	Fam110c	Gm17056	Zcchc24
1333		Ncoa1	Lppos		Amot	Nfix	Zfp46	Rab11fip1
1334		March7	Mrps11		N6amt2	Cys1	Tcf3	Npc2
1335		Eef1akmt1	Cyb5r4		Glis2	4930523C07Rik	Gm5069	Serinc3
1336		Mycbp2	Psen1		Mrpl53	Plin3	Tslp	B4galt1
1337		Msrb2	Ptpa		Tssc1	B3gnt9	Usp25	Smim24
1338		Mms19	Arfgef2		Adgre5	Artn	Klf13	Galk1
1339		Srsf10	Cst3		Itga5	Ifi30	5033406O09Rik	Spc24
1340		Slmap	Pdzk1ip1		Ceacam1	Sp100	Rarg	Chn2
1341		Itch	Rufy3		Erf	Hk1os	Leprot	Fam49b
1342		Ccz1	Fkbp8		Ccdc53	Rin1	Nlrc5	Btg1
1343		Folr1	Grin1		Ly6k	Cavin3	Dusp2	Pxn
1344		Nfkbil1	Gria2		Efna1	Tmem261	Rem1	Stat6
1345		Slf2	Fbxo9		Ufd1l	Cdc42ep2	Sptan1	Myd88
1346		Ppp4r3a	Mrps26		Acot7	Slc8b1	8430408G22Rik	Haus4
1347		Rlf	Prrc2b		Sema4g	Paqr7	Ptpru	Plxdc2
1348		9930021J03Rik	Smarcd2		Gm4832	Anln	Pole2	Tgm2
1349		Tmem63b	Pfdn4		Sox6	3110056K07Rik	Ifnar2	Mif4gd
1350		Eef2	Zfp263		Actn4	Epb41l2	Arhgef3	Apobec3
1351		Rfx6	Bcar1		Cbr3	Pir	Nav1	Tbc1d2b
1352		Hsp90ab1	Aacs		Slc9a3r1	Sema3a	Trpv2	Fhod1
1353		Atxn7	Dnajc8		Rassf9	Fhl1	Ggt5	Orai2
1354		Hspa8	AY036118		Cyp39a1	Stard9	Sft2d1	Gusb
1355		Med27	Zfp131		Snhg4	Hlx	Gm28062	Necap2
1356		St18	Nfkbil1		Pkhd1	Fcgr2b	Plod2	Ptgs1
1357		Ubb	Polr2i		Gm4890	2600006K01Rik	Csnk1e	Gnb2l1
1358		Xrn2	Ulk2		Phf11c	Tnfsf13os	Tusc5	Tkt
1359		Stxbp5l	Ttc39b		Athl1	Plxna1	Rac1	Tnfrsf11a
1360		Usp37	Pgrmc2		X2700029M09Rik	Lgals9	Stx11	Ncapg2
1361		Ndrg3	Dus3l		Prosc	Sepp1	Ppp1r14a	Sult1a1
1362		Gmds	Tbc1d22b		Rpl36-ps3	Rbms1	Lix1l	Slfn9
1363		Snrnp70	Bsdc1		Lgals9	Gm14005	Elf1	Fam69a
1364		4932438A13Rik	Mrpl43		Orc1	Vwa1	Nr4a1	Shfm1
1365		Fech	Nudcd3		C130074G19Rik	Lamc1	X1110059G10Rik	Nin
1366		Hpf1	Hook1		Rbm8a2	Tgfbr3	Slk	Elmo1
1367		Ylpm1	As3mt		Tnip1	Efna4	Cdk1	Rad54l
1368		Cxx1a	Abhd16a		X1810058I24Rik	S100a4	Prkab1	Ccl2
1369		Rbm26	Dnajc30		Rab42	Gltscr1l	Casp12	5031439G07Rik
1370		Nmt2	Dpp4		Ankrd23	Itga1	Sec14l1	Stra13
1371		2810004N23Rik	Ranbp2		Pdzk1ip1	Srpk3	Prrx1	Klf6
1372		Cryzl2	Pdhb		X5730508B09Rik	Zyx	Tnfrsf1b	Mina
1373		Atp5o	Rprd1b		Nthl1	2210013O21Rik	Pttg1ip	Col14a1
1374		Nipbl	Rnf115		Itpkc	D8Ertd82e	Map3k8	Lgals1
1375		Ddx5	Sytl1		1700017B05Rik	Eif3j2	Etv3	Ifit1
1376		Gm379	Mpnd		Epsti1	Acbd4	Syne3	Tuba1b
1377		Fam193b	Gabarapl1		Myo5b	Lyrm5	Rab29	Ifnar2
1378		Gtf3c1	Srsf1		Rassf5	Gm17334	Pon2	Peli1
1379		Fam241b	Ssna1		Odf3b	Fzd7	Def6	Tbkbp1
1380		Gm16586	Rb1cc1		Tcf7l1	Kdelr3	Nin	Cox6b2
1381		Hsp90aa1	Sssca1		Gm17494	Acaa1b	Uba7	Rnf213
1382		Gltscr2	Lage3		2500002B13Rik	Acacb	Rtl8b	Mfng
1383		Lin7c	Dera		Lnp	Abca4	X1700123O20Rik	Skap2
1384		Smg1	Usp1		Mex3d	Sspn	Fam241a	H2-T23
1385		Per2	Eny2		Nnt	Arhgap22	Map7d1	Atox1
1386		Ppp6r2	Nop10		H2.D1	Nudt8	Mis18a	Nfkbib
1387		Luc7l3	Lsm1		Ldoc1l	Fgfr1	Tob2	Rpl6l
1388		Ppp4r3b	Cnpy3		Gata6	Hiatl1	A630072M18Rik	Mitf
1389		Ppm1b	Irak1		X4930453N24Rik	Pacsin3	Sh3pxd2b	Mob1a
1390		Gnb2l1	Borcs7		Rsad1	Snhg18	X0610037L13Rik	Prdx1
1391		Urgcp	Tbrg1		Stk17b	Sp140	Arpc3	Nhp2
1392		Snx30	Taf11		Ube2d.ps	Dbndd2	Rab8b	BC026585
1393		S100a11	Mea1		Sepp1	Bcar3	Kdm6b	Dgat1
1394		Sptbn4	Rwdd1		Jag1	4930579G24Rik	Tmem43	Pnpla7
1395		Shprh	Farsb		Bloc1s1	Zfhx4	Ifitm1	Nagpa
1396		H3f3b	Plxnb2		Ppp1r13l	Adck3	Lxn	Rrad
1397		Cbr4	Khk		Pxdn	Ehd1	Csrp1	X2610507B11Rik
1398		Aaed1	Trim39		Smim5	Clmp	Zfp979	Fam177a
1399		Ern1	Fam173b		Pvrl1	Lfng	Crk	Fam21
1400		Fmnl1	Jtb		A130057D12Rik	Lrp4	Cenpt	Hiatl1
1401		Sobp	Polr1c		E430025E21Rik	X1110038B12Rik	Fam78b	Gm10709
1402		Uri1	Hdac6		X2700062C07Rik	B2m	Pim1	Gm9844
1403		Atp6v0a1	Cdk4		Map3k1	Shfm1	Foxs1	Fam107b
1404		Cops9	Cpd		Dnase1l1	Bcl2l12	Calhm2	Ucp2
1405		Spag6l	Ubald1		Plec	Ttc12	Fam111a	Ahnak2
1406		Stk38l	Hnrnpul1		Myh14	Arrb1	Ntn4	Svbp
1407		Ccny	Hmox2		Gm5616	Ncf2	X1810009A15Rik	Hilpda
1408		Rreb1	Laptm4b		Apoa1bp	Sipa1	Cd274	Gm5900
1409		Bicd1	Zbtb7a		Tnfsfm13	Plekho2	Lrrk1	Cebpb
1410		Zfp65	Rgmb		Rarb	AK157302	Gm10653	Nfkb1
1411		Pafah2	Trappc4		Cox6b2	Gnb2l1	Abi3bp	Anxa2
1412		Dnmt3a	Fitm2		Nop2	BC023719	Dnase1l1	Mknk2
1413		Crebrf	Anks3		Cldn7	Sbspon	Slc12a2	Zyx
1414		Ncoa6	Esyt2		Alad	Xkr8	Lyl1	Gltscr2
1415		Sec22a	Vamp7		X5530601H04Rik	Col4a1	Clic1	Skil
1416		Tm9sf4	Ankrd40		Mpp1	Arhgef40	Atox1	Fn1
1417		Atg10	Exosc7		PISD	Ptch2	Znrf1	Isy1
1418		Chm	Tmed7		Ssh3	Mfap2	Mcm5	Acot7
1419		Appbp2	Mrps18a		Ptp4a1	Nrk	Stat2	Plekhf2
1420		Gtf2a2	Nipa2		Metrn	Gprc5b	Zcchc6	Cst3
1421		Zkscan1	Tmem245		Dnaaf3	Il4ra	B4galt1	Zfp36l2
1422		Mtmr1	Iah1		X2010107G23Rik	Ces1d	Fam69a	Ifitm3
1423		Atrx	Pabpn1		Gramd4	Mndal	Rarb	Tspo
1424		BC023829	Pqbp1		Dtx4	Spats2l	Chsy3	Crat
1425		Gnptg	Mtcl1		Cnksr1	Lats2	Kank2	Hfe
1426		Gigyf2	Senp3		X1700025G04Rik	Zfp521	Tmem198b	Igsf8
1427		Ikbkap	Gbf1		Gm6793	Rps12-ps3	5730508B09Rik	Cnih4
1428		Ahcyl2	Rnf166		X3110002H16Rik	Axin2	Malt1	Myof
1429		Pex5l	Prpsap1		Prdm16	X1700123O20Rik	Rhob	Ifnar1
1430		Sppl3	Nfxl1		Plxnb1	Vimp	2700081O15Rik	Pnp
1431		Rmdn1	Arfgap2		Mcm6	Gm26825	Wtip	Smagp
1432		Usp36	Zcchc14		Csf3	Ly6c1	Rbms2	Dusp1
1433		Ppm1h	Fbxo32		Nek8	Gm12002	Rhbdf1	2700094K13Rik
1434		Tpm1	2510039O18Rik		Tmem176b	Gm21967	Chml	Parp9
1435		Rap1gap2	Mat1a		Zbtb8b	Nxph3	Mark4	Mcm6
1436		Zfp597	2310022B05Rik		Csrp2	Stra13	sep.02	Rapgef2
1437		Cep170	Npdc1		1190005I06Rik	Tppp	Carhsp1	Mis18a
1438		Cbx3	Rnf126		Cdh1	Myc	Oasl2	Aurka
1439		Slc17a9	Ubr2		Mgat4a	Ppm1m	Rsu1	Nadk
1440		Nlk	Nagk		Catsperd	Ajuba	Kti12	Ezh2
1441		Fnip2	Zyg11b		Maff	Rbms2	Plbd2	Ptgir
1442		Zhx3	Tmem107		Magix	Tril	Slc25a30	Adrbk2
1443		Ffar2	Rnaseh2c		1810026J23Rik	Ric8	Git2	Nfkbiz
1444		Utp4	Mut		Rarg	Rerg	Asap3	Rcbtb2
1445		Ttc8	Tmem109		Slco3a1	sep.11	Cd9	Tmsb10
1446		Gkap1	Ipo9		X3830406C13Rik	Lgals3	Nagpa	Actr3
1447		Ppp1r14b	Atad1		Dnaaf2	Egr2	Calu	Ctla2b
1448		Fam214a	Naa15		Evpl	Rhod	Il17rd	2700029M09Rik
1449		Cd2ap	Pet100		Sep15	Ccdc109b	Syn3	P2ry14
1450		Cep164	Gpr180		0610009L18Rik	Bre	Gm12216	Fam188a
1451		Eloa	Jpt2		X0610012G03Rik	BC029214	Zfand2a	Lactb
1452		Map4k5	Terf2		Nme3	Cdca7	Rpl21.ps4	Cenpf
1453		Rhob	Tox3		Lama4	Hgs	St6galnac4	Atp5sl
1454		Tial1	Gna13		Whsc1l1	Scn1b	Bcl2l12	Clec2d
1455		Dhx36	Atp8a1		Sap25	Ngb	Tanc1	Snx5
1456		Arglu1	Ppa1		Mcm5	Ccdc53	Pgs1	Acvrl1
1457		Arl13b	Tsen54		Arhgap8	Ccdc68	Impa2	Card19
1458		Jak2	Slc30a9		Zfp703	Tcea3	Gna12	Tpm3
1459		Phf20	Mrpl23		Efnb1	Ptges3l	Gclc	Gpr157
1460		Cdc42bpg	Ppp5c		Gm43062	Eda2r	Serpina1b	Pid1
1461		Tmem87b	Enoph1		Wsb1	Pddc1	Sik1	Capzb
1462		Zfr	Dnajc19		9830147E19Rik	D2Wsu81e	Slc20a1	Nudt8
1463		Mrps28	Bola1		Sdpr	Adgrg6	Nasp	Zfp36l1
1464		Slc30a6	Fam213b		Gm10116	Atp5sl	Pdlim5	Plekha2
1465		Mrpl22	Rabl6		Gm4353	Col8a2	Rasa3	Parp14
1466		Nrxn1	Anapc4		Arhgef40	Rps27rt	Spag9	Osgin2
1467		Ankib1	Tesk1		Fuk	Paqr4	Ttc9	Sipa1
1468		Rmnd1	Rps6		Tmem134	Fam188a	Praf2	Stard3
1469		Phrf1	Mgrn1		Foxp3	Emp2	Gpx7	Uba52
1470		Cdc26	Mrps36		Tnfaip3	Oplah	Csrnp1	Arpc2
1471		Mbd6	Nek9		Asun	Rftn1	Impdh1	Mfsd1
1472		Gpcpd1	Zbtb7b		L1cam	Ldhb	Timp1	Vav2
1473		Cdip1	Sec23ip		Rab33a	Myadm	Micall1	Pdgfb
1474		2310039H08Rik	Cand1		Gm12166	Slmo2	Mta2	Dock4
1475		Taok3	Tspyl1		Stra13	Tinagl1	Fosl1	Cyth1
1476		Arhgap12	Calm1		Mapkapk5	Slc35f6	AI846148	Ric8
1477		Nek1	Pik3c2a		Frrs1	Slc44a2	Ctnnb1	Map3k14
1478		Plekho1	Zzef1		Cdt1	Asun	Gabre	Glrx
1479		Sin3b	Ptma		Tbc1d2b	Sema6c	1700025G04Rik	Sirpa
1480		Lrguk	Ncln		Rpl13-ps3	Galm	Rap2a	Gatm
1481		Ssbp4	Stk38l		ago.02	Ripor2	Map3k11	Mylip
1482		Abhd18	Med8		Stat4	Gm26722	Atp1a2	Nuak2
1483		Smim26	Chpf		H2.K1	Slc43a3	Nxn	Xaf1
1484		Nt5c2	Pcyt1a		Shisa5	Wbscr22	S1pr3	2900060B14Rik
1485		Eipr1	Drosha		Fam134a	Hspg2	Ercc1	Bloc1s1
1486		Rspry1	Trib1		Ampd3	2410022M11Rik	Hspb1	Aldh2
1487		1810022K09Rik	Ip6k1		Plekhh1	Poc1a	Ifi35	Arpc3
1488		Dtnbp1	Dpysl2		Acaa2	Adhfe1	Slc28a2	Egr2
1489		Egr2	Pomgnt1		AI606181	Rpl7a-ps5	Mustn1	Mmd
1490		Setd1b	Smarca4		P2rx6	Gata3	Csf1	Dtx3l
1491		Cul2	Mmadhc		Gprc5c	Rab32	Antxr1	Prdm1
1492		Camk2n2	1500011K16Rik		Tmem194b	Nrarp	Crtap	Rgs2
1493		Qser1	Lrrc8d		Hmgb3	Mdfic	Taf7	Abcc3
1494		Tcerg1	Egln2		Sft2d2	Svbp	Cactin	Adamts10
1495		Ubr4	Yipf1		Lmnb1	Gm26720	Ndst1	Tln1
1496		Fam208a	Gapvd1		A830018L16Rik	Fam73b	Spef1	Fancg
1497		Zfp37	Mlxip		Gbp6	5730508B09Rik	Rdx	Fdx1l
1498		Dpcd	Zc3h15		A930004D18Rik	Tmem26	Fem1c	Ptpn1
1499		St7l	Trappc1		Lgals4	Clip4	Snn	Cenph
1500		Ccar1	Atf1		sep.15	Pygl	Gm5786	B930036N10Rik
1501		Zfp451	Mrps28		Slc25a10	Tax1bp3	Stat1	Plxnd1
1502		Tacc2	Taf10		Snhg8	Gucy1a2	Il15ra	Hmga1
1503		Tnik	4933434E20Rik		X2810428I15Rik	Dubr	Nras	Ifit3b
1504		Eml6	Polr2k		X2310022B05Rik	H6pd	Slc30a1	Cstb
1505		Mrpl32	Rundc3a		Sh3tc2	Wash1	Vat1	Cadm1
1506		Ttc19	Fam118b		Cttnbp2nl	Trip10	Jph2	Ifrd1
1507		2310030G06Rik	Cuedc2		Kif23	Phf11d	Actb	Cnppd1
1508		Rif1	Atp6v1b2		Bre	Cldn1	Slc16a2	Gm11808
1509		Mbnl1	Skiv2l		Gm8909	Fam111a	Shisa5	Slc15a4
1510		Capn10	Dhx9		Tnnt1	Mir22hg	Cbr2	Got1
1511		Ago2	March3		Gramd1b	Col4a2	Samhd1	Taldo1
1512		Zmynd11	Tssc4		Gng10	Aff3	Gm5177	Ezr
1513		Afg1l	Eif4ebp2		Tepp	Fads2	Pelo	Rps11
1514		Abhd3	Cdc14b		Fam63b	Acot7	Bst1	Gsap
1515		Hipk2	Cep290		Arf6	Foxf1	Gamt	Ndst2
1516		Tbc1d19	Nol8		Cdo1	Rdh10	Eva1b	Slmo2
1517		Hectd1	Bola3		Mdk	Pter	Ifih1	Pole4
1518		Snu13	Eif2b1		Pacsin2	Tnfsf13b	Hexim1	Bcl6
1519		Mob4	Tmem65		Csrnp1	Rhoc	E2f3	Dse
1520		Mrps26	Tuba4a		Rela	Mill2	Rin2	Mavs
1521		Wapl	Mdm2		Nme2	Cyth3	Traf1	Calhm2
1522		Senp6	Wdr18		X9430016H08Rik	Tpst1	Zyx	Grb2
1523		Zfp871	Fahd1		Fetub	Fam171a2	Pttg1	PISD
1524		Atp2b2	Mrps18c		Wwc2	Dcbld2	Nrbp1	Fmn1
1525		Smarcc1	Trappc3		Tead4	Cyr61	Gstt3	2700060E02Rik
1526		mt-Atp8	Cnot6		B630005N14Rik	Apoa1bp	Zfhx3	Tmem176a
1527		Nelfe	Bag6		Lrrc38	Tmem43	Amotl2	Ubtd1
1528		Npepps	Cers5		Sdcbp2	Rtfdc1	Nuak1	Cd81
1529		Malsu1	Acads		Foxc1	1810009A15Rik	Upp1	Acer3
1530		Rps8	Ube2m		Atoh8	Rras	Magi3	Cndp2
1531		Hdgfl2	Phf23		Cdc42ep4	Rpl13a	G0s2	Pvrl1
1532		Aff4	Mrpl49		Tmprss2	Chst7	Tbc1d2	Wsb1
1533		Fcho2	Nxf1		Gm10031	Cgnl1	Plcb3	H3f3b
1534		Mrps16	Pten		Csf1	Dennd2a	9430038I01Rik	Tpp1
1535		Cnot1	Spen		Gm9776	Lrrk1	Itgb1	Rap2c
1536		Papd5	Wdr46		A330017A19Rik	Dclk1	Gypc	Tmcc3
1537		Eif4g3	2310011J03Rik		X4930539E08Rik	Gm6483	Oas1a	Wdr89
1538		Hcfc2	Mon1a		Tnk1	Lpcat4	Dazap2	Htra2
1539		Gfod2	Mrs2		Pfkfb3	Numbl	Arsa	Gm20707
1540		Kcnk16	Ryk		Golm1	Inpp4b	Mfhas1	Smc2
1541		Ttc26	Mrpl11		Sh3pxd2b	Casp4	X2310022B05Rik	Homer3
1542		Rtraf	Ppp1r16a		Hebp1	Trpv4	Actn4	Mesdc1
1543		Dtnb	Vps4a		Fam109b	Gm4951	Capg	Plin3
1544		Ankrd13c	Ddx24		Prrg3	Hk1	Tmem184b	Blvra
1545		Zfp944	Cript		Ndor1	Ier3	Vamp3	Guca1a
1546		Galk2	Rnf215		Anxa4	Tns2	Cish	Lrp1
1547		Cnot9	Fbrs		Sept2	Tcaf2	Junb	Gm5177
1548		Vwa8	A430005L14Rik		Fstl4	Gm16364	Fut11	Gna12
1549		Akap8	Cct8		Rapgefl1	Plp2	Peli2	Cdkn1a
1550		Nbeal1	Stx12		Chaf1b	Klhl23	Zak	Birc3
1551		Ubr1	Tradd		Pddc1	Adck4	Fabp5	Dbf4
1552		Maip1	Atp5g2		Mgat4b	Cnp	Tmbim1	Casp8
1553		Rasd1	Ibtk		Ahcy	Capn6	2510009E07Rik	Plekhm2
1554		Ppm1a	Galnt1		Arrdc1	C1qtnf6	Myadm	Arhgap17
1555		Zcchc8	Tjp3		Has3	Sntb2	Nqo1	Taf13
1556		Psmd14	Rragd		Gm7293	Gnb4	Npr2	Lrwd1
1557		Rtf2	Plpp5		Col23a1	Timp3	Serpine2	Arid5a
1558		Tbrg1	Vapb		Nrm	Vsir	Mllt4	Parvb
1559		Kras	Ttc19		H6pd	Taf4a	Isg20l2	Tnfsf12
1560		Slc31a2	Cpeb4		Vangl2	Vcan	Ivns1abp	Rasgef1b
1561		Bod1	Rpl11		Nit2	Acot9	Elovl1	Camk1
1562		1810043G02Rik	Psmd13		Dmtn	Clec11a	Rgl2	Fam132a
1563		Huwe1	Mta1		Fam177a	X1700020I14Rik	Smg8	Stk24
1564		Tmem234	Rps6kb1		X5730455P16Rik	Hspa12b	Ttpal	Rps27rt
1565		Rprd1a	Cltc		Cxcl1	Cped1	X1110008F13Rik	Trafd1
1566		Rsbn1l	Osbp		Nup62	Wbscr16	Ednra	Prelid2
1567		Fam162a	March2		Micall2	Nhp2l1	Chmp6	Coro7
1568		Ap3b1	Fastk		Gm5069	Ggta1	Il6	Psme1
1569		Golph3l	2510046G10Rik		Elf3	Pacrgl	Mafk	Slc1a5
1570		Ankrd11	Vmac		Anxa5	Whsc1l1	Lipa	Gab2
1571		Ints6	Arl8a		Prrg1	Ndnl2	Bak1	Mafb
1572		Map3k7	Zbtb14		Rab20	Map3k20	Plce1	Sft2d1
1573		Rnaseh1	Pkp4		Cdh13	Ict1	Ptprr	Abcd2
1574		Irf2	Gtf2f1		Entpd2	Gngt2	Irf9	Rabgef1
1575		Uvrag	Wbp1		Me1	Synpo2	Ifrd1	Scpep1
1576		Sort1	Gadd45gip1		Cep83os	Il17d	Sphk1	Tubb5
1577		Cdk12	Sp3os		Cyp2j6	Igfbp7	Iqsec1	Mir17hg
1578		Deptor	Rab11b		Llgl1	Peli2	Nfya	Arf6
1579		Snx27	Lactb2		Rpl7a-ps5	2900089D17Rik	Tmem185b	Src
1580		Nsrp1	Atg7		Gas2l1	Irf5	Plcb1	Stk4
1581		Ssb	Hes6		Gm21833	Sct	Slc27a3	Pkib
1582		Sil1	Ap3s1		Rhoj	Acp5	Slc38a2	Amdhd1
1583		Apc	Psmd4		Gm26801	Cmtm7	Cast	Rpl13a
1584		Setdb1	Sec22b		Ppm1n	Arhgef10	Runx1	Zfos1
1585		Med6	Psmd12		Ptger4	Asphd2	Trib1	Cap1
1586		Tmem141	Snx17		Ctps	Ube2l6	Fgfrl1	Gm2000
1587		Efr3a	Vps52		Toporsos	Gm12117	Gatad2a	4930523C07Rik
1588		Apopt1	Dnajc14		Grb7	Id1	Txn1	Nod2
1589		Caml	Ccdc85b		Bik	Oas1a	Crispld2	Rpl18a
1590		Fam114a1	Mphosph9		Slc12a4	Slc25a45	Ctnna1	Gimap1
1591		Xrcc5	Scgn		Thtpa	Arhgef6	Tpst2	Dpy19l1
1592		Snx6	Eif1a		Gm43598	Nde1	Grn	Dennd4a
1593		Fbxo38	Zc3h18		Ascl3	Asap3	Ino80c	Psme2b
1594		Dnaja4	Lsg1		Mknk2	Pld2	X0610012G03Rik	Atg7
1595		Rnmt	Cntnap2		X0610010K14Rik	Rarg	Rbpms2	Tceb3
1596		Med29	Zbtb8os		Heph	Cpsf3l	Itga7	Zfand2a
1597		Grpel2	Dapk3		Plekha7	Tpm1	Hfe	Rbms1
1598		Usp15	Fbxw7		Lsmem1	Myeov2	Mtap	Sulf2
1599		Cox8a	Dnajc15		Ppfibp2	Tnks1bp1	Furin	2810428I15Rik
1600		Matr3	4930402H24Rik		Cttn	Gm3839	Camk1	Pip5k1c
1601		Chchd2	Med20		X1110012L19Rik	Rab11fip5	Inpp4b	Ndc1
1602		Gxylt1	Nrbf2		Cish	Rfwd2	Ctdsp1	Aup1
1603		Trove2	Tmx2		Tbc1d10c	Wdr66	Gm11713	Etv6
1604		Bptf	Ahcyl1		Mbnl3	Npr1	Adarb1	Cdc42se1
1605		Tmx1	Ppp1cc		Pmepa1	Selo	Bik	Commd8
1606		Nxf1	Akr7a5		Npl	Tceal5	Spats2	Mctp1
1607		Mesdc2	Suds3		Acta1	Cyba	Map4	Rpl35
1608		Zfp961	Gak		Mapkapk3	Retsat	Ddx21	Bbc3
1609		Cyld	G6pc3		2900060B14Rik	Zfos1	Ankrd50	Pitpna
1610		Gmcl1	Vps4b		Plekhg6	Tsku	Cd36	Rab5c
1611		Dcun1d5	Cst6		Ripk3	Uap1	Myd88	Slc3a2
1612		Gtf2h5	Tsn		Gm4723	Lmo2	Ski	Ptk2b
1613		Fmc1	Golga4		X1810037I17Rik	Ptk7	Crat	Ahnak
1614		Cdk13	Pik3r1		Tc2n	Tgfbi	Tecpr1	Pcna
1615		Scoc	Glrx5		Zfp7	March2	Tcirg1	Dazap2
1616		Ap2b1	Chmp1a		Selt	Kctd10	Rel	St6galnac4
1617		Dpm2	Mrpl21		Ldha	Gpc1	Cdc20	Gpi1
1618		Dennd4a	Ireb2		Gucy1a3	Pelo	Ppp1r15a	Pbk
1619		Exoc3	Ap3d1		Junb	BC023829	Clstn1	Diaph3
1620		Prrc2a	Mphosph8		Cks1brt	Impdh2	Bcl10	Fau
1621		Arfgap1	Ube2q1		X1810043H04Rik	Msn	Eif2ak2	Mob3a
1622		Krcc1	Kpna1		Osbpl3	Ptgr1	Palm	Lpar6
1623		Otulin	Polr3h		Pcna-ps2	AI846148	Ppm1m	Nampt
1624		Ppil6	Sfr1		Lpcat4	Kcnmb1	Cat	Atp5o
1625		Gtf2f2	Ptges2		Stmn1	Sema6d	Ddr2	Rpl23a
1626		Fbxl4	Arfgef3		Epb41l1	Ephx1	Pop4	Ppt2
1627		Blmh	Rpl6		Gimap9	Myof	Dennd2c	Bag3
1628		Mtmr9	Smchd1		Tagln2	Gm12216	Calr3	Fem1c
1629		Atm	Mrpl51		Il15	Camkk1	Akap1	Tceb2
1630		Zscan26	Yy1		Mgat1	Pxmp2	Golm1	Wdr81
1631		Tceal3	Akap13		Pagr1a	Tnfsfm13	Ripply3	Ets1
1632		Samd13	1700037C18Rik		Wdr72	Sox6	Itga2	Lrrc8c
1633		Fam20c	U2af1		Pcdhga8.1	Pmepa1	Cct6a	Rpl27-ps3
1634		Dnajc7	Eif3j1		Gm10110	Cebpb	Pitpna	Erbb2ip
1635		Ubr3	Pold2		Litaf	Rps2.ps6	Rab35	Ankrd13a
1636		Agap3	Tmem218		Nutf2	Scarf1	Stmn1	Slc9a3r1
1637		Yipf3	Rtf1		Syngr1	Fgfrl1	Tjap1	Lig1
1638		Nfatc3	Bcor		Nek6	Nrm	Igfbp4	Bin1
1639		Znrf2	Mical2		Llgl2	Lmo4	Pde12	Rps29
1640		Fndc3a	Phf20l1		Arhgap27	Fam13c	Cyth3	Elf4
1641		Wdr7	Pck2		Mmp17	Plbd2	Gm14698	Selenbp1
1642		Fyttd1	Unc45a		1700003F12Rik	Enpep	Rps2.ps6	Hsd11b1
1643		Dnajc4	Higd2a		St3gal2	Peo1	Spsb1	Tcof1
1644		Kcnmb2	Commd6		Neu2	Icam4	Mtus1	Nde1
1645		Stim2	Ssu72		Jup	Acaa2	X1600012H06Rik	Sh3tc1
1646		Ndufs8	Aldh7a1		Trim28	Rab30	Il3ra	Ikbkb
1647		Cnnm2	Trip11		Acbd4	Spsb1	Gmfg	Arhgap10
1648		Atp2b1	Utp14a		Slc2a1	Tonsl	Sun2	Gba
1649		Zmynd19	Ccnl2		Ifnlr1	Mfsd9	Oaf	Marcks
1650		Ankhd1	Atp5h		X2810403A07Rik	Gm8797	March2	Pold4
1651		Ppig	Scrn1		Sertad2	Dnase1l1	Ier2	Gins2
1652		Fam169a	Dcaf12		Gm28068	Trim47	Nxpe3	Rps9
1653		Sfmbt1	Mpv17		Gm26720	Itgb5	Cks2	Sun2
1654		Ssh2	Gns		Mansc1	Sfxn3	Tln1	Specc1
1655		Dym	Mark2		Bcl9l	Selk	Fam13c	Ctage5
1656		Mpdu1	Lsm12		Plekhg2	Plin2	Sh3glb1	Prr13
1657		Zc3h12c	Nsrp1		Aldoc	Trim30a	Tspo	Unc119
1658		March8	Rhoc		Gm4978	Apol10b	Rgl1	Capza2
1659		Sympk	Appbp2		Stat6	Dsel	Cyfip1	Timp2
1660		Yeats4	Gusb		Garnl3	Plxna4	Csnk1d	S100a6
1661		Trpc4ap	Rad17		Zfp456	Tmem173	Vopp1	Me2
1662		Nipsnap2	Elp5		Atf3	Fam65a	Trim5	Tbc1d10a
1663		Xrcc6	Rpp21		X2310057M21Rik	3632451O06Rik	Ppp1r9b	1810043H04Rik
1664		Bbip1	Psma1		D930048N14Rik	Mesdc1	Nmi	Pabpc1
1665		Ercc6l2	Adprhl2		Reep4	Gm12942	Ezh2	Inpp4b
1666		Stk19	Clpp		Ubash3b	Tnfsf9	BC030336	Cenpu
1667		Nudt3	Clstn1		Firre	Abhd4	Atp11c	Tspan14
1668		Chd8	Mgat1		Id2	Itgb3	Psme2b	Eno1
1669		Aasdhppt	Rnf5		X2210016F16Rik	Nnt	Efnb1	Gm10250
1670		Fam46c	Mbd3		Raet1e	Heg1	Marveld1	Gm8186
1671		Scfd1	Zcchc17		Cblc	Fam21	Pcna	Bid
1672		Thoc3	Cyb561d2		X4931406P16Rik	Pstpip1	Pdgfa	Rab11fip5
1673		Aplp2	Iqgap1		Arhgap19	C330006A16Rik	Dhx38	Ly6e
1674		Hadha	Axin1		Unc5b	Zc3h12a	H2-T22	Zfand5
1675		Ankrd33b	Jmjd8		Pvrl3	Mfsd3	Hiatl1	Adam15
1676		Nol7	Nat9		Tmem139	Cdh3	X2310036O22Rik	Slc48a1
1677		Srsf7	Dgkd		Dtl	Gm29666	Rab5c	Hat1
1678		Rsrc2	Slc50a1		Adamts1	Snai1	Raly	Exosc8
1679		Cul4a	Ttc14		Fxyd4	Apoe	Il6st	Rnf122
1680		Cog6	Ensa		Gclc	Trim5	Mapre1	Nrp2
1681		Tmem68	Sh3pxd2a		Mpzl3	AI661453	Tpm3-rs7	Mad2l1
1682		Pias2	Chd4		Ilvbl	Il17rc	Spry2	Hexa
1683		Tardbp	Mrpl40		Efemp1	Wdr89	Elk4	Atf3
1684		Ict1	1110065P20Rik		Tbc1d2	Phxr4	Tspan15	Hiat1
1685		Vps53	Rab3a		Rab11fip4	Thbs1	Pip4k2a	Sdcbp
1686		Ift74	Dtnbp1		Tirap	Erbb2ip	X2410006H16Rik	Ube2f
1687		Dusp19	Sec23b		Txnrd3	Amotl2	Gm17541	St3gal6
1688		Cib1	Babam1		C330006A16Rik	9930111J21Rik2	Sptlc2	Ict1
1689		Faf2	Mrpl34		Prob1	Hiat1	Mbd4	Sept1
1690		Pcif1	Snx27		6330416G13Rik	Matn2	Nostrin	Fam134b
1691		Borcs8	Rbm7		Ctsh	Myd88	Csf2rb2	Tnip1
1692		Chrac1	Acadsb		Myeov2	Slc16a3	Spats2l	Clic1
1693		Trnp1	Rps13		Lsr	Mamstr	Slc25a37	Rasgrp2
1694		Pkn2	Cog6		S100a11	Tceb1	Kctd5	Rbm3
1695		B230307C23Rik	Crtc3		Casp6	Enpp3	Trim65	Mef2c
1696		Stat5b	Syt11		Cxcl2	Sema4c	X2510039O18Rik	Gm10073
1697		Mon2	Ufsp2		Adrbk1	Ier5	Arl4d	Plp2
1698		Rnf25	Mob2		X0610040J01Rik	Zfp286	X5031439G07Rik	Prkd3
1699		Pacs1	Acsf3		Lipt2	B4galnt1	Etv6	P2rx4
1700		Glrx2	AW549877		Nfe2l2	Tnfrsf1b	Cdc14a	Pianp
1701		Kat2b	H2-T22		Traf2	DHRSX	Ppp1r13b	B4galt5
1702		Rxrb	Hnrnpu		Hist2h2bb	S100a10	Cnih4	Sppl2a
1703		Abi2	Ddx39b		X2410015M20Rik	Wbscr27	Agpat5	Peli2
1704		Ldhb	Zfp810		U2af1l4	Dmpk	Tcn2	Zdhhc9
1705		Ndufaf8	Pdzd11		Mpst	1810055G02Rik	Atad2	Emp1
1706		Hivep3	Naa50		Ifrd2	Nfe2l3	Ccdc9	H2-K1
1707		Ccdc91	Cdkn2d		Hdgfrp3	Eftud1	Tceb3	Utp11l
1708		Stag2	Fgd2		Itih5	Dpcd	Abcg1	Mob3b
1709		Gemin6	Emc6		Slc16a2	Tnfrsf1a	Parp9	Abcc1
1710		Dctn2	Dgcr6		Pold1	Cd81	Syne2	St3gal1
1711		Tnks2	Chmp4b		Camsap3	Ppp2r4	Zfp715	Npc1
1712		Ndufv2	Pfn2		Cdk18	Stk32c	Slc3a2	Rps26
1713		0610037L13Rik	Mapk14		Acsf2	Yjefn3	Pole4	Aldh16a1
1714		Gm42067	Ldb1		Myh9	Tnfsf12	Nr1h2	Pgs1
1715		Pop5	Rab22a		Gm27048	Ftsj2	Acsf2	Gdi2
1716		Parl	Sae1		Cnp	Suv420h1	Svil	Rpl10-ps3
1717		Orc4	Eif3a		Fhl3	Mina	Ybx1	Atp13a2
1718		Snupn	Ccdc127		Zfp862.ps	Dpy19l1	Vsig2	Dctpp1
1719		Npdc1	Map3k11		Slc27a1	Btd	Cpt1a	Ethe1
1720		Cnst	Slc44a3		Rab11fip1	Nab2	Ckap4	Evl
1721		Sh3rf1	Zfp275		Tnfsf15	Wtip	Blvra	Sgk1
1722		Dctn4	Nudt5		Slc16a1	Ift43	Trim25	Fam195b
1723		Lamtor5	Timm13		Scarf2	Prdm5	Rgs19	Picalm
1724		Mrpl11	Extl2		Acadm	Gm5069	Yes1	Jak3
1725		Ncor2	Eif4a3		Gm9774	Slc25a33	Cyb5r1	Actr2
1726		Tusc3	Psmd1		Btbd11	Nfib	Mad2l1bp	Trim25
1727		Crebzf	Tmem230		Prkcd	Mocos	Ss18	Bri3bp
1728		Maz	Lmbrd2		Vma21.ps	Oasl2	Rbbp8	Oat
1729		Prpsap1	Eif2d		Gm10699	Gm9774	Zfp948	Bhlhe40
1730		Wasl	Aktip		Atp1b1	Tssc1	Hpcal1	Edem1
1731		2610524H06Rik	Aven		Ankrd61	S100a11	Ankrd11	Rbms2
1732		Psma6	Rufy2		Naprt	Tmem120a	Epn2	Dtnbp1
1733		Kif1b	Klhl7		Phldb3	Vat1	Got1	Arhgdia
1734		Ndufa8	Neurl4		Zfp36l2	Spon2	Gm5616	Psmb10
1735		Nmnat3	Nt5dc2		Chmp2b	Esam	Tbx3os1	Sh3bp5
1736		Carmil2	Pgk1		Epdr1	Elovl1	Phxr4	Anapc15
1737		Zfp664	Sf3b3		Slc44a2	Ifi47	Adora2a	Frrs1
1738		Sgk3	Flad1		Pamr1	Lrrc32	Casp3	Gm10263
1739		Cacul1	Rps15a		Cnn1	Gm16685	Herc6	Nubp1
1740		Med13l	Hnrnpc		Klf5	Fam162a	Hnrnpa0	Rps19
1741		Mrpl57	Ccny		Pear1	Pls3	Nol10	BC017643
1742		Cxx1b	Sgk3		Pelo	Stx2	Cr1l	Cntrl
1743		Prpf38b	Srp72		Cnn2	A330017A19Rik	Bach1	Ddx54
1744		Jund	Gm16286		Shmt2	Agrn	Ripk1	Ptp4a2
1745		Arid1a	Dnlz		Mycl	Scara3	Zeb2	Cdc42
1746		Cox4i1	Alg11		Ctnna1	Apold1	Ywhab	Nit2
1747		Xpo6	Psmd9		Gm10053	Ccdc141	Klf16	Tmem176b
1748		Anapc13	Entpd3		Pim1	Myo1h	Cggbp1	Arap1
1749		Krit1	Strip1		Grpel2	Kif21b	Pwwp2b	Trps1
1750		Ppp3cb	Ankrd24		Haus4	Gm6498	Cygb	Itpr2
1751		Vamp7	Opa3		Tcaf2	Cdc42ep4	Ddx3y	M6pr
1752		Cst6	Mtmr6		Mvb12b	Dmd	Ppp1r2	Rpl22
1753		Kcnb1	Glrx3		6030419C18Rik	Chsy1	Ppt2	Npm3
1754		Evi5	0610012G03Rik		X0610037L13Rik	Tm4sf1	Gnai2	Snrpg
1755		Coa4	Snrpa		Pdgfd	Cml1	Smim12	Dnase2a
1756		Zc3h14	Psmb2		Cd151	Pdgfc	Ddx58	Prdx5
1757		Foxk1	Ube4b		Gm4631	Txnrd3	Cyth1	Phlda1
1758		Tomm5	Aldh9a1		Hyal2	Gbas	Fam117b	Nhp2l1
1759		Isca2	Cox4i1		Pnrc1	Vcam1	Zcchc14	Ppcdc
1760		Senp5	Med14		Sipa1	Nthl1	Vasp	Neil3
1761		Hnrnpdl	Gpr137		Gnal	Rec114	Psmb10	H2afz
1762		Pkd1	Nfkbiz		Ets2	Tmem41a	Fkbp7	2310036O22Rik
1763		Man1a2	Mbd2		Ltbr	Smpd3	Cflar	Myeov2
1764		Kdm1a	Tmem167		Myo19	Il11ra1	Rbm19	Ehd4
1765		Rad17	Dpm2		Sertad4	Litaf	Syne1	Eif3f
1766		Pop7	Cr1l		Arhgef19	Pole4	Socs5	Rpl7a-ps5
1767		Nudcd3	Commd3		Sfrp1	Zfp703	Ets2	Mfhas1
1768		Psenen	Usp19		Apobr	Ercc1	Fjx1	Nudt9
1769		Tbcc	Gsk3a		Ctdsp1	Fam212b	Cxcl1	Ybx1
1770		Coq2	Cks1b		Pdxk	Zbtb16	Plk3	Tapbp
1771		Ap4s1	Anapc2		Ube2v1	Nid2	Asun	Gapdh
1772		Tmem55a	B230219D22Rik		Slmo2	Blvrb	Pparg	Rpl32
1773		Tlk1	Sec11a		Anxa1	Slc24a3	Zfp64	Sh3kbp1
1774		Sep15	Trappc10		Tm4sf1	Wnt5b	Bag3	Pddc1
1775		Ube2e1	Oraov1		Slc46a1	Fxyd5	Bloc1s4	Asnsd1
1776		Selk	Rpl27a		Gstp1	Spry4	Noct	Acot9
1777		Phf5a	Alyref		Gm26510	Tubb6	Stk40	Serpinf1
1778		Stk16	Ganab		Sestd1	Socs1	Tfpi	Capza1
1779		Mien1	Wdr26		Pim3	Fam175b	Rps6ka3	Igbp1
1780		Dguok	Cib1		Fam149a	Rpl23a	Chd1	Smek2
1781		Nktr	BC004004		Hpgd	Rnd2	Egfl8	Tmem243
1782		Agtpbp1	Nr2f6		Lasp1	Qtrtd1	Enc1	Fam46c
1783		Hadhb	Nt5dc3		Ier2	Cebpa	Fads3	Tonsl
1784		Mrpl17	Cabin1		Pipox	Slc7a7	Psmc3	Rpl27
1785		Ppp2r4	Bag5		Tbc1d25	Lmcd1	Snu13	Ppt1
1786		Psmb3	Wtap		Ly6e	Arhgap28	Anxa1	Rps5
1787		Rpain	Qrich1		Marveld2	2010107G23Rik	Ddx54	Sepw1
1788		Auh	Ebp		Gm3839	Uba52	Smurf1	Rtcb
1789		Kcnq1ot1	Rps20		Pole4	Gm12166	Bcar1	Hk1
1790		Zfp263	Alkbh5		Rpl13a	Gm3716	Rflna	Ccng2
1791		Zcchc17	Sh3gl1		Nr1d1	Ckap4	Tgfb2	Rps8
1792		Eloc	Lamtor5		Bspry	Ahcy	Samd12	Amdhd2
1793		Ankrd44	Elmod2		Adam11	Sdc2	Kdelc1	Ubac2
1794		Drg1	Pigq		Piezo1	Ifngr1	Ddi2	Txn1
1795		Dnm1l	Mlf2		B3gnt2	Il18r1	Rbp1	Rps12-ps3
1796		Kmt5b	Tmem55b		Tmem136	Tuba1c	Foxo1	Tctex1d2
1797		Vipas39	Reps1		Gm4076	Rnf122	X4930453N24Rik	Spsb1
1798		Bicral	Slc37a3		Mdfic	Fosl1	Zbp1	Cfl1
1799		Snrnp27	Clint1		Trabd2b	Hmha1	Hmbox1	Zfp710
1800		Cars2	Trmt1		Olfml2a	Gdf15	Slc8b1	Ldlrap1
1801		Serf2	Cox8a		Tpm1	Fam53b	Arl5b	Ckb
1802		Zfp771	Stard7		Il17rc	Ttll12	Pak1ip1	Comtd1
1803		1110038F14Rik	Lrrc47		Sbk1	Triobp	Sqstm1	Hsd17b11
1804		Rps19bp1	Vps18		Ahnak2	Sh2b3	Gas2l1	Twf2
1805		Znhit3	Rpl18		X0610009B22Rik	Rasl10a	Ufd1l	Relb
1806		Asap1	Sec24c		Ttyh3	Cbr3	Ssh1	Setdb2
1807		Armc8	Elk4		Zfp433	Smek2	Ehd1	Msra
1808		Scrn1	Narfl		Nacc2	Cp	Smurf2	Pvr
1809		Fkbp4	Slc36a1		Ppp2cb	Wsb1	Cenpb	Rbbp8
1810		Adrbk2	Fbxw2		Dusp1	Fam63b	Myo10	Hspa1a
1811		Pcca	Slc25a53		Fam83h	Cenpa	Fzd8	Rpl36a
1812		C1galt1	Tmem50a		Wtip	Cxx1a	Frmd4a	Borcs6
1813		Yes1	Csnk2b		Tulp2	Frmd8	Bgn	Impdh2
1814		Sergef	Gemin7		Rnd1	Mospd1	Stat6	P2ry12
1815		Lsg1	Anapc5		Srms	Gm10073	Osgin1	Rpl39
1816		Dxo	Mcts1		Slc19a1	Bmp1	Spata6	Pih1d1
1817		Ccdc186	Ak2		Panx1	Dzip1	Capn2	Rps16
1818		Gnpda2	Cdc5l		Gab1	C2cd2	Arpc2	Jak2
1819		1190007I07Rik	Xpo6		Ak3	Cxx1b	Hnrnpf	Rps12
1820		Akr1b10	Mtss1		Socs3	Psrc1	Rpl13a.ps1	Iqgap1
1821		Gatd1	Mrps34		Dydc2	Fut11	Gne	Spg21
1822		Mios	Snx19		Grwd1	Fam63a	Limch1	Arpc5
1823		Zzz3	Malsu1		Fgfr1	2310015A10Rik	Daxx	Rplp2
1824		Dnajc19	Mtg1		Tmem120a	Setd8	Arhgdia	Fuca2
1825		Ttll7	Tufm		Rhob	B4gat1	Map3k20	Ifitm2
1826		Rps6kb2	Srsf6		Mob1a	Smpdl3b	1700020I14Rik	Ddx21
1827		Zfp810	Mtx1		Gm26619	Slc25a24	Crip1	Tsc22d3
1828		Golga2	Golga7		Klf3	Adap1	Pitpnc1	Dbnl
1829		Golga5	Lcmt1		Dram1	Rab34	Slbp	Ilvbl
1830		Washc5	Elavl1		Rnd3	Ifi27	Actr1a	Snx18
1831		Mfn1	Nudcd2		Eps8l2	Kitl	Gm10126	Ccdc53
1832		Tmem222	Glg1		Adat2	Rbm38	Ncoa3	Rps25
1833		Prkce	Commd7		Map3k9	Ctdsp1	Mnd1	Raly
1834		Focad	Eid1		Tspan8	U2af1l4	Rnf122	Rps15
1835		Synj1	Diablo		Mcm3	Col15a1	Erf	Slc35c2
1836		Tfam	Chmp7		Ahr	Blvra	Sept11	Bach2
1837		Rasa1	Tspyl4		Spats2l	Fam177a	Donson	Tap2
1838		Cyb5r3	Ldlr		Carns1	Sept1	Sypl	Snrpb2
1839		Mtss1	Tsc1		Tmem176a	Slc26a11	Arhgap18	Rps28
1840		Cntln	Ubl4a		Usp50	Tmed1	Kif13a	Rps4x
1841		Gatad1	Pip4k2c		Impdh2	Fam179b	Fancg	Fam53b
1842		Rab37	Cab39		Dag1	Adam23	Mgat4b	A930007I19Rik
1843		Ccni	Tfam		X1110001J03Rik	Tmem98	H2-K1	Ramp3
1844		Ap3s2	Tmem64		Palm	Chek2	Eif6	Rpl10a
1845		Nedd4	Pkib		Cers2	Plpp3	Plcl1	Vrk2
1846		Phf1	Picalm		Ptprs	Ints5	Otud1	H2-Q4
1847		1700019D03Rik	Mkrn1		Tubb5	Abcg2	Snx9	Abcd1
1848		Ythdf3	Mfsd6		Gm6498	Samd4	Slc25a24	Pea15a
1849		Smad4	Mthfsd		Dmrta2	Atoh8	Spred2	Nsa2
1850		Bclaf1	Pef1		X2310011J03Rik	Csdc2	Il20rb	Klhl5
1851		Ddr1	Pold4		Phf11d	Pknox2	Sulf1	Ralb
1852		Hspb11	Htatsf1		Ptgs2	Nutf2	Slc39a1	Dcxr
1853		Prr14l	Dnajc2		Inhba	Arhgap15	Wipf1	Phactr2
1854		Gripap1	Arpc5l		Pkp2	Cdc42ep1	Dennd5a	Snap23
1855		2300009A05Rik	Tbcb		Pi4k2b	B4galt2	Pde4a	Gadd45b
1856		Pi4ka	Sys1		Mta2	Batf2	Apaf1	Ncoa3
1857		Plpbp	Ndufb2		Naaladl2	Igdcc4	Acsl5	Ube2l6
1858		Xpo1	Zfp950		Selk	Gm10250	Pdcl3	Myl12a
1859		Mtf1	Sacm1l		Lig1	Fam134c	Cdk11b	Kpna4
1860		Cdc27	Stat5b		Pomk	B4galt1	Znfx1	Git2
1861		Mrps15	Rasal2		X4833439L19Rik	X1810022K09Rik	Relb	Tpm4
1862		Stxbp6	Nfe2l1		Acer3	ago.02	Eno1b	Plk2
1863		Fam45a	Gpr27		Arhgap27os1	Gm5177	Crtc2	Sgpl1
1864		Ttbk2	Ypel2		Chka	Rin3	Sav1	Nfya
1865		Top1	Pkd2		X0610011F06Rik	Gm10053	Lmna	Rpl17
1866		Ankrd12	Ap1s2		Gadd45a	Nfatc2ip	Rasal2	St3gal4
1867		Hbs1l	Wdr24		Zfp623	Mfhas1	Hmg20b	Supt4a
1868		Sumo1	Scly		Plk2	Ly6k	Gucy1a1	Sptlc2
1869		Cdc123	Fam174a		Pak1	Rpl21.ps4	Plcg1	Cflar
1870		Nipa2	Prkag2		Ypel1	Laptm4a	Coq10b	Pkn1
1871		Stk11	Rps10		Smarcd2	Tgtp2	Cfh	Rsu1
1872		Kbtbd3	Slc35a2		Mcl1	Rab43	Tubb5	Rps27
1873		Uqcr10	Trafd1		Gm26802	Nhp2	Snhg5	Clic4
1874		Pkia	Idh1		Plac8	Lix1l	Rnf152	Tmod3
1875		Gnl2	Rpl13		Stx11	Nlgn3	X4833420G17Rik	Sri
1876		Ralbp1	Rc3h2		Gm12454	Socs3	Usp21	Wdr1
1877		Brms1	Erp44		Ctf1	Lipa	Maml1	Naa10
1878		Suclg2	Abhd6		Dctd	Tceb3	Purb	Eif4a1
1879		Usp31	Serinc5		Aplp2	Mirt1	Zfp131	Cyb5r4
1880		PISD	Hif1a		Arhgef5	Plod1	Gm10263	Rpl23
1881		Ndufs3	2510002D24Rik		Chtf18	Rnaset2a	Fkbp1a	Hnrnpf
1882		Gadd45g	Prkaa1		Hacd4	Osbpl5	Calm1	Rac1
1883		Mast3	Chchd7		Pabpc1	Gm10031	Rqcd1	Tsc22d4
1884		Ndufaf7	Mfsd13a		Stt3b	Cdc6	Tfeb	Rps15a
1885		Cald1	E2f4		Nfatc1	Dram1	Shf	Ppp2r4
1886		Lyst	Timm17b		AI846148	Sbno2	Tmem106a	Rpl9-ps6
1887		Sdccag8	2610507B11Rik		Rnaset2a	Paox	Dpy19l1	Smim12
1888		Pex13	Gpn1		Hdgf	Sox5	Atp1b3	Rplp0
1889		Myo18a	Rpl8		Fhod1	Thra	Myl9	Slc25a33
1890		Ikzf2	Usp10		Grn	Gltp	Itgb5	Rplp1
1891		Lmbr1	Nipsnap3b		Tcea3	Htra2	Numb	Rps7
1892		Nkiras2	Mtch2		Gins1	Nutf2.ps1	Secisbp2l	Tceb1
1893		Uty	Pmm2		Midn	Klhl5	Nxpe4	Arl6ip1
1894		Wdr26	Rab37		Abhd11	X2410006H16Rik	Prickle3	Hmgcl
1895		Trim44	Mrpl50		Slc38a1	Adam12	Reep3	Sh2b3
1896		Immp1l	1810058I24Rik		Slc16a5	Wwtr1	Casp6	Ifi35
1897		Egr1	Otud7b		Mcm7	Rnf26	Trim34a	Qk
1898		Slc25a11	Ccz1		Paox	Flrt3	Pfkp	Utp14a
1899		Wdr60	Cic		L3hypdh	Spred1	Tmem109	Gyg
1900		Memo1	Ube2s		Rara	Ifngr2	Ybx3	Hspa8
1901		Copz2	Knop1		X6030458C11Rik	Hmox1	Tnk2	Rpl3
1902		Prkdc	Lrp3		Rps27rt	Sat1	Rbbp9	Aebp2
1903		Zfpl1	H2-Ke6		Abhd4	Prosc	Abhd17a	Tubb6
1904		Rad23a	Supt6		Trip13	Prkd3	Nop53	Dusp6
1905		Zmym5	Taok1		Slc22a5	Pabpc4l	Adgra3	Rnaseh2c
1906		Cdc37l1	Apopt1		Bdh2	Cnpy4	Ick	Rnpep
1907		Dnajc18	Tmem63b		Kdf1	Glis2	Sos1	Rps6
1908		Pomc	Mien1		Gan	Rpl10-ps3	Sdcbp	Rab30
1909		Mapkap1	Usp33		Dpf1	Kif1c	Ccnl1	Bscl2
1910		Tctn3	Edrf1		Csnk1e	Fmo2	Flna	Bcl10
1911		Syn2	Heatr5a		Trim8	Bcl9l	B3gnt3	Socs6
1912		Rrnad1	Zdhhc6		Nfatc4	Ilk	X1810037I17Rik	Kdm6b
1913		Gapvd1	Enah		Mpnd	Serpinb9	Plscr3	Cln5
1914		Dhx40	Acbd6		Mutyh	Shisa4	Brd2	Rps23
1915		Gstm4	Ccdc124		Gm561	Slc2a1	Rps12.ps3	Atp1b3
1916		Aamp	Spty2d1		Cited4	Nme3	Klhl2	Myc
1917		Agbl4	Emc3		Capn5	X1110008F13Rik	Arid5b	Ocel1
1918		5730455P16Rik	Atp1a1		Itgae	Cyb5a	Elf2	Rpl12
1919		Rpgrip1	Tmem108		Ecscr	Gm28062	Sh3bgrl3	Rpl4
1920		Kcnj11	Sdhb		Cadm1	Efnb1	Mindy1	Anxa3
1921		Zranb1	Ifi35		Ppm1j	Prex2	Tor1aip1	Bcl2
1922		Pdap1	Plcxd3		Sned1	Phyhip	Flywch1	Bnip2
1923		Ints8	Zfp260		Itga9	Fam161a	Ubald2	Srgap2
1924		Creb3l2	Upb1		Gm26569	Pdlim7	Bloc1s1	Rps18
1925		Nme1	Atp6v1d		Vamp5	Rdh12	Ablim1	Aprt
1926		Zfp322a	Kif1a		Proser3	Gm12355	Plscr1	Zc3hav1
1927		Fbxo8	Rer1		Rrs1	Cdkn2c	Pdia5	Eef1a1
1928		9030624J02Rik	Tes		Vimp	Pvrl3	Ddx39	Nt5c
1929		Bcas2	Ube2f		Pgd	Clip3	Ttc23	Sh3glb1
1930		Fam96b	Snip1		Atf7	Stat6	Slc25a25	Rab31
1931		Afdn	Gins4		Tmem43	Vwa7	Tbcc	Sqstm1
1932		Fancm	Tmem80		X1110065P20Rik	Ctsh	Arpc4	St8sia6
1933		Ctsf	Acox1		Myo1h	Fmnl3	Wdr73	Eps15
1934		Pbdc1	Txnl1		Fah	Carhsp1	Smchd1	Akr1a1
1935		Ubn1	Chuk		Ruvbl2	Myl12a	Dbn1	Ppp4c
1936		Slc20a2	Cherp		Selm	Pald1	Ift122	Irak3
1937		Sgsm2	Dctpp1		Pnp2	Fam134a	Gm8624	Oser1
1938		Hnrnpr	AU022252		9930012K11Rik	Bicd2	Cdr2	Fbl
1939		Fam114a2	Tardbp		Cd1d1	Tfeb	Arhgdib	Ifi44
1940		Cnep1r1	Pfdn6		Klf16	Traip	Mpp1	Mpp6
1941		A430005L14Rik	Sbno1		Afmid	Ptprs	Tpra1	Gm28875
1942		Arl2	C1galt1c1		Aebp2	Ankrd50	Dynll1	Naa50
1943		Dach1	Atxn7		Timp2	Btbd19	Rpain	Gm9493
1944		Rabep1	Gpr108		Alox12	Scn2b	Itm2b	Mkl1
1945		Impad1	Lpgat1		Sowahb	Stx11	C1s1	Esd
1946		Akap9	Rars		Polr1a	Kcna5	Arl15	Hspa1b
1947		Ganc	Ap2a2		Synpo	Cdk6	Impdh2	Tob2
1948		Kif5c	Ap2m1		Bri3bp	Tbxa2r	Snap23	Apoa1bp
1949		R3hdm2	Copg1		Fcgrt	Pacsin2	St3gal6	Shtn1
1950		Ppp6r3	Ak6		Gpc1	Gm43848	Arhgap17	Rps14
1951		Nsf	Ncdn		H2-Q4	Sash1	X1810022K09Rik	March2
1952		Tmem11	Eif2b2		Paics	Prmt10	Trim12c	Vps26a
1953		B230219D22Rik	Nf2		Cd2ap	Mr1	Pde7b	Ube2i
1954		Nufip2	Slc25a12		Gm26852	Mb21d1	Cd47	Smpdl3a
1955		Ulk2	Cog2		Prelp	St3gal1	Adam17	Pgap2
1956		Coq9	Dpp8		9330185C12Rik	B3gnt2	Parp12	Foxn2
1957		Galnt11	Ppp6c		Tgfbr2	Tmppe	Emid1	Usp25
1958		Esyt2	Slc37a1		Pygo2	Tirap	X4932438A13Rik	Junb
1959		Hspb1	Mau2		Wdr89	Gja5	Lima1	Rps3
1960		Tmem250-ps	Vti1b		Gmnn	Rac3	Skap2	Tmbim1
1961		Pcnx3	Amz2		Epb41l4a	Jam3	Nov	Slc44a2
1962		Gm3294	Cxxc1		Bid	Gm10263	Ano1	Lrp10
1963		Rc3h2	Ywhaz		Fbxo5	Wwc2	Abhd4	Prelid1
1964		Cdadc1	Nop56		Il10rb	Tbc1d10a	Tbk1	Rps20
1965		Uhrf1bp1l	Qsox2		Kctd10	Ufd1l	Ccdc94	Pacsin2
1966		Srf	Tmco1		Slco4c1	Epha1	Gas5	Vrk1
1967		Klhl28	Pom121		Slc8b1	P2ry2	Topbp1	Ccnl1
1968		Tceb2	Ubqln2		Vav2	Dbi	Tmppe	Rpl21
1969		Hivep1	Ndufa5		Zmynd10	Psme2b	Tsc22d3	Tspan4
1970		Dock9	Pdia4		Slc15a2	Calu	Cmtm6	Selk
1971		Ddx6	Ccpg1		Ehd2	Aprt	Mpzl1	Prkch
1972		Arfip1	Trappc13		Igf1	Commd5	Colec12	Sep15
1973		Camta1	Cltb		Tkt	Rpl35	Kdelc2	Sertad2
1974		Zfp738	Smarcc1		Ccdc64	Bok	Metrnl	Eri1
1975		Usp9x	Tsfm		Cln8	Parm1	Synj2	Leprot
1976		Pafah1b2	Dffa		Mex3c	Nadk	Tlcd2	Rpl28
1977		Polr2i	Ccnh		Aldh1a2	Emid1	Wbp1l	Rpl35a
1978		Nek9	Zfp593		Fignl2	Rqcd1	Mcm6	Ywhah
1979		Sirt4	Zc3h7a		Gstt1	Sord	Nudt4	Mbnl1
1980		Fam219a	Rpl7		Spata2	Ubtd1	Zfp36l2	Ppib
1981		Ptgr2	Ppp2r5c		Pbld2	Adora2b	Rit1	Rnf13
1982		Rfc1	Ccnt2		Cpsf4	Calcrl	Chst14	Cct4
1983		Phf3	Tvp23b		Spry2	Sgce	Crybg3	Stx4a
1984		Rpf1	Dlat		Gm43714	Lhpp	Dnajc8	Dnajb1
1985		Mrps11	Arpin		Cmtm3	Il18	Atp1b2	Ssh2
1986		Impact	Ggt7		Cnnm4	Iqsec1	Hgs	Arhgap18
1987		Apba1	Syt7		Gm10073	Cenpt	Nadk	Chsy1
1988		BC005561	Phpt1		Dpysl3	Nme2	Samd9l	Rpl34
1989		Mgat3	Slc43a2		C030039L03Rik	Arhgap29	Zfp830	Elovl1
1990		Caprin1	Ech1		Nedd9	Il15	Pml	Chmp4b
1991		Uba3	Copb1		Mocs1	Fads1	Mfap3	Ccdc50
1992		Tuba1c	Ptp4a1		Zyx	Rsu1	Zfp384	Brk1
1993		Snx14	Nkx2-2		Rap2b	Rnft1	Gm10053	Wasf2
1994		Kidins220	AW209491		Aco1	Zfp46	Prelid2	Nr1h2
1995		Ckmt1	Ppia		4930579G24Rik	Cirh1a	Taf13	Rpl14
1996		Bcl9	Bcl7c		Fa2h	Plec	Dync1i1	Snx29
1997		Atg4a	Numa1		Pcsk5	Fez2	Tprgl	Ramp1
[truncated: 7,508 more rows]

## Sheet: Supplementary Table 2
Supplementary Table 2. Human pancreatic islets 10x single-cell RNA-seq clustering using Seurat. Cell cluster markers (adj. P-value<0.05) ranked by Average log2 fold change.
Marker #	β	α	δ	γ	Acinar	Ductal	Stellate	Endothelial	Immune
1	INS	GCG	SST	PPY	PRSS1	SPP1	COL1A1	PLVAP	HLA-DQA1
2	DLK1	LOXL4	LEPR	GPC5-AS1	REG1B	CRP	COL1A2	ENG	S100A8
3	IAPP	CRYBA2	RBP4	CARTPT	REG3A	CFTR	COL3A1	THBS1	LAPTM5
4	NPTX2	TTR	BCHE	SLITRK6	CTRB2	CEACAM7	COL6A3	RGCC	HLA-DQB1
5	MAFA	PLCE1	RGS2	THSD7A	CLPS	MMP7	SFRP2	FLT1	RETNLB
6	ADCYAP1	CRH	PRG4	ETV1	PNLIP	AQP1	BGN	ESAM	TYROBP
7	WSCD2	IRX2	HHEX	CALB1	CELA3A	SERPINA5	DCN	SERPINE1	FCER1G
8	PFKFB2	VGF	FRZB	SERTM1	REG1A	KRT19	SPARC	PECAM1	C1QC
9	HADH	F10	FFAR4	PEG10	CPA2	TSPAN8	LUM	PODXL	ALOX5AP
10	PDX1	GC	DHRS2	SLC6A4	PRSS3P2	SLC3A1	TIMP3	ESM1	C1QB
11	C1orf127	PCSK2	PCSK1	AQP3	CTRB1	ALDH1A3	MMP2	KDR	C1QA
12	RGS16	SLC38A4	LY6H	CHN2	CPA1	CEACAM6	PDGFRB	PASK	APOE
13	ENTPD3	PAPPA2	GABRB3	MUC3A	CTRC	LGALS4	COL6A2	FABP4	LRMP
14	CYYR1	GLS	F5	MEIS2	CPB1	CCL2	FN1	CD36	SRGN
15	SAMD11	RGS4	ANK1	SYNPO2	PRSS3	CLDN10	IGFBP4	ANGPT2	CD74
16	PCSK1	GPX3	GHSR	LMO3	PNLIPRP1	SERPING1	THBS2	CXCR4	ACP5
17	SYT13	FXYD5	LRFN5	CARD11	CELA3B	KRT23	COL15A1	CLDN5	LSP1
18	TGFBR3	TM4SF4	BAIAP3	ADAMTSL2	PNLIPRP2	APCS	COL5A1	SLCO2A1	HLA-DRB5
19	IGSF1	FAP	PKIB	ID2	CELA2A	TINAGL1	FMOD	S1PR1	LCP1
20	SIX3	PDK4	EYS	SPOCK1	ALB	VCAM1	IGFBP5	MMP1	CCL4
21	GPM6A	KLHL41	EDN3	CDH17	PLA2G1B	SLC4A4	SPON2	CD93	ARHGDIB
22	C1QL1	ARRDC4	SEC11C	STMN2	MT1G	AMBP	IGFBP6	APLN	S100A4
23	CAPN13	PEMT	TENM3	PXK	GP2	KRT7	MMP11	STC1	CD52
24	ERO1B	DPP4	HEPACAM2	ENTPD2	SYCN	CLDN1	AEBP1	THBD	HLA-DMB
25	BMP5	SMIM24	CASR	DPYSL3	CELA1	ANXA4	CYGB	F2RL3	RAC2
26	FAM105A	SLC7A2	PIPOX	PTGFR	CEL	PIGR	COL6A1	MCAM	RGS1
27	GPSM1	FAM84A	MS4A8	KIAA0319	REG3G	PPAP2C	COL4A1	GNG11	CORO1A
28	G6PC2	KCTD12	AMIGO2	PCDH10	ALDOB	DEFB1	THY1	VWF	AIF1
29	NKX6-1	CHGA	CBLN4	GRAMD1B	ZG16	CTSH	LOXL2	PPAP2B	CD53
30	PRSS53	EGFEM1P	PCP4	INPP5F	CTRL	CLDN2	GPNMB	ACVRL1	SAMSN1
31	SSTR5-AS1	POPDC3	HADH	SCGB2A1	SPINK1	HSD17B2	ISLR	PTPRB	HLA-DMA
32	TSPAN1	MAFB	UNC5B	SEMA3E	GSTA2	VTCN1	COL5A2	LAMA4	IFI30
33	SUSD4	PTPRT	CDHR3	KCNJ8	CXCL17	CXCL6	CTSK	CLEC14A	CD68
34	CASR	FXYD3	GABRG2	MEIS1	LGALS2	TACSTD2	VCAN	ELTD1	IL1B
35	LRRTM3	CD99L2	LOC728392	PLEKHB1	RNASE1	PMEPA1	LAMC3	IGFBP3	CTSS
36	CYP2U1	C10orf10	PSIP1	ABCC9	KLK1	LCN2	COL4A2	DLL4	LTC4S
37	NEFM	SPOCK3	ACSL1	CNTNAP5	ANPEP	ANXA3	POSTN	PRDM1	CXCL3
38	SIX2	GPR119	STXBP5L	ELMO1	MT1H	TRPV6	PLAT	ERG	ITGB2
39	SCD5	CHGB	CABP7	APOBEC2	TFF2	PDLIM3	LGALS1	RBP7	RGS10
40	ASB9	SLC22A17	DPYSL3	CHRM3	PDIA2	SERINC2	MXRA8	PCAT19	TOP2A
41	FAM159B	SLC7A8	SLC17A6	ID4	BCAT1	FLRT2	PXDN	CLIC2	PTGS1
42	KCNQ2	TMEM176B	UCP2	PRKACB	LYZ	KRT17	HTRA3	TCF4	CYBB
43	CDH22	PDE3B	NDRG4	AKAP12	IL32	PRSS8	CRIP1	CARD16	RUNX3
44	MAPT	ALDH1A1	TMED6	FAM159B	GSTA1	LAD1	F2R	TM4SF18	HCK
45	PLCH2	FXYD6	ERBB4	GLT8D2	DUOXA2	CXCL8	HEYL	EMCN	CAPG
46	GCGR	PYROXD2	CD72	FAM69B	AKR1C2	MUC20	MGP	COL4A1	CD300A
47	ZC3H3	FSTL5	ISL1	NR0B1	RARRES2	TNFAIP2	DKK3	ROBO4	CCL3
48	VAT1L	SERPINE2	TPPP3	SCG2	MGST1	KRT18	NID1	ITGA5	HPGDS
49	UCHL1	TMEM176A	NSG1	GAS2	ADH1C	SDC1	CLEC3B	NRP2	MKI67
50	KLHDC8A	FEV	DIRAS3	SLC6A17	MUC1	CD44	NOTCH3	CLIC4	NUSAP1
51	SNCB	RESP18	ABI3BP	NPFFR2	DUOX2	GPRC5B	PCOLCE	FAM43A	RRM2
52	MEG3	SYNDIG1	SSTR1	LONRF2	AKR1B10	SERPINB2	LTBP1	ECSCR	ITGB7
53	UCN3	SMOC1	ST8SIA4	DIRAS3	CFB	LAMB3	IL11	CALCRL	SPI1
54	APCDD1L-AS1	ADCY1	KCTD8	GFRA1	UBD	SCNN1A	MRC2	SPARCL1	MS4A7
55	GLP1R	KIAA1244	CALB1	PON3	AKR1C3	ANXA2P2	ACTA2	CDH5	PTPRC
56	SORL1	ASXL3	CNGA3	NPW	TCN1	CRYAB	CDH11	HTRA1	CFP
57	SLC2A2	MOB1B	PLEKHB1	PAX6	GATM	KRT8	TNFAIP6	TMEM173	CD37
58	ATP2A3	GPR64	VAT1L	DDC	ERP27	PROM1	TGFBI	KCNE3	FGL2
59	ELMO1	PPP1R1A	TMPRSS6	ARX	AMY2A	ANXA2	CRISPLD2	GPR116	CSF1R
60	ROBO1	C2CD4B	AQP3	TMEM130	C3	HSPB8	SERPINH1	TIE1	UBE2C
61	ANKRD23	CALY	HAP1	CACNA1D	FGL1	ONECUT2	SERPINF1	TMEM204	IRF8
62	FFAR1	PTPRN2	C22orf42	FOXP2	MT2A	LAMC2	SNAI2	CD34	HCLS1
63	GAD2	RFX6	SVOP	FGFR1	OLFM4	ABCC3	INHBA	TP53I11	ARHGEF6
64	SLC25A34	KIAA1324	SLC4A8	C16orf45	DPEP1	CDC42EP1	PRELP	AFAP1L1	NCF4
65	CHST8	ARX	SORL1	KCNH6	SERPINA3	S100A14	IFITM1	GIMAP4	TMSB4X
66	FFAR4	ELL2	PCK1	BMF	AMY1A	CAV2	CALD1	NKX2-3	CDK1
67	P2RY1	EGFL7	FHOD3	FXYD2	TC2N	NEURL3	CD248	MMRN2	PTTG1
68	NDRG4	IGFBPL1	PHGR1	ABCA2	MT1E	FILIP1L	MFAP5	ETS1	HMGB2
69	HAPLN4	PPP2R2B	RXRG	VIPR1	MT1M	TPM1	MFGE8	MYCT1	PLA2G7
70	PCDH7	GADD45G	EHF	CACNA1H	DMBT1	KLF5	NBL1	COL4A2	TBXAS1
71	TCERG1L	NAA20	LINC00643	ACSL1	C6orf222	CXCL1	FKBP10	PXDN	RFTN1
72	RASGRF1	ABHD15	LPHN2	PCLO	TPST2	LGALS3	FBN1	RAMP2	SASH3
73	SCN1B	PALLD	TMEM130	TMEM47	MXRA5	CYP1A1	PI16	PCDH12	FCGR2A
74	SRXN1	HMGB3	UCHL1	CXXC4	SERPINI2	CD24	TPM2	NOTCH4	CENPF
75	APCDD1L	SLC29A4	PON3	MDFIC	FAM129A	VNN1	C11orf96	ANGPTL2	CRIP1
76	RASD1	SSX2IP	MRAP2	LECT1	F3	CREB5	PMP22	IFITM1	MS4A6A
77	PLCXD3	APOH	PCLO	CABP7	HHLA2	KRT80	WNT5A	LOX	CTSZ
78	ABCC8	COTL1	FGF14	FGD4	C15orf48	ELF3	PLXDC1	IFI16	MYO1F
79	CHL1	KCNIP1	PRKACB	SHISA6	SOD2	ITGB6	RCN3	FAM101B	CD209
80	PIPOX	CPLX2	MAP6	CHD5	AKR1C1	CYR61	PLIN2	PNP	CCRL2
81	TSPAN5	KCNK17	BHLHE41	MS4A8	CA9	ATP1A1	TGFB3	SULF2	TPX2
82	MTUS2	GRIA3	AMPH	PIK3C2G	TMEM97	SAT1	ANTXR1	PTRF	MMP9
83	CLGN	CAMK2G	BMP5	KCNG1	SGK1	HABP2	A2M	LRRC32	LST1
84	ESR1	PGR	CXorf57	CMTM8	MECOM	CA4	LRRC32	FSCN1	PLD4
85	SRD5A1	SERPINI1	IGSF10	ARHGEF3	AZGP1	ANXA9	EDNRA	ARHGAP31	CCNB2
86	ARG2	CNTN1	SAMD5	REG4	SERPINA4	UCA1	HSD11B1	ICAM2	STAB1
87	NPY	HSD17B14	ST6GALNAC5	ATP8A1	CPA4	TM4SF1	MYL9	BDKRB2	PF4
88	ROBO2	SCG5	LRP5	ID1	SLC39A5	APCDD1	ECM1	MEF2C	CDC20
89	PTPRU	CLU	DYNC2H1	HMP19	LDHB	EDN1	SRPX2	DUSP6	BIRC5
90	CCDC109B	SEZ6L2	LCORL	PAM	B3GNT7	CLDN4	AXL	SPRY4	BTK
91	TFCP2L1	CRTAC1	MAP1B	FAM20A	AQP8	UGT2B15	ITGA1	PLPP1	MPEG1
92	FAM107A	SPTSSB	IDS	SDK1	NUPR1	AKAP7	LTBP2	GMFG	GMFG
93	RBP4	SERPINA10	KCNJ2	EFR3B	CXCL2	SOX9	CSRP2	EMP1	TF
94	SMAD9	TMED3	SALL1	NEURL1	AOX1	TFPI2	PRKCDBP	EHD4	GPSM3
95	TRPM5	GCH1	PNMA2	CSGALNACT1	LTB	SOX4	TBX3	SLC9A3R2	GPR183
96	TMEM108	SPINT2	GLT8D2	KCNH2	CA12	WWTR1	MSC	FAM198B	LAIR1
97	TMEM37	KCNJ6	SYT1	TSPYL4	PDZK1IP1	FSTL3	CTHRC1	RELL1	LY86
98	C14orf132	CCDC86	KCNJ8	SLC43A2	IGFBP2	HNF1B	CAV1	ID3	CKS2
99	TRPM3	NPC1L1	WASF3	MMRN1	MT1A	SLPI	NDUFA4L2	ACE	CDCA8
100	HSPB6	A1CF	GCGR	HGD	ZBED6CL	CA2	FSTL1	EFNA1	SMIM3
101	SOCS2	IGFBP2	SLC7A5	TOX	ATP10B	SDC4	COL12A1	EGFL7	PLK1
102	JAKMIP1	KIF12	GAD2	KCNMB2	MUC3A	HKDC1	ITGA11	SGK1	GM2A
103	PPM1E	TMEM178B	KRT40	PDK3	GATA4	CDKN2B	HTRA1	ABI3	TRAF1
104	TMEM150C	SLC7A14	SLC38A1	HPGD	AKR7A3	LITAF	SULF1	A2M	TNFRSF1B
105	DNAJB9	C2CD4A	CA8	SLC18A2	UGDH	SYT8	BST2	DLC1	ABI3
106	SYBU	WFS1	BAMBI	SAMD5	CELA2B	GGT1	PTGDS	PLPP3	MFNG
107	LINC00263	GCNT1	KCNT2	KSR2	CBS	GAS6	SLC1A5	C1orf54	FERMT3
108	DGCR5	ENPP2	FANCF	RALYL	TMC5	SPNS2	EHD2	SPARC	CYBA
109	TMEM132B	VSTM2L	CADPS	TAGLN3	IMPA2	SLC44A2	SERPINE1	SOX18	KLF2
110	FAM115C	C4orf48	GPC5-AS1	MIR100HG	ITIH4	PFKFB3	GGT5	IFI27	MYO1G
111	EXPH5	PYY	MLPH	RNF157	SDC4	SLC34A2	LHFP	KLF2	CENPE
112	RXRG	KCNH6	DCX	SPTB	GDF15	PPP1R1B	UPK3B	HEY1	AURKA
113	CDKN1C	PDK3	LRRC42	CRIP2	GPX2	GDF15	CCDC80	SRGN	PLEK
114	RIMKLA	PCDH17	OPRD1	FXYD2.1	ANXA10	TNFSF10	C1S	NEDD9	CTSC
115	ELAVL4	LPPR1	CADM1	FLRT1	CCL20	KCNK5	SMIM3	SEMA6B	CD83
116	TAGLN3	TP53I13	ASB4	AHRR	SLC43A1	SERPINA3	GEM	RASIP1	RIN3
117	ENHO	C1orf168	MCC	AMOTL1	RAMP1	CX3CL1	LRP1	GPR4	LPXN
118	DHRS2	ITPR1	PLAC8	PBX3	ZFP36L1	DCDC2	CYBRD1	SHANK3	SELPLG
119	SLC6A6	RAB3C	HMGCLL1	CTTNBP2	ANGPTL4	VNN2	MFAP4	HCLS1	GPX1
120	ALCAM	TMEM164	BAALC	FEV	CYB5A	CAPN6	COL18A1	NRP1	CDKN3
121	CPNE4	CHID1	OGDHL	PART1	FAM13A	TNC	LAMA4	ACKR3	IGSF6
122	ARL4D	SYNGR4	CCKBR	NKX2-2	TRIB2	CTSE	GFPT2	GRAP	SIGLEC10
123	LRFN2	PLIN3	MEST	KIAA1377	AMY2B	TSPAN15	FBLN1	ITPKB	CLEC4A
124	RCBTB2	AGT	MIR7-3HG	SUCNR1	CES2	SCTR	GSTM5	TUBB6	PGLYRP1
125	DACH2	NUCB1	APBB1	CACNA1C	VTN	C4BPA	EGR2	DYSF	CCNA2
126	SLC6A9	FKBP2	NAP1L3	PLXNB1	BCL2L15	CTGF	EMP3	ARHGAP18	IER5
127	TMEM215	FKBP11	INSM1	MPPED2	GPRC5A	CMTM7	CRLF1	CD9	RPL18A
128	SIPA1L2	DPM3	SPAG16	EFNB3	DUSP4	TMEM63A	GPX8	HSPG2	C5AR1
129	IGSF11	CNIH3	PKDCC	RASD1	SLC30A2	NOTCH2	TAGLN	CAV1	PRC1
130	RAB15	BTBD11	TPD52	DTNA	LCN2	SEMA6A	COL5A3	ICAM1	ZEB2
131	PRKAR2B	LRPAP1	ICA1L	TMEM59L	NTN4	NDRG2	PAMR1	P2RY6	SLC16A3
132	RGL1	SEZ6L	TGFBR3	ARHGEF28	PTGR1	TNFRSF12A	SPON1	VAMP5	BASP1
133	CCDC67	QDPR	LMO2	REV3L	SLC38A5	GJA1	PTRF	ELK3	LPCAT2
134	TSPAN13	NGFRAP1	KCNIP1	SMIM5	CPM	PDGFD	ANO1	SCARF1	RPL21
135	SLC16A9	RIMBP2	PDLIM4	UNC80	MTUS1	IFIT2	EBF1	TMEM88	TACC3
136	ENO2	EDIL3	FAM102A	SH3PXD2A	GJB1	PDZK1IP1	TGFB1I1	CDH13	LYN
137	PVRL3	SLC30A8	ECEL1	LPHN1	MYC	FLNA	IGF1	CDC42EP2	LCP2
138	TRIM9	CPE	CEP41	PBXIP1	AADAC	DHRS3	COL8A1	CTHRC1	H3F3A
139	CTNNA2	TSPAN7	RASSF6	CPVL	CUZD1	ANKRD1	EMILIN1	LPAR6	HMMR
140	GEM	LEPREL2	BEX1	VWA5B2	SAT1	S100A16	CALU	CCND1	CDCA3
141	RNF187	CACNB2	DFNB31	CADPS	BIRC3	WFDC2	VSTM4	SH2D3C	SLCO2B1
142	SLC35D3	ADCY7	WDR52	PCDH9	CYP3A5	LOC101928100	DDR2	PTPRE	CSF2RA
143	HOPX	UPK3A	TMEM200A	BAIAP3	PACSIN2	SLC15A1	SPOCK1	TMEM255B	CIITA
144	LMO2	PTGER3	KCNH2	AK4	GPR160	TGFA	BMP1	HLX	TNF
145	PEX5L	SMARCA1	AKAP12	BHLHE41	NR5A2	UGT2A3	GAS1	CXorf36	SLC15A3
146	CHN1	VWA5B2	GPR98	MAP1B	CD24	OLFM4	KCNE4	DOCK6	PTAFR
147	SLC30A8	KIAA1377	AK5	LINC00673	RBPJL	CSF1	UNC5B	PLXND1	CCR1
148	RBFOX3	PARM1	ERICH3	LIMCH1	PHLDA1	SMAD3	EMP1	PLEKHO1	DOK2
149	SLIT1	SYT5	CARD11	IL20RA	TM4SF1	ALDH3A2	SPHK1	FZD4	PIK3R5
150	PKIB	PTP4A3	BEX4	LPHN2	HTR3A	SEL1L3	NREP	SOCS3	STK17B
151	CAMKK1	SSTR2	NOL4	DUSP26	DRAM1	RHOC	MYLK	PDGFB	SAMHD1
152	PDE8B	PHLDB3	RUNX1T1	GCNT3	FAM134B	GOLM1	RAB31	TNFAIP8L1	UCP2
153	GRIA4	KCNJ3	PELI1	LINC00948	TCEA3	SLC44A4	RAB34	LXN	CD86
154	KIAA2022	QPCT	PAIP2B	SCN3B	LDHA	ANXA1	LAMP5	DCHS1	ASF1B
155	TSHZ3	ANK2	DMRTA1	ABAT	ACHE	FUT3	S1PR3	NFIB	ARHGAP30
156	PLCB4	MYH10	NCS1	TMOD1	CXCL3	S100A10	LGALS7	EXOC3L2	ARRB2
157	AP3B1	LRP11	CBFB	GUCY1A3	RASSF6	CTSD	MMP14	IFITM2	CSF2RB
158	MNX1	C5orf38	ANK3	RAP1GAP	LGR4	C8orf4	LAMA2	FKBP1A	LILRB4
159	THBD	PLK2	NUDT9	MALAT1	TCIRG1	S100A11	SLC16A1	S100A13	EMP3
160	RNF130	RAB3B	CELF4	RTN1	TMPRSS2	CFI	DPT	FAM167B	KCNE3
161	CNKSR2	MLIP	RIMS2	MLLT3	REEP6	PDP1	GREM1	ITPRIP	BCL2A1
162	CNRIP1	REEP4	ACVR1B	MPP2	KLK11	PVRL4	CCDC102B	ACSL5	AURKB
163	SDK2	GALNT13	LOC642366	GRIA3	XBP1	ADAMTS9	NID2	RAI14	CELF2
164	PIR	IQSEC3	SYT13	PRSS23	ARHGAP18	TSPAN6	PAG1	GIMAP6	RPS26
165	FAM222A	CD82	PNMAL1	TRIM46	CEBPD	AGRN	CYP1B1	BST2	UNC93B1
166	GPRIN3	SCG2	ABCC9	CACNA2D3	TRIM50	CLMN	SLIT2	RGS3	RASSF2
167	PRUNE2	OCRL	EXOC6	LTBP3	OAF	GBP3	ANGPTL2	APOLD1	EVI2A
168	AMPH	LGI3	ABCC5	AKT3	PLTP	PPIC	CD34	IGFBP7	GAS7
169	MLXIPL	FAM46C	EPHX2	RXRG	FGG	SERPINA6	WISP1	ARHGAP29	TREM2
170	VWDE	HPS1	RAB26	SPTSSB	CREB3L1	CXCL16	BMP8A	COL13A1	SLC7A7
171	CCDC110	CNIH2	GCH1	EPHA5	UGT2B15	LIPH	EFEMP1	KANK3	P2RY6
172	LOC154761	MAMLD1	SLC2A13	DPYD	KCNQ1	SEMA3B	TMEM204	ADAMTS4	PLEKHO2
173	DLG2	APLP1	FLVCR1	IL17RB	C4orf19	BACE2	NKAIN4	CLEC1A	RPL36A
174	KCNK16	TMEM86B	PVRL3	EML6	SOX4	C6	GAS7	LIMS2	GNGT2
175	INSM1	RIN2	SYT4	AGTR1	SLC25A37	IER3	UACA	MSN	BST2
176	SCG3	NUPR1L	MARK1	PCSK1N	STEAP3	PIK3AP1	COL7A1	PDE7B	PPP1R18
177	KLHDC5	STAT4	EFNA5	PTP4A3	FBP1	CCND1	PLAU	LRRC8C	LAT2
178	SEMA6D	MCOLN3	MAP9	KCNA5	IFITM3	CXADR	LTBP4	RAPGEF4	PBK
179	ATRNL1	KIF19	NR1D2	DYNC1I1	RASGRP3	F2RL1	ZEB2	EPAS1	KYNU
180	DAPL1	YIPF2	RTP4	PLXNB2	KRTCAP3	TRIP6	MICAL2	WWTR1	DEF6
181	RRAGD	KCNMB2	PAK3	GAD2	LRG1	CYBA	CTSC	ST6GALNAC3	CD84
182	SLC7A5	ENPP1	PARVB	RIMS2	PLBD1	STOM	RARRES2	MGLL	EIF4A1
183	SYNM	SDC2	XYLT1	CAMK2N1	TFPI	HIF1A	PDGFRA	ITGA1	NCF2
184	GCK	CACNG4	OXCT1	IGSF10	GALNT7	PKHD1	VIM	RASGRP3	RNASET2
185	OLFM1	EMC10	PDZRN3	PDE4D	TACSTD2	NR5A2	PDPN	PDE2A	PTPN6
186	MCF2L2	CNNM1	ASCL1	CDH10	B3GNT2	COL18A1	ITGA5	SWAP70	AXL
187	C21orf91	CELF3	DNAJC12	LY6H	GALNT2	KCNJ15	GNG11	ZEB1	ADAP2
188	DNAH5	OSBPL6	MARCH3	UCHL1	RRBP1	ST6GALNAC2	IFI16	IGFBP4	RPL17
189	GPRIN1	HS6ST3	NPHP4	RNF2	ERO1L	SLC38A1	PLTP	MFNG	AHNAK
190	SLC4A10	KIAA1549L	CNTLN	BPHL	RASEF	CHI3L1	WIPI1	CYYR1	HLA-DOA
191	MYO3A	SMARCA2	LRCH2	TTC3	OCLN	RASEF	ADAMTS2	KBTBD2	FGD2
192	KIAA1211	MPC2	APOL6	AKAP9	FTH1P3	BICC1	PLPP3	PRKCH	PYCARD
193	CABP7	LDB2	CHAC1	GNAI1	NFKBIZ	S100A6	RSPO1	TEK	ADRB2
194	ZNF365	CERCAM	SYNE2	NMNAT2	ERV3-1	TMC5	ADAMTS4	RARB	LYL1
195	IL20RA	MAT1A	TMEM17	PRUNE2	CCDC69	TRIM47	OGN	RAMP3	SLC11A1
196	PLEKHA6	HIGD1A	TEAD1	ARSJ	BACE2	NFKBIZ	ENG	UPP1	OSTF1
197	DOCK10	GRM4	SNAP25	EFNA5	EGF	SOD3	MFAP2	CCDC85B	EBI3
198	GREM1	SSR4	RGS9	PNMAL1	RAB11FIP1	TMC6	PTGIS	CDK17	CNN2
199	ITPR3	STK32B	AGTR1	STXBP5	CCL28	RBPMS	PRRX1	TSPAN12	TGFB1
200	MYT1L	BAIAP2L2	PLXNC1	MAP2	SH3BP4	TGIF1	RCAN1	BCL6B	IL16
201	FMO1	PLD3	SCD5	KCNA6	GIPC2	ZFP36L1	COL14A1	DOCK9	SCIMP
202	ADRA2A	NECAB2	GPR123	KIAA1549	TSKU	NFIB	ANGPTL4	LDB2	EFHD2
203	KCNG3	PCSK1N	ST18	APLP1	MET	NCEH1	SEMA3C	KIAA1462	CYTH4
204	SYT7	C1orf122	HDAC9	ST3GAL6	ATHL1	HYAL1	SNAI1	MFAP3	DUSP6
205	TMCC3	ABCG2	SLC2A12	DDR1	MSRB1	STK17A	IL6	SNCG	RPS29
206	KIAA1644	PHTF2	FAM167A	KLHL3	SEL1L	SLC43A3	COL16A1	SNAI1	GPR132
207	CCDC88C	H2AFJ	C9orf135	ALPK3	FAM3B	EPS8	RARRES1	SEC14L1	THEMIS2
208	PKP2	REC8	PRSS23	VPS13B	FAM107B	H19	ITGB3	RHOJ	BIN2
209	LINGO2	COX8A	SFXN5	LOC728392	SSFA2	CXCL2	TMEM119	SLC16A1	INPP5D
210	CDK5R1	NME4	TANC2	SPRYD3	LIMA1	LRG1	C1R	FMNL3	MAP3K8
211	SH3GL2	CNTN4	SMIM6	LPPR4	PDGFA	SLC12A2	LHFPL2	EBF1	SLA
212	RASGRF2	NENF	FMN2	BCOR	HLA-DMA	KIAA1522	LOX	PEAR1	TM6SF1
213	UPP1	MAN1A1	CDK14	XPR1	ATP8B1	SPTBN1	LXN	ITM2A	EMILIN2
214	PLCL2	TMEM59L	CYFIP2	PDE3A	PGM2L1	IDH2	PAPPA	ARHGEF15	PLEKHO1
215	GDAP1	BSG	UNC80	TMEM86B	GPT2	RHOV	PIEZO2	NOTCH1	PIM1
216	GJD2	TXNDC11	SLC9A9	NAV1	PTF1A	MARCKSL1	CALHM2	SERPINH1	RPL39
217	TTC7B	HLA-A	TMEM53	EHBP1	PRSS8	ITGA2	PTGS1	FLT4	ND1
218	RAPH1	SPC25	CAMK2B	ABCB1	MAP3K5	CITED4	PHLDB1	RAPGEF5	VSIR
219	RAB39B	MTMR7	ASPDH	NRXN1	GGT6	DAB2	SULF2	HEG1	TNFAIP8L2
220	TMOD1	ATP5E	RASGRP1	EPB41L3	ZNF503-AS1	SFRP5	STC1	IFITM3	RPS7
221	ANKRD6	ASPH	CNIH2	ROGDI	FUT1	SLC1A1	NUPR1	DOCK4	RPS9
222	ZNF540	KCNA5	SAMD3	MAPK8IP2	INSR	JUP	IFITM3	SEMA3F	SIRPA
223	CABLES1	TBC1D30	SESN3	TUBB2A	IL8	CCL20	ANTXR2	DAB2	RHOG
224	SLC8A1	PIGT	CELF6	DMD	STEAP4	LGALS9	STEAP1	EPHA2	AKNA
225	MAP1A	PTPRN	PROX1	DAAM1	SPATA13	IFITM2	SRPX	CXCL12	BATF3
226	SYNDIG1L	PPM1K	FAM84B	GSE1	BAIAP2L1	RAMP1	PDE1A	PLEKHG1	LPAR6
227	ALOX5	CRELD1	QDPR	AHR	PSAT1	HES1	PLAUR	SMAD6	TGFBI
228	SCRT1	ANG	SSTR2	SPIDR	SLC22A23	HLA-DRA	PLXDC2	ARHGDIB	ARHGAP25
229	ACTR3B	CFC1	CORO2A	ITM2C	LOC100422737	LURAP1L	HMOX1	KLF4	RPSA
230	UBE2QL1	KCNK16	AGPAT6	IL13RA2	KIAA1522	SERPINA4	GSN	STOM	COTL1
231	PFN2	DGAT2	SIDT1	ARNT2	GULP1	ERBB2	FXYD1	C11orf96	CCR2
232	SRPRA	MLLT11	NBEA	CACNA2D1	PBLD	NR1H4	FIBIN	LRRC8A	PTPN18
233	SYT14	CYSTM1	MYT1L	DEPTOR	SLC12A2	RCAN1	TRPV2	FABP5	GLIPR1
234	GNAS	SEPT3	ASCL2	SVOP	FUT2	ACTN4	SLPI	SLC43A3	RELT
235	TNFRSF11A	CSRNP3	PPP4R4	SNAP25	NRG4	CNN3	RNF24	ADGRF5	FYB1
236	KATNAL1	RPS6KA3	GNG2	PPL	TMEM41A	PTPRK	BASP1	S100A16	WIPF1
237	FAM171B	GNG4	DUSP26	TANC2	RPS6KA2	GSTP1	EVA1B	CLEC2B	RPS27
238	PRLR	PAPSS2	CPD	GPC6	C8orf4	RHPN2	FNDC1	SNRK	GPR34
239	ADAM32	COL9A2	PNMA1	STAT4	CATSPERB	CDH6	ZCCHC24	PMP22	FES
240	RAB3A	SLC35F3	HID1	RBFOX3	OSMR	GPX2	FHL2	USHBP1	RHOH
241	ME1	NPDC1	GPM6A	EHF	QPRT	CAPG	RUNX1	SMAD1	MMP12
242	PIGA	SLC37A4	SCGN	USH1C	DUSP23	MSN	FHL3	SLC44A2	FCGR2B
243	PHACTR1	TMEM9	PRUNE2	BAI3	SNTB1	PLSCR1	RND3	PHLDB1	RPS17
244	KIAA1107	NUCB2	RHOBTB3	SSTR1	CSDA	LAMB2	SLC7A11	SLC12A7	C1orf54
245	ZFP37	ABLIM1	EFHC1	MAF	UGT2B7	ATP11A	FBLN5	RBMS1	NAPSA
246	EIF4A2	PLOD3	TCEAL2	LRP5	P4HB	GJB1	CRTAP	PEA15	ITGA4
247	ATP1B2	IFI27L1	RGS17	LAMA5	EFHD2	REST	TIMP2	PLAT	RGS19
248	DUSP7	SSTR3	RAB3D	RAP1GAP2	PHYHD1	CASP4	MSLN	ENTPD1	SLAMF9
249	PSD3	NEURL1	CAPSL	ARMCX4	CNN2	LAMA3	P4HA3	TGFBR2	NABP1
250	SOGA3	STC2	MTRNR2L8	MGAT4A	TUBB2A	HNMT	PCOLCE2	MLKL	LGALS1
251	KIF5C	PAK3	TBC1D24	INA	CLDN4	GPR110	AFAP1L2	RND1	PILRA
252	HSPA13	CYP4F24P	GAS2	SRCAP	ZC3H12A	LOC100862671	FRMD6	PDE4B	MCM5
253	INSRR	KIF1A	KCNK16	LOC389332	SH2D4A	ANO6	IGFBP7	CTNNB1	CST3
254	SLC2A5	CACNA2D2	C14orf132	PLK2	SRD5A3	ZC3H12A	FGF1	THSD1	PID1
255	FMN2	DAPK2	PREPL	PELI2	ITGA6	TXNIP	PHLDA1	ARHGAP25	RPL32
256	EDN3	NEUROD1	CYB5R1	ZNF503	CXCL12	CHST4	ADAMTS12	RAPGEF1	RPS18
257	KCNJ11	VWA7	TMEM132D	ISL1	TPRN	PIEZO1	OSR1	VWA1	ANXA1
258	PARVB	CTNND2	TCEAL5	S100B	IQGAP2	KCNJ16	ENC1	RASSF2	RASAL3
259	PALM2	IL6R	MBNL2	TAAR5	FLJ44635	CTSS	ZEB1	IL15RA	DUSP2
260	TMIGD3	SPINK4	NEGR1	TNRC6A	PRSS16	ENC1	FLNA	CRIP2	TCIRG1
261	SERINC1	PODXL2	TOM1L2	CELSR3	NEK6	CD9	CEBPB	NOS3	RPS28
262	PEG3	MUC13	REV3L	FAM174B	RPL13AP20	GYPC	MMP19	JAM3	LRRC25
263	CACNA2D1	NOL4	ENTPD3	SLC23A2	PGM1	FAM171A1	RBMS1	ST8SIA4	RCSD1
264	HS6ST1	ATP5EP2	SLC6A17	IL1RAP	LYN	ICAM1	CTSV	KIT	IRF5
265	SLC6A17	BEX1	MGAT4A	DST	ARL14	IFITM3	CCL11	FBLN5	CEBPA
266	LOC643837	GAA	TMOD1	SORL1	CLIC6	CD74	EFEMP2	PSMB9	APOBEC1
267	GPR45	POU6F2	SVIP	SCIN	TMEM2	GMNN	AKR1B1	JAG2	FAU
268	GNG4	GNAI1	PDE2A	PISD	RPL36A-HNRNPH2	CFB	KLF9	SERPINB9	PLTP
269	UBXN10	CNPY2	PBX3	ABCC8	C9orf152	MET	PLOD1	FHOD1	PTPN7
270	CDON	RUNDC3A	PPFIA2	TRO	GALK1	TGFB2	XAF1	ARHGEF10	IL2RG
271	SLC2A12	TUSC3	MBOAT4	ANKS1B	DHRS3	TESC	NQO1	EXOC3L1	CD4
272	FGF14-AS2	FGF12	AKAP11	MADD	C3orf52	ITGB4	CMTM3	HYAL2	ARHGAP9
273	SPCS2	ETFDH	CLASP2	VWDE	SLC12A7	MYL12A	TUBB6	TIMP3	PMP22
274	ABCG1	GLT1D1	TUNAR	MAP6	SEMA3B	ERBB3	KANK2	GIMAP8	UBASH3B
275	ANO5	P4HTM	SLC16A12	WNK2	AQP12A	NCOA7	SCARA3	HEY2	ATP6
276	PRPH	CORO7	NEBL	YPEL2	NFIB	SLC16A7	PCDH18	TGFB1I1	NCKAP1L
277	AMIGO1	CSGALNACT1	FGF12	GLCCI1	MACC1	DHCR24	LDHB	PTPRG	ADAM19
278	C7orf41	KLB	FTO	KANK1	EPHX1	FNDC4	IFITM2	SMAGP	DOK3
279	DNM3	PRKCE	MTRNR2L1	PLXNC1	C6orf132	PRR15L	DACT1	TSPAN14	RPL10
280	SYT4	GPC6	AHI1	TUB	CADPS2	CAPN5	THBS1	BNIP2	LGALS3
281	KCTD8	HSF4	MTRNR2L2	NFASC	RNF213	GCNT3	OLFML2B	IVNS1ABP	FAM49A
282	GALNT14	KCNMA1	ARHGEF3	TDP2	TRAM1	NDUFA4	ANXA1	ATOH8	PLCG2
283	APBA1	FASN	MEIS1	NPDC1	FKBP9L	ZFP36L2	RUNX2	GPR146	LMNB1
284	MT3	WNT4	SETBP1	ZBTB20	SERPINB1	SPINT1	ITPRIP	EFNB2	TK1
285	ACVR1C	DACH1	N4BP2	KCNJ3	AMHR2	SLC28A3	PTGES	PCDH1	DOCK8
286	RUNX1T1	DNHD1	UBE2QL1	KNDC1	XPNPEP1	MYOF	IL33	TSPAN4	ATP5MC2
287	ANGPTL7	ADRBK2	C3orf14	PHYHIPL	MCCC1	FLRT3	RPL21	HOXB5	ATP5F1D
288	MANF	PRDX4	ELMSAN1	ATP6V0E2	AFMID	CDH3	HEPH	HK1	ATP5F1C
289	CDKN2C	PDZD2	EMB	TTN	DAG1	ADAM9	TMEM100	EVA1B	CYTIP
290	JPH1	TSPAN2	FAM49B	EYA4	TMEM52	CA12	OAF	SH2B3	TNFAIP3
291	DNAJC24	C9orf16	TOX	SYNE1	PLIN5	EPHA2	PRR24	JAG1	ZNF385A
292	SLC24A2	PSD	SCN9A	PKD1	TRIM5	C6orf141	TSKU	NES	ARPC1B
293	TUBB2B	SH3KBP1	FAM177B	APMAP	GMDS	SLC17A4	CLIC4	HTRA3	DENND1C
294	NR0B1	MBOAT4	LINC00261	SELM	TPD52L1	CAPN2	NTM	RAPGEF3	PDE4B
295		TMEM45B	KIAA2026	EMC10	CD44	NFKBIA	RPL36A	CHST15	RPS10
296		MIA2	ANKS1B	ABCG1	SLC7A11	APOBEC3C	CYTH3	GNGT2	TRPV2
297		LPL	BEX2	ATP9A	RPL13AP3	GGT6	SPSB1	UACA	NCF1
298		USH1C	USP30	LUC7L3	LYPD6B	TPGS2	HK1	CMTM3	CD48
299		NT5DC3	BTG3	GATS	GALNT3	C3	SMOX	A4GALT	LIMD2
300		BACE1	PPP1R3E	ZBED6	EGLN3	TMBIM1	BNC2	NID1	HK2
301		METRN	CALY	TRIM2	GMNN	DUOX2	SMTN	HES1	CD14
302		MAPK8IP2	SLITRK6	RPARP-AS1	PSMB10	F11R	DLC1	ETS2	DOCK2
303		PREX1	AMPD3	TBC1D24	EIF4EBP1	TNFRSF10B	GPC3	DHRS3	SKAP2
304		PCDHB4	CDO1	SOGA3	SEL1L3	HSD11B2	FMNL3	PRSS23	RAD51AP1
305		IDI1	CYLD	UNC13A	HOMER2	LDHA	KLF2	CRIM1	METRNL
306		ZNF467	RTN4	NDNF	TST	TSPO	ADAMTS5	PLXNA2	KIF23
307		VIL1	NXPE3	ZNF462	HSPB1	DBN1	MMP23B	SMTN	VIM
308		RAB26	ZKSCAN1	MARCH4	PIGR	CLDN3	MSRB3	GJA4	RPL6
309		ZDHHC14	NANOS1	AGPAT2	LGALS3	HN1	C2	FGD5	GPR65
310		HCN3	FAM200B	TMPRSS6	SIGLEC11	C10orf54	LOC100132891	BMPR2	PIP4K2A
311		MMAB	PTPRN	SERGEF	MYH9	ZYX	CNN3	FLI1	ATP5F1B
312		NPNT	TTC8	NEK9	IL22RA1	FGFR3	PHGDH	EFNB1	COX3
313		GLI3	PBXIP1	DNAJC6	TMEM144	OSMR	SEC23A	GATA2	GMIP
314		SIL1	MKL2	INPP4B	TMBIM1	GBP2	ALDH1L2	NETO2	NRM
315		CD320	NRCAM	JPH3	FUT4	BIRC3	LAMB1	UNC5B	TNIP3
316		COX7A1	SV2A	FGB	ITGB4	TES	LIF	FSTL1	F13A1
317		COL27A1	CCNG2	GRIA2	BCL3	CDR2L	S100A1	PLSCR2	CLEC4C
318		APBB1	EMP2	BANK1	GJB2	ABHD4	LSP1	TLR4	RPL35
319		PRKAG2-AS1	GCLC	TRAF3	MOB3B	CYP3A5	PTGIR	PPP1R18	PFN1
320		OGFOD3	CDCP1	NBEAL2	CLMN	CDX2	SLC2A3	ADGRL4	ATP5PD
321		UNC13A	C5orf49	SLC8A3	MEST	NCF2	TGFB1	N4BP3	SYK
322		FAM110B	ABHD16A	ZNF365	OVOL1	RBP1	NES	CYSLTR1	SP110
323		DPP7	ZDBF2	TBL1X	RSU1	BAAT	LZTS1	LHFP	RPS27A
324		IRX1	TCEAL6	SMAD9	SH3PXD2B	HLA-DRB1	ADAM19	DENND3	RPS15A
325		QSOX2	FZD3	TOX3	ELF3	AMOTL2	AHNAK	PTPRR	C16orf54
326		RNASE4	IGFBPL1	CNNM3	ERBB3	THSD4	CHSY1	PTGS1	CENPA
327		SLC35F4	ZNF33A	ABCA5	EPN3	IFIT3	WFDC1	MFGE8	WDR89
328		SCN3B	BEX5	ATCAY	COCH	CD58	GYPC	ADAM15	COX2
329		SCARB1	POU3F1	RUFY3	NEXN	NOTCH2NL	HOXB2	HOMER3	RPL9
330		ZSCAN16-AS1	ZXDC	LDLRAP1	SYTL2	C1orf198	CREB3L1	PPM1F	RPL23A
331		GOLT1A	CDK5R2	SZT2	RNF186	ATP8B1	TPM4	MOSPD1	DOCK10
332		ABHD14A	ANKRD36BP2	PITPNC1	TRAF5	SH3BP4	GAS6	CD300LG	BOLA2
333		CPQ	RABGAP1L	CDKN1A	CYP1A1	KLF6	CFH	YES1	RPS3A
334		LHPP	SMPD3	NEUROD1	CCNO	PDLIM1	RPS26	LATS2	IL10RA
335		TSPAN33	BTBD3	ZNF204P	TMSB4X	DSG2	PRR16	GPIHBP1	FCGR1A
336		GSTA4	SLIT1	MIS18BP1	B4GALT1	BCL10	SCARF2	IL4R	PTPRE
337		GNAZ	ESR1	ATP1B2	NQO1	TMSB10	TF	LAYN	ACTB
338		MAOB	ZNF540	NPHP4	LRRC59	NTN4	PSAT1	MYLK	UBE2S
339		ASPHD1	TMEM196	IDS	C1R	ACSS1	AKAP12	CRACR2B	RPL7
340		IFIH1	ABCA5	CRMP1	KIAA0922	UGCG	NNMT	LHFPL2	MARCH1
341		CECR1	LRRC2	GPLD1	RAB11FIP4	MBOAT1	OLFML2A	GIMAP1	HAVCR2
342		NISCH	TMX4	NACAD	HDHD3	C1S	RPL18A	JAM2	RACGAP1
343		CACNA1A	PFN2	KLF12	TRIM47	RGS3	NRP1	SYNM	RPL10A
344		ST8SIA3	HCFC2	GPR98	RHOD	ERICH5	PTPRE	SH3BP5	FLI1
345		MBOAT2	CCDC104	KCTD6	KRT7	CES1	FSCN1	EHD2	PRKCD
346		C12orf75	DPP10	FZD3	CASP4	AKR1C1	ECM2	FBLN2	ATP5PB
347		MAGED1	BCL2L13	CBFB	ADAMTS1	TRIM22	FOXS1	ORAI1	LGALS9
348		CST3	ERCC-00074	NLGN1	PYCR1	PLLP	LOXL3	SHE	COX1
349		COX17	TBCC	NAGS	HUNK	KCNQ1	HEG1	MEOX1	YBX1
350		CITED2	GRASP	STX1A	SLC6A8	PAQR5	CSGALNACT2	FOXF1	FOLR2
351		STX16	PRKCD	ANK3	RDH10	SLC2A1	DSE	RSU1	SLAMF8
352		C21orf58	FAM179B	FGF14	CAMK1D	PON2	MUSTN1	TMEM47	RPS19
353		UQCC2	PPL	TBCC	REG1P	YBX3	LAYN	IER2	FAM111A
354		MIR7-3HG	SLC44A5	PWARSN	SMPDL3B	HSD3B7	PLA2G4A	ITGA6	CYSLTR1
355		MZT2A	ITPR3	MLIP	ADM2	MAL2	TRAM2	RHOC	FAM49B
356		GPAA1	PDX1	SFI1	KIF1C	LYPD1	NR2F2	NR4A1	ADGRE5
357		CBX6	ETV1	LRP6	CFI	HS3ST1	KDELR3	RPL18A	TCF19
358		DNM1	ME3	APOL2	PACS1	PLAU	NFATC4	DLL1	GMPR
359		TUBA4A	C5orf42	SERPINA1	RHOC	RIPK2	EPS8	HSPA12B	PRKCB
360		RABAC1	IL20RA	MLPH	TUBA1C	EPHB6	ITPRIPL2	SOCS2	ACSL5
361		PCBD1	EFNB3	FAIM2	ENAH	TNS1	OLFML1	C3orf70	ZFP36
362		ISL1	TENM2	SPIRE1	ABCC3	PERP	GPR124	F2R	PSMB9
363		LPPR2	FOXO1	KMT2D	KLF6	PLAUR	SSC5D	ID1	TAGAP
364		RTN1	LAMA1	STEAP2	SORD	AGR3	ATF5	STARD8	FMNL1
365		GGA2	DAPL1	RAPH1	ZNF704	TNIP1	KIRREL	NPR1	LITAF
366		TCN2	BUB3	MAST3	IDH2	IQGAP2	EPHA3	GPX8	MAOB
367		KL	VWDE	CHN1	FA2H	MPZL2	FAM114A1	PTMA	KCNAB2
368		NFASC	HDGFRP3	PDE4DIP	SLC44A4	ETS2	HIC1	ARAP3	ND4
369		MZT2B	ATP2A3	OSBPL8	SAV1	EFNA1	SUSD2	PLOD1	RPL14
370		CELSR3	ROR2	CACNA2D2	GPRC5B	PRDX1	MEF2C	FCHO2	NFKBIA
371		PELI3	SNX18	CDCP1	CXCL1	AHNAK	LOXL1	GIMAP7	RPL24
372		VKORC1	SYT17	TACC2	ADAM9	ZAK	TBX2	MPRIP	ATP5F1E
373		MARCH8	MREG	HDAC5	TNFAIP8	DDIT4	TMEM45A	MYL12A	ARHGAP31
374		ZFR2	ZNF204P	FNDC3B	IL15RA	TPM4	SH2B3	CNN3	PIK3CD
375		MAP3K15	USP13	SCN2A	CCDC68	SOD2	RARB	TGFB1	NRROS
376		GNG2	STAU2	ZNF608	PABPC3	ADAMTS1	RPL39	GBP4	SOCS3
377		NDUFA7	SIPA1L1	BCL9	TGIF1	TAGLN2	TMEM47	FAM110D	ATP5F1A
378		KCNC1	GYG2	BCAS4	ANKRD22	ONECUT1	GPR176	YBX3	SLC44A1
379		SV2A	GCK	FURIN	SNHG5	NINJ1	PIP4K2A	COL15A1	CYTB
380		ZCCHC18	CDC5L	SEC24D	PIK3AP1	PDLIM7	FAP	SNAP23	RPL28
381		PPP1R3E	C2CD5	A1BG	FGF13	APOE	PPFIBP1	QKI	ATP5MF
382		BCAT2	MEGF9	AMER3	NPHS1	ITIH5	PPP1R18	APLNR	IKZF1
383		SIPA1L3	GPR68	APOH	HLA-DRB1	RHOD	FERMT2	LIFR	ETV3
384		NPY	KIAA1244	TMOD2	DLG3	LIF	ASPN	VIM	ATP5IF1
385		RIIAD1	LEO1	ASTN1	PQLC3	C1QTNF5+MFRP	SFRP4	PREX2	TNFAIP8
386		SNED1	JAM3	RAPGEF4	FAM109A	TMPRSS3	CNN2	ST3GAL6	ICOSLG
387		SLC38A10	RUFY3	DDX17	DAB2IP	TMEM51	VASN	CPNE2	MAN2B1
388		HIST2H2BE	MAST4	CASD1	GSTP1	LOC100422737	FOXF2	PREX1	ATP5MG
389		SRBD1	ARNT2	SMPD1	HLA-F	CCL28	TNS1	IER5	SLC8B1
390		TUBA1B	HPN	RAB33B	PVRL4	AKR1C3	FBLN2	ZFP36L2	BATF
391		VSNL1	CASD1	QPCT	PTGFRN	CLDN7	ZNF469	CA4	SEMA4A
392		SESN3	ZNF652	SPPL2B	MGAT5	PRSS22	GPC1	ISG15	CARD19
393		SLC25A53	FAM171B	STIM2	SLC35D2	TMPRSS2	RSU1	RASA3	ARHGAP19
394		PDXP	NAP1L5	PER3	MYZAP	POF1B	SGCD	TBXA2R	RASGRP4
395		SLC5A1	FNDC3A	C1QTNF4	FGFRL1	TPBG	RPS27	NRARP	CSK
396		GFOD2	CYP2U1	SLC40A1	CCDC64B	ITGB1	CYTB	PLCB1	ORAI1
397		ARHGAP1	INA	ZDHHC8P1	PAQR7	FRAS1	RAI14	SYNPO	MTPN
398		NDUFA13	C10orf32	ACSL6	CDC42EP1	ITGA3	FAM126A	TSC22D1	FGR
399		SEPT6	FBXL16	NSUN6	CD97	GULP1	KLF4	ZNF521	C19orf38
400		AP3B2	TTC37	RFX1	RPL10L	ANXA2P1	ACKR3	RARG	RPS6KA1
401		HTR1F	PER2	KLHL42	TEAD2	TMEM139	SBSN	C8orf4	CAMK1
402		NME3	TSPYL4	SLC22A15	HEYL	FUT6	ARHGEF2	ITPRIPL2	PPIA
403		ATP2B1	CLTC	ZBTB4	EHD4	HES4	MYC	PPFIBP1	CLEC10A
404		GNAS	APOBEC2	GPR56	LOC283070	LRRC75B	HCLS1	TAP2	LY96
405		MALAT1	EFR3A	RGL3	PTPRH	DUSP1	RPS17	HLA-E	RPS15
406		CDC42EP3	ARHGAP44	PLXNA3	RPS12	BAIAP2L1	ATP6	ATP1B3	APBB1IP
407		BSN	ERCC-00004	PLEKHA6	PARD6B	C1R	NOTCH1	HOXB6	HVCN1
408		SCD	USP11	SLC29A1	ARHGDIG	TNFRSF11B	ELN	ATP5PF	ST8SIA4
409		SCGB2A1	ELAVL4	PLD3	TNFRSF10B	IL4R	COPZ2	NTAN1	MEF2C
410		DZIP3	GRM1	CDC42BPA	TM7SF2	DAB2IP	LINC00152	NID2	CX3CR1
411		HOPX	AKT3	PTMS	MBOAT1	ADCY5	TREM2	TRIOBP	RPS16
412		MYO16	STEAP3	NEBL	RPSAP58	FGFR2	ADAM12	SOX17	ATP5PF
413		SOCS1	GLCCI1	PTPRN2	SLC38A3	ERGIC1	LEF1	RGL1	CRLF2
414		LINC01420	CMPK2	SLC25A27	SH3BP2	SVIL	S100A16	CRIP1	WDFY4
415		TBL1X	PTCHD2	NCOA1	MSC	SH2D3A	F2RL2	PROS1	ITGAX
416		PRUNE	APBA1	KMT2A	PMAIP1	PLD1	RGS10	EPHB4	RILPL2
417		TMEM56	RAB36	ST18	NEAT1	TNFAIP3	SKAP2	UNC45B	VASP
418		CUTA	FKBP5	C20orf27	C4BPA	DUSP4	PDLIM7	EMP2	TRAF3IP3
419		NAT16	ZSWIM5	CXorf57	ZNF117	NCK2	CHST15	NOSTRIN	OGFRL1
420		CPLX1	COQ10A	FOXP4	SLC38A1	RHOB	UBASH3B	RRAS	APOBR
421		FBLN7	GOLGA4	TCEAL2	TNFAIP1	MUC6	SPARCL1	INPP5D	POU2F2
422		HNF1A-AS1	ERCC-00130	PNMA2	ST6GALNAC4	CPM	PRKG1	APBB2	WAS
423		FOXJ1	ZNF667-AS1	STON2	SLC16A7	PAH	FKBP7	PIM3	RPS8
424		TIMM17B	NKX6-3	SYT11	GSDMB	ALDH1B1	RPL17	SASH1	LTB4R
425		FADS2	LYSMD2	BLCAP	MPST	UBD	PID1	CDC42EP1	ADCY7
426		SCGN	PEG10	RABGAP1L	EHD2	VAV3	CRYAB	SIPA1	ADA
427		RGS7	RTN1	RALGPS1	TMEM98	MYL12B	ID3	RFTN1	MIF
428		SUMF2	PRKCA	SLC4A10	ARNTL2	DSC2	GLI2	RBMS2	ADGRE1
429		HLA-E	PRMT6	IFIT1	IDH1	RND1	S1PR2	KLF13	CKAP2L
430		WIPF3	ZZZ3	LINC01128	ARSE	B3GNT3	KCNG1	SAMD9L	RPL13
431		HIST3H2BA	TMOD2	AMPD2	HN1	TP53I3	ZNF385A	POMP	TLR4
432		MBOAT7	RFX6	ZSWIM5	KCNK15	EGFR	RASA3	ADCY4	ITGAM
433		NRXN1	MPP6	CLASP2	PPIC	VASN	OLFML3	PLEKHO2	HJURP
434		GDA	VOPP1	ARHGAP35	KITLG	MYH9	LIMS1	HOXB7	RPLP0
435		IFI27L2	C1QL1	SCG3	VIM	LY6E	CD302	RIT1	ATP5PO
436		BVES	MCTP2	TET2	MYO5C	EEPD1	TNXB	SPRED1	RPL13A
437		LOC389332	GPRASP1	SYNE2	TMED6	NAMPT	DAB2	AHNAK	DAB2
438		PLA2G4C	DNAI1	ANKH	LIMK2	SORBS2	NRP2	NMI	RPS23
439		C3orf14	MAB21L3	USP20	GAMT	ANXA2P3	SLFN5	PLS3	CLEC12A
440		CLIP3	RAD21	MAP7D2	SMAGP	TFPI	S100A13	TNFAIP1	PTPRO
441		KCTD13	USP2	RERE	PPP1R3C	SEPT9	FEZ1	ANKRD50	EHBP1L1
442		TCEAL2	MYLIP	PHLPP2	B3GNT3	EXT1	PLEKHO1	NEDD4	SNX20
443		SLC8A2	PPP2R5A	SEPW1	RAB27B	GRB7	TMEM98	C18orf54	ATP5ME
444		TMEM141	PPP1R14C	PRG4	ETS2	OCLN	PHLDA3	SEMA3G	RPS11
445		CCDC108	BLCAP	HNF4A	ADD3	PARD6B	ZFP36L1	ADARB1	TMEM106A
446		FABP5	MCOLN3	PCDH17	FBXO2	DDAH2	ADGRD1	CCRL2	ATP5MC1
447		GLB1	RABGGTB	MAN2A2	CYP4F11	SLC6A20	P4HA1	NFATC1	MATK
448		LSAMP	SRGAP3	PLD1	ATP11C	TJP3	MEDAG	YBX1	RPS24
449		NMNAT3	PROS1	KIAA2018	PSTPIP2	TUBA1C	TPBG	ITGB3	ARSB
450		CORO2B	ARMC2	MED12	C5	ATF3	LARP6	MGAT1	SLC9A9
451		ABHD14B	ENO2	TENM3	ADCK3	MID1	EDNRB	P2RY2	RNASE6
452		SNX29	LPIN1	FOCAD	THEMIS2	HOMER2	HK2	SLC31A2	RPL23
453		DNAJA4	RCOR3	SMG7	ALDH2	HHEX	MYOF	OSTF1	SMIM30
454		ATP6AP2	FAM47E	PPARA	RHOV	MYO1E	COX1	GIMAP5	CD302
455		C2orf54	SCRN1	RHOBTB3	HK2	CDH1	MSN	LCP2	KLF4
456		CAMK2B	FBXW7	LOC642366	P2RX1	EPHB2	ZYX	KCTD10	GRAP
457		ATP6V0B	AP3B2	LGI2	AMIGO2	HSPG2	PLEKHF1	TINAGL1	C3AR1
458		PHPT1	SIM1	ABCB4	SLFN5	GATM	HIST1H2BI	LTBP4	RASSF6
459		JSRP1	ZMAT1	KDM7A	ALS2CL	INSIG2	SOCS2	FEZ2	HCST
460		CCND3	ST8SIA3	OLFM2	ARRDC3	RAB32	C3orf80	FILIP1	IL7R
461		FAR2P2	LOC283177	KIAA0226	PLLP	SH2D4A	EMILIN2	SERTAD1	ARL11
462		CDK5R2	FOXJ3	EPT1	TMEM51	MICA	LPL	ELN	LRRK1
463		CREB3L2	LOC100506844	ZZEF1	SLC39A14	IL1RN	PCSK6	HLA-DPA1	GLMP
464		FAM131C	RYR2	HNRNPH1	KLF5	TUBB6	COX3	ABHD17A	ACER3
465		SORBS1	FANCL	CUX1	BCL6	ITGB8	WIPF1	TCF15	VAV1
466		EVA1A	TMEM5	FLJ31306	EPHB4	PCSK5	FKBP9	PLTP	UBALD2
467		SYP	KLHL32	NYNRIN	SPECC1	ST14	SLC17A9	CHSY1	RPS5
468		C1orf21	MPP1	UNC79	MGLL	NRP1	CERCAM	BCL10	REL
469		USP25	TTC3	KLHDC8A	CXADR	SLFN5	RPL10	UBALD2	EIF3C
470		RGS9	GABRA1	TUBB2B	SLC41A2	YWHAZ	ND4	LUZP1	CXCL10
471		NR4A1	PJA2	CPE	NCOA7	TMEM2	LHFPL6	NFKBIA	ZYX
472		RAMP2	KCNB2	ATRX	C1orf115	KIAA1217	ABCA1	SLC2A3	PIK3CG
473		KCNQ1OT1	RAB39B	SMAD5	TEAD4	IGFBP3	STK17B	HBEGF	RPS2
474		MICAL1	MTIF3	KMT2C	SLC1A5	FSTL1	TTYH2	HIP1	HAUS8
475		TMEM236	ETNK1	ZKSCAN8	PIWIL4	ANXA11	LPAR1	SNAI2	BMP2K
476		WDR59	KLHDC9	MIR7-3HG	ITGA2	TMSB4X	RPS7	WIPF1	CLEC4E
477		UNC79	CC2D2A	ZNF776	TP53I3	IGFBP7	TCEAL7	ADAMTS9	RPS14
478		GNAO1	RCAN3	RIC3	ALOX5	SLC9A3R1	NEDD4	RAPGEF2	NFAM1
479		MAPK10	LRRC49	FAM117A	RIPK3	SYPL1	TGFBR2	HECW2	SH3BGRL3
480		CHPF	TERF2IP	PRKD3	LIFR	SPTSSA	EFHD1	MCF2L	ANKRD44
481		GPRASP1	LINC00948	DISP2	PRR15L	RERG	PODN	FRMD4B	RPL26
482		PAX6	ATP10D	CTDSPL	NRARP	PCDP1	MRAS	VAT1	RPL35A
483		ROBO2	SLC23A2	NBEA	ACOX1	PTTG1IP	TFPI	FERMT2	CD163
484		SLC36A4	ENOSF1	GIPR	LOC100129034	B4GALT5	RHOJ	DUSP7	SH3BP1
485		TIAM1	UNC13B	CPNE8	GCAT	LAMC1	ATP1B3	GALNT18	IRAK3
486		P4HA2	WDR17	LDLRAD4	IFNGR1	FBLIM1	DNM3OS	ZNF792	CXCL16
487		CALM3	UGT8	AKAP11	FOXC1	SULT1C2	TMEM158	ADAMTS1	B4GALNT1
488		TRIM59	ANO5	TP53INP1	TMEM92	RND3	WT1	GPX1	BORCS8
489		LINC00116	HSPA13	ETNK1	SLC39A8	C1orf106	SEPT4	SMAD7	MT1A
490		GPR137B	ATP6V1A	HNF1A-AS1	PIEZO2	IQCK	CTGF	PXN	FOSB
491		ROMO1	WDR7	RGAG4	WDFY2	CFH	AR	RILPL2	BORCS6
492		HSD11B1L	SYT11	EIF4G3	ASAP3	APOC1	CLEC11A	HDAC7	RPL41
493		KCNK3	TMEM61	CORO2A	CGNL1	MARCH3	CPXM1	RDX	SVBP
494		LRRC4	KLHL2	FOXO1	REST	MVP	SH3PXD2B	MEF2A	MCEMP1
495		EPG5	PHKA1	TSPAN7	KCNK6	MPST	ND1	PPP1R16B	KLHL6
496		STK32A	IRGQ	ACTL6B	CTSS	PVRL2	IFI27	KLHL5	SNX5
497		GPD1	LOC100128288	ENAM	C17orf76-AS1	ACAA2	SLFN11	PPIA	HLX
498		LDLRAP1	CDC42SE2	HIST2H2BE	ERCC-00002	BLNK	RPL7	KIAA0355	MAP4K1
499		PDZK1	NAPB	ZBED5-AS1	MYO5B	CLDN23	RRAS	TRAM2	CD180
500		FAM135B	DLG2	SEC11C	LGALS9	VGLL4	RAB23	UTRN	LUC7L2
501		LCLAT1	CCNY	TTLL7	ESRP2	TST	SPRY2	CDC37	SKA1
502		ATRAID	ELOVL4	HS6ST3	H6PD	CD151	LITAF	TANC1	MERTK
503		SIDT2	KIF9	BTG3	GALM	CYS1	LMO4	FRMD4A	RPS25
504		IDNK	CACNA1A	FBXL16	ZNF710	ACTB	KITLG	BGN	TNFRSF13B
505		LINC01370	C7orf41	LRCH3	PPIF	CYP1B1	RBMS3	AFAP1	PLBD1
506		PTPLA	RET	ZCCHC11	SRC	NFIA	LAMA1	LRRK1	SP140
507		CCDC153	SLC25A53	PNISR	HLA-DRA	NCMAP	PLXND1	ATOX1	TNFSF9
508		PFN2	GHR	NCALD	HIST1H2BK	IL18	TSPAN9	MYRIP	H2AFZ
509		TMEM179	TAF9B	DPP6	PRPS2	MUC1	TCF21	LMO2	RPL37
510		BEX5	G3BP2	PCNX	ARHGDIB	PLS3	MIR143HG	TSPAN18	ARHGAP15
511		TENM4	EGR4	HMGCLL1	AHCY	ERRFI1	HOXA5	SOX7	CASP8
512		C6orf1	PPP3CB	THUMPD3-AS1	ZNF217	NEK6	TGM2	ARHGEF6	GLTP
513		YIF1A	KBTBD6	VAMP2	PXDC1	TGM2	CELF2	ACKR1	GIMAP1
514		NMB	TMEM99	PARM1	TRIM45	HSPB1	RPL23A	TMSB10	CENPL
515		MFSD3	UBP1	DLG2	FKBP11	BDH2	SHC1	PROCR	S100A1
516		WNK3	NEUROD1	OTUD6B-AS1	RCC1	RHBDF1	PLSCR4	MPZL1	VAMP8
517		ST18	GTF2A1	GLRB	MLPH	JAG1	SGIP1	LOC100505495	ATP5MC3
518		SH3GL2	TTC18	SGIP1	ITGB6	SLC22A18	FAS	RPS27	ATF3
519		LGALSL	AP3B1	HEPACAM2	LYPD1	C14orf105	FBXO32	TAX1BP3	GIMAP6
520		A1BG	ZFHX3	KCNT2	EGFR	RCN2	RPS3A	ATP6	MRC1
521		CLIP4	TMEM181	RAD21	RASSF3	IFNGR2	SPRY4	FES	MICOS13
522		CRMP1	PIKFYVE	MAP1A	FBXO25	CORO1C	C1QTNF6	AOPEP	EZH2
523		NRSN2	RAB12	ARID1A	DUSP16	MYO5B	DCBLD2	SRPX	CD33
524		OGT	RCHY1	RPS6KA6	PGM3	VSIG10	RPS18	GNAI2	RPS4X
525		G6PC3	KLHL8	MTERFD2	RPL19P12	HLA-DRB5	DUSP14	SEPT4	DOCK11
526		CRELD2	VWA5A	FRY	C2CD2	ARL6IP1	AMOTL1	RIN3	NCOA4
527		SLC29A1	MAP2	PDE9A	CBLC	TMEM123	FAM198B	LUC7L2	EIF3F
528		ZBTB41	DNAJB9	LPPR2	ZNF503	PPP2R3A	ZAK	PRKD2	MSN
529		BEX2	ZNF483	NIPBL	NAMPT	MGAT4B	IKBIP	HOXB2	PROM1
530		TUBG2	ACSL6	NAT8L	CD2AP	KIAA0247	SLC2A10	THRSP	LFNG
531		H1FX	HMGN2	SNED1	ANO6	C15orf52	ZNF423	GSTM5	CEBPE
532		CES4A	CBX7	DCX	CAPN5	ADRA2A	RPL22L1	MAPK3	TNFAIP2
533		TEX30	CLCN5	PURA	SPAG4	TMEM27	TXNDC5	ATP5F1B	RAB3IL1
534		VAMP2	LRRC36	PDXP	PCED1B	LAPTM4B	RPSA	ARHGAP23	TLR2
535		TRAPPC9	NECAP1	ACHE	PABPC4	CTTNBP2NL	LY96	AHR	MICOS10
536		UQCR11	KIAA1109	TSC2	GRHL2	RETSAT	REST	G3BP1	ACTR3
537		SGSM1	PON1	PLEKHM2	RIPK2	FGFR4	LAMB2	RPS7	ARL5C
538		TMED4	ARL4D	MBP	ARHGAP26	SLC44A3	HMCN1	PKIG	ACVRL1
539		CD46	PUM2	ATN1	RNF181	UPK1B	CBLB	H3F3A	CMTM7
540		ANKH	LRRN2	LINC00938	MESDC1	ENAH	C3orf70	GRASP	RANBP1
541		SCG3	ZNF518A	FLJ37453	PIP5K1B	S100A13	NT5E	UQCC3	ZNF705A
542		CAMK2N1	ARVCF	SNPH	DDIT4	QSOX1	LAMC1	PTPRM	CASP1
543		TMEM260	MAPK10	PLCXD3	LACTB2	ITGA6	CKAP4	FKBP10	DDX39B
544		MVK	CXXC4	DMTN	FOSL2	WDR1	PARVA	CHST11	ND2
545		KLHL42	HLF	PPP1R21	TMEM87B	MAP3K1	SASH1	RASA4	RPS13
546		PPP6R2	LDOC1L	IP6K2	GCKR	VCL	CADM3	DAB2IP	ENTPD1
547		LMO1	DNALI1	UBE2Q1	TNIP1	MYRF	DFNA5	PTP4A3	PSMB8
548		RAB27A	KDM4C	RUNDC3A	GGT1	PALM3	FOXF1	STARD4	HFE
549		LSS	TTC3P1	KIF3A	PODXL	MYO1C	CD7	GBP7	SPC24
550		FAM183A	JAKMIP3	ARHGAP32	FLJ44511	ST6GAL1	NQO2	TMSB4X	NPEPL1
551		GDI1	SPTBN4	SESTD1	TBC1D1	HLA-DPB1	RPS8	TP53	NFKBID
552		C14orf1	SPATA6L	HERC1	TGFBR1	PPP1R13L	NKD1	TM6SF1	POLE4
553		TPCN1	PJA1	PCM1	CHPT1	EFEMP1	ENPEP	FAR2	CSF3R
554		DOPEY2	TIGD7	LRP5L	GPR155	DUOXA2	LY6E	RPL21	RPLP2
555		TMEM60	ARG1	BEND7	HEBP1	SERPINB8	HOMER3	TM4SF1	IFI16
556		ATP6AP1	RGS6	KL	HNF4G	APLP2	GPSM3	TMEM140	CXCL14
557		SMAP2	CECR1	PREPL	AMY1C	FHL2	SYDE1	PLEKHG2	PARVG
558		CCDC64	PARP8	TERF2IP	PRSS12	SPATS2L	LRRN4CL	WSCD1	RPL27A
559		HECTD4	RBM26	C2orf74	LOC441454	SFXN3	ARHGEF17	JAK3	RNASE2
560		LAT2	KIAA1467	CAMK2B	SHROOM3	ENO1	FGF2	EOGT	PREX1
561		UCP2	IRS2	TNRC6C	TNFAIP3	SDCBP	DCLK1	NUAK1	CD69
562		CPNE3	GRAMD1C	GRAMD1A	TNFRSF12A	ASAP2	NFIX	ABLIM3	GNAI2
563		PCK2	JPH3	MEAF6	RAB11B-AS1	TTYH3	RPL10A	CARD19	HACD4
564		SYDE2	TXNDC16	MXD4	FNDC4	TYMP	PEAK1	PPP1R15A	RPS20
565		ACVR1C	RALYL	FBXW4	POLE4	PLCD1	PRDM1	MOB4	SHTN1
566		IL10RA	ADAM8	FBXO44	LNX2	PIK3IP1	CHST2	C16orf89	DPEP2
567		HERC5	SHPRH	PGR	LPAR2	HK1	RPS15A	ACOT9	SIPA1
568		FAM96B	MAGEL2	FAM120B	MGC72080	RNF19A	C1orf216	EPB41L2	MILR1
569		PMM1	DLG1	ZNF652	NDRG1	TSPAN14	ARHGAP22	MECOM	PTMA
570		FAM213A	DENND4A	SH3BGRL2	LAMB2	ODC1	FADS3	EMP3	TMSB10
571		PRAF2	ABLIM2	SLC9A3R2	HPN	GLIS3	RPL13	STARD9	SUSD3
572		SMPD1	PAN2	PKIA	TMEM123	ADH1C	FOSL1	PFN1	RPL22
573		PAK6	UGDH-AS1	SMARCD3	GUSBP11	VANGL1	MYO1E	PROSER2	SIGLEC12
574		ZNRF1	PKD1P1	PTPRN	GRB10	CLINT1	ABI3BP	MOB2	RPL34
575		KLHL3	KIDINS220	SLC2A13	CCNC	LSR	ACP5	SNTB2	ADPRH
576		RAB3GAP2	TMEM66	JAKMIP2	PLEK2	ATP10B	MCM6	MSX1	TMEM212
577		SESN2	HEY1	OSBPL10	PARVA	CD59	RPS19	TBX3	GNA15
578		NDUFA3	DNAJC10	ACACB	FBLIM1	SHANK2	RPL9	BCL2	TONSL
579		MARCH4	NSF	MIER3	RPLP0P2	ABHD11	RPL35	CD81	TMEM160
580		INA	SALL2	ARL15	CYP27B1	EHD4	IFIT3	PITPNC1	DOK1
581		FADS1	ERCC-00046	SLC7A14	RPL13AP6	TNFRSF10A	RFTN1	EML1	PPM1M
582		CEACAM1	LOC100507577	CD200	PTPRK	CAPN1	METRNL	ANKRD33B	RPL12
583		TRMT112	DTX3	BBX	CXCL16	TMEM98	GPM6B	CPNE8	FAM234A
584		OBSL1	PCF11	GDI1	ZNF114	NFKBIE	KDELC2	PIEZO1	PTPRCAP
585		TMX4	POLR2K	TMEM5	CASP7	PLEK2	KCTD10	LBR	CLEC6A
586		TMEM61	ABCC8	MTSS1	EPPK1	GPC1	LIPG	MYO1E	SGK3
587		FAM83B	EFHC2	FAM169A	DEF6	MCL1	TSHZ3	LYN	SLC29A3
588		FEZ1	KIAA1958	URGCP	LHFPL2	B4GALT1	RCN1	SRPX2	LRRC8C
589		EPHX2	FLRT1	BPTF	FARP1	SIRPA	RPL28	TRIM47	RENBP
590		MAP7D2	PKD2	NCOA6	ALDH3A2	PXDC1	P3H4	TMEM234	GINS2
591		RBCK1	FBXO27	TEKT4P2	SMAD3	PIM1	RPS10	TMEM189	CLEC5A
592		NOVA1	HDHD2	MAST4	ENC1	HLA-DMA	SCARA5	FKBP7	TIFAB
593		ARL2	TPR	DYNC2H1	ATP13A2	STAP2	SVIL	HIC1	KIF21B
594		PRDX2	ZNF25	CHGB	ONECUT1	NUAK2	SLC12A4	ECE1	TSPAN32
595		COA3	APOO	BRWD1	EDN1	TRIM5	EFS	CSF2RB	HYPK
596		GSTO2	KSR2	SV2A	GALNT6	RAB9A	PDLIM2	SMURF2	NRDC
597		FAM46A	ATP6V1B2	SYT17	KCNJ5	ACSS2	RPL6	SOX4	CMKLR1
598		CDH10	LONRF2	TMEM245	ARHGAP10	KRTCAP3	PPIC	PALMD	XIST
599		PRR26	FAM81B	USP2	MKNK1	MAT2B	TRPS1	ARHGAP27	LMO2
600		CBFA2T2	DENND5B	C14orf105	DIAPH1	DAZAP2	ATP5PO	GJA1	RPS12
601		TCTA	STXBP5	PPP3CA	EIF2AK3	SHISA2	BCAT1	RCSD1	NLRP3
602		PAM	ZNF292	TENM2	ICK	RALB	KCTD15	GLMP	RAP1B
603		PLA2G16	HPRT1	YLPM1	ORAI1	DOK4	EPDR1	TCF7L1	POLD4
604		CHRNB2	NIPSNAP1	UBR4	RAB3D	VPS37B	SFRP1	CD1D	EEF1A1
605		ACACA	TCEAL3	PKIB	SLC20A2	FMNL2	RPL24	RPL36A	FDX2
606		CHST9	HNRNPA1	SSX2IP	CASK	SRGAP1	RPS15	ARPC1B	MAP11
607		ZKSCAN1	LYRM5	WDR60	UST	CNDP2	SPRED1	BTNL9	CCR5
608		RHBDD2	ZNF331	DENND5B	CTH	WLS	RPS9	ADGRG1	TMEM119
609		STMN3	MYH10	TBC1D8	FAT1	TMEM140	ATP5F1D	ARHGEF2	VRK1
610		MVD	ZNF664	TNRC6B	CASP6	TMEM37	B4GALT1	GRK5	RPL4
611		RIMS2	RSPH1	LRRC2	BTN3A2	EHF	COX2	TTYH3	SNRPG
612		SSTR1	TMEM150C	RSBN1	RBPMS	IGSF3	RPL14	TSPAN9	ARL4C
613		TRAK1	ASB9	CACNA1A	RARRES3	ANXA5	SRM	NOVA2	ABHD17A
614		CKB	SCN1B	CLIP3	HGD	GALNT3	ANO6	TMEM50A	RASA3
615		PYCR1	RFX2	LINC01004	HAUS4	SP100	ETS1	RASSF3	IL21R
616		UBE2QL1	ATRX	MAP9	CPVL	HEBP1	RPS29	CYTH3	JUND
617		WBSCR22	NIN	SMAP2	SELM	SWAP70	TMSB10	RAP1B	FTH1
618		REEP2	ZNF37A	PACSIN1	DERL3	SLC25A37	TWSG1	CLIC1	PTPN22
619		SNCA	LPPR2	NAP1L2	B3GALNT2	LOC93432	PLEKHG2	ARRB1	GUCA1A
620		NDRG1	GAP43	MCM3AP	HES1	SFT2D1	RPS28	FAS	ADAM8
621		C18orf42	DACH1	MAN1C1	STS	PDGFC	HAS2	PLCG1
622		ATP9A	CHD7	FAM46A	PPAP2A	ITGA5	MYADM	SH3GLB1
623		ARNT2	EPM2AIP1	EPS8L2	TRAF4	SLC35F2	RPLP0	SHROOM4
624		NDUFB8	BAIAP2	JAM3	RPS28	TCN1	LRRC59	TNS1
625		GRIA2	CYB5R4	NKTR	RTN4R	CMPK1	LATS2	ABCG1
626		B3GNT1	MAGEH1	FAM167A	RETSAT	TTYH1	TCF4	RPS17
627		SLC25A1	CALCOCO2	GALNT12	PELI1	CD47	C1orf54	HVCN1
628		ANXA6	SCML2	AHI1	TSPAN15	ATP13A4	ATP5PF	SVBP
629		MAGI2-AS3	NDNL2	DNAJA4	FPGS	ABHD3	NAB2	MGP
630		CD63	ERCC-00002	ORAI2	NNMT	FAM150B	PTGFRN	HMGB1
631		FAM63A	MTUS1	TSHZ1	BMF	BCL3	TMSB4X	MSRB3
632		PAFAH1B3	MLF1	GOLGA2	USP53	ACSF2	RPS16	MERTK
633		RNF150	ARHGEF9	RCOR3	FZD5	FUT4	HOXB6	CYP1A1
634		PDLIM2	TMEM132C	PIANP	NPAS2	BHLHE40	PTGS2	FAT4
635		SLC12A8	MDK	ATM	CHAC1	STK38	RPLP1	PIK3C2B
636		APH1B	CRY2	ATP2A3	RPL12	TSHZ2	MAP1A	FCHSD2
637		NDUFAF3	ERCC-00096	SOWAHA	MST1R	FARP1	SSPN	TSPAN15
638		LPPR4	LRBA	BAZ2B	ACO1	TACC1	LRRN4	NDUFA8
639		FHL1	DCAF13	NPTN-IT1	DUSP22	CTNNB1	SOD3	RASAL2
640		ALPK3	SYP	PPP1R9A	CPPED1	HPCAL1	ATP5F1B	CYTB
641		TMEM147	KLHDC10	JMJD1C	GPC4	IER2	SVBP	COX1
642		DCAKD	JMJD1C	FAM214A	SNX33	FOLR1	POLE4	C1QTNF9
643		EPB41L4B	SLC25A32	BDP1	SBK1	PPARGC1A	ELK3	CYTL1
644		LIN7B	UBIAD1	BAIAP2	CAV2	CASP7	RPL32	TSC22D3
645		GRAMD4	MAPRE2	ARID4B	GNMT	PTPRF	ADAMTSL1	ATP5F1D
646		THRB	TSHZ2	LDOC1	MICALL1	PARD3	S100A4	HOTAIRM1
647		GSTZ1	PEG3	BAZ1B	TTC7A	PACSIN2	PTPN12	TTC28
648		KIRREL2	ERLIN1	PRRC2A	AP4B1	PTGFRN	RPS5	SIGIRR
649		NRCAM	SLC35G2	SMAD4	ACY3	TJP1	SNHG18	AAMDC
650		GATA6-AS1	PNRC2	CASR	PAIP2B	BAMBI	GREM2	ADAMTS7
651		HEXA	SETX	TIA1	STK17A	TGIF2	PRICKLE1	IFNGR1
652		COPE	CYP4F24P	EP300	ERCC-00136	PQLC3	ITM2A	SPTBN1
653		MANEA	SH3TC1	KLHL2	RPS26P11	RAB27B	PDLIM4	INPP5A
654		DPP6	SECISBP2	WDR17	EIF2S3	PGK1	GSTM1	CEBPG
655		NDUFA1	PIGP	SH3TC1	SOX9	SYNGR2	ATP5MF	TEAD2
656		KIF5C	TUG1	WDR52	ZNFX1-AS1	EPHB4	CPZ	ATP5PD
657		DMTN	CACNA2D1	MYEOV2	ERBB2	AKR1B10	AFAP1	ATP5F1C
658		FBXW7	KIF3C	ZNF154	SFN	MYD88	ABLIM3	STAB1
659		AMER3	PER3	NR3C2	C2	HDHD1	HACD4	C16orf87
660		PVR	NMNAT2	NDFIP1	CAPG	NEDD9	DTX4	DUSP1
661		MEIS3	ANXA6	SUPT5H	GAREM	CP	CPXM2	NECAP2
662		DYNLRB1	KCNA6	LRBA	TES	TSPAN3	JAM3	RARA
663		PRPS1	PRTFDC1	EPOR	GLTSCR2	MFI2	BNIP2	VASP
664		CEACAM19	NDFIP1	ZNF585A	AJUBA	CFLAR	C11orf24	EPHA4
665		PPP3CB	FOXA2	MIR4458HG	NET1	CTNNA1	ITGB5	EDNRB
666		SAMD5	LOC646762	ZNF37BP	CYFIP1	TM7SF3	HOXB5	CCNJL
667		NT5DC2	HNRPDL	DMTF1	SP140L	LBH	PGF	RAP1A
668		POLR2L	KIAA1644	ABCA3	SIX5	PCCA	GOLIM4	MRPS24
669		ABCB10	DNAH5	SHC2	INF2	UACA	GPC6	JUNB
670		CALM1	PTK2B	SCAPER	YBX3P1	KIAA1804	OSR2	PALD1
671		GCHFR	PWWP2A	POGZ	LASP1	ERO1L	NXPH4	ADGRL2
672		LOC730102	NEFM	KIF13A	ATRN	ACTG1	ROR2	C1orf115
673		SH3RF1	KCNQ2	C1orf127	LOC100862671	HLA-B	ITGB8	NDUFA4
674		NDUFB2	DDX17	PNN	CTSC	ATP1B1	FAM101B	CAMK1
675		LAMTOR4	VPS54	PPP3CB	C11orf93	CNN2	NOTCH2	NHSL2
676		CDK10	DDX25	SLC39A8	ARAP2	TC2N	TMEM165	KITLG
677		PDXDC1	KIF5C	NUMA1	TPM1	LASP1	NTAN1	CD200
678		C19orf10	FAM13B	CLOCK	ZNF165	LMO4	CCDC74A	MTPN
679		FAM167A	MED12L	BRD8	TP53INP1	MPZL3	CLMP	C17orf49
680		NPTXR	NCAM1	RANBP2	PPFIBP2	C14orf159	EEF1A1	SNRPB
681		SORBS3	PLEKHG4	QDPR	LAMP3	IL32	DEGS1	PDCL3
682		TCEAL3	PNPLA4	METTL14	POLD3	KLF3	ARF4	BHLHE40
683		ROGDI	CCDC85A	CRTC1	ZAK	DCTPP1	ATP5F1A	ND4
684		VARS	DSCAML1	TPP2	CDCA7L	SDHA	SVEP1	RPL9
685		RGAG4	TMCC3	ADNP	GPR161	FDFT1	RPS2	S100A1
686		GPR114	RUNDC3A	NUP210	CABP2	LPAR2	PLEKHO2	KLF7
687		TMEM258	APOL2	SPIRE2	MYO1C	ADAM10	JAG1	RALB
688		PARVB	RANBP2	PLCB4	BCKDK	STK38L	GPX7	REST
689		TTC39A	STEAP2	LHFPL4	RPL23P8	SLCO3A1	RPS23	PKP4
690		PI4KB	ATM	DMXL2	POF1B	PRDM16	PLEKHH2	ATP5MC2
691		PDIA3	TOMM34	NPTN	NDOR1	ACOT9	PALM	SMIM10L1
692		FDPS	ZNF330	PRICKLE1	CDH1	FAT1	HLX	ATP5PO
693		FBXL15	DNAJC6	KCNC2	KIAA0101	BMP2	MICOS10	LGALS9
694		PTPN13	LRPPRC	KAT6B	CARD6	FBXO34	CDC42EP2	ALPL
695		PDE4D	TNKS	AGAP3	BLNK	CREB3L1	PPP1R14B	PRELID1
696		TRNP1	LYST	SH3BGRL	ARHGEF38	ACAA1	HOXB7	PPP1CA
697		PPP6R1	PHB	NALCN	GAS5	LIMA1	SMIM30	EGLN2
698		RAI2	SRSF6	HECTD4	PDP1	GDE1	KANK4	CNN2
699		SPHKAP	ZXDA	LINC00616	LAMB3	DTX4	GPR153	DNAJC8
700		SYT7	SLC25A12	SLC2A11	MCFD2	SH3BGRL3	MRGPRF	RPS19
701		IFI6	CREBL2	PRKAR2B	MTMR12	NMT2	LIMK1	SMIM11A
702		KCNC4	TIMP2	VEGFB	DBNDD1	GALNT1	PEA15	PMEPA1
703		LAGE3	EZH1	BMP5	TMED11P	TAPBP	PSMB9	ST3GAL4
704		LOC100131564	XPO7	SMARCC2	IDE	LPP	MSL3	SARAF
705		CD81	MAP3K2	MLXIPL	STK24	PSMB8	EIF3F	IRF1
706		SNAP25	EID1	LINC01014	ARSD	PTPN14	CLDN15	GLTP
707		AKR7A2	MAGI2	CAPRIN2	SMAD1	MCAM	C1QTNF2	HMBOX1
708		HECW2	UBE2Q1	ZNF445	BATF2	MARCH5	MARCKS	CASP12
709		HMP19	RAPGEF4	SLC8A1	NXN	EPN3	MSX1	ND1
710		LMCD1	DNAH7	BAG1	METRNL	NTRK2	ZNF521	RPL7
711		ANXA7	USP34	RAB26	DGKA	GNG12	EHD1	CSRP2
712		CLCN6	PITPNA-AS1	FUT8	IFI30	ASAP3	ABCA8	LY6E
713		RFX2	CPE	FBXO32	SH3RF2	UNC13D	GCSH	TNS2
714		COLCA2	FAM178A	ALDH1A1	SERPINF1	SLC38A3	GNGT2	PELI1
715		GAL3ST1	ABI2	FLJ22184	TCF7	KIAA1462	IL15RA	EIF4A1
716		GRIK2	CIRBP	GOLGB1	DNMBP	IL15RA	EEF1D	IRAK3
717		MMP16	VAMP2	CHD6	CDR2	EPB41L4A	BARX1	ATP5MF
718		PMVK	ZFAND6	TMEM132D	NEDD4L	ID2	ARHGDIB	SLC1A5
719		RTBDN	LDLRAD4	ITGA7	TMEM163	ZDHHC1	YBX1	RASGRF2
720		LSM7	ABHD2	C1GALT1	LOC100506388	APH1A	A4GALT	TMEM252
721		GHDC	TTC39A	ATP6V0A1	SLC2A10	KCNS3	GNB4	POLR2M
722		WDR83OS	KIF3B	SDCCAG8	L3MBTL4	ADM	SMIM11A	HPCAL1
723		SNTG1	MLL3	SALL2	ACOT9	CHP1	CHST3	PPT2
724		NEK1	DUSP6	GNG4	C12orf45	TPD52L1	APOBEC3C	IFI44
725		MZF1	PRKAR1A	MAP3K4	SLC41A1	CRIM1	MXRA5	SYPL1
726		SLC35G2	HERPUD1	DPYSL2	SP100	TMEM159	SLC16A4	AKAP13
727		MSANTD1	ZC3H6	KIF3C	F11	REEP6	DSEL	SERINC3
728		SYT17	NAPEPLD	PDS5B	CLDN7	YAP1	RPL23	TRPV4
729		FAM135A	GRIA2	WDR6	TJP3	SHROOM3	RPL13A	NUDT4
730		AAED1	STMN3	NOL4L	UNC5CL	EFNB1	ATP5PD	SVIL
731		SMC2	EIF4B	PER2	PDE4A	MALL	H3F3A	PDLIM7
732		NDUFB11	NEMF	SUCO	RPS27L	UGP2	CPNE2	LYL1
733		TCEAL5	TAGLN3	C2orf68	FRMD8	ELOVL1	ZFHX4	ATP5F1A
734		CHAC2	LINC00616	EID1	LOC100132891	VMP1	MIF	HNRNPF
735		UPB1	SS18	IPW	KRT18	LRP10	DENND5A	CTTNBP2NL
736		TMEM74B	TMEM37	GRAMD3	CAMKK2	MCCC1	ADA	RPL17
737		RPH3AL	RBM23	GBA2	KIAA1161	GLUL	AP2M1	TPST2
738		MYL6B	RGS22	ISCU	SETD7	MPZL1	WBP1L	ZYX
739		AK2	CRMP1	MCF2L	SERINC2	RDH10	RPL41	TDRP
740		STMN1	IGSF1	LOC441204	EEF2K	PTP4A2	GMFG	CD38
741		MAGIX	PACRG	MINK1	KIRREL2	HDHD3	P3H3	VANGL1
742		SHFM1	HOOK3	FBXW7	MARCKSL1	RARG	IL16	SLC48A1
743		SLC3A2	VASH1	CDK5R2	ERCC-00046	AJUBA	FAM180A	STOX2
744		POMGNT1	NTPCR	DENND2A	FOXA3	SNAP23	EIF4A1	XAF1
745		FFAR2	PTGDR2	RCAN2	ACADL	FRMD4B	HYPK	TMEM44
746		BTD	TTC14	YTHDC1	SH3D19	RCC1	GPR161	IFNAR2
747		ANAPC11	SPRED3	USP37	MKNK2	TLE1	ADCY3	PPIC
748		TPP1	C12orf76	ATRN	STAP2	CARD10	LIMS2	PTPN14
749		HIPK2	FAM131A	SPTBN4	WWC2	CGN	MYO9B	DDAH2
750		CERS4	SLC12A6	TTC17	ASS1	ZBTB20	GJB5	GGTA1P
751		FRYL	MAN1A2	CEP112	TPGS2	MAFF	PROCR	CRYBG3
752		SEC31B	ACACB	AES	IL4R	BAZ1A	UBE2E2	PSMB3
753		WNK4	KIAA2022	WNK4	RNF144B	MOB3B	CCDC71L	FOSL2
754		MYT1	CDK20	CAMK2D	EML4	TANC1	DES	CR1L
755		CCDC88A	FBXO16	PCMTD2	DOCK5	CASP10	RPL37	CHIC2
756		MANEAL	TSPYL1	TRIM52-AS1	AGMAT	CALD1	HAND2	TCF3
757		STARD3	ARHGEF26	CIRBP	CHMP4C	CASP6	GUCY1A2	MCTP1
758		C7orf50	RAD17	SEZ6L2	REPS2	WWC1	CYR61	COX2
759		SYN1	FAM46A	ASH1L	ERCC-00096	TMEM144	EHD3	TNFRSF1A
760		LINC00261	HSPB11	FLVCR1	ZSWIM6	FXYD2.1	RASL10B	RILPL1
761		CERK	PELI3	DIP2A	GALNT12	MGLL	FABP3	EIF3C
762		DEAF1	SH2D3C	MPHOSPH6	C1orf106	SNX10	ATP5ME	HOXA5
763		RGS17	B3GNT1	SNRNP200	PALM3	ALS2CL	TRIM22	TSPO
764		C1orf86	LMTK2	AGAP1	RPS10-NUDT3	C3orf52	FLNC	ADAM19
765		STXBP1	MEIS2	LZTR1	YAP1	LGR4	BST1	ASAP1
766		MISP	RINL	KDM5D	FRAT2	WDR72	ATP5F1C	MYDGF
767		CDIP1	CASZ1	PCNT	PRR15	NEDD4L	TRIM5	RPL35
768		SYNE4	EIF4A2	PRRC2C	ATF5	MAT2A	PYGL	TNFSF12
769		MIR6887	PAIP2	CEP350	AP5B1	TEAD2	TCF7	PKN3
770		KCNAB1	WSCD1	ENOSF1	CHST11	B3GNT7	TAX1BP3	PWWP3A
771		CLSTN3	ALDH5A1	SREK1	WIPI1	TUBB	KLF13	MARCH2
772		PKD1	CEACAM1	KIAA1109	GNPNAT1	RAB11FIP4	STON1	RBM7
773		AHI1	SRSF8	MANEAL	HDHD1	GRHL2	TMEFF2	MICOS10
774		DPM2	ASNS	SAMD11	ERCC-00113	EFTUD2	ATP5MC1	C19orf33
775		SERF2	WDR35	C2CD5	RRAS	RNPEP	EXT1	FBXW2
776		HAGH	SPICE1	RIPPLY3	TRIB1	APOL1	C2CD2	SEMA7A
777		ITPK1	TTLL6	ARMCX2	DTNA	ANKRD10	UQCC3	HYPK
778		TOX3	KRT10	UBXN6	ZNF189	WEE1	GBP1	NCK1
779		FKBP8	RNF38	HIPK2	RNF144A	AKAP13	IL34	ATP5PB
780		TMEM175	RGL2	AK9	TRIP6	KIF1C	RHBDF1	CCM2L
781		SCAMP5	BCLAF1	EPB41L4B	GBP2	TRIB1	RPS12	CAV2
782		ND2	SKIV2L2	HMGN3	SIK1	MUM1L1	RAB32	CRLF2
783		B3GAT3	AGPAT4	IGIP	ZNF300	TLR3	RPL26	GEMIN7
784		EGR4	OLFM2	PP7080	PRELID2	ARRDC3	B4GALNT1	RPL6
785		NCALD	UNK	LRCH2	SLC15A2	HBEGF	FAM49A	STIM2
786		ESYT1	MDFIC	BEX4	CRNDE	PFKP	KLF7	RPS29
787		ATXN2	CERKL	SNHG9	HSPB8	SLC39A1	LOC100130872	CASP8
788		IDUA	FAM122A	TIPARP	EFNA1	TOR4A	NUMBL	SMOX
789		NDUFB1	HERC2P2	DSP	HSD17B4	ANGPTL4	IRAK3	SEMA4C
790		CPT1C	CAPN7	AP1B1	PHGDH	PSMB9	MICOS13	FAU
791		BCAS4	NBEAL1	PNPLA7	MCL1	RNF149	RPS4X	MBNL2
792		DMXL2	NR0B1	RBM26	ADA	PPP1R15A	MGST1	HACD4
793		CCM2	C1orf27	DAPK1	FBXL19-AS1	EIF4EBP2	MARVELD1	CDK11B
794		UNC80	RPL15	EXOC2	KLF3	ARHGAP26	FAM13C	ZDHHC18
795		COPZ1	KIAA1107	LNX1	RLIM	FA2H	CDK4	PSMC1
796		SERPINA1	B3GAT1	KCNJ11	TLE4	PRKCA	HOTAIRM1	MARC2
797		CKMT1B	MYO3A	ZMIZ1	BAZ1A	PROSER2	CD9	ATP5ME
798		KLC2	ITGA6	EGR1	SMTN	TNKS1BP1	QKI	LAMC1
799		PTPRD	CAP2	CHM	CASP10	DHRS7B	MRPS24	TOX2
800		TP53TG1	EHBP1	USP53	PEAK1	WNK2	YBX3	KLF9
801		GDAP1L1	SCN8A	BLMH	CCNYL1	CARD6	SMOC2	EXOC3L4
802		FOXP4	C21orf58	PIAS4	SLC19A2	LMO7	CHST11	NRROS
803		ATP5G2	AMZ2P1	PGRMC2	COL4A4	POLD4	ACOT9	SLC6A6
804		GIT1	COG3	RAB3B	PDGFRL	B3GNT5	SULT1A1	CLIC5
805		GNPTG	NPC1L1	NCDN	KDELR3	DHRS7	SKI	CTNND1
806		PNPLA6	LIMS1	MFSD6	BAALC	VAMP8	HVCN1	GNB4
807		TPD52	SH3GL2	CHD9	BMP2	ATP5B	FZD4	SPRY1
808		CYB5D2	CHM	STMN3	PHLPP1	SRC	SAR1A	CHST2
809		BTAF1	IMPAD1	TUG1	MUC20	IRF1	RPL4	MYCN
810		LOC642366	LOC100129046	B3GALT2	GNB2L1	MIR492	EFNB2	MYO10
811		PEG3	XIAP	ECHDC2	CASP8	LRRFIP1	RNFT1	SP100
812		NPTN	MAP1A	LENG8	KCNE3	TCEA3	PKNOX2	RPS26
813		GYLTL1B	MUT	PIN1	CXCL6	SLC16A3	CTSB	RASGRP2
814		FBLL1	SEMA4D	MLLT10	MPV17L	HLA-C	SLC6A9	HOXB4
815		C19orf70	TMEM167A	NEO1	TRIM24	CRK	GAS2L1	VGLL4
816		CPNE8	LRIG1	ZNF711	IL18	ARL4C	FLT3LG	RASSF1
817		USP13	METTL23	FLYWCH2	ANKRD50	EGR1	HSPA12A	PLSCR3
818		SYT4	ZNF655	HDAC6	GRTP1	DDAH1	RFX8	FBN1
819		NOMO1	IFIT1	KIAA0895	TYMP	STX7	OSBPL5	RPS18
820		FAM173A	ARMCX3	MYRF	NOSTRIN	PHLDA2	PDE4A	AKAP2
821		UBE2O	LPIN2	C9orf78	NARF	STAT6	ARHGAP42	CCNYL1
822		SLC50A1	PDE4DIP	PLCH1	GSDMD	B4GALT4	EXTL2	RIPPLY3
823		LGMN	ZNF280D	C11orf71	HSD3B7	PPIF	FHOD1	RPIA
824		FNDC3A	KCNJ11	MECP2	MCU	NR0B2	TRIP6	PLEKHG5
825		TMEM198	AHCTF1	GLG1	RAB32	TJP2	PLPP1	KIF26A
826		LSM4	SESN1	USP11	SLC35A3	PSEN1	PDIA4	SH3BGRL3
827		TLE6	CBFA2T2	WDTC1	PACSIN3	FGF13	PRR5L	ADA
828		TMEM63C	TSGA10	CSTF3	FAM129B	SHMT1	FAM118B	CZIB
829		KIAA0895L	CDK2AP1	GNAQ	MGAT4B	IFNAR1	FKBP14	C11orf95
830		GUSB	FGFR1	C21orf58	PLOD1	SPECC1	ST6GALNAC6	CASKIN2
831		LTBP3	MYCBP2	SNAP91	BCL2L12	ILDR1	GSTA3	PHLPP1
832		ULK4	SLC8A2	DNM1	FAM171A1	COQ9	TSPAN4	NOD1
833		FAM210B	DNAJC27	PROCR	ALPK1	RELB	HOXB3	OSMR
834		SPATC1L	COPG2	LDB1	TIFA	TCIRG1	NR3C1	GASK1B
835		SPTB	FAM228B	GPRASP1	SPSB1	ZDHHC7	TSHZ2	RPS15
836		RCAN2	FAM131C	KIF3B	NLRC5	TBC1D16	OAT	LAMB2
837		MRPL53	USP48	ELL2	ACSS1	RAB25	GLI3	NLRC3
838		HAAO	BSN	ARHGAP5	FAM198B	PSMB10	EFNB1	ZBTB46
839		RABL6	QPCT	SCG5	GOLM1	BARX2	RECK	TBKBP1
840		KLKB1	FAM208A	PTPN13	PHLDA2	NLN	LGALS3	ARHGAP10
841		FBXO2	OTUD4	CDS2	ANKDD1A	PPP1CB	COLEC12	PON2
842		SLC9A7	VPS13C	KIF1A	ZDHHC16	BTG1	ATP5PB	IL2RG
843		DENND4B	NECAB2	FAM134A	PEX11A	ACTR3	SNX33	ARHGEF1
844		PIN1	MIR100HG	IRS2	DNAJC22	HADHB	RAB3IL1	FMO2
845		NPAS4	CTNNA2	IVD	DMD	RSU1	OASL2P	SNAPC5
846		ZNF462	FAM214A	LOC100131564	SERF2-C15ORF63	RIPK4	SMO	CBX2
847		HIRIP3	C21orf62	L3MBTL1	MARVELD3	PLBD1	EEF1B2	MGAT2
848		SPCS1	WASL	GABARAPL2	MLXIP	RTP4	TWIST2	RPL24
849		SLC25A22	SLC26A4	ST8SIA3	ALDH1L2	ACSL4	PTPRG	MAPK11
850		PRPF8	NDUFA5	SMIM6	MTAP	MAP4	RAP1B	EPHB1
851		FAM3A	ZNF605	RAB6B	CRLS1	PTP4A1	PLA1A	CTSV
852		SOWAHA	GUF1	CCNL2	ESRP1	LMNA	PHLDA2	TRIP10
853		NAA38	NCOA1	DKFZp686K1684	AMOTL1	APP	OSMR	LHX6
854		EHHADH	NAP1L2	PFKM	SECTM1	FAM3B	PIGY	ADPRH
855		OAZ1	CEP350	UBN2	DPP3	HMGA1	RPS25	RDM1
856		SRRM2	TRAF3IP2	NR1D2	SNAP23	TMEM54	CHIC2	SNX3
857		CHD6	ATXN10	RFX3	ABHD11	TRAF4	MIR100HG	ARHGDIA
858		ENTPD6	LYRM7	MAZ	ARHGAP32	SMAGP	PLXNA1	GJC1
859		CADPS	PCNT	GNAZ	SP110	TNFAIP8	TP53	DOK4
860		SIK3	WDR26	JSRP1	CLDN1	DEGS2	SH3GL1	BAK1
861		MAP3K9	PPM1B	BIVM	FAM89A	EZR	FGFBP1	GCN1
862		KCNK1	SOCS7	ILF3	TMEM125	EPB41L1	YAP1	GAS6
863		ATP5J2	SGSM1	NPM2	RNF44	LPGAT1	RPS14	FAM129B
864		RGS11	KIAA1407	PHF12	RHBDF1	PSG4	EPB41L2	RHOB
865		HMGN3	ERCC-00171	TM4SF4	CDR2L	CLUH	SNTB2	SKAP2
866		VPS26B	CSTF2T	MDM4	RPL18A	OCIAD2	LOC400043	MAP3K3
867		ENAM	MIA2	MOCS2	SPTLC3	RELA	TMEM234	RPS14
868		FBXL16	UBA5	EIF3J-AS1	RPS2P32	CNGA1	FAM129A	FBXL7
869		RASGRF1	GNE	SEPN1	EIF4EBP2	MUC15	SLIT3	EIF3F
870		OS9	ASH1L	KIAA1467	GPX8	RHOU	NIN	WASF2
871		NUP210	DDX60L	GPATCH8	EZH2	GUCD1	CARD19	SLC35E4
872		ETNK2	SMIM18	TRPS1	CRYBG3	SLC25A24	ATP5F1E	KTI12
873		CKMT1A	FAM104B	RSF1	LOC440335	ID1	ARHGEF25	SCARB1
874		PTOV1	HPGD	COL9A2	SLC25A15	CCDC6	RPS20	MAP2K3
875		MAPRE1	KRBA2	PCMTD1	LAD1	EPPK1	CBR3	SPTSSA
876		SPRED3	MBTPS2	EMP2		DYNLT1	PFN1	CTSZ
877		TRAPPC6A	RGAG4	LINC00888		IFNGR1	FUT8	RGL2
878		TOMM34	FLVCR1-AS1	ACOT7		NDFIP2	PI15	CENPA
879		MAN2C1	TNPO1	TRIM28		ERV3-1	RPS27A	DEGS1
880		HOOK1	CMSS1	WWP1		TMEM120A	SDCBP	PSMB8
881		TOLLIP	CORO7	GRINA		NFIX	SLC43A3	VEGFC
882		MDK	APMAP	TNPO2		ARHGEF40	IGDCC4	SKI
883		HSPA2	UNC13A	ABCA7		SYNGR1	ARHGEF10	SHISA5
884		ATP5I	TRIQK	ADAM8		MTFP1	ATP5MC2	MDFI
885		NDUFS7	ADARB2	TNFRSF11B		GSTT1	RBPMS	RALY
886		ACLY	MAATS1	RCAN3		CD68	GLIPR2	RIPK3
887		ABCA7	FAM161A	SAFB2		TNFRSF10D	WDR89	LMCD1
888		ADCY2	LOC100288911	TNKS2		ADORA1	ISG15	CHST7
889		COG1	REV1	TNK2		LRRC59	POLR2M	TPRG1L
890		TMEM106C	ME2	CHD3		FAM84B	ST3GAL2	DKK2
891		PPP1R3F	SENP6	UBE2O		SLC45A4	MGAT2	ADGRE5
892		DGUOK	GDAP1	ZNF76		CDKN1A	ARHGAP20	RGS19
893		MAGEH1	PCM1	KIAA0195		TAX1BP3	NPR2	PCSK5
894		PRKCQ-AS1	LTA4H	FNIP1		HEXB	GPX1	RPS10
895		FBXO17	ATP2A2	ADAR		FAM129B	PTPN9	APP
896		B3GNT8	THNSL1	IKZF5		TRIM16	PENK	PEAK1
897		PPP1R3B	ALCAM	KLHDC3		CD97	AGPAT4	RPS9
898		DRAP1	NEK4	CREBL2		CTTN	RHOC	LIPE
899		AQP7	MADD	SGSM1		TMOD3	UBE2L6	MUSTN1
900		JAKMIP2	AGBL4	PLXNA2		C1orf116	RBMS2	DPYSL3
901		FAM83F	ZNF24	WDR59		ATP5C1	IKBKE	AMOTL2
902		NHP2L1	MLL	FAM200B		SYNE2	RARG	ACER2
903		NUCKS1	FOXRED2	SETD2		TMEM45A	APBB2	RPL32
904		CELSR2	STXBP5-AS1	PRRC2B		PNP	RASSF8	CFAP20
905		C1QTNF4	DNAH12	DDHD2		C4orf19	CHST1	FAM181B
906		LOC158960	ITM2C	RALGAPA2		TMEM136	FKBP1A	FYN
907		DNMT1	SLTM	DZIP3		PDIA5	L3HYPDH	RNF215
908		PHKA2	EMC2	JHDM1D-AS1		MYO10	TBC1D2B	DCBLD1
909		GUK1	ATP6V1H	GPR180		CLIC1	ATP5MG	GNG5
910		MLYCD	KBTBD7	FMN2		HEG1	COX6B2	WWC2
911		PDIA3P1	RICTOR	RNPC3		DST	FDX2	CBFA2T3
912		ARL3	USO1	CREBZF		TWF2	ALDH1A2	KANK2
913		CA11	ORMDL1	USF2		TNFRSF21	ARHGAP23	BTF3
914		C14orf2	ARL13B	DTX3		ARSD	CMAHP	CFL1
915		HLA-G	TMEM131	ANKRD12		SNCG	SRGAP1	ANKRD29
916		FOXA3	VAMP4	PTPRJ		DENND2D	G0S2	PXDC1
917		UBL5	CAND2	ZNF280D		FGFBP1	FTH1	IL3RA
918		CD200	GAREM	SUGP2		ITPR2	GALK1	RPS16
919		NAT14	WDR19	MON2		PLEKHJ1	S100A11	IPO11
920		GOLGA7B	C9orf78	NDST1		TMC4	SOCS3	GJA5
921		SLC12A5	TNRC6A	MEGF9		ADI1	RABEPK	PALM
922		STAT5B	STXBP1	MAPRE3		TMEM43	PPIA	RPL39
923		PLA2G6	ADH5	EPB41L2		TUBB4B	PLS3	LFNG
924		DDX25	SMG7	RBM5		HLA-F	EBF2	ZDHHC20
925		SEC14L1	USP9X	MBNL2		TUFT1	SSR3	MAFK
926		ITFG3	DLGAP1-AS1	PNMA1		BLVRB	REXO2	ELF1
927		CACNA1C	TCEAL1	FFAR1		GSTK1	SDC2	RALBP1
928		TLE2	TMEM63C	MR1		RRAS2	C12orf57	DYNLL1
929		ZNF85	DLEU1	HERC2		SGK1	ADAMTSL5	FAM53A
930		DNPH1	GNA12	CALY		TRPM4	SLC39A8	PCP4L1
931		PPAPDC1B	EDEM3	ATF7IP		H6PD	TCF7L1	CRAMP1
932		FRRS1L	ZNF10	USP9X		NBEAL2	ARHGEF6	HOXA3
933		CTBS	TOX2	SON		ABCB1	PTGER2	HHEX
934		LPPR5	LDOC1	UBL3		MYADM	LOC541471	CRK
935		NAV1	C16orf72	ZMYM4		FOSL2	SERTAD1	ALOX12
936		EPOR	SLC22A4	ACAP3		KIAA1671	IFI27L2	IQSEC2
937		SIM1	NPIP	THRA		EPS8L1	MPDZ	IL6ST
938		TMEM145	CCDC101	GOLGA4		LYPD6B	TET3	CENPB
939		ELP4	UBN2	ILF3-AS1		GALK1	PTMA	SAMHD1
940		PDGFRL	PLSCR4	WNK1		TTN	RPL27A	PDGFD
941		ATP5L	SNX2	OAZ2		TUBB3	ACVRL1	GIT2
942		ND1	ARID5B	PRPH		CARHSP1	RPL35A	KIAA1671
943		PRRG2	PLCB4	CRKL		HOGA1	WWTR1	FABP5P3
944		TMEM80	TRIM13	FANCL		SOAT1	SLC31A2	OAZ2
945		VDR	ABAT	DOPEY2		TAP1	MDFIC	OLFML2A
946		LOC100216479	SEPW1	DCAF7		WWC2	GXYLT2	NTF3
947		EMB	PUS3	EPM2AIP1		NECAP2	POLD4	CHST1
948		ARFIP2	IPW	MYT1L		PARP4	MTPN	XDH
949		BTG2	FAM105A	FNDC3A		PKP4	MOSPD1	RPS23
950		TYK2	LOH12CR2	SEC24C		TRIOBP	TNS2	MAP4K4
951		TMEM42	TENM1	ZBED5		NFE2L2	TAP2	RBPMS
952		PARP6	C11orf71	ATP6AP1		CCDC141	SFR1	PCNX1
953		NEBL	TCEAL8	MAML3		DOK5	HIP1	SSUH2
954		RAB11A	SLMO2	RNF111		KDM5B	RPL12	TIMM17A
955		EML5	SMEK2	PPP5C		MACC1	RPS13	TASOR
956		HMGCR	STMN1	SMOC1		GSTM4	AHRR	ARF2P
957		C16orf58	BTF3L4	USP34		PDCD6IP	FAU	CTDSP1
958		GJA3	HYDIN	SELENBP1		SPPL2A	VAMP5	RPS5
959		SOX5	NRXN3	ZNRF3		ZNF704	TNKS1BP1	LAPTM5
960		PPFIA3	EPT1	FAM219B		UXS1	NABP1	CDR2L
961		CDK5RAP1	KCNN3	PKIG		PARVA	BCL7C	TNFRSF1B
962		RPS17	BCL2L11	WDFY3		IFNAR2	DBN1	ADIPOR1
963		SCAND1	PRPF8	TSR2		DNAJC22	CREG1	GALNT15
964		PRDX5	WDR47	ARID3A		ST5	PIK3R1	FAM53B
965		SPTBN4	FBXO41	NCRNA00185		H3F3B	MT2A	ING1
966		CXorf57	RAPGEF6	GSTM2		CPPED1	KDELC1	SLC49A4
967		FLNB	CHORDC1	SUN1		AHR	PRICKLE2	TMTC1
968		CNNM3	ATF4	ENPP2		FGFRL1	SMIM1	RNF122
969		PGAP1	PPP6R3	TDRD6		PDHA1	DDX39B	SUMO2
970		DCTN3	TAB2	FAM195B		TMEM50A	UBE2E1	ADRB2
971		PPP1R14C	DHRS7	PSIP1		TGFBR2	CNPY4	GPAT4
972		IRF6	ARMCX2	GALC		CTNNAL1	SFXN3	ELOVL1
973		TCEAL1	STAG2	PLEKHA5		GALE	CACNB3	HOXD4
974		CAPZB	BAZ2B	CLCN5		UNC5CL	C1QTNF1	HSPB1
975		KAT2A	SEZ6	SVIP		EFNA4	NRM	CCDC85A
976		CALCOCO2	CNKSR3	PI4KA		CLDN6	FHL1	KLHL6
977		ADRB1	SPRYD3	PRICKLE2		GOT1	NACA	PRPF40B
978		UROS	PDS5B	GOPC		TMEM217	CNRIP1
979		MAOA	POLK	MLXIP		KIFC3	ADO
980		SGSM3	IPO8	FAM193B		SEPHS2	SEMA4C
981		TRIM3	ZNF44	MAN1B1		PDE3A	AIFM2
982		STXBP6	TRIM2	ARF3		ERP27	PXDC1
983		CCDC24	LAMTOR3	CBX5		ARSE	ARPC1B
984		HTT	NUAK1	PPP6R2		SERPINA1	ASAH1
985		GOLGA2	PPM1A	RANBP3		SYK	CTDSP1
986		FAM127A	DCTN4	SYT7		CHMP4C	SLC9A1
987		B3GNT9	AMPD2	EBLN3		LDLR	TEAD3
988		CUL7	UNC79	XPO1		MLLT4	DOCK11
989		COX7A2	ATCAY	BTG2		GABARAPL1	SNX21
990		WNK1	LIN7C	SYP		LAMP2	DPEP1
991		PSMD5-AS1	PRPF38B	DKFZP586I1420		HMOX1	NEK6
992		RNF157-AS1	AKIRIN1	ANKRD65		DERL1	SCN7A
993		XIST	NAP1L1	LRP3		MYO6	LUC7L2
994		NDUFC1	WAC-AS1	USP24		ABI1	DRAM1
995		ZNF618	SPIN3	TOLLIP		STEAP4	SRA1
996		PER1	DNAH6	ARID4A		MYZAP	HS3ST3A1
997		FBXW4	CRKL	SRSF11		SSH3	NDN
998		HMGN5	THAP5	NUP214		SUN2	EIF3C
999		ATP5MG	FBXO10	IKBKAP		MIPEP	TRAF5
1000		TMEM236.1	LRRC37A4P	ZNF451		ITGB5	EVC
1001		DNAJC12	SPEG	PBLD		PYCARD	CHRD
1002		PER2	S100B	KRT222		HYAL2	FST
1003		CD164	GNAS	GTF3C1		CTSO	SIRPA
1004		RIPPLY2	MKLN1	GSTO2		PLEKHA4	RBM3
1005		ST8SIA1	CDK5RAP3	ZSWIM8		DECR1	TRIP10
1006		LYST	APC	DUSP8		FRMD8	CDR2L
1007		NAAA	ALDH9A1	CD81		GATA6	GLMP
1008		LARP4B	EMC10	VIL1		CEBPD	MPRIP
1009		PGRMC2	CLGN	RBM6		PGM2L1	SERPINB8
1010		CCDC57	SDK1	YWHAH		COX5A	GAP43
1011		SCRN1	HCN4	TXNIP		CISH	NRXN2
1012		ATPIF1	MON2	MGAT3		SLC41A2	HSPB2
1013		LRRC10B	FAM208B	MAGED2		CLCF1	RPS24
1014		TARBP1	CCDC117	SPEN		TNFAIP1	CDC42EP5
1015		PPP2R5B	NR3C1	LOC101928796		NAALADL2	JOSD2
1016		SEC13	CYP4V2	HCFC2		SLC12A7	ADAMTS10
1017		CAND2	PARK2	PIK3R3		RRAS	SWI5
1018		HAX1	VEGFB	PARP6		GALNT18	TEK
1019		TMEM14A	RBBP8	CLK1		RNF144B	YIPF4
1020		SEC22C	USP27X	CALCOCO2		IQCA1	HDAC7
1021		VPS28	TMEM64	USP7		EPS8L3	CAMK1
1022		IER3IP1	SLC7A5P2	SNX10		FERMT1	EXT2
1023		DTD1	LARP6	IRGQ		WAPAL	ATP5MC3
1024		NCKIPSD	MSANTD4	MAN2B2		DPP3	RPS11
1025		AARD	BANK1	SYT4		VGLL3	ND2
1026		LOC283177	CD200	GIGYF1		PLXNB2	PLEKHG1
1027		RAP1GAP2	MEAF6	CCDC88A		RCC2	NDRG2
1028		C1orf56	RNF212	TMEM259		SUCLG2	XDH
1029		P2RX4	DOK6	DNAJC12		NUPR1	ABHD4
1030		PCYOX1L	MRP63	CELF3		SLC46A3	GPM6A
1031		ZNF331	ERCC-00113	CAPN3		DHX32	STEAP3
1032		ARVCF	KAT6A	STXBP5-AS1		HLA-DPA1	ZNF697
1033		CLOCK	ABHD10	JADE2		ST3GAL1	WBP5
1034		NAP1L5	SYT14	CARKD		ADAM28	EGLN2
1035		SSBP4	SLC46A3	WAC		KLHL24	RASL11A
1036		PCNT	PHC3	ABLIM2		CD276	HACD1
1037		BCKDHB	SEC24D	CGGBP1		THUMPD1	ILDR2
1038		EPB41L3	ANGEL1	RORA		TMED9	PSMB10
1039		UXT	KCTD6	HEXIM1		AGR2	RGMB
1040		SHROOM2	MS4A8B	VAMP4		CRB3	FYN
1041		LINC00888	HLCS	LINC00643		SMOX	RPL27
1042		UBB	PURA	RABL6		GIPC2	PCYT1A
1043		VWA5A	ATP6V0A1	FZD5		MRPL15	RPLP2
1044		SNAP91	CCDC93	SCAMP5		PALMD	UST
1045		TRAPPC4	DSTN	FHL1		FGD6	SERF1A
1046		NKTR	NUFIP2	HUWE1		BCL2L1	PTPN14
1047		RXRA	UHMK1	LAT2		GPRC5A	SLC44A1
1048		CERS6	SH3BGRL	LEPREL2		CLIC4	NEXN
1049		CHCHD7	UAP1	STRA13		ASRGL1	MYL12A
1050		COBL	ACN9	PRPF4B		CLCN2	PARP3
1051		MAN1C1	RAB27A	PIGY+PYURF		MTAP	ZNF771
1052		ACYP1	STIM2	ZNF24		ZNF217	LAPTM4A
1053		TSPYL2	LINC00271	TMED6		RAB11FIP1	CTSZ
1054		KRTCAP2	GCC2	MARCH6		SLC16A5	PPIB
1055		SEPN1	KRT222	ACYP2		MUC13	FZD1
1056		EMC9	IKBKAP	PPY2		CXXC5	NPM1
1057		KCNB2	AZIN1	TRIM13		DUSP5	CCDC102A
1058		SSH2	AHSA2	PRR14L		RBM47	FZD2
1059		PEX6	DHX40	ADRBK2		SLC19A3	MGARP
1060		MAST3	NUDT16	CAPNS1		ACAT2	RPL34
1061		MAPRE3	KIAA1456	AP3B2		POLE4	HSPG2
1062		TXNL4A	CAPRIN1	ACIN1		ELOVL7	RAB7B
1063		HTATSF1	UBR1	SULT4A1		HSD17B11	MT1A
1064		HNF1A	GOLGA8B	GABPB1-AS1		FADD	RDM1
1065		BNIP3	STRADB	PQBP1		IQGAP1	FLJ42709
1066		DIP2B	PKI55	B3GNT1		CDK18	CPED1
1067		PNPLA7	RPF1	ATP6V1B2		RALY	MYDGF
1068		PHIP	MDH1B	CDK2AP1		GMDS	RNF152
1069		ATP5F1E	OCIAD1	TEX2		RAB20	RPL22
1070		SEMA5A	CD9	SNCA		TMEM132A	MAF
1071		TSTD3	ST3GAL1	DENND4C		APEX2	ARHGAP31
1072		SELK	CTNND2	SMPD3		FLOT2	BICC1
1073		RORC	SRSF11	TTC14		CDC42EP5	NKX2-3
1074		SLC16A12	MAPK1	COMMD6		IL8	EIF4EBP1
1075		SARDH	PGRMC1	ARIH2		FAM89B	BAG3
1076		MYO5A	MLH1	LOC100506548		DSEL	CR1L
1077		CAMSAP3	ST13	LLGL2		IMPA2	AHNAK2
1078		GNE	FAM161B	GIT1		MAPKAP1	IFNGR1
1079		SCARNA22	COX11	ATP2B1		CNOT8	ANXA8
1080		RBM6	PFKFB2	SNHG3		GSTA1	SMIM10L1
1081		LOC100129361	ATP6V1D	SUPT6H		PHLDB2	LDHA
1082		SMIM4	GLCE	PVR		PHLDB1	PLBD2
1083		IMMP1L	LINC00657	FTO		MITF	TPST1
1084		EIF1AY	WRNIP1	ELAVL4		MST1L	CORO1C
1085		ATP6V0A1	UBL3	NCOR1		TP53INP2	RER1
1086		SGSM2	ZBTB4	DNALI1		DIRC2	NME2
1087		TOPORS-AS1	IFT88	SSBP3		EBP	IER5L
1088		SMIM22	JPH4	DCAF16		BBC3	HOXC4
1089		PIM2	TMEM126B	SPAG16		SNN	FAM92A
1090		LINC00936	GDAP1L1	VPS13A		DDX52	GATD3A
1091		RALGPS1	WAC	ENO2		SPHK1	UPK1B
1092		DCXR	N4BP2L2	MAPK13		SEMA4A	ARHGDIA
1093		KIF21A	DZIP3	DSCAM		RER1	WTIP
1094		MRPL55	BDP1	MARK1		TMEM62	TMEM173
1095		PVRL1	PMPCB	PTCD3		EIF4E2	PALM2
1096		STMN2	PPP2R1B	PCSK1		GPR125	UAP1
1097		ACTL6B	HCN1	GNA11		PLET1	GJC1
1098		NPM2	ATF2	STAG2		GNG5	TCF3
1099		CCDC159	KIFAP3	SSFA2		FEM1C	ATP5IF1
1100		CHKA	MGC27345	SLC39A13		GPR126	MARCH2
1101		LOC100287592	CDON	BTBD2		C12orf49	ADAMTS7
1102		FAM117A	GOLGA7	CTAGE5		CAT	PRDX1
1103		AATK	KIAA1598	C5orf42		GOLPH3	VGLL3
1104		RFX3	TULP4	ZBTB44		KDSR	XYLT1
1105		B9D1	PI4KA	PRKAR1B		UQCRC1	B4GAT1
1106		VKORC1L1	GAB2	POLR3A		CAST	ADAM33
1107		ANAPC13	CEP44	ANKRD11		CALML4	EVC2
1108		FLVCR1	MTX3	HIVEP3		STXBP3	BOLA2
1109		DIP2A	FAM120A	RBM23		RHBDF2	RCN2
1110		FLJ22184	DHTKD1	SLC4A3		PDE5A	PLA2R1
1111		UGGT2	ERO1LB	ARHGEF4		TRIM38	RAB28
1112		SCAMP4	XRCC1	TP53TG1		MMP15	RBPMS2
1113		ATOX1	C11orf63	PDZRN3		XRN2	LMCD1
1114		LARP1	CEP57	AAK1		RAP2B	AP3S1
1115		ALDH5A1	CCDC152	DHX29		HEBP2	JDP2
1116		FN3K	TUBA8	DNAJB2		TP53	EML1
1117		SLC27A5	ARHGEF38	RUNDC3B		VWA1	CXCL12
1118		SF3B2	RYBP	ATP6V1C1		SMS	ERCC1
1119		EEF1A2	RIF1	ZNF33B		ACADVL	SAMHD1
1120		INPP4A	RBBP6	HDHD2		SKIL	IRS1
1121		EPM2AIP1	GCLM	PODXL2		PROM2	CNIH4
1122		SMDT1	SCCPDH	NCKAP1		FBP1	ABHD17A
1123		USP11	KBTBD11	MYO1B		TMEM41A	ARHGAP10
1124		PARP9	ZNF502	TMEM17		CEBPB	ADAMTSL4
1125		CD27-AS1	CREM	ZNF148		LIMK2	CZIB
1126		AP2A1	GNS	IST1		CD2AP	ARL4A
1127		C17orf89	SIPA1L2	CHDH		LOC644936	FZD7
1128		PLXNA2	RGL3	CA10		ARHGAP29	HOXB4
1129		ATP5MD	RAI2	STK33		FAM111A	PROS1
1130		PTGER4	C7orf50	RASSF7		SPATA20	TMEM221
1131		MAN2B2	LOC283070	MAN1A1		ZNF552	ARSB
1132		XRN1	ZNF264	GUCY1B3		LOC100129034	DDT
1133		CTXN2	TSPEAR	NCOR2		CBX3	PPP1R9B
1134		ROR1	ZFP14	UBR2		TP53BP2	OSBPL1A
1135		HNF4A	MECP2	TTLL12		G6PC	PTH1R
1136		TNRC6B	HSF2	SNX4		ARF6	CYP2S1
1137		GRINA	FAM110C	ZNF75A		FADS3	TNFSF12
1138		CCKBR	CASP8AP2	TP53BP1		LINC00671	PLSCR3
1139		CTAGE5	SNCA	CELF4		CANT1	VANGL1
1140		EI24	PPAPDC1B	FGF12		HLA-H	JUNB
1141		ARL15	SFMBT2	SOS1		ALAD	GBP2
1142		FOXRED2	TP53BP1	EIF2AK4		LRRC8A	LRRK1
1143		ADCK1	SNX27	LCOR		NMI	PTX3
1144		ABCC5	MKKS	QRICH1		RTKN	SIN3B
1145		MAP7	NRD1	SLITRK1		SMARCC1	ZNF503
1146		RAB29	RPGRIP1L	LOC100287592		SQRDL	GBP7
1147		TMUB1	GOLGA8A	MBNL1		FOXO3	OPCML
1148		CLCN5	RAB2B	NSMF		RNF24	COL6A5
1149		RAB9B	MLXIPL	CKMT2-AS1		DUSP23	DNLZ
1150		SLC25A33	HTR1F	CHD4		PPP1R13B	CAPZB
1151		C12orf73	AFTPH	SAMD3		PPAP2A	NTF3
1152		TCF25	BIRC6	REEP1		LAPTM4A	VIT
1153		SDF4	MARS	XRN1		MTMR12	SNX18
1154		HABP4	PUM1	UPF2		SLC35B2	RPS6
1155		EXTL3	NAAA	CHD7		ZDHHC3	TWIST1
1156		TMEM205	DNM1	PDHB		ELF1	CACHD1
1157		RAC3	ROCK1	ST5		ATP5G3	RILPL1
1158		TBC1D9	TSPYL2	N4BP2L2		ASS1	SNAP23
1159		REEP1	MBD1	STXBP1		CASP1	CASP12
1160		C19orf77	BCYRN1	STAT5B		MTMR11	PTMS
1161		SLC35D1	PTAR1	MAGEF1		CLN3	ILK
1162		PRKACA	SNAP91	FKBP5		PHLDA1	THBD
1163		PARD6A	BBX	CCDC117		PTPRH	GLT25D1
1164		MLXIPL	RERE	MLLT6		ZMYM6NB	CAMKK2
1165		ZNF814	UBXN4	ACE		GPC4	TPT1
1166		ZNF34	RIOK2	TTC37		SLC2A10	SIPA1
1167		CELF4	STX1A	LINC00998		CAP1	REM1
1168		FAM174A	PDXP	ANKRD52		KLHL5	BORCS8
1169		CMIP	ADAR	SPC25		TMEM254	RPL37A
1170		SNORA12	PTPRM	C15orf52		UBA7	RNF215
1171		CMC2	PTPN3	COL4A3BP		DYNLL1-AS1	DAGLB
1172		SPIRE2	GPR158	BSN		BLOC1S4	ADRA1B
1173		ERC1	LINC00473	MAVS		SNX6	RIT1
1174		EFCAB4A	CDC25B	BCL2L13		JUND	DENND2A
1175		GM2A	LYRM2	TECPR1		ME1	BMP4
1176		HMGN2	NNAT	TSPYL1		GALM	RSPO3
1177		CYB5R3	DCAF10	RGS7		DBNDD1	TSPAN5
1178		GNB2	SPIN4	NEMF		NR1H2	RRS1
1179		BCL11A	BHMT2	ATP2A2		UBAP1	TMEM43
1180		FDX1L	USP37	EDEM3		RBMS2	FUT11
1181		NPRL3	PRR34-AS1	MAP3K2		SLC20A1	MANF
1182		PRRC2A	MLH3	ZNF512		SLC20A2	UBE2S
1183		TSEN34	ATN1	PDXDC1		CHMP2B	BORCS7
1184		PITRM1	KIAA1731	CSRP1		C9orf152	FANCE
1185		TTC8	RPL13AP20	CRIPT		ARRDC1	ING1
1186		IDS	TLE2	SERINC1		OSGIN1	RPL19
1187		NUDT14	SMIM8	ZNF271		IGF2BP2	NMI
1188		C21orf119	MED14	SOS2		PPP1CA	TNFRSF1A
1189		POMT2	LACTB2	CALCOCO1		CPTP	BNC1
1190		FKBP5	ZDHHC21	SENP5		SCD5	FAIM2
1191		MRPL28	HNRNPA3	ALDH5A1		SPTAN1	HMGB1
1192		RGN	SYNJ2	TMEM263		MARC2	C17orf49
1193		POLR2I	TAOK1	N4BP2		CAMKK2	STARD5
1194		NIPSNAP3A	SUV420H1	ROBO1		CS	AIF1L
1195		C6orf48	NPAS3	CBX7		APEX1	EIF3I
1196		DHCR7	ZMYND11	HIST1H4C		RALGAPA2	SPOCK2
1197		CCDC158	THRA	SEC16A		TANK	GHR
1198		NKX2-2	PCGF5	CDK5RAP3		PNRC1	MATN4
1199		ABLIM2	RAB9B	TCEAL5		ELOVL5	SP100
1200		ZNF761	RBM25	MTMR3		CHKA	FAM32A
1201		ST3GAL3	CHUK	C1orf210		JUN	USE1
1202		ZNF275	RIPPLY2	RTN4		PNPLA2	NPR1
1203		ETFB	SEMA3E	FAM92A1		VTN	LYAR
1204		L1CAM	DNAJA2	MYCBP2		YWHAB	KSR1
1205		LINC00665	IKZF4	EVL		SERPINH1	PLXNA4
1206		IFT122	PGAP1	SLIRP		FGD3	USP50
1207		POMC	TGS1	TCEB3		MSMO1	CDH12
1208		LRFN3	SIK3	SPIN1		QARS
1209		GRAMD3	ZNF770	ZNF302		PGD
1210		ATP5G1	TDP2	DOK6		RASSF3
1211		MAP1LC3A	CLSTN1	CNKSR2		ORAI1
1212		LRBA	CYP27A1	GBF1		CEP70
1213		STON2	GTPBP10	PFDN5		HNRNPA0
1214		AP1G2	BEND5	KIAA1598		PRKCD
1215		ITM2B	LINC01091	WNT4		DBI
1216		PSEN2	CMAS	ZNF638		TMEM87B
1217		CDKN2A	RAB17	KCNMA1		PLEC
1218		IGIP	MPP2	MIEN1		MAP2K3
1219		NBAS	DKFZP434I0714	ZNF37A		ALDOA
1220		ZNF91	SCOC	ROR2		IL1R1
1221		HERC1	PCSK1N	NOVA1		PPAP2B
1222		POLR3GL	SERPINA1	LUC7L		LRRC16A
1223		TDRKH	SSTR5-AS1	ARL3		ARHGEF18
1224		CAMK2D	CACNA1D	SPG7		RBBP8
1225		USP18	TBX19	MTURN		HIP1R
1226		ZNHIT1	C16orf80	SLC36A4		GPR108
1227		DNER	ATP6V1C1	ACLY		FXYD1
1228		CDO1	EIF2AK2	GPATCH2L		CCDC64B
1229		R3HDM1	TSNAX	FBXW11		C6orf222
1230		NDUFA11	CASC2	MYO3A		LGALS8
1231		GYG2	WDR54	RSRP1		SH3D19
1232		RAB6B	CBX5	NHSL1		PRKX
1233		DEPTOR	CELSR3	MYL6B		SLC30A2
1234		CRYM	RGL1	NPLOC4		LYN
1235		MRPL41	ARPP19	SERPINB9		ECHDC1
1236		GNA12	ZBED5	CREBRF		PPP1R11
1237		TENM2	GNL1	GABARAP		DLD
1238		TMEM261	FAM172A	TMEM8B		MYC
1239		MTMR3	CTDSPL	RNF43		IFI27
1240		SLC25A43	AKTIP	MRPL33		DDX58
1241		KDELR1	GOPC	PRPF8		ATP13A3
1242		ERLEC1	DMXL1	HID1		CSRP1
1243		TMEM208	NONO	SYNJ2		IFFO2
1244		PDXDC2P	DMTF1	RQCD1		TFRC
1245		MAP3K4	EPRS	ATXN7		STARD7
1246		SNRPD2	ZMYM3	PWWP2A		PROCR
1247		SUOX	AASDHPPT	ATG13		IFITM10
1248		ARRB1	ATP1A3	LCORL		STAU1
1249		ZSCAN18	PTS	RALGDS		FAM107B
1250		LINC00473	TMEM245	MOAP1		TMEM127
1251		CYHR1	ZNF248	MCOLN1		TRAM1
1252		ATG4B	NDUFC2	KLHDC2		PTPRM
1253		ADAMTSL2	CYP20A1	CLHC1		SUCLG1
1254		APOA1BP	LOC101928891	SLC41A3		PAFAH2
1255		NMRAL1	C7orf73	BZRAP1		CXCL3
1256		ITM2C	TAF9	REEP3		ZHX2
1257		ZNF318	KIF16B	FAM155A		FERMT2
1258		PET100	PDCL3P4	INO80D		MLEC
1259		AIG1	PCED1B	MBTPS1		CAPN12
1260		RHPN1	GPS2	PHF2		CPT1A
1261		VPS41	DPYSL2	PLAC8		SRD5A3
1262		BTBD3	TMEM74B	ZNF814		HMGCS1
1263		PHF21B	MBP	KIAA1958		DNAJB1
1264		ACOT13	SEPT7	BHLHB9		EPS8L2
1265		TCEA2	ARG2	SRRM2		SLC27A1
1266		CCDC124	MAP3K13	SCAP		NRM
1267		PAXBP1-AS1	HSD17B10	SCARB1		TMEM165
1268		SLC4A10	ILF3-AS1	ZNF655		ZCCHC6
1269		EPT1	DCP1A	MAGI2-AS3		NPNT
1270		ABHD12	CYB5D2	OAZ1		ITGAV
1271		GMPPA	RAB11A	SLC16A12		METAP1
1272		CAMK2N2	COPRS	REV1		ACVR1B
1273		CERKL	BLOC1S6	INSM1		TPI1
1274		FCHSD1	CELF3	TGOLN2		FBXO3
1275		UQCR10	LYPLAL1	PPP1R16A		VASP
1276		CPN1	ZFAND5	REEP2		ACADS
1277		REEP3	SERINC1	CYLD		HNRNPF
1278		CMTM4	NRXN1	TOP2B		SERAC1
1279		R3HDM2	CHURC1	POLR2L		EPDR1
1280		CCSAP	JAKMIP1	SLC39A9		TEX264
1281		SCP2	SNAPC1	PAK3		IFI44
1282		PTPRJ	APBB3	PHIP		ABRACL
1283		DUSP8	KDM5A	KIFAP3		PPP4C
1284		FAM98C	SNHG8	LSAMP		TTC9
1285		LHFPL4	CHD9	SUOX		PAQR4
1286		IGSF21	PAXBP1-AS1	ASCC3		MFSD5
1287		BOLA3	PPP1CC	SCN3A		PARP12
1288		TTC13	NUPL1	RNPS1		CIB1
1289		MEF2A	CDH10	PDLIM4		TSPAN17
1290		BIRC6	SIK1	FSIP2		ARL6IP5
1291		SLC25A39	HLTF	PPM1A		AP1M2
1292		SLC16A9	NLGN1	LZTS3		SLC25A23
1293		CRTC1	TATDN3	ANKIB1		FAM63B
1294		PLP2	ZMYM4	RABGEF1		HBP1
1295		LOC646903	TMEM8B	ABHD2		FAM213B
1296		PITPNM2	SMPD1	KMT2E		CTSC
1297		DOCK3	NDN	OTOGL		HN1L
1298		EIF3J-AS1	FYN	ZHX3		KNOP1
1299		FAM174B	ALMS1	RGS11		CYFIP1
1300		SACS	RCAN2	H2AFY		PTAFR
1301		ARMCX1	ANKRD12	ZFC3H1		SLC25A5
1302		MAPK8IP1	RBAK	HELZ		IL10RB
1303		DISP2	SLC25A5-AS1	OBSL1		RAB5C
1304		DDC	TUBB2A	GRAMD1C		SPR
1305		FOXA2	FAM219B	CDK10		HDAC7
1306		SCAPER	C17orf75	AP1G2		NLRP2
1307		SWI5	ALPK3	ZBED8		PIGS
1308		NDUFS8	PAXBP1	TENC1		SLC19A2
1309		C3orf80	RANBP6	TMCO3		TM9SF1
1310		FAM71E1	ZDHHC8P1	KAT6A		SLC40A1
1311		TAOK2	DYNC2LI1	NFAT5		OSBPL9
1312		FBXW8	PNPLA8	ZNF674-AS1		PTMA
1313		MAPK8IP3	HMGN3	CTSF		NRBP1
1314		SOX13	MACF1	FUBP1		LUZP1
1315		NPC2	NPTN	SRSF5		NET1
1316		UBR4	LINS	CSRNP3		UBE2Z
1317		RNASEH2C	GSE1	R3HDM2		MOB1A
1318		USF2	RPL5	POMC		PAWR
1319		SSR1	CEP63	FAM168A		FAM83G
1320		TP53BP1	USP8	SNRNP27		SLC25A3
1321		MAGI2	LINC01014	ERCC6L2		SPATA13
1322		ISCA2	ZNF280B	ZNF667-AS1		PHGDH
1323		DPY30	DCAF16	MAGED1		FGGY
1324		HDAC6	SLC25A14	PHF21A		RAB10
1325		NAPB	SFRP1	BBS12		VPS26A
1326		SSR2	CADM2	MYO9A		BDKRB2
1327		C7orf13	C5orf51	SLC25A12		MTCL1
1328		TPST1	ZCRB1	ZKSCAN1		NF2
1329		SLC39A3	FAM195B	AP2B1		FPGS
1330		FAM50A	SNPH	SYT16		LRRFIP2
1331		TOMM6	KIF3A	KIAA0430		HCP5
1332		DXO	FAM155A	TNFRSF11A		SP140L
1333		GLS2	IBTK	DSTYK		SEMA7A
1334		ADAMTS18	FOCAD	RBM25		TMEM106B
1335		COX3	AASS	FOXJ3		CXorf38
1336		PMF1	NWD1	IDH1		ATP5O
1337		C17orf85	SYT7	FBXO11		TXN
1338		SRPK2	RSF1	SLC5A1		GSTO1
1339		LOC100130899	FNIP1	DHRS4-AS1		CAPZA1
1340		MED28	TTPAL	C3orf14		GSN
1341		ANKRD39	PILRB	DLEU1		ITPR3
1342		RBX1	TMCC2	FRS2		C9orf89
1343		AP1S1	UBE2N	EXOC7		ARHGAP18
1344		OTUB1	AMER3	KCTD7		TRIP10
1345		C9orf37	SMIM5	GIGYF2		NPY1R
1346		BIVM	RAP1GAP2	AP3D1		CYP4F11
1347		AP2A2	NFASC	CLU		LEPREL1
1348		CCDC184	PYGO2	SMARCA2		ANK3
1349		AK1	EXTL2	MARCH9		MAP3K8
1350		SMIM6	ORC3	MTG1		LAMA5
1351		MINOS1	MAPK13	OPRM1		TKT
1352		DIP2C	DNM1L	THAP7		ESRRA
1353		PDE6B	EIF4E	C21orf2		METTL7A
1354		DDB1	FBXO21	HCG18		TCP1
1355		NLRX1	SEC62	PHF3		RPN1
1356		PCDH20	TCEAL4	LOC101928891		MIDN
1357		PNMA8B	FAM8A1	BRD3		RNF213
1358		G6PC2	LINC00478	UTP14C		RPS6KA2
1359		ZSWIM8	HIST2H2BE	PPP4R4		KANK2
1360		FLVCR1-AS1	PPP1R9A	ZNF580		MED15
1361		C2orf74	EPS15	ZC3H6		HADHA
1362		LINC00526	SREK1	SPATC1L		STAMBP
1363		HEMK1	HERC1	GCNT1		LEPROT
1364		SREK1IP1	ENPP5	GFOD2		TMEM102
1365		VPS53	RANGRF	SH3KBP1		ARAP2
1366		HEPACAM2	HUWE1	PRPF39		UQCRC2
1367		AGA	ZNF441	TBC1D4		RASSF7
1368		CEP85L	CKAP5	IL6ST		ISG15
1369		PIGK	MED13	PTPRF		C1RL
1370		SESN1	TSPYL5	MAGI1		PRPS2
1371		AHSA2	TPRG1L	TCTA		MAGI1
1372		NDUFS6	TIAM1	IP6K1		FZD6
1373		WHSC1	SUOX	DDX46		ZDHHC16
1374		BCAR3	XPO1	GLRX		KLF11
1375		SLC2A4RG	PRRC2B	RICTOR		PCDH1
1376		ZCCHC11	C12orf23	ZNF106		SPSB3
1377		SNHG6	VHL	GBAS		TCF12
1378		U2AF1L4	SOWAHA	ZNF821		ZFP36
1379		PNISR	ZMYND8	SMDT1		XRCC5
1380		DDX24	GOLPH3L	MEF2D		STS
1381		CADM4	NSD1	PIGC		NRAS
1382		RGL3	RFK	FAM198B		BIK
1383		CAMTA1	FAM58A	ARSE		DNAJB11
1384		MYO10	PNPO	SGCE		MFSD10
1385		COG7	COL4A3BP	TMEM61		ADAMTS10
1386		SEZ6	RRM2B	GCC2		HDAC2
1387		LRRC29	ISCU	FBLN7		ADAM15
1388		PPP1R35	WHSC1	ME3		CTXN1
1389		TMEM8B	RNF114	SCAMP1-AS1		MYH14
1390		ASPSCR1	TRIP12	USP15		EPCAM
1391		TBCA	FAM213A	CALM1		PKP3
1392		FOXO1	HIAT1	CNTN1		AMOTL1
1393		MAPK15	DIS3L	NSF		CLDN12
1394		FAM178A	GABARAP	SEC62		TPPP3
1395		PFDN2	C6orf211	CTR9		RPN2
1396		RTTN	ANKH	DYNC1LI2		KIF13B
1397		SLC25A14	MAN1A1	MAP3K13		FRMD6
1398		GCK	TOMM7	LINC00674		PPP2R4
1399		FBXO41	CCDC14	ABI2		DIAPH1
1400		HRAS	RABGAP1	FAM222B		BNIP2
1401		MTSS1	SCN3A	SRSF6		GOT2
1402		HERC6	LOC284581	OFD1		IGSF8
1403		TECR	REC8	DCXR		KIAA1191
1404		SEC16A	USP24	RPH3AL		VDAC1
1405		CRIPAK	GBA2	KIAA1324		PEX13
1406		USP2	TBC1D5	DICER1		TFG
1407		MPP2	MRFAP1	CELSR2		FAIM
1408		NPHP4	SMG1	CTBP1		OAF
1409		CLPP	SLC33A1	RBM4B		CFL1
1410		SNHG15	AGPAT5	STAU2		WWP2
1411		RAVER2	COPS4	UBTF		ISYNA1
1412		TPK1	SUGP2	CMTM4		ZNF292
1413		TNKS	MAST3	TEF		SLC25A10
1414		PPL	AMN1	FAM188A		XPNPEP1
1415		AGFG2	ZNF638	TMEM201		LINC00342
1416		C12orf65	SCAPER	PLCB1		MX1
1417		GRIK5	KIAA0753	MAPRE2		TCF7L2
1418		CCDC28B	SCAF8	DCAF5		SAMD9L
1419		ASTN1	ARFIP1	TSC22D1		KIAA1551
1420		RINL	SS18L1	SF3B3		RALA
1421		GTF2H5	TCF4	UBA6		DNAJC15
1422		SPRYD4	LYRM1	NUDT16L1		IRF9
1423		GRSF1	RAP2A	CAMKK1		LNX2
1424		YBEY	GNAO1	PHC3		TSPAN1
1425		IRF2BP2	KANK1	PPFIA3		GIPC1
1426		ATP6V0D1	DCTN6	KDM5A		ALDH2
1427		HIST1H1E	WHSC1L1	NPNT		DNAL4
1428		CLEC11A	RAB3GAP1	GPR113		SMAD1
1429		PPT1	MFSD6	SYNRG		WBP2
1430		CHD2	CMTM8	HTATSF1		ARID5A
1431		FIBP	P4HTM	BTBD6		PDXK
1432		MAGEL2	DANCR	RGS17		LSG1
1433		ARPP19	USP51	DENND4A		TMBIM6
1434		ZFAND2B	OAT	CCDC57		TFDP2
1435		LSM2	CCDC113	ANKRD13A		FAM32A
1436		PLAC8	NCOA4	TBCB		ESRP2
1437		RPARP-AS1	PITPNC1	SSPN		MTUS1
1438		SNHG8	PPIG	TRIQK		TXNRD1
1439		VPS13A	GXYLT1	SPSB3		ZNF250
1440		MBD4	CPSF6	COPA		ERBB2IP
1441		USP9Y	NAT8L	DTNB		GAPDH
1442		ZRANB2	MANSC1	MAN2C1		EIF4G2
1443		MDH2	C1GALT1C1	ENPP1		TRIM26
1444		ARL6IP4	AHCYL1	UBXN7		GBAS
1445		TMED8	PIP4K2B	MED13L		ARHGAP27
1446		MCF2L	PGRMC2	CPT1C		ATP11B
1447		FAM122B	GPD2	KPNA5		IL6ST
1448		GOSR1	MAP7	ACBD3		MOSPD1
1449		VMA21	PIK3R3	CRYL1		PCBP1
1450		OGDHL	SLU7	IFI6		FAHD1
1451		ZSCAN30	NALCN	FASTK		MFGE8
1452		TGFBRAP1	KLHL12	PCIF1		TNFRSF19
1453		RAB11B	ASIC3	ANKZF1		GADD45A
1454		MOB3C	ECHDC2	ACTC1		ACO2
1455		MYO3A	DHCR24	PPME1		TMEM184C
1456		ATP6V1F	SDAD1	MCMBP		HTATIP2
1457		FAM104B	CPEB4	ZNF33A		CYB5A
1458		HOMEZ	SLC25A4	SORT1		CDK2
1459		SSU72	ERLEC1	CLTC		CDC42EP4
1460		SPG7	ARHGAP1	SIK3		AIM1
1461		UBR3	SCAMP5	TAF7		CCDC50
1462		DUSP28	RALGAPA1	REC8		PDLIM5
1463		NDN	C22orf32	GRIPAP1		EGLN1
1464		HHLA3	ZNF627	ARFRP1		XXYLT1
1465		LRRC73	ENPP2	KLF9		POC1B
1466		DPYSL2	TIA1	SNTG1		CTNND1
1467		PLEKHH3	SMIM11	ERCC6		PFKL
1468		LIMCH1	DNAJB5	DSTN		BCKDK
1469		ERO1LB	BBS9	LYST		RBMS3
1470		LDOC1	NUDCD1	LSM8		CDC42EP2
1471		PARK7	CCDC82	DDX24		ACTL6A
1472		LBH	ANKRD11	INADL		SIGIRR
1473		ZNF408	METTL9	DHX30		LOC644961
1474		FAM222A	ZC3H11A	FBXL5		PEA15
1475		GRIPAP1	SNX4	IRF2BP2		CERS2
1476		LINC00657	GLP1R	PLSCR4		PTPN9
1477		TMEM59	TMEM80	RHOT2		POLR2B
1478		ATP6V0E2	FAM91A1	C11orf31		SNAPIN
1479		FAM47E	GATC	CNP		SMC5
1480		NAT1	RIC3	NFE2L1		RASGRP3
1481		SENP7	SND1	GOLGA3		NKIRAS2
1482		ZNF692	MTMR6	ARHGAP29		ADAM17
1483		SIAE	MAGEF1	IPO9		ALPK1
1484		CALR	CEBPZ	HDGFRP3		BCL7A
1485		FBXW5	HSD17B7	ARGLU1		CRYZ
1486		TERF2IP	MED29	RBM33		PDIA4
1487		SGPL1	ZNF772	WDFY2		SLC35F6
1488		SMC4	METTL10	MGEA5		HLA-DMB
1489		PPP1R9A	CTCF	ATP6V1G1		MTMR14
1490		DICER1-AS1	CHN2	KMT2E-AS1		HNRNPK
1491		HS2ST1	PSMF1	ERO1LB		RAB5B
1492		SSBP2	RIMBP2	ARHGAP24		ATP5A1
1493		ABHD16A	SAP18	ADIPOR1		B2M
1494		TBCB	ACTL6B	CRYZ		EHD2
1495		TMEM25	VWA5B2	NT5C3A		TP53I11
1496		NHP2	EIF1AX	SGSM2		TMEM185B
1497		GLTSCR1L	RAB4A	SCRN1		AHCYL1
1498		FIS1	COMMD10	CES4A		LAP3
1499		CHCHD6	ERCC4	RBL2		GLO1
1500		C8B	CC2D1B	BACE1		NFKB2
1501		PROX1	TAF7	NFATC2		ETHE1
1502		DUSP26	GTF3C1	TRA2A		EFEMP2
1503		LIX1L	CHD1L	MUM1		TNFRSF11A
1504		PLA2G12A	FRA10AC1	ZMYND11		CYTH2
1505		CYP4F3	PISD	ZSCAN16-AS1		NIT2
1506		KMT2A	FBP1	ANKRD26		HSD17B4
1507		LPHN1	LOC100506710	R3HDM1		RASSF8
1508		LRRC41	TEF	TOPORS-AS1		MST1R
1509		C1orf210	DVL3	RBM39		PFN1
1510		TMEM131	PBX1	KANSL1		CHTF8
1511		LINC00667	MMRN1	MIA3		ANKRD13A
1512		NMNAT2	PNISR	MIER1		GMCL1
1513		IKZF4	KCNMA1	FAM127A		SEPT10
1514		SH3PXD2A	SMARCA5	ALOX12P2		NSUN7
1515		HDHD2	PRPSAP2	GSTA4		ZNFX1
1516		SLC40A1	SPOP	CEP164		GNAI3
1517		APTR	CLIC6	PRR34-AS1		FLII
1518		SETD5	NTNG1	VPS13C		PAK2
1519		LINC00493	MDH1	ABHD10		AHNAK2
1520		HSD17B10	TOLLIP	BHMT2		MRPL39
1521		KMT2E-AS1	FOXP1	BBS9		TMEM86A
1522		DTX3	UQCRB	LOC646719		PLEKHA1
1523		SOX6	SYNJ2BP	POLR2A		ACSL5
1524		CSTF3	SPEF2	ATRNL1		CTBP2
1525		NLGN2	EML6	NAA40		LPCAT2
1526		UBN1	ZBTB11	MICU2		CASZ1
1527		ZCCHC3	C2orf69	SUMO3		RAC1
1528		C16orf45	NUP133	SEMA4D		FDX1
1529		ATP13A2	TMEM209	FBXO3		IVNS1ABP
1530		YIPF6	FBXO3	DPP7		CDS1
1531		MAGED2	IPO9	HYDIN		MIF4GD
1532		USP27X	PARG	TIAL1		ARPC1B
1533		CNOT6L	BPTF	WASL		CLPTM1
1534		SIMC1	NCKAP1	INTS3		GPN1
1535		MSI1	PHF3	ABCF3		STT3B
1536		EYA3	EPB41L3	ZFAND5		ILK
1537		SLC25A20	CNP	SEPHS1		ZDHHC6
1538		JAK2	LOC100131257	KIF1B		SHB
1539		C8orf76	HINT3	PPP2R5B		RNF128
1540		COX16	TENC1	LRFN3		PSMA4
1541		FOS	ZDHHC2	HNRNPL		G6PD
1542		TMEM107	DGKB	ATG2A		OIP5-AS1
1543		AFG3L1P	FOXP4	SCOC		SPSB1
1544		CDKN2AIPNL	MPHOSPH8	HNF1A		RPS6KA1
1545		KCTD3	SAMD4B	SRP14		ERAP2
1546		GNAQ	DDX5	AFTPH		HLA-DRB6
1547		BPTF	UBE2B	FAM120A		OAS1
1548		WDR5	ABCD3	EIF2S3		SQSTM1
1549		SCAMP1	APIP	YY1AP1		INPP4B
1550		PRKAG2	HTATSF1	USP47		SMYD2
1551		ALKBH6	YLPM1	SSH2		PACSIN3
1552		AP1S2	ZRANB2	RPA3OS		ETFA
1553		PWARSN	LEPROT	ZNF133		DNMBP
1554		DHX30	HSD17B12	KPNA6		TLR5
1555		ALKBH7	C3orf62	CLSTN3		MRPS18A
1556		NDRG3	CAPZA2	RAD51-AS1		SPNS1
1557		LEPREL4	A1CF	FOXK1		CGNL1
1558		IFFO1	BCL2L2	PHKA2		RPS27L
1559		CNKSR3	SLCO5A1	CISD1		PDE7A
1560		PURA	NFAT5	NRCAM		TRIM25
1561		DDHD2	PCNX	PPIG		CCT2
1562		NCAPD3	EIF4G3	TTLL6		CMTM3
1563		CMTM6	ZFYVE16	CCDC12		SH3BGRL2
1564		WDR6	RNF103	CREB3L2		TRIM21
1565		HERC3	SEC16A	CEBPZOS		MMP24-AS1
1566		C1orf123	MRPS31	WLS		SGSH
1567		EBF4	HENMT1	SF1		DDX47
1568		MRPS26	TMEM44-AS1	ACAP2		MMP24
1569		CDC42BPA	ZNF776	MED16		METTL7B
1570		ANGEL1	MAP7D2	WNK3		GDPD5
1571		LUC7L3	NAV1	PTOV1		H1F0
1572		ATAD2	CFDP1	PJA2		LARP6
1573		ARF3	RALGDS	ROCK1		TTC39C
1574		NSD1	PAK1	KBTBD6		SRI
1575		IRS2	CCDC88A	FLCN		HDGF
1576		SC5D	SNHG10	ZC3H7A		DUSP22
1577		CCDC186	LOC646719	VPS72		PPFIBP1
1578		RNF144A	C6orf89	GRASP		MGST3
1579		PHLPP2	LOC643406	APOOL		ARHGEF16
1580		SLC2A6	SRP9	CDC42SE2		AGTRAP
1581		NR4A2	PPHLN1	OSBPL2		ADD3
1582		SUPT6H	CACNA2D2	MINOS1		SUMF1
1583		C1GALT1	RIN1	SETD5		PLEKHG6
1584		MARK1	PSMD10	ZNF292		PPP1R14B
1585		MATN2	PHF20L1	CCDC28A		IL1RAP
1586		SLC17A5	SPATA13	BCL2L2		RIT1
1587		LIG4	UBA6	PAIP2		PRRG4
1588		PSMB3	GHITM	BIRC6		C1QTNF1
1589		COX6B1	ERCC-00042	CPSF1		SERPINB1
1590		MED24	IRF2BPL	BAG6		EVA1C
1591		PPP4R4	FBXO8	ADCK3		NNMT
1592		JRK	GFOD1	LMO7		AGPAT3
1593		TEAD1	UBR3	CASC4		C6orf132
1594		LAMTOR5	STK33	C18orf42		HIP1
1595		NME1	UBR5	TXLNA		RIC8B
1596		EFCAB2	CNOT7	C11orf49		ARMC10
1597		PNMA2	ASCC3	RGN		MARVELD3
1598		MORN4	ZNF317	ARID1B		VPS35
1599		ZDHHC17	ING2	TLK1		DHCR7
1600		C19orf81	CMTM4	MSI1		FBXO21
1601		TXNDC15	SEC23B	TMCC3		GABRE
1602		NHLRC1	TMCC1	XPA		DNM2
1603		SQLE	C7orf55	GCFC2		LAMB1
1604		ZNF821	TRIM33	C5orf24		BARD1
1605		LOC730101	SAMD8	XRCC1		ST3GAL4
1606		GALNS	EFCAB14	KLC1		YES1
1607		ATP2A2	SULF2	EZR		MAN2B1
1608		RPAIN	GFOD2	MIA2		NR6A1
1609		C11orf71	SLC36A4	TMEM14A		APOBEC3B
1610		RPS15	MAP3K7	ALDH9A1		RGMA
1611		TXNDC12	GFM1	PUF60		GSDMD
1612		RPA3	EIF3L	POLR3GL		ARNTL2
1613		SPATA7	MORF4L2	GNL3L		MYO5C
1614		CTSZ	SSBP4	RNF207		LRRC8E
1615		ABCA2	ORAI2	DANCR		NDUFS1
1616		ICA1L	FBL	GCN1L1		GINM1
1617		OST4	DHRS4-AS1	MYEF2		TUBA1A
1618		GYG1	CLN5	SUGT1		RFWD2
1619		CEP63	PCMTD2	PIPOX		TMEM87A
1620		TICAM1	LINC00476	ATP5I		RUNX1
1621		ARHGEF9	SNHG9	DENND4B		KLC3
1622		ZDBF2	TAPT1	ALCAM		RAI14
1623		ZNF585B	CIR1	CNBP		FZD5
1624		LINC-PINT	MLLT10	H1FX		PPDPF
1625		C11orf31	ATP8A1	PAGR1		PLEKHA7
1626		CCDC107	SLIRP	TMEM45B		RAF1
1627		ZNF580	KIAA0895	ZMYM3		SDHC
1628		RPL8	NDUFAB1	NAA38		IFT57
1629		HINT1	ARCN1	UCKL1		DSCR3
1630		SRSF12	NGFRAP1	CALM2		FMO5
1631		LRRC23	TRAPPC8	NAPA		FNDC3B
1632		ATP6V1B2	TCTA	CRYBB2P1		DHX15
1633		COX14	GRAMD3	FLYWCH1		CBLC
1634		HIVEP3	CPT1C	TRIP11		PPARD
1635		CELF6	BBS4	EFCAB14		UBC
1636		C7orf55	REPIN1	ZNF780B		VEZT
1637		CRY2	THOC2	UBR3		BZW1
1638		HIST1H1C	CAND1	DYRK1B		PHB
1639		CEP164	SENP5	BAD		NNT
1640		CHMP2A	KIAA0232	NAP1L1		JOSD1
1641		ICA1	TOMM5	CACNA1B		GBP1
1642		HSBP1	FLJ31306	SNX17		UBE2L6
1643		HSPE1	HSPH1	ARL16		GGT7
1644		HSD17B12	RSL24D1	C10orf32		EMC3
1645		LOC284889	ARHGAP5-AS1	KIAA0368		DCAF12
1646		ZMYM3	SPIN1	PUM1		FAM149A
1647		DAP	SPIRE2	LIN7B		LCP1
1648		LUC7L	LARP1	PRMT2		CYP2J2
1649		PGP	LYSMD3	WDR34		SRSF4
1650		MAP4K2	ANKRD17	TAF9B		EIF6
1651		RNF8	MBD6	LOC101928062		PEX11A
1652		LOC645513	ATP5EP2	PTPN23		CBR1
1653		PRMT1	C16orf45	SLC7A1		PNKD
1654		TCTN1	CCDC108	BCLAF1		NQO1
1655		CACFD1	HOOK2	ITGAV		CREG1
1656		ATP6V1G1	PPP1R12B	NCBP1		P2RX4
1657		ACD	MSH3	GGA1		ECI1
1658		LOC643355	MRPL42	SH3BP5-AS1		STXBP2
1659		PIK3C2B	UBA2	ZRANB2		UBE2I
1660		SDK1	PRPF4B	PLEKHM3		CHST15
1661		MED25	KCNAB2	BCAM		NT5C2
1662		TUBG1	KAT7	TFEB		AGPAT2
1663		BICD1	GNPDA1	SNX2		HMG20B
1664		RPRD2	EYA3	HDAC1		FLNB
1665		GDAP1	DSCAM	PPM1K		UBE2D1
1666		CPNE1	HIPK2	SCP2		AKAP1
1667		WDFY3	MRPL33	GNB5		SLC1A5
1668		HMGCLL1	C2orf15	FAM178A		ALDH7A1
1669		KIAA1147	CNOT10	CLEC11A		YTHDF2
1670		PIP4K2B	CREBZF	SMARCE1		CNIH4
1671		TMEM38A	YARS	IFT74		WTAP
1672		FAM169A	TXLNG	ASPHD1		SGPP1
1673		NDUFAB1	TOP2B	LHPP		SLC38A7
1674		LENG1	ZC3H14	CAMLG		SERTAD2
1675		NECAP1	VPS37C	PCNXL3		SNX7
1676		KCNJ11	ULK3	SSBP4		TNFSF15
1677		UBE2S	CACYBP	PPP1CC		DCBLD2
1678		SELT	SLC26A2	PHPT1		SNX33
1679		STARD13	ARMCX4	DACH2		EGLN3
1680		DOHH	CDH22	STXBP5L		ZNF28
1681		CD36	SH3BGRL2	PBX1		SMPDL3B
1682		ODF2L	ZNF84	ZC3H14		BTBD7
1683		TTC37	MYL6B	CIR1		NUP93
1684		ZNF518A	ATXN7L3B	SYNPO		INADL
1685		POLR2E	TERF1	NECAP1		ZBTB43
1686		VPS13C	ANGEL2	TCTN2		PGM2
1687		CENPV	GSPT2	SORBS2		AFAP1
1688		ARMCX4	BZRAP1	CUL4B		POLDIP2
1689		THRA	TSHZ1	EPC1		CYP4V2
1690		SLC4A8	HELZ	CECR1		C6orf62
1691		MTSS1L	CLCN3	BCL7B		SPRY2
1692		C9orf142	RNF11	C4orf3		PSME3
1693		CCDC106	ZFP106	CCP110		SLC38A2
1694		USMG5	GABARAPL2	CLSTN1		ANPEP
1695		GLB1L2	PHIP	C16orf62		MFSD7
1696		TIAL1	DHX36	UBAP2L		UNC93B1
1697		PTPLAD1	RORA	PROS1		TXNDC17
1698		TTC7B	C1orf114	NGFRAP1		ARHGEF2
1699		BEX4	RAB8B	THYN1		FAM110C
1700		BAHD1	LRRC8D	ZC3H15		FAM102A
1701		STK4	LOC100287592	RINL		EGOT
1702		ATAD3C	GTF2A2	SOBP		CHMP1B
1703		RPS6KL1	PNN	KIAA2022		NCK1
1704		SIVA1	NLK	PRRT2		PXYLP1
1705		TESK1	TRPM3	TSPAN12		MVB12A
1706		ST7	PTPRU	NRD1		GPRC5C
1707		CISD3	DNAH14	KRIT1		MRPL37
1708		ASH1L	CARKD	ARFGAP1		GALNT2
1709		MRPL23	LINC00667	BEX2		TUFM
1710		SZT2	LOC100289230	EDIL3		PLRG1
1711		PTS	MSL2	SRSF10		MPC1
1712		WDR61	NPTX2	MPHOSPH10		ARPC2
1713		FGD1	TGFBR1	CCDC186		WBP1L
1714		KIF13A	ANKIB1	GABBR1		PPA1
1715		NELFE	SGSM2	TCF4		PPP1R18
1716		FAM20C	C11orf49	LINC00667		IDE
1717		NDUFA2	UBE2V2	HNRNPDL		FRK
1718		RAB1B	RBM38	LMBRD1		LBR
1719		FASTK	TMEM68	BNIP3L		TMEM171
1720		NEIL1	CISD1	ARAP1		MT1F
1721		PDE8B	NHP2L1	ZNF518A		PGAP2
1722		RPS10	CEACAM19	RYBP		ARHGEF38
1723		SNRPF	CTAGE5	C10orf11		BROX
1724		GPR180	PPIP5K2	TRAF3IP2		SULT1A1
1725		UBAP2	MYEF2	TPP1		RASSF4
1726		CACNA1B	ANKRD36	KTN1		HOMER3
1727		MAP7D3	KLHDC3	LRRC58		TLR2
1728		ATXN7L1	H2AFY	SENP7		LRCH4
1729		PCID2	LRRTM4	BRD2		PDGFA
1730		LRRTM2	WRN	ARFGEF2		KIRREL
1731		ND4	ANKHD1	POMT1		CA9
1732		ZFYVE27	MIA3	ATP6V0C		CCDC47
1733		TCEAL4	PDE11A	PTPN3		BMP4
1734		ZHX1	MARCH6	LOC100128398		PAIP1
1735		TRAPPC1	PRR14L	MRPS26		SHISA5
1736		ZNF781	KRIT1	AHSA2		SMIM15
1737		INAFM1	MGC21881	A1CF		AIFM2
1738		TET2	C5orf63	NELFCD		MCCC2
1739		TMA7	SMAD5	TCTN1		CHST3
1740		PITHD1	ZMYM2	SMG1		MAP1LC3B
1741		MRPL57	TCEA1	PLS1		LANCL1
1742		TMEM132D	EIF1B	PQLC2		FAM117B
1743		TCTEX1D2	ZFP62	NONO		R3HDM4
1744		UNC119	NBR1	KDM5C		IGSF9
1745		RALGDS	PPP2CB	WIPI2		ABTB2
1746		CRIP3	SGCE	UBE4B		AFMID
1747		C21orf2	TYW3	ANKRD13D		MRPL44
1748		SUCO	SOBP	POLK		LGALS3BP
1749		B4GALT6	IL13RA1	ANGPTL1		UCHL3
1750		UCKL1	ARMC1	GAK		GATAD2A
1751		ACAP3	ZNF302	PPM1G		USP53
1752		CXXC4	COIL	GNB1		EIF3I
1753		INSM1	STX17	SH3GLB2		ATP2B4
1754		RPS3A	WDR6	RC3H1		CDC42
1755		GPBP1	CCAR1	SETBP1		CLPX
1756		ZNF93	L1CAM	PPWD1		MIR4435-1HG
1757		ABCD3	HNRNPD	CERS6		FH
1758		RUNX1T1	MIS12	FXYD6		RBM17
1759		GSAP	DDX24	BEX1		RASAL2
1760		SNRNP25	MAL2	SYNJ2BP		DAPK1
1761		WDR60	ANKFY1	AFF4		GPRIN2
1762		PIGP	WDR82	RAI2		HGSNAT
1763		FAM120C	PRKAR2B	ENPP4		PPP2R5E
1764		IRF2BP1	C11orf58	FAM208A		LATS2
1765		S100B	SAMD12	PVRL1		PTPN12
1766		DPH6	ASRGL1	SUV420H1		FMO2
1767		DENND4C	KIAA0586	FLOT1		SPG21
1768		UQCRQ	FAM174A	YIPF6		RBM3
1769		KANK1	CACNA1C	HNRNPM		TM9SF3
1770		ZNF428	ARIH2	HIPK1		TROVE2
1771		WBP11	CTR9	SMARCA1		CAPS
1772		NBPF1	CDKN2A	C17orf100		COX7B
1773		COX6C	PSMC2	STAT2		METTL17
1774		KIAA1279	RRAGD	VPS51		STK3
1775		TMEM216	CCDC90B	LTBR		ALDH1A2
1776		NEDD8	VWA8	RASGEF1A		VEPH1
1777		CDS2	RPL3	NRDE2		TBC1D8
1778		ZFP36	FARSA	ESRRG		PPM1B
1779		HLTF	MLL5	RNF167		GCKR
1780		PSMB6	PEX11B	KIAA1731		AMFR
1781		SPSB2	TSR2	KIDINS220		FAAH
1782		ARGLU1	LRRC37BP1	RNASEH2C		NTAN1
1783		NDUFB7	TRRAP	AHDC1		LARGE
1784		ND3	DDR1	C21orf119		KANSL3
1785		TCERG1	FYCO1	TMEM164		WWP1
1786		PAPOLA	RHBDD2	RBFOX2		PHACTR4
1787		PEG10	C22orf28	TMEM176A		GHITM
1788		BID	TMEM50B	NCSTN		C15orf39
1789		FRS2	SYT5	DCAKD		FGF2
1790		SERP2	CCDC30	NRSN2		TM2D2
1791		BAZ2A	FBXO11	CHRNB2		TIMM17A
1792		ERGIC3	SOCS4	MAP1LC3A		MICALL1
1793		ATP5IF1	SLC26A11	ICMT		TOB1
1794		C7orf43	MZF1	LINC01146		SLC37A3
1795		PPIG	MAPK8IP1	P4HTM		ACBD5
1796		ECE2	MATR3	CMIP		SNHG18
1797		PRKAR1A	SRSF1	FAM13C		GRB10
1798		YWHAE	GTF3A	CBFA2T2		PRMT5
1799		LRP3	DNAJA4	CPEB4		ADPRHL2
1800		NIPA1	POGK	CRCP		CCT6A
1801		ECHDC2	ARFGEF2	LINC01278		CCNC
1802		ATP5MC2	BBS1	CEACAM19		PAK1
1803		CCDC12	ANP32B	TMX4		TRIM32
1804		RPS6KA6	ZNF706	CKB		SCAF11
1805		ZNF473	JKAMP	BAZ2A		HNF4G
1806		NUDT16L1	ZNF275	BRK1		RNF103
1807		ATXN10	ACADSB	MLF2		CNFN
1808		OSBPL10	AFF4	RAB3GAP1		IGF2R
1809		NDUFV3	ERCC-00136	LOC100507577		GMPR2
1810		AAK1	AKAP9	DCAF8		ELAVL1
1811		GBF1	SC5DL	CELF1		SLC35A4
1812		LSM6	MAP2K4	TCEAL3		PPA2
1813		BAX	KIAA1147	DPH1		HSBP1L1
1814		PART1	DNAJC18	MACF1		SEC14L2
1815		SURF2	IPO7	WDR13		RMDN3
1816		RPL32P3	SON	FBXO21		OPTN
1817		PRKD1	TRIM4	WFS1		SGPL1
1818		PLAG1	STON2	ACVR1C		ANKRD50
1819		RASGEF1A	LOC401397	ZNF620		EXT2
1820		RPS19BP1	USH1C	MRPL57		PMPCB
1821		MEAF6	DCUN1D2	NAP1L5		NDUFA9
1822		HIPK3	SUZ12	ZZZ3		VTA1
1823		NEURL4	SARS	COMTD1		SORT1
1824		GPHN	USP16	ATG16L2		SYNPO
1825		ASCC3	APPBP2	GDAP1		SLCO4A1
1826		DNAJC6	TARS	KIF5C		MDH1
1827		NELFCD	IFT74	SIN3A		RAB8A
1828		RBM34	TBL1XR1	CMC2		PIK3R1
1829		PHF1	LHFPL4	KIF5A		TNIP2
1830		TAPT1	SSBP2	GLIS3		DLG3
1831		RAD23A	KIAA1715	RPRD2		SLC15A2
1832		RBM10	TATDN2	PTPRG		HNRNPAB
1833		PRR14L	RBMXL1	RBM4		RTF1
1834		AP2S1	CHN1	MNAT1		C12orf75
1835		TMEM200A	ANAPC16	ADRBK1		ERGIC3
1836		ZNF430	YWHAG	LFNG		HIATL1
1837		ZC3H6	GARS	EFHC1		PRELID2
1838		HLA-H	LPXN	CDK5R1		SLC35C1
1839		SNRPG	MBOAT2	ARSA		TBC1D10A
1840		SLC16A10	ZBTB6	ZNF91		PARP14
1841		PTK2	TP53INP2	ZNF264		SMURF2
1842		KIAA2026	LINC00674	SMIM22		NPEPPS
1843		TRIM9	INPP5F	SYF2		RNF4
1844		UBE2K	PIGM	ANKRD17		SMARCD2
1845		ALAS1	C15orf61	VEZT		SH3RF1
1846		C11orf70	TCTN1	RAB12		GGCX
1847		RYBP	MAP2K1	BRAT1		RB1CC1
1848		POLR2J	FMR1	FKRP		SLC9A1
1849		YY1AP1	SRPRB	ZFR		DPCD
1850		C14orf101	TTC25	LARP1		ARHGAP17
1851		C12orf76	APH1B	MTMR7		SDC3
1852		SULT4A1	GLTSCR1L	BRD1		LYPLA1
1853		PPP3CA	DUT	C11orf58		NADSYN1
1854		AACS	HDAC1	DYNC1H1		RAP1GAP
1855		DLG4	C1D	FBXW5		OSER1
1856		POLR2C	CSTF3	STMN1		IL13RA1
1857		C6orf226	IMPACT	THOC2		CHCHD10
1858		PICK1	DSP	LRRC75A-AS1		TNPO3
1859		KDF1	HSP90AA1	UGDH		BCAP31
1860		RBM5	NDUFB1	SRRM3		TLR1
1861		NKIRAS1	SELM	HLTF		RDH13
1862		DEDD2	ATP5L	ARPP19		TICAM1
1863		ESRRG	CANX	RBMX		SDHB
1864		SEC24C	SNX3	OGDHL		GLRX3
1865		C12orf57	SCIN	KIAA0586		HIBADH
1866		HELZ	UBE3A	ASAP1		CCBL2
1867		GSE1	SAMD9	RBM10		PPP4R1
1868		EMC7	SYNRG	IRF2BP1		PIGO
1869		DCAF11	CNOT1	LINC00657		ZNF672
1870		SSBP3	DGKZ	TCEAL4		CYC1
1871		GCNT2	CDK5R1	PPIP5K2		LINC00963
1872		HSPA1A	IFIT5	PTK7		VDAC2
1873		GPS1	TADA2B	ZFAND2B		PPM1G
1874		EIF4E3	TRAF3	WSB1		CDR2
1875		COX2	SGSM3	CAMTA2		PSMB7
1876		SMARCB1	SMARCA1	PLEC		SLC30A1
1877		EIF1B	CMIP	CHD8		PYGB
1878		LOC646719	DROSHA	FAM20C		ZNF267
1879		LINC00467	RNF220	TUBGCP6		LEPROTL1
1880		SRPR	DENR	MZF1		MMD
1881		ATM	NUP98	METTL17		NR2F2
1882		NAP1L3	CCDC92	DNM3		FOSB
1883		MRPS33	WBP2	ZNF785		MRPL13
1884		SRA1	C10orf11	OTUB1		BRE
1885		MYEF2	RB1CC1	SNORD10		TBC1D22B
1886		MYL6	NUP62	TTC3P1		TMEM125
1887		LINC00263	PRKXP1	YPEL5		TIPARP
1888		MRPL40	MORF4L1	GFPT1		ACOX1
1889		C1orf35	RLIM	LINC00959		SZRD1
1890		SLC39A13	VPS45	NEGR1		GLIPR1
1891		HN1L	SACM1L	AUP1		BTN3A2
1892		CXorf40A	NME5	KCTD13		NDUFA6
1893		APOO	LIN54	SRRM1		GRTP1
1894		FAN1	RABL3	CLCN3		PPCS
1895		SNRNP70	C19orf73	PPP6R1		TCTN3
1896		KIAA2013	JAZF1	CCDC50		NBR1
1897		NAT9	ERCC-00108	UBQLN2		JUNB
1898		DOPEY1	ICA1	ZNF587		MUL1
1899		SPAG7	C2orf74	LINC01089		BPHL
1900		MCEE	ZHX3	GOSR1		INF2
1901		COX11	ZNF252P	DDX5		FGD5-AS1
1902		SMIM7	RPS26P11	PALM		NRIP1
1903		NGRN	HNRNPR	NKIRAS1		AGT
1904		RAD1	CSRNP3	PTPRS		KIAA0754
1905		BNIP1	USP22	LYSMD2		PPP2CA
1906		CTBP1	SLC25A27	KDM2A		MAEA
1907		AKAP9	TMEM205	NDUFB1		C5orf22
1908		NFU1	ZBTB18	GPS2		DUSP10
1909		PPARA	DMXL2	PLXNB3		THAP9-AS1
1910		GNAI2	ATP6V1E1	LINC01314		ING4
1911		TSPYL5	PTK7	CAPS		HMGCL
1912		ZNF585A	PPP1R15B	ARFGAP2		CLTA
1913		JTB	ARID4B	SAMD12		M6PR
1914		GOLGA3	NCOA7	RPS6KB2		CDK16
1915		MSL1	CAMK2N1	SAMD4B		UBA3
1916		SMYD3	C14orf142	DNAH14		MTHFD1
1917		MTCH1	KIAA1430	SNHG7		SLC37A1
1918		RASSF4	TSPAN5	CDC42BPB		BZW2
1919		MRPL9	ACAP2	STX2		FBXW9
1920		ZNF512B	SCARB2	SERP2		PPP2R1A
1921		FOSB	OFD1	MARK3		HMGN1
1922		YTHDC1	ARL8B	ICA1L		UQCRFS1
1923		BDP1	CETN2	C16orf13		SLC8B1
1924		ZNF451	SCFD1	LARP7		PPP2R5D
1925		ARF5	SETD2	CLGN		CYB5B
1926		GPR37	LRRC34	LOC202181		NMB
1927		ARHGEF28	SLC41A3	MESDC2		FAM134B
1928		N4BP2	ZHX2	FKBP3		PLCD3
1929		PTGR2	TOPORS	FAM69A		CACNB3
1930		PCGF5	KPNA6	ARL8B		SIGMAR1
1931		DMD	FOXP2	SEC31A		AP1S3
1932		YTHDC2	NOL10	B3GNT8		PLEKHA5
1933		PSMD8	MRPL20	CFDP1		PTBP1
1934		CACNA1D	AOX1	RBP1		C20orf24
1935		PKM	ACVR2A	SLC17A5		USP3
1936		ZDHHC8P1	LNPEP	C17orf85		ADSS
1937		TMEM196	NSL1	MIR5047		SERPINB9
1938		MRPS21	RBBP5	SAP18		HGD
1939		DFNB31	ZNF853	HNRNPA2B1		NUTF2
1940		CISD1	YPEL2	CNOT11		SRPK1
1941		HNRNPA3	RAB3IP	HDAC9		GTF2B
1942		ABCA5	SMC1A	PDCD6		FTH1
1943		NDUFB9	MRFAP1L1	DCTN1		TRAK2
1944		TRAPPC2L	GOLGB1	THAP4		PRKAA1
1945		ELFN2	LRCH4	BLOC1S6		KIAA0319L
1946		SEC61A2	WDR5B	USP33		MOCS1
1947		SEPT7P2	NCALD	DHX40		ACTN1
1948		MTHFS.1	MINA	C7orf50		NT5C
1949		RASSF5	BACE1	MPHOSPH8		SLMAP
1950		CHD8	CPEB3	SLC25A4		ZNF883
1951		MAGOHB	NF1	PHGR1		HECTD3
1952		CABIN1	YME1L1	CYP46A1		FNTA
1953		CD55	FAM199X	SOX5		SESTD1
1954		NDUFB6	PPP6C	NEIL1		NSDHL
1955		STXBP4	TM2D3	CCDC23		C5orf15
1956		HINT2	TRIM68	UBA1		FCGBP
1957		EXOSC8	USP7	KIAA1244		CREB3
1958		TNPO2	ISCA1	LSS		ZDHHC13
1959		FBXO44	NUDT21	C6orf89		ADAM33
1960		H2AFY2	SNRNP27	CUL9		BICD2
1961		GABARAP	CDC73	FAM134C		EPHX1
1962		ZNF441	FAM115A	TOB1		PSME1
1963		KLHL15	SLC35A5	CHD2		ZDHHC9
1964		SLIRP	UBE2L6	PCED1A		TNFRSF1A
1965		CCDC92	ZC3H12C	SF3B1		WDR55
1966		ATCAY	BCL9	C6orf48		TMEM179B
1967		NBEA	PSD	SAMD8		USF1
1968		LRRC36	ADD1	SRRT		TRUB2
1969		ATP6V1E1	DLL4	USP8		BOK
1970		USP7	GNAZ	PTEN		ACSM3
1971		GTF3C6	AIDA	IMPA1		PSMA7
1972		ACP1	RGMB	FAM229B		COMMD7
1973		DDX17	ZNF345	C6orf1		MRRF
1974		AP1B1	TCF20	XIAP		COMMD2
1975		RCN3	RPL19P12	RAB1B		DDX3X
1976		DNM1L	CDC16	ZBTB38		EIF3M
1977		ZNF789	ATP9A	REXO2		B3GNT2
1978		SMARCA4	KCNC2	DGUOK		OXA1L
1979		SFXN1	TMEM25	TM9SF3		ATIC
1980		FKBP7	GPR180	HNRNPD		CHMP4A
1981		TOMM5	POGZ	COA3		AUTS2
1982		ATN1	MTMR3	TOMM7		SF3B4
1983		AHDC1	TBK1	LINC00883		HGS
1984		FRA10AC1	PPFIA1	SREK1IP1		HHLA2
1985		STIP1	NRIP1	CACNB2		AFG3L2
1986		ANKRD26	CLDN9	NAP1L4		TSG101
1987		HIGD2A	IWS1	TAOK1		MLLT3
1988		SLC16A11	CERK	CNOT7		SLC25A29
1989		MYO9A	RNPS1	ZNF772		PML
1990		IVNS1ABP	PRICKLE1	BEX5		C1QBP
1991		TULP4	FBXO33	SOAT1		RHBDL2
1992		PNMA1	ZNF471	AGFG2		SIPA1
1993		LOC283335	PARN	FBLL1		SDR42E1
1994		REM2	PCNXL4	ATG9A		NDUFA10
1995		RAB40C	CCDC53	FAM177A1		TIMP2
1996		REV3L	SNX17	IMPAD1		ASL
1997		CPEB3	SMAD2	MAPK1IP1L		SELENBP1
1998		TECPR1	FBXO7	YWHAE		TRAP1
[truncated: 5,044 more rows]

## Sheet: Supplementary Table 3
Supplementary Table 3. Mouse embryonic pancreas 10x single-cell RNA-seq clustering using Conos (data integrated from E12.5, E13.5, E14.5 and E17.5 embryonic samples, and with cells of the Procr+ cell cluster retrieved from Wang et al. adult pancreatic islets). Cell cluster markers (adj. P-value<0.05) ranked by Average log2 fold change.
	Cluster
Marker #	1	2	3	4	5	6	7	8	9	10	11	12	13	14	15	16	17	18	19	20	21
1	Itm2a	Dcn	Spp1	Serpina6	Gcg	Spp1	Ctrb1	Ins1	Apoe	Igfbp2	S100a8	Neurog3	Gap43	Hist1h2ap	Hba-a1	Fabp4	Ghrl	Try4	Peg3	Hba-a1	Hbb-bt
2	Gsn	Upk3b	Clu	Cpa2	Ppy	Wfdc2	Cela3b	Ins2	Pf4	S100a6	Cd74	Gadd45a	Fabp7	Top2a	Hbb-bt	Plvap	Serpina6	Prss2	Cdkn1c	Hbb-bs	Hbb-bs
3	Ptn	S100a6	Tmem45a	Cpa1	Pyy	Cyr61	Pnliprp1	Iapp	C1qb	Upk3b	S100a9	Cck	Tuba1a	Itm2a	Hbb-bs	Igfbp7	Cpa2	2210010C04Rik	Hmga2	Hbb-bt	Hba-a1
4	Rpl29	Rarres2	Krt18	Pnliprp1	Sst	Hmgb2	Rnase1	Npy	C1qc	2810417H13Rik	Cma1	Btbd17	Dpysl3	Hmgb2	Hba-a2	Gng11	Cpa1	Pnlip	Sox4	Hba-a2	Hba-a2
5	Acta2	Igfbp6	Lurap1l	Nupr1	Ghrl	Ube2c	Clps	Nnat	Fcer1g	H2afx	Cpa3	Igfbpl1	Stmn2	Mest	Hba-x	Egfl7	Ttr	Ctrl	Cldn6	Ghrl	Ccl4
6	Tshz2	Igfbp5	Cldn3	Tmem97	Pcsk1n	Cldn3	Gm42418	Chga	C1qa	Birc5	H2-Aa	Cdkn1a	Tubb3	2810417H13Rik	Alas2	Cldn5	Gcg	Cela1	Adamts1	Alas2	Alas2
7	Plagl1	Crip1	Atp1b1	Serpini2	Rbp4	Sox9	Cela2a	Ppp1r1a	Lyz2	Prkcdbp	H2-Ab1	Hes6	Tlx2	Rpl29	Car2	Emcn	Cck	Sycn	Sox9	Chgb	Pf4
8	Sparcl1	Sparc	Bicc1	Ptf1a	Ttr	2810417H13Rik	Cpa1	Scg2	Tyrobp	Dcn	Ltb	Nkx2-2	Rtn1	Cenpf	Snca	Ramp2	Rbp4	Ctrc	Igfbp5	Slc38a5	C1qa
9	Tgfbi	Cav1	Sox9	Reep5	Slc38a5	Krt8	Spink1	Scg5	Lgmn	Cav1	Cd52	Ttll6	Phox2b	Sparcl1	Hbb-bh1	Esam	Pnliprp1	Reg1	Wfdc2	Mkrn1	C1qc
10	Mest	Col3a1	Dbi	Gstm1	Resp18	Atp1b1	Cpb1	Scg3	Sepp1	Tuba1b	Lyz2	Pax4	Id3	Plagl1	Mkrn1	Pecam1	Slc38a5	Zg16	Bex1	Snca	C1qb
11	Cdkn1c	Bst2	Gsta3	Gcat	Chgb	Epcam	Reep5	Cpe	Ctsb	Igfbp5	H2-Eb1	Tubb3	Phox2a	Tshz2	Fech	Ctla2a	Cdkn1a	Try5	6330403K07Rik	Cpe	Apoe
12	Col1a2	Prkcdbp	Tinagl1	Gc	Pcsk2	Cdk1	Cpa2	Ero1lb	Dab2	Lgals1	Srgn	Krt7	Ednrb	Cenpa	Gypa	Ly6c1	Gast	Cela2a	Rprm	Rbp4	Lyz2
13	Mfap2	Dmkn	Mt2	Gamt	Tmem27	Gsta3	Fkbp11	G6pc2	Ms4a6c	Ube2c	Rac2	Mpc1	Uchl1	Birc5	Blvrb	Eng	Chgb	Pla2g1b	1700011H14Rik	1700086L19Rik	Lgmn
14	Cald1	Krt19	Mgst1	Vtn	Chga	Cym	Cel	Pcsk2	Tmsb4x	Sparc	Coro1a	Gadd45g	Plp1	Cks2	Slc25a37	Crip2	Nupr1	Cpb1	Sfrp1	Iapp	Fcer1g
15	Mfap4	Lgals1	Pdzk1ip1	Hspd1	Scg5	Cks2	Nupr1	Pcsk1n	F13a1	Cenpf	Lgals3	Rph3al	Ascl1	Nusap1	Bpgm	Mest	Neurog3	Clps	Ptov1	Fech	Ccl3
16	Col1a1	Hspb1	Cyr61	Lyar	Gpx3	Top2a	Serpina6	Prss53	Ctss	Cks2	Arhgdib	Stard10	Stmn3	Ube2c	Nudt4	Ecscr	Pyy	Cela3b	Acot1	Chga	Dab2
17	Myl9	Anxa2	Krt8	Ggh	1700086L19Rik	H2afz	Try5	Gng12	Ccl4	Hmgb2	Lsp1	Foxa3	Nnat	Ptn	Rhd	Icam2	Gc	Tff2	Gsta3	Hmgn3	Hmox1
18	Epha4	Slpi	1700011H14Rik	Phgdh	Cpe	Tubb4b	Pdia2	Sdf2l1	Fcgr3	Top2a	Plac8	Mdk	Tubb2b	Tgfbi	Gpx1	Tm4sf1	Resp18	Ctrb1	Fxyd2	Pyy	Ctsb
19	Smoc2	Igfbp2	Mt1	Rps27l	Aplp1	Cdc20	Sycn	Cryba2	Lyve1	Slc9a3r1	Hdc	Selm	Map1b	Cdkn1c	Cd24a	S100a16	Clps	Rnase1	Mdk	Cryba2	Ccl2
20	Akap12	Col1a1	Apoc1	Ranbp1	Gast	Cldn7	Erp27	Slc30a8	Ccl3	Stmn1	Nfkbia	Gfra3	Nefl	Hmgb1	March2	Flt1	Pcsk1n	Klk1	Ambp	Fev	Tyrobp
21	6330403K07Rik	Ccdc80	Dcdc2a	Nop10	Fam183b	Gmnn	Arhgdig	Atp2a2	Mrc1	Gas1	Tyrobp	Neurod1	Ckb	Lockd	Fam220a	Cdh5	Serpini2	Spink1	Vnn1	Tmem27	Sepp1
22	Gap43	Osr1	Eno1	Asns	Isl1	Adamts1	Mt1	Resp18	Cxcl2	Cenpa	Il7r	Ffar2	Serpine2	Cenpe	Klf1	H2-D1	Spink1	Cel	Grb10	Pcsk1n	Lyve1
23	Fstl1	Slc9a3r1	Epcam	Rrm2	Hmgn3	Bex1	Try10	Fam183b	Aif1	Anxa2	Cd7	Ppp1r14a	Elavl4	Tuba1b	Hemgn	Sparcl1	Vtn	Pnliprp2	Trim28	Scgn	Cxcl2
24	Col3a1	S100a10	Fmo2	Cckar	Cryba2	Cited1	Tmem97	Chgb	Hmox1	Tpm1	Ly6e	Mfng	Tagln3	Acta2	Fam210b	Kdr	Tmem97	Gp2	Atp1b1	Lrpprc	Mrc1
25	Des	Rcn3	Hhex	Ambp	Gnas	Tuba1c	Cela1	Manf	Ctsc	Wt1	Ptprcap	Cyb5r3	Cdkn1c	H2afx	Alad	Cd34	Ambp	Reg2	Tsc22d1	Pax6	Ctss
26	Igfbp4	Col1a2	Adamts1	H2afz	Lrpprc	Eno1	Gstm1	Prlr	Fcgrt	Alad	B2m	Smarcd2	Tubb5	Ccnb2	Cpox	Cav1	Ptf1a	Amy1	Ptprf	Aplp1	Snca
27	Sfrp1	Nbl1	Tm4sf4	Set	Pam	Ccnd1	Tmed6	Ucn3	Ms4a6b	Col3a1	Junb	Tff3	Sox11	Spc25	Mgst3	Col4a1	Cel	Reg3b	Nkx6-1	Gast	Ms4a6c
28	Bgn	Serping1	Cym	Cpn1	Dbpht2	Krt18	Gamt	Pcsk1	Csf1r	Rarres2	Gmfg	2010107G23Rik	Pcp4	Tpx2	Fth1	Rgcc	Gadd45a	Cpa1	Eif3f	Neurod1	Mkrn1
29	Lpar1	Cryab	Cldn6	P2rx1	Pax6	Cenpf	P4hb	Syt13	Klf2	Ldhb	Laptm5	Cpt2	Ppp1r14b	Nucks1	Bnip3l	Gpihbp1	Reep5	Dmbt1	Rbp1	Isl1	Ms4a7
30	Nr2f2	Igf2	Acot1	Srm	Dnajb1	Cldn6	Klk1	Ndufs2	Cx3cr1	Cdc20	Fxyd5	Sox4	Cck	Cdca8	Mt2	Sdpr	Gamt	Try10	Zcchc11	Fam183b	Fech
31	Tagln	Aebp1	Ambp	Pa2g4	Scg2	Id2	Cckar	Sytl4	Ccl6	S100a10	Dusp1	Vwa5b2	Mllt11	Id1	Ctse	Gimap6	Cela2a	Pnliprp1	Marcksl1	Tspan7	F13a1
32	Lum	Alad	Cldn7	Dctpp1	Scg3	1700011H14Rik	Gcat	Pax6	Gatm	Spc25	Alox5ap	Cldn6	Cthrc1	Nr2f2	Cldn13	Gimap4	Ctrb1	Pdia2	Hdgf	Scg3	Klf2
33	Tpm2	Serpinh1	Atp1a1	Bex4	Hspa1a	Cdca8	Ppib	Gch1	B2m	Osr1	Rgs2	BC023829	Nefm	Epha4	Ube2l6	Clec14a	Gstm1	Cuzd1	Kdm5b	Zcchc18	Fcgr3
34	Meg3	Bcam	Wfdc2	Eif5a	Scgn	Birc5	Aqp12	Sec11c	Ccl9	Nusap1	Napsa	Cbfa2t3	Ccnd1	Ube2s	Prdx2	Aqp1	Bex2	Nupr1	Gas1	Pcsk2	Gatm
35	Dlk1	Aprt	Aldoc	Ncl	Zcchc18	Dbi	Scd2	Creld2	Pld4	Hspb1	Psmb8	Btg2	Cadm1	Smc2	Hsd3b6	Aplnr	Tmem27	Prss3	Nrep	Gch1	Pld4
36	Prrx1	Ldhb	Gas6	Pla2g12a	Gch1	Ccnb1	Mt2	Gip	Trf	Aldh1a2	Cd53	Gpx2	Pcbp4	Cald1	Slc4a1	Vamp5	Ffar2	Prss1	Mtch1	Mafb	Cd83
37	Id1	Gas1	Pamr1	Xbp1	Mafb	Ccnb2	Vtn	Papss2	Coro1a	Cdca8	Fcer1g	Insm1	Rbp1	Mki67	Ubac1	Madcam1	Pcsk2	Mt1	Mdfi	Fam220a	Ctsc
38	Ebf1	Lgals7	Mia	Ifitm3	Neurod1	Mgst1	Serpini2	Prnp	Laptm5	Arl6ip1	Tmsb4x	Mtch1	Vim	Cdca3	Hebp1	Rbp7	Isl1	Gm10334	Chd3	Mid1ip1	Cx3cr1
39	Uba52	Tpm1	St3gal4	Tmed6	Tmsb15b2	Tyms	Zg16	Slc2a2	Ccl2	Bcam	H2-D1	Tox3	Socs2	Smc4	Urod	Col4a2	Btbd17	Psmb10	Spp1	Bpgm	Ftl1
40	H19	Msln	Hes1	Hspe1	Tspan7	Rrm2	Cela3a	Scgn	Grn	Cryab	Arpc1b	Ypel3	Stmn1	Tubb5	Pnpo	8430408G22Rik	Cela1	Cpa2	H19	Tm4sf4	Cd68
41	Sfr1	Wt1	Sphk1	Aldh1b1	Tm4sf4	Tuba1b	Gc	Hist1h2al	Fcrls	Dmkn	Cd69	1110012L19Rik	Fscn1	Ebf1	Rrm2	Cd36	Gcat	Erp27	Meg3	Cldn4	Csf1r
42	Il11ra1	P3h4	Ces1d	Ran	Bex2	Ccdc34	Serp1	Hadh	Ctsd	Bst2	S100a4	Tecr	Tcf4	Ccnb1	Glrx5	Myct1	Igfbpl1	Mt2	Cldn3	Gypa	B2m
43	Igf2	Sulf1	Vnn1	2810417H13Rik	Mid1ip1	Mt2	Rbpjl	Tspan7	Arpc1b	Smc4	Rgs1	Spint1	Rgcc	Mfap2	Rhag	Slc9a3r2	Spint2	Aqp12	Smtnl2	Slc25a37	Aif1
44	Zeb2	Rarres1	Muc1	Hmgb2	Map1b	Clu	Prss1	Gpx3	Ptpn18	Col1a1	Tspo	Cacna2d1	Lmo4	Cks1b	Epb41	Id3	Ggh	Gm42418	Tax1bp3	Hepacam2	Ms4a6b
45	Nrk	Laptm4a	Pebp1	C1qbp	Sct	H2afx	Rps27l	Dnajb9	Ms4a7	Ccnb1	Hebp1	Dbn1	Elavl3	Prc1	Fam46c	Cd93	Cpn1	Fkbp11	Aes	Pim2	Snx2
46	Snhg18	Cd81	Aplp2	Spc24	Iapp	Cldn10	Dhx34	Ssr4	Cd68	Rcn3	Anxa1	Krtap17-1	Bub3	Cdc20	Trim10	Tmem88	Pla2g12a	Hamp2	Csrp2	Syt13	Tmsb4x
47	Hes1	Emp3	Ppp1r1b	Cycs	Abcc8	Hmga2	Amy2a5	Mlxipl	Spi1	Fbln2	Lcp1	Map1b	Metrn	Hjurp	Dhrs11	B2m	Gpx3	Lcmt1	Rest	Dbpht2	Fcrls
48	Pcolce	Fbln2	Gstt1	Serp1	Slc30a8	Tk1	Ptf1a	Acly	Cd74	Serpinh1	Limd2	Gdpd1	Crmp1	H2afv	Asns	Msn	Aplp1	Tmed6	Pafah1b3	Gpx3	Fcgrt
49	2024-09-11	Akr1b3	Habp2	Mif	Gm8797	2700094K13Rik	Edem1	Rab3a	Dusp1	Prc1	Cd82	Syt13	Slc10a4	Prrx1	Lmo2	Vim	Cpe	Serpini2	Barx1	Gnas	Ctsd
50	Rgs5	Aldh1a2	Wfdc15b	Plk2	Etv1	Bex4	Rnase4	Fkbp2	Lst1	Ccdc80	Shisa5	Aplp1	C1ql1	Sfrp1	Chac2	Gngt2	Pcbd1	Amy2a2	Hhex	Ubqln2	Grn
51	Islr	Nkain4	Wfdc10	Nme1	Prnp	Lig1	Edem2	Enho	Rac2	Sulf1	Itga4	Casp6	Mef2c	Cdk1	Tmem14c	Klf2	Tmed6	Gatm	Cdv3	Rap1b	Dusp1
52	Lgals1	Upk1b	Tmem176b	Spink1	Cst3	Ran	Rrbp1	Tmem215	Cyba	Pttg1	Gpsm3	Cd63	Cnn3	Tuba1a	Mt1	Gimap1	Sct	Amy2a5	Zfp644	Smarca1	Clec4n
53	Rps27	Pmp22	Kifc3	Tmed2	Hepacam2	Arl6ip1	Prss2	Nkx6-1	Gmfg	Tubb4b	Emb	Mpzl1	Marcks	Hes1	Rbm38	Fkbp1a	Stard10	Gm5771	Zfhx3	Prnp	Hexa
54	Emilin1	Ptrf	Cldn10	Ldha	Syt13	Ranbp1	Ang	Mafb	Stab1	Tubb5	Gpr183	Nkx6-1	Postn	Stmn1	Rfesd	Elk3	Asns	Reg3d	Rps18-ps3	Pcsk1	Blvrb
55	Ifitm1	Sfrp1	Sdc4	Anp32b	Pim2	Kcnk1	Reg1	Trpm5	Maf	Sfrp1	Cmtm7	Gm8773	Sox4	2024-09-11	Tfrc	Nrp1	Neurod1	Cabp2	Cdk4	Scg5	Cyba
56	Col6a1	Ppic	Ccnd1	Tmem238	Gatsl2	Tinagl1	Pnliprp2	Camk2n1	Hexa	Col1a2	Ctss	Bambi	Tgfb2	Smoc2	Adipor1	Tagln2	Scg5	Arhgdig	Hnrnpd	Ttr	Gmfg
57	Cxcl12	Smim1	Myl12b	Gm2000	Peg10	Fmo2	P2rx1	Bace2	Snx2	Tmem108	Selplg	Cdk2ap1	Dlx2	Fam64a	Ermap	Gnai2	Nkx2-2	Ggh	Arl4c	Scg2	Ccl24
58	Slit2	Dlk1	Id2	Ybx1	Fev	Ambp	Tmed3	Slc2a5	Ftl1	Ccnb2	H2-DMa	Cystm1	Kif21a	Ccna2	Tmcc2	Tcf4	Fev	Gstp1	Ldhb	Cystm1	Gypa
59	Rpl39	Gpm6a	Nit2	Tyms	Cystm1	Cks1b	Ambp	Fam151a	Ccl12	Barx1	Pim1	Lpar6	Ndufa4l2	Tubb4b		Prkcdbp	Foxa3	Tmed11	Dusp9	March2	Ctsz
60	Pdgfrb	Ifitm1	Rbp1	Smco4	Lgals3bp	Dusp9	Insig1	Abcc8	Ehd4	Crip1	H2-K1	Neurod2	Syt11	2700094K13Rik		Lmo2	Xbp1	Ggt1	Atp2b1	Ins2	C5ar1
61	Runx1t1	Fxyd1	Fxyd2	Ppib	Zbtb20	Tubb5	Ggh	Ndufa1	C5ar1	Cenpm	Zfp36	Ctsf	Crip2	H2afz		Plpp1	Cckar	Nucb2	Ccnd3	Abcc8	Ccl7
62	Gpc3	Arhgap29	Chka	Prdx6	Cldn4	Wfdc15b	Krtcap2	Ece1	Arhgdib	Smc2	Psap	Krt8	Syt1	Hist1h1b		Tpm4	P2rx1	Slc39a5	Atxn7l3b	Slc25a5	Ptpn18
63	Serpine2	Efemp1	Cxadr	Uchl5	Gnao1	Pebp1	Sec61b	Gm10320	Trem2	Aprt	Slc6a13	Trp53i11	Fabp5	Pdgfrb		Arhgap31	Rps27l	Hist1h2al	Fzd2	Pam	Stab1
64	Ccnd2	Igf1	Bsg	Dap	Pak3	Hes1	Ass1	Tmed3	Npl	Dek	Asb2	Rcor2	Zeb2	Incenp		Mgll	2210010C04Rik	Crlf1	Krt18	Ypel3	Ltc4s
65	Lhfp	Klk8	Slc28a3	Ptma	Hist3h2ba	Lurap1l	Cym	Nucb2	Ms4a6d	Cks1b	Il2rg	Tmem59	Nsg1	Col1a1		Pcdh17	Tmem238	Ppy	Ube2r2	Slc30a8	Npl
66	Lmo4	Tmem108	Cystm1	Cks1b	Gadd45g	Habp2	Psmb10	Tm4sf4	Sat1	H2afv	Cst3	Mfap4	H2afz	Tubb6		Fbln5	Slc25a5	Amy2a3	Col27a1	Ffar4	Ccl12
67	Zeb1	Wls	Smtnl2	Ddx39	Rap1b	Cdca3	Ifitm3	1110008P14Rik	Cotl1	Crabp1	Cyba	Chd7	Hn1	Gucy1b3		Igf2	Hes6	Gnmt	Flrt2	Bex2	Laptm5
68	Nfib	Csrp2	Selenbp1	Uchl3	Mageh1	Smc4	Gm10320	Tmem27	Ier3	Igfbp6	Cd37	Arf5	Sox10	Bgn		Ptprb	Cpb1	Msrb1	Igf1	Mlxipl	Slc40a1
69	Rps28	Tmem151a	Kcnk1	Tinag	Cplx2	Prc1	Sec61g	Ffar1	Psap	Zcchc3	Slfn2	Grasp	Cryab	Col1a2		Plpp3	Hspd1	Reep5	Rbms3	Rab3a	C3ar1
70	Tmsb10	Gpx8	Sat1	Homer2	Sfrp5	Pbk	Cbs	Sec61b	Mef2c	Cdk1	Prtn3	Tmem184a	Cnp	Serpine2		Sparc	Hmgn3	P4hb	Rps5	Ins1	Ifi30
71	Htra3	Ezr	S100a11	Epcam	Vwa5b2	Pttg1	Aqp8	Pak3	Rgs10	Lockd	Ncf4	Rgs17	Slitrk6	Knstrn		Ipo11	Tpd52	Sec11c	Col18a1	Gm43861	Ctsa
72	Rcn3	Krt7	Gm10260	Fen1	1500011B03Rik	Tst	Phgdh	Fkbp1b	Blvrb	Pmp22	Hp	Igsf8	Psip1	Dek		H2-K1	Cela3b	Sel1l	Igf2	Map1b	Hpgds
73	Maged2	Barx1	Zbtb20	Ppa1	Gabarapl2	Vnn1	Fabp5	Neurod1	Clta	H2afz	Pglyrp1	Hn1	Dlx1	Marcks		Timp3	Serpini1	Rbpjl	Bicc1	Gabarapl2	Adrb2
74	Timp3	Vim	8430408G22Rik	Edem2	Slc7a2	Mia	Cldn10	Slc35b1	Alox5ap	Igf2	Sh3bgrl3	Mrfap1	Hand2	Aurkb		Gja4	1700086L19Rik	Resp18	Mfap4	Mageh1	Unc93b1
75	Basp1	Igfbp4	Osgin1	Mrpl42	Emb	Hpgd	Asns	Zc3h3	Unc93b1	Ezr	Lst1	Lrpap1	Cdh2	Lpar1		Esm1	Tuba4a	Aqp8	Nit2	Pak3	Nrros
76	Cnn2	Tm4sf5	Pah	Prdx1	Xist	Nudt19	Ctrc	Hepacam2	Clec4a2	C1d	Ptpn18	Serpina1c	Mbp	Cnn2		Fam101b	Dap	Serp1	Tead2	Meis2	Cd53
77	Vim	Egfl6	Cd24a	Dhx34	Ubqln2	Rbp1	Dap	Ociad2	Ccl24	Tubb6	Calca	Calm2	Hnrnpa1	Gap43		Igfbp3	Rnase4	Ero1lb	Ngfrap1	Tmsb15b2	Fth1
78	Osr2	Eln	Slc2a2	Nhp2	Spint2	Hhex	Tff2	Chic1	Zfp36	P3h4	Ctsc	Qdpr	Eif1b	Des		Adgrf5	Edem2	Reg3a	Pnrc1	Prrg2	Ms4a6d
79	Ccnd3	Plat	Tst	Fkbp11	Sphkap	Dynll1	Gm15915	Hyou1	C3ar1	Tk1	S100a10	Gspt1	Hoxd4	Sfr1		Gnas	Ddc	Amy2a4	Bex4	Mapre3	Arpc1b
80	Csrp2	Pdpn	Smim22	Rbpjl	Ffar4	Phgdh	Sdf2l1	Smim14	Ctsa	2700094K13Rik	Ppp1r15a	Cyth2	Chodl	Emilin1		Acvrl1	Set	Klk1b5	Pamr1	Ppp1r1a	Clec4a2
81	Marcks	Fbln1	Tstd1	Myc	Lpl	Spc25	Rpl38	Selk	Hpgds	Tpx2	Lmo4	Tmem171	Ncam1	Ccdc34		Ly6a	Ttll6	Snhg9	Srsf2	Emb	Cd14
82	Serpinh1	Mgp	Crb3	Ube2c	Jund	Cenpa	Nucb2	Ptprn	Cst3	Nbl1	Bcl2	Spint2	Gng2	Igfbp4		Epas1	Prss2	Rap1gap	Rnf187	Dnajc12	Lst1
83	Dlc1	Klk13	Nudt19	Zfp706	Rnf130	Dut	Xbp1	Gadd45g	Klf6	Cdca3	Ccl9	Sct	Hes6	Zeb2		S100a13	Epcam	Ifrd1	Cited1	Cplx2	Rac2
84	Spats2l	Ptgis	Adamts9	Rnh1	Upk3a	Wfdc10	Tram1	Maob	Ninj1	Racgap1	Gpx1	Mob4	Pcbp3	Il11ra1		Lxn	Bex1	Chst2	Kcnq1ot1	Glud1	Rgs10
85	Ppic	Calml4	Tmbim6	Npm1	Ypel3	Dhfr	Chst2	Sez6l2	Cd53	Nfib	Serpinb1a	Cer1	Lix1	Akap12		Rasip1	Rph3al	Dhx34	Wbp5	1500011B03Rik	Arhgdib
86	Auts2	Lrrn4	Laptm4b	Mrpl12	Igfbp7	H1f0	Rplp1	Pam	Ctsz	Cd81	Gm2a	Tpst2	Gpm6b	Fam162b		Gchfr	Vwa5b2	Sostdc1	Vgll4	Peg10	Ehd4
87	Col6a2	Tgm2	Cdh1	Birc5	Pnmal2	Smc2	Fam46c	Pdx1	Fcna	Rrm2	Cotl1	Vasp	Ndn	Bub3		Efna1	Zdbf2	Bhlha15	Ppp2ca	Efcab1	Car2
88	Tcf4	Gas6	Rab25	Hacd1	Slc25a5	Fkbp4	Cpn1	Selm	Nrros	Mki67	Cxcr6	Foxa2	Kif5c	Tacc3		Fscn1	Bex4	Gcat	Mex3a	Etv1	Maf
89	Sema5a	Cald1	Anxa4	Lsm4	Tmsb15l	Dtymk	Ssr1	Insm1	Adrb2	Ube2s	Bcl2a1b	Psmc2	S100a16	Arl6ip1		Mef2c	Tinag	Cckar	Rpl18a	Rph3al	Bpgm
90	Pbx1	Sepw1	Scara3	Eif4a1	Zdbf2	Spc24	Rap1gap	Mien1	Itm2b	Upk1b	Nkg7	Tmc4	6330403K07Rik	Hmmr		Mmrn2	Tmed2	Klk1b3	Crb3	Wnk3	Ccl9
91	Ldb2	Mfap2	Hpgd	Eif1ax	Nap1l5	Bicc1	Rnh1	Ufm1	Cd14	Emp3	Rora	1810008I18Rik	Cfl1	Spc24		Anxa3	Homer2	Cbs	Zfp637	Tmsb15l	Trem2
92	Timp2	Ctsl	Eps8l2	Srsf7	Sez6l2	Lsm3	Ggt1	Gjd2	Ltc4s	Gpx8	Pld4	Camk2n1	Marcksl1	Plk1		Ppic	Aldh1b1	Edem1	Pfn2	Atp6v0b	Coro1a
93	Phactr2	Rprm	Errfi1	Fam136a	Itm2c	Dek	Sel1l	Gfpt1	Ostf1	Pdpn	Spi1	Prrg2	Isoc1	Uba52		Sgk1	Lyar	Derl3	Serpinf1	1110008P14Rik	Itm2b
94	Rps12-ps3	Rspo1	Anxa5	Lsm5	Rasd1	Hmgb3	Spint2	Spock2	Fth1	Kcnj8	Ccr2	Steap1	Gpr22	Hist1h2ae		Gimap5	Dhx34	Tsga10ip	Nav2	Pou3f4	Zfp36
95	5033428I22Rik	Pitx2	Erich5	Cks2	Fos	Hmgn2	Ssr4	Atp2a3	Plin2	Ppic	2024-09-01	Klc3	Btg1	Lgals1		Ehd4	Mtch1		Mxd4	Tusc3	Slc25a37
96	Olfml3	Serpinb1a	Tnfrsf12a	Bex1	Hap1	Tacc3	Ssr2	Syndig1l	Cd83	Krt19	Ostf1	Psmd4	Slc25a4	Fstl1		Emp1	Cacna2d1		Fmo2	Gdi1	Lcp1
97	Meis2	Kcnj8	Ehf	Pcbd1	Atp5l	Aldh1b1	Rps24	Isg20	Ifi30	Nr2f1	Btg1	Zdbf2	Hmgb3	2024-09-07		Col15a1	Chga		Rps27a	Sct	Trf
98	Myh10	Col14a1	Slc15a2	Gar1	Sdf4	Tpx2	Plk2	Aplp1	Fyb	Ckap2l	Hcls1	Kirrel2	Dbn1	Dlk1		Snrk	Spint1		Akr7a5	Pdx1	March2
99	Gm10073	Sdpr	S100b	Nop58	Rab3a	Mad2l1	Itga6	Il1r1	Wfdc17	Knstrn	Id2	Vps37a	Dcakd	Hmga2		BC028528	Gadd45g		Hsd17b10	Gnao1	Ednrb
100	Ahnak	Ndn	Capg	Uqcrb	Gars	Nkx6-1	Fxyd3	Hspa5	Lcp1	Klk8	Tagln2	Celf3	Dlx5	Lhfp		Sox17	Akr1c13		Cdc42ep3	Ctsf	Sat1
101	Fbn1	Tm4sf1	Grb7	Rfc4	Pou3f4	Ccna2	Bhlha15	Rasd1	Tgfb1	Tubb2b	Sla	Tuba4a	Rnf187	Tril		Calm1	Foxa2		Prdx2	Tmem163	Lamp1
102	Kcnq1ot1	Bmp4	Col9a3	Cldn10	Ap1s2	Nusap1	mt-Atp8	Phactr1	Fcgr1	Wls	Fos	Cotl1	Dnajc1	Myh10		Rbp1	Dbpht2		Ddah2	Gng12	Smagp
103	Cd248	C3	Hpn	Dut	Junb	Plk1	Rpl36	Frzb	Slc40a1	Ccna2	Batf	Glrx	Ddah2	Rgs5		Ppp1r2	Rgs17		Ctxn1	Celf3	Ccr1
104	Meis1	Fis1	Atf3	Fkbp3	Upp1	Mki67	Pcbd1	Fam174b	Ncf2	Siva1	Irf8	Cd24a	Arl2bp	Nrk		Tgfb1	Hacd1		Sox11	Gars	Gpx1
105	Glipr2	Cldn15	Rhob	Slc25a5	Dnajc12	Deb1	Qsox1	Gnas	Irf8	Fgf9	Ptpn6	St3gal6	Hmx2	Kif23		S100a10	Fam183b		Nedd4	Ptprn2	Osm
106	Eln	6330403K07Rik	Krt19	Srp19	Dynlt1c	Kif23	Rps12	Pclo	Lamp1	Podxl	Ccl4	Pclo	Srrm4	Tpm4		Edn1	Gfra3		Gm26917	Nkx2-2	Klf6
107	Cmtm3	Zcchc3	F11r	Cdc20	Cck	Gapdh	5330417C22Rik	Ap1s2	Clec4a1	Plat	Ucp2	Swt1	Ptprz1	Tpm2		Nrp2	Serp1		Rpl18	Vwa5b2	Spi1
108	Kcnj8	Ntm	Acadm	Ifrd2	Btg2	Fmo1	Dnajc3	Sphkap	Neat1	Hist1h1b	Tgfb1	Dnaja1	Tuba1b	Snhg18		Lpar6	Arx		Rpl8	Runx1t1	Mef2c
109	Mmp2	Ogn	Slc44a3	Dtymk	Malat1	Rangap1	Atp5g1	Cd164	Hspa1a	Ndn	Capg	Pkib	Ngfr	Ddah2		Abhd17a	Pax6		Nr2f2	Zbtb20	Fyb
110	Tril	Fgf9	Adk	Nolc1	Atp6v0b	Prdx1	Msrb1	2210019I11Rik	Fos	Nasp	Ccl6	Tmed4	Dclk1	Kif22		Arpc3	Ppib		Ythdc1	Krt7	Ier3
111	Pid1	Sfrp2	Prss8	Hmgn2	Meis2	H3f3b	Rpn1	Spcs3	Ccl7	Smim1	Ifngr1	Gadd45gip1	Fbxw7	Mis18bp1		Aplp2	Lrpprc		Cmtm8	Anxa4	Folr2
112	Igf1	Ccnd3	Cp	Pttg1	Trim35	Tmem45a	Serf2	Snap25	Folr2	Egfl6	Samsn1	Prox1	Hsp90aa1	Mxd3		Smagp	Ctrc		Polr2m	Isg20	Ly86
113	Plpp3	Tpm2	Hrsp12	Ccnb1	Camk2n1	Anp32b	Homer2	1500011B03Rik	Rgs2	Alcam	Ptprc	Prodh2	Chd7	Snrpg		Ehd2	Ssr2		Nrk	Prps1	Mmp9
114	Tpm1	Ptgds	Gjb1	Wfdc15b	Celf3	Ssrp1	Gstm7	Gm8797	P2ry6	Klk14	Cd3g	Ubald2	Zc3h15	Racgap1		Tspan13	Glud1		Rtn4	Cacna2d1	Psap
115	Nkain4	Ahnak	Spink4	Pbk	Pcbd1	Hn1	H19	Derl3	Nfkbia	Tacc3	Itgb7	Lrrc42	Elavl2	Aurka		Nkx2-3	Srm		Rps3	Gnptg	Clec4a3
116	Gucy1b3	Podxl	Cadm1	Atp5g1	Cpq	Cadm1	Aldh1a1	Surf4	Ifngr1	Lsm2	Pycard	Gdap1l1	Rtn4	Tcf4		Kank3	Phgdh		Eif3h	Bnip3l	Tgfb1
117	Rplp0	Nfib	Smco4	Arpp19	Arx	Ube2s	Rpl41	Efcab1	Gas6	Bmp4	Btg2	Gm42637	Tbx3	Cenpm		Sptbn1	Tmed3		Rpl21	Zdbf2	Clta
118	Tuba1a	Tmsb10	Sorbs2	Umps	Gdi1	Hmgn1	Rpl5	Entpd3	Atf3	Lrrn4	Cd48	Ambp	Gas7	Efhd2		Abcg2	Fkbp11		Pcbp1	Ube2l6	Clec4a1
119	Fscn1	S100a11	Tmc4	Phlda1	Rph3al	H2afv	Rhov	Rasgrf1	Arpc2	Dynll1	Msn	Slc38a5	2024-09-07	Fscn1		C1qtnf9	Cldn6		Pbx1	Cd164l2	Ostf1
120	Ndufa4l2	Npnt	Bex1	Cel	Fosb	Hsp90aa1	Serpinf2	Spock1	Snx3	Akr1b3	Fermt3	Mia	Ttc3	Ckap2l		Ifitm3	Sec61b		Rab25	Sphkap	Cotl1
121	Gpc6	Hcfc1r1	Cfi	Tex30	Rundc3a	Hmgb1	Prss3	Dad1	Clec4n	Klk13	Gata3	Cxxc5	Basp1	Igf2		Igfbp4	Cycs		Sfpq	Atp5l	Gas6
122	Fblim1	Maged2	Prr15l	Cyb5b	Smarca1	Srsf7	Ndufs6	Cltb	Ly86	Arhgap29	Traf1	Marcksl1	Fkbp1a	Zeb1		Cnn2	Peg10		Eps8l2	Pnmal2	Plin2
123	Gm10076	Fgfbp1	Tle6	Dpy30	Ubb	Fxyd2	Fkbp2	Vps8	Smagp	Aebp1	Gimap1	Amotl2	Csnk1e	Lmo4		Ralb	Pa2g4		Akirin2	Capsl	Mpp1
124	Eva1b	Nenf	Proser2	Tomm40	Rgs4	Cd24a	Tinag	Uqcc2	Dok2	Spc24	Fam105a	Actg1	Hnrnpab	Myl9		Rhoc	Akr1c12		Set	St18	Fcgr1
125	Amot	Tsc22d1	Jun	Erh	Prps1	Slbp	Spcs3	Fmo1	H2-D1	Lmnb1	Actr3	Atp6v0b	Snrpn	5033428I22Rik		Plxnd1	Dynll2		Pcbp4	Hap1	Neat1
126	Rps29	Emp2	Lbp	Hprt	Cnot6l	Smco4	Pdia6	Ift20	Actb	Npnt	Cd79b	Chgb	Apbb1	Olfml3		Dok4	Pam		Siva1	Slc48a1	Sirpa
127	Aspn	S100a16	Gm37350	Gmnn	Mapk15	Hells	Uqcrq	Rundc3a	Tnfaip8l2	Cald1	Arpc2	Zfand6	Fbln1	H19		Ctsz	Prdx6		P4ha3	Epb41	Snx6
128	Rpl35	Fam162a	Aes	Lrrc59	Wnk3	Smtnl2	Rpl12	Npdc1	Adgre1	Cenpe	Mbnl1	Fgd2	Kif1b	Hnrnpdl		Tmsb4x	Rbpjl		Gtf2i	Plcxd3	Glul
129	Nid1	C1d	Aldoa	Snrpf	Glud1	Ugt2b34	Rps14	Syp	Ednrb	Nr2f2	Glipr1	Plk3	Prdx2	Dlc1		Pea15a	Zg16		Rps4x	Gck	Tpp1
130	Gucy1a3	Nr2f1	Acadl	Sephs2	Ptprn2	Sae1	Kctd14	Rab27a	Snx5	Cfl2	H2-DMb1	Gstz1	Srsf2	Col3a1		Sh3bgrl3	Cxxc5		Fjx1	Kcnmb2	Cd300a
131	Loxl1	Timp2	Bex4	Rsl1d1	Rogdi	Psat1	Smco4	Vdr	Ptpn6	Hmmr	Sec11c	Lhx1	Ybx1	Hist1h1e		Tie1	Smco4		Ppdpf	Ap1s2	Ptpn6
132	Ndn	Pdzrn4	Jund	Ddc	Efcab1	Tmpo	Mif	Hagh	Ctsh	Nucks1	Ldha	Olfm1	Ube2s	Mfap4		Pon2	Tmed10		Evi5	Maged1	Alox5ap
133	Tppp3	C2	Krt23	Apex1	Gria2	Nucks1	Tsga10ip	Gnptg	Fxyd5	Serping1	Prr29	Atxn10	Lmna	Fermt2		Cd9	Erp27		Phf14	Akr1c13	Gusb
134	Rps21	Col6a2	Trim47	Ssr2	Prrg2	Emc6	Ttc23	Dnajc3	Il1b	Hmgn1	Stk17b	Gtf2a2	Stmn4	Nfib		Apold1	Nme1		Map1lc3a	Rogdi	Dok2
135	Tenm4	Cdkn1c	Hsd17b10	Ndufab1	Ocrl	Col9a3	Gm10334	Cplx2	Pycard	Lig1	Ifitm6	Ppp1r14b	Ccnd2	Gucy1a3		1810011O10Rik	Gnas		Zfos1	Hist3h2ba	Lyl1
136	Rhoc	Clec11a	Gsta4	Spcs2	Pappa2	Shcbp1	Ssr3	Emb	Man2b1	Rspo3	Neat1	Dnajb6	Eif5a	Lsm2		Cd81	Insm1		Hsp90ab1	Lrpap1	Scamp2
137	Unc5c	H19	Cat	Cnbp	Ctsf	Crb3	Magt1	Derl2	Ckb	Tmsb10	Tcf7	Serinc2	Nme1	Srsf3		Ebf1	Uchl3		Aprt	Ociad2	Lilrb4a
138	Tac2	Cd82	Fam3c	Mgst1	Mapre3	Sphk1	Rbp2	1700086L19Rik	Cd52	Laptm4a	Sat1	Pla2g2d	Ptov1	Tmsb10		Hspb1	Tox3		Rhobtb3	Sez6l2	Rab3il1
139	St6galnac3	Krt15	Cxcl12	Nop56	Ssr4	Hspd1	H13	Adra2a	Rab3il1	H2afy2	AI662270	Mapk3	Id1	Timp3		Ets1	Hepacam2		Bri3	Tmc4	Clec10a
140	Fxyd6	Rhoc	Ptprf	Rpa3	Cox17	Nasp	Rab3d	Disp2	Ap2s1	Fbn2	Ccrl2	Atp6v1g1	Nell2	Islr		Prex2	Ang		Smco4	Gipr	Cndp2
141	Mylk	Efna1	Ier2	Fkbp4	0610011F06Rik	Snrpd1	Gatm	P2ry1	Clec10a	Tspan4	H2-DMb2	Stx16	Dbh	Tk1		Grap	Rnh1		Sphk1	Pnmal1	Cfp
142	Col26a1	Map1lc3a	Grb10	Npm3	Camk2b	Prmt1	Gnmt	Prkacb	Glul	Ptrf	Ms4a6c	Rap1gap2	Sfpq	Emp1		Ptrf	Gatsl2		Meis1	Cnot6l	Pla2g7
143	Syt6	Ktn1	Rnf128	Rnase4	Hagh	Rbbp7	Wfdc15b	Hopx	Emp3	Ptn	Cd47	Tle6	Glrx3	Fbxo5		Limch1	Ppp1r14b		Habp2	Pcsk2os1	Fos
144	Hand2	Tspan4	Actn4	Rps18-ps3	Npdc1	Acadl	Rpl10	Slc7a2	Cybb	Tm4sf5	Arpc3	Rbfox3	Csrp1	Sgol1		Rdx	Etv1		Enpp2	Ppm1b	P2ry6
145	Sepw1	Akap12	Nrtn	Cyc1	Gm43861	Mcm7	Serpini1	Lrp11	Lgals3	Dlk1	Ncoa7	Tsg101	Mfap2	Meis2		Fli1	Abcc8		Luc7l3	Mien1	Slfn2
146	Snai2	Tapbp	Tmem176a	Hmgb1	Ffar2	Fam3c	Rpl28	Sfrp5	Ccr1	Pitx2	Ier2	Apoc1	H2afy2	Rdx		Procr	Phlda1		Hyal2	Gprasp2	Fcna
147	Snrpg	Cers4	Cldn4	Psmd7	Ctxn2	Nsmce4a	Matn4	Pnmal2	Arpc3	Id3	Zfp36l1	Gse1	Ptms	Osr2		Cd151	Mid1ip1		Kdm1a	Lrp11	Fam220a
148	Nrp1	Gpc3	Fmo1	Cdk1	Cltb	Srsf3	Espn	Hspa1a	Vsir	Gpm6a	Ifi30	Ttc5	Timp3	Hmgb3		Tspan6	Dpy30		Srsf9	Klc3	Irf8
149	Axl	Tmem88	Tm9sf3	Lsm3	Tmed3	Rfc5	Car9	Hspa13	Slfn2	Fis1	Ikzf2	Cnot7	Hnrnpa2b1	Sema5a		Gmfg	Nop10		Prrc2c	Snx15	Msr1
150	Ddah2	Nrep	Arrdc1	Dkc1	Slc16a10	Col9a1	Rpl32	Trp53inp2	Hacd4	Kif22	Crip1	Pde1c	Hoxb4	Smc1a		Tmem204	Cystm1		Mbd3	Ankrd44	Tmem106a
151	Tshz3	Fkbp10	Clmn	1110008F13Rik	Ptprn	Gins2	Rpl35	Arhgap36	Cfp	Incenp	Nr4a1	Pard3	Zfp428	Gng11		Cav2	Peg3		Maged2	Gatsl2	Hspa1a
152	Fermt2	Rcn1	Cd9	Tomm5	Cdkn1a	Vps36	Lbh	Cib2	Serinc3	Lsm3	Tbc1d10c	Malat1	Egfl8	Depdc1a		Sh3bp5	Prrg2		Raly	Rimbp2	Cd86
153	Fosb	Rpp25	S100a1	Cdca8	Lrpap1	Pmf1	Uqcr11	Kcnmb2	Cd86	Tmem151a	Arhgap30	Prdx2	Gm1673	Tra2b		Meox1	Scgn		Nfib	Rock1	Ninj1
154	Ncam1	Sbspon	4931406C07Rik	Exosc7	Gstz1	Lsm2	Parm1	Tmsb15b2	Ifi27l2a	Hmgb1	Celf2	Lingo1	Matn4	Pbk		Myl12a	Spcs2		Pebp1	Chic1	Slc3a2
155	Slc25a4	Tmem119	Afm	Atp5b	Pcsk1	Tkt	Atp5j2	Prps1	Gpx1	Hmgb3	Ccl3	Stxbp5l	Dynll1	Cdca2		Clic1	Tspan7		Syne2	Dusp10	Ncf2
156	G0s2	Tmem98	Fgfr2	Sssca1	Ubl3	Hnrnpa2b1	Rplp2	Mageh1	Cyth4	Tpi1	Cnn2	Ube2b	Ilf2	Fbln1		Hspg2	Cnot6l		Gm266	0610011F06Rik	Asah1
157	Nefm	Tpi1	Mfge8	Snrpa1	Syt7	Cdo1	Sdsl	Tmem163	Arpc4	Echs1	Ly6c2	Casz1	Gfra1	Anp32e		Mfng	Ndufab1		Rpl24	Tekt2	Evi2a
158	Rps26-ps1	Fmod	Nav2	Psma4	Tusc3	Apoc1	Tmem258	Dynlt1c	Cndp2	Hn1	Clic1	Eva1b	Hdac2	Hand2		Grrp1	Cbfa2t3		mt-Atp6	Tuba4a	H2-D1
159	Hic1	Prss23	Ctsh	Bex2	Krt7	Mt1	Bex4	Tmem65	Cfh	Anp32b	Gem	Adrm1	Diablo	Pcdh18		Fxyd5	Wfdc15b		Trip6	Atp6v1b2	Tnfaip8l2
160	Cdh11	B3gnt9	Ugt2b34	Magoh	Maged1	Atp1a1	Stard10	Pcsk2os1	Gnai2	Mxd3	Cyp11a1	Ddx5	Srsf3	Kif20a		Sh3glb1	Scg2		Rbpms	Hdac6	Dusp6
161	Ccdc80	Cd151	Pvrl2	Dnajc3	Gnptg	Hist1h1b	Hdlbp	Tmod2	Kctd12	Dut	Pfn1	Scpep1	Lbh	Kif2c		Cd200	Smarcd2		Rpl26	Gpc4	Cd33
162	Atxn7l3b	Oprk1	Pkhd1	Isyna1	Atf3	Set	Prdx6	Syt7	Rgs1	Tuba1c	Nabp1	Hpca	Actb	Amot		Arpc1b	Pigf		Lurap1l	Entpd3	Rgs2
163	Ttc3	Lgals3	Tmem59	Tcp1	Itm2b	Cenpe	Bcat2	Gnao1	Oser1	Plk1	Actb	Paip2	Ezh2	Basp1		Sox18	Eif5a		mt-Co2	Rgs17	Snx3
164	Osr1	Atg3	Tax1bp3	Ssbp1	Rnf138rt1	Magoh	Cdh1	Dnajb11	Pla2g7	Tsc22d1	Fyb	Cnot6l	Msn	Cmc2		Prcp	Taf10		Taf10	Dctn3	Gm10116
165	Mdk	Fbn2	Enpp2	Stt3a	Ndufa1	Ezh2	Lin37	Tssc4	Rhob	Cenpw	Elf1	Gabarapl2	Qpct	Cenpw		AW112010	Cpt2		Ogt	Tpd52	Creg1
166	Pcdh18	Plp2	Ncald	Cacybp	1110008P14Rik	Grb7	Tspan1	Slc7a14	Ucp2	Sox11	Plbd1	Fyttd1	Cdk4	Sox11		Adam15	Atp5g1		Wapl	Fam210b	Arpc2
167	Kifap3	Crabp1	Rbbp7	Nsmce4a	Uqcc2	Stmn1	Tmed2	Usp9x	Lyl1	Aurka	Ier5	Dstn	Gfra3	Kcnj8		Ostf1	Myc		Mxra7	Rnf130	Renbp
168	Rbm4b	Mmp11	Frrs1	Mt2	Trappc2l	Polr2f	Mlec	Nipal1	Srgn	Srsf2	Bin2	Hbp1	Pfn2	Top1		Plk2	Ybx1		Fras1	Hbq1a	Lyn
169	Fbn2	Anxa5	Trf	Snrpd3	Cacna2d1	Hprt	Ift20	Vstm2l	Snx6	Aurkb	Cd83	Snrk	Zfp536	Fxyd6		Tinagl1	Rnase1		Apoc1	Snap25	Adgre1
170	Igf2r	Myrf	Litaf	Brix1	Cd164l2	Mif	Rpsa	Gck	Sdcbp	Rbms1	Arg1	Nono	Mfng	Runx1t1		Cxx1a	Dnajc3		Zcchc3	Cldn11	Fermt3
171	Celf2	Ppp2r2b	Fermt1	Serpini1	Itpr1	Mxra7	Rpl36a	Cope	Msr1	Kif20a	Cfp	Pcbp4	Hsp90ab1	Ckap2		Trp53i11	Zfp706		Rpl7	Klhl7	Fam105a
172	Col5a2	Nid2	Rassf10	Tmem258	Nkx2-2	Nit2	Srp19	C2cd4b	Evi2a	Kif23	Crlf3	Cd164l2	Traf4	Ran		Bgn	Reg1		Ssbp3	Phyh	Nfkbia
173	Sulf2	P3h1	0610040J01Rik	Matn4	Immp1l	Hat1	Tdh	Pim2	Cltc	Lhx9	Emp3	Traf4	Cd9	Bub1b		Tcf15	Plk2		Apex1	Usp9x	AI607873
174	Pdlim2	Svbp	Zfp637	Lsm2	BC048546	Ptma	Nr5a2	Cox17	Hcls1	Tgm2	Il1b	Smarce1	Filip1l	Ppic		AU021092	Ctsf		Ybx1	Ica1	Gpr183
175	Gm26699	Gsta4	Plpp2	Bzw2	Rgs17	Rfc4	Rpl22	Uggt1	Junb	Ccnd3	Ncf2	Txnip	Sh3gl3	Slit2		Fabp5	Jund		Dcakd	Rab3b	Ckb
176	Rps12	Copz2	Sult1c2	Siva1	Acly	Dnajc9	Mgll	Zcchc18	Lyn	H1f0	Serpina3g	Yipf4	Yaf2	Cbx3		Cmtm3	Nt5dc2		Fkbp4	Efcab10	Ppp1r18
177	Dcn	Tubb2b	Rps18-ps3	Erp27	Mien1	Tipin	Krt18	Uso1	Mpp1	Hmgn2	Nrgn	Pdap1	Sepw1	Serpinh1		Tmem255a	Acly		Kcnj8	Cadps	Ptprc
178	Hmga2	Alcam	Ptp4a1	Gemin6	Capsl	Hnrnpf	Sec11c	Gng4	Fcgr2b	Raly	Hcst	Npepl1	Cotl1	Rpl39		Tnfaip1	Celf3		Bag1	Hagh	Sft2d1
179	Rbms3	Htra1	Junb	Tuba4a	Snap25	Hnrnpab	Snd1	Dnajc24	Ccrl2	Kif2c	Apbb1ip	Hmgn3	2700094K13Rik	Rfc1		Tnfrsf1a	Tmsb15b2		Cited2	Akap17b	Cd48
180	Lsp1	Fhl1	Gpm6b	Rangrf	Hsph1	Erh	Smim14	Guk1	Capza2	Tm4sf1	Tagap	Cdk4	Cfl2	Nefm		Slc43a3	Ubqln2		Efna4	Pcyt1b	Dcxr
181	Tmem100	Epha3	Mmd2	Cct7	PISD	Aurka	Serpinb1a	4833439L19Rik	Fermt3	Fam162a	Nrros	Cib1	Mbd3	Meis1		Anxa2	Syt13		Pdzk1ip1	Foxa2	Gbp7
182	Nbl1	Ube2e2	Tgif1	Mad2l1	Glul	Racgap1	Lcmt1	Hist1h2bc	Npc2	Rarres1	2024-09-06	Rnf114	Hddc2	Cyp20a1		Rhoj	Gspt1		Tshz2	Atp6v1e1	Kctd12
183	Arhgef25	Cpxm1	App	Mt1	Smim22	Mcm6	Aldh1b1	Lysmd2	Zeb2	Nrgn	Gpi1	Bex2	Tpm4	Sgol2a		Scarb1	Uqcrb		Slc2a2	Stxbp5l	Hfe
184	Gpx8	Slc25a4	Prox1	Fbl	Necab2	Nrarp	Rps21	Acvr1c	Ncf4	Sepw1	S100a13	Tspan3	Ndrg2	Hoxb4		Tpst2	Cryba2		Eef1g	Rai2	Hacd4
185	Sparc	Meg3	Cmtm8	Lsm7	Cisd1	Aurkb	Aldh7a1	Srpr	Ccr2	Vim	Evi2a	Cldn11	Ppdpf	Rangap1		Robo4	Cyc1		Hipk2	Pclo	Lmo2
186	Hoxb4	Capns1	Psme1	Pigf	Nenf	Hmmr	Eef1b2	Ank	Lsp1	Tyms	Rgs18	Cdc14b	Ran	Gm8186		Cyyr1	Rpl10-ps3		Rpl14	Rundc3a	Rap1b
187	Hoxa5	Myl12a	Vamp8	Exosc8	Dst	Cenpw	Atp5k	Rimbp2	Arpc5	Ntm	Ramp1	Slc39a2	Sap30	Gm10073		Vat1	C1qbp		Rpl9-ps6	Necab2	Abhd12
188	Mfge8	Tmem176b	Col9a1	Shmt1	Usp9x	Ppp1ca	Sec61a1	Gm27033	Psmb8	Srsf3	Car2	Dhrs4	Gng3	Kcnq1ot1		Rgs2	Prox1		Enah	Cnih2	Rhob
189	Rbfox2	Ddah2	Hmgcs2	Cct8	Selm	Knstrn	Ddit4	2300009A05Rik	Abhd12	Snrpd1	Tmem176a	Upp1	Dll3	6330403K07Rik		Ccnd1	Smim14		Svbp	Tubb3	Slc7a7
190	Nsg1	Pdgfc	Cited1	Atp5o	Dctn3	Kif22	Rps23	Saraf	Slc3a2	Meis1	Xlr4a	Gars	Fubp1	Pcolce		Mpzl1	Camk2n1		Rpl9	Slc16a10	Lrrc25
191	Nfia	Colec12	Sox4	Eny2	Vamp2	Ddx39	Pla2g12a	Exoc7	Hexb	Tmem98	Pmaip1	Ttc28	Dusp26	Kpna2		Cracr2b	Itga6		Col2a1	Atp2a2	Necap2
192	Zfos1	Pgrmc1	Gstt2	Rexo2	Pld3	Dcps	Rpl37	Ift81	Anxa3	Ddah2	Cnp	Gdi1	Akirin2	Ccnd3		Tmsb10	Tmem171		Prkra	Mllt11	Ube2l6
193	Rpl37	Col6a1	Smoc1	Cox5a	C1qtnf4	Lsm4	Larp1	Igsf1	Bin1	Ccdc34	Pla2g7	Btf3l4	Celf3	Cenph		Klf7	Mtfp1		Hmgn1	Cltb	Ifngr1
194	Smarca2	Fkbp7	Esd	Krtcap2	Prkar1a	Cox5a	Rps10	Upb1	Nrp1	Fbln1	Pxdc1	Mrpl1	Mab21l2	Lum		Mfge8	Sephs2		Lamb1	Itfg1	Arrb2
195	Lpar4	Pcolce	Dsg2	Sec61b	Fam159b	Hdac1	Rpl10a	Vimp	Sirpa	Ptma	Prr13	Ppp3ca	Smarca5	Auts2		Ushbp1	Pax4		Rps9	Gm10320	Ncf4
196	Lrp1	Nr2f2	Tkt	Hnrnpa3	Cirbp	Ppil1	Slc39a5	Klhl32	Rnase4	Rnf26	Klf6	Tpd52	Rnf121	Ezh2		Jam2	Ssr4		Atp5g2	Arx	Gas7
197	Wnt5a	Cxcl13	Hnf1b	Eif2s1	Mrfap1	Uchl3	Stt3a	Mia3	Cap1	Fxyd7	Hmha1	Fev	Dpysl2	Cdca4		Adgrl4	Ddost		Yy1	Akr1c12	Cfh
198	Rpl6	1810058I24Rik	Bag1	Cenpa	Cldn11	Anp32a	Rpl18a	Hist3h2ba	Necap2	Sae1	Hmgb2	Ptprf	2810417H13Rik	Hmgn2		Vwa1	Ifitm3		2700060E02Rik	Pgf	Pycard
199	Zfp462	Fah	Cldn8	Nhp2l1	Lrp11	Ddx39b	Rpl30	Hmgn3	Rap1b	Anapc11	Rhoh	Kdm1a	Tspan6	Nuf2		Dusp6	Gabarapl2		Rab34	Il1r1	Man2b1
200	Snhg6	Arl6ip5	Kif12	Hells	Egr1	Esd	Rpl36al	Akr1c12	Lgals1	Dnajc9	Ltb4r1	Aldh1b1	Srpk2	Meg3		Afap1l1	Cyb5b		Igsf3	Fam221a	Adgre5
201	Rps26	Amer1	Rps18	Cox7c	Pura	Adk	Clptm1l	Gmppb	Ppp1r18	Hist1h2ap	Bhlhe40	St6galnac2	Tcf12	Pmf1		Ece1	Tex30		Igf1r	Slc7a2	Hcls1
202	Tgfb1i1	Pvrl2	Sbspon	Hspa9	Atp6v1b2	Gjb1	Rps17	Lman1	Asah1	Rpp25	Ets1	Lmna	Phactr1	G2e3		Ldb2	Grhpr		Ctnnb1	Ank	Ntpcr
203	Nsa2	Fstl1	Mdfi	Fabp5	St18	Acot1	Rpl17	Defb1	Efhd2	Fam64a	Cybb	Ndrg1	Ywhae	Cbx1		N4bp3	Slc7a2		Rpl7a	Tox3	Rin2
204	Fam110b	Oat	Arl4c	G3bp1	Ank	Dcdc2a	Tspan13	Abhd2	Sh3glb1	Ywhah	Arl6ip5	Dctn3	Bend5	Gpc3		Marc2	BC023829		Arhgap5	Cxxc4	Cst3
205	Gm8186	Anxa1	Degs1	Ak2	Stxbp5l	Rnaseh2c	Vimp	Wfs1	Cmtm7	Plp2	Gimap6	B9d1	Coro1c	Unc5c		Tspan18	Prnp		Cldn9	Dst	Ptp4a3
206	Malat1	Rab34	Glo1	2010107E04Rik	Klc3	Gsr	Serf1	Atp8b1	Cd300a	Pmf1	Rgcc	Carhsp1	Jam3	Psrc1		Nrros	Pou3f4		Galk1	Usp18	Cyth4
207	Rfc1	Ifitm3	Pnrc1	Gsr	Gprasp2	Nme1	Mgst2	Rab3b	Igsf6	Cmc2	Gpr65	Epcam	Prkaca	Pttg1		Arhgap18	Tram1		Atrx	Usp51	Skap2
208	2024-09-07	Sbsn	Pfkl	Spint2	Calb1	Jun	Copz2	Tmem206	Sh3bgrl3	Ptov1	Xlr4b	Ddx6	Ube2c	Nasp		Eln	Gars		Hmgb3	Ccndbp1	Bin1
209	Rtf1	Aqp1	Col27a1	Cldn7	Gls	Rfc2	Dctpp1	Ntrk2	Abca1	Ran	Tifa	Mtfp1	Acat2	Shcbp1		Fam43a	1110012L19Rik		Rpl17	Ttll7	Ccl6
210	Eml4	Crip2	Dcbld1	Banf1	Tuba4a	Cenph	Prdx4	Adam32	Rnasel	Fxyd1	Arhgap9	Tead2	Eif4e3	Eva1b		Rras	Cxxc4		Rpl32	Slc25a53	Sh3glb1
211	Pnisr	P4ha1	Sh2d4a	Mrto4	Ngfrap1	Srsf2	Myc	Bex2	Dusp6	Tmpo	Fam111a	App	Hnrnpd	Rps12-ps3		Id1	Umps		1810058I24Rik	Tox	Slc11a1
212	Zfp503	Rspo3	Shisa5	Ssr1	Chic1	Rpa3	Atp5o	Nt5c3	Scamp2	Nid2	Sp110	Runx1t1	Wwtr1	Ndufa4l2		Fam167b	Cldn4		Tsen34	Rem2	Fam111a
213	Rps15a	Zfp36l1	Rassf9	Hsp90aa1	Spint1	Exosc8	Rps8	Gm10941	Ifi202b	Casc5	Arpc5	Mmd2	Mlf2	Kif4		C130074G19Rik	Serpinf2		Serpinh1	Ece1	Crybb1
214	Emp3	Mxra8	Hmga2	Sec61g	Insm1	Acer2	Mecom	Ush1c	Mpeg1	Sfrp2	Gnai2	Magoh	Ldhb	Casc5		S1pr1	Rrm2		Tpm1	Ncstn	Igsf6
215	Socs3	Cfl2	Spint2	Wdr77	Ankrd44	Ybx1	Rbm47	Pde10a	Aldh2	Cdkn1c	4930523C07Rik	Eif5b	Hnrnpdl	Kif20b		Podxl	Gemin6		Col9a1	Ush1c	Pou2f2
216	Lrrc17	Ptn	Ddit4l	Mrps14	Tox3	Rad51	Atp5e	Rab3d	Arrb2	Ptprd	Man2b1	Acly	Cct8	Nkx2-3		2024-09-04	Pdx1		Rps19	Cnot7	Wwp1
217	Rrbp1	Myl6	Msi2	Pdia6	Srp14	Eif4a1	Pabpc4	Vamp2	Ap2m1	Nde1	Icos	Grhpr	Cct3	St6galnac3		Cfl1	Fxyd3		Rpl10a	Dnajc24	Cybb
218	Ifi27	Mmp14	Fxyd3	Ndufa12	Pdx1	Oard1	Tob1	Slc37a4	Gpsm3	Rbm3	Irf5	Mcfd2	Cnrip1	Pid1		Kitl	Nkx6-1		Gm9493	PISD	Serinc3
219	Klf4	Cdh11	Myl12a	Snrpd1	Dusp10	Aplp2	Gnb2l1	Plpp5	Clec4a3	Mad2l1	Cxcl2	Glrx3	Rundc3a	Son		Snx3	Rap1gap2		Rps11	Enpp2	Cltc
220	Oaf	Fkbp9	Rbms3	Ung	Runx1t1	Hnrnpa1	Sephs2	Spcs1	Fam105a	Pbk	Lat2	Gck	Acot7	Col6a1		Ets2	Qdpr		Spr	Gpd2	Adipor1
221	Cnn3	Mpc2	Hax1	Atp5j	Peg3	Degs1	Cldn6	Itpkb	Capzb	Myh10	Fcgr3	Elovl1	Top1	Rad51ap1		Itgb1	Rpa3		Ptms	Ppp2r5b	Vsir
222	Epha3	Nrk	Crip2	Serf1	Cxxc4	Mcm3	Rpl37a	Ids	Pfn1	Mis18bp1	Runx3	Calm1	Cntfr	Cbx5		Cotl1	Wdr77		Tceal8	Zfp516	Arpc3
223	Rps27rt	Creb3l2	Mpc2	Pold2	Irx2	Vrk1	Gjb1	Desi1	AI607873	Usp1	Wfdc17	Drap1	Ctbp1	Ncapd2		Pnp	Rhov		Hnrnpa1	Card19	Pmaip1
224	Rpl23a-ps3	Meis1	Zfos1	Ube2i	Ace2	Lmnb1	Cd24a	Smap2	Clic1	Rrm1	Ptpn7	Serpina1b	Ppp2r2b	Snai2		Arhgap29	Ndufs6		Cyr61	Gjd2	Pepd
225	Airn	Cd34	Chmp2b	Suclg2	Anxa4	Snrpa1	Fermt1	Hsp90b1	Atp6v0b	Rpa2	Rnase6	Psma2	H3f3a	Clspn		Oaz2	Rem2		Fubp1	Baiap3	AB124611
226	Rpl36a	Ptprd	Chchd10	Ppid	Atp6v1e1	Lsm5	Rpl34	Pcp4	Limd2	Hist1h2ae	H2-Oa	Kif5b	Ywhab	Hic1		Pde2a	Cyb5r3		Knop1	Trim35	Apold1
227	Son	Atp2b1	Rassf7	Tram1	Gng12	Incenp	Rps20	Stxbp1	Gas7	Ktn1	Psmb9	Sh3bgrl3	Gsk3b	Lsm5		Slc6a6	Atp5l		Fgfr2	Atp8b1	Zeb2os
228	S100a6	Zfhx4	Emc6	Phb2	Baiap3	Ak2	Ociad2	Hip1r	Tmem106a	Flrt3	Tsc22d3	Cplx2	Ndufaf4	Lmnb1		She	Ptprn2		Mfap2	Slc7a14	Eva1a
229	Egr1	Loxl1	Fgfr3	Anp32e	Hist1h2al	Siva1	Sypl	Rbp4	Ehd1	Wwtr1	Lta	Phlda1	Ube2d1	Skp2		Cnn3	Tmem258		Ncor1	1810008I18Rik	Dnase1l3
230	Ddx21	Cpz	Sptssa	Park7	Igfbpl1	Wbp5	Syne4	Dapl1	Igfbp4	Sbspon	Akap13	Hpcal1	Fxyd1	Dbf4		Actn4	Uchl5		Igfbp2	Nagk	Uap1l1
231	Tpm4	Hoxa5	Plin3	Rrs1	Tpd52	Ldha	Rpl26	Tmem258	Cfl1	Ppp2r2b	Ctsh	Atp6v1f	Prmt1	Ilf2		Myl6	Hprt		Wnt7b	Slc35d3	Irf5
232	Cnrip1	Gata6	Fam159a	Ppia	Gck	Dnajc2	Taldo1	Camk2b	Ptprc	Tpm2	Ahcyl2	Klhdc2	Klc1	Kif11		Stmn2	Psmd12		0610012G03Rik	Insm1	Nfkbid
233	Mxra8	Slc16a3	Cdc42ep1	Ndufs6	Irx1	Mcm5	Muc1	Ripply3	Gusb	Pole3	Vasp	Col9a2	2010111I01Rik	Lsm3		Atox1	Gm15915		Arglu1	Ypel5	Slc48a1
234	Gng11	Ifitm2	Tesc	Hmgn5	Cnih2	Fbxo5	Itln1	Slc4a7	Rab5c	Hoxa5	Tnfaip8l2	H2afv	Fez1	Nfia		Vwf	Srp19		Id3	Tmem206	Tlr2
235	Postn	Fxyd7	Klf3	Mrpl17	Foxa2	Rrm1	Phlda1	Mapt	Tpp1	Ahnak	Tln1	Rbfox2	Dcun1d5	Ncam1		Rasgrp3	5330417C22Rik		Alyref	Pigk	Gm26532
236	Zfhx3	Txndc5	Peg3	Psma7	Ica1	Fjx1	Ffar2	Gpsm1	Actr3	Fras1	Gata2	Rogdi	Nasp	Ldb2		Slc29a1	2010107G23Rik		Tmem165	G6pc2	Hsd3b6
237	Ldhb	Thra	Pafah1b3	Naa50	Qdpr	Cmtm8	Echdc2	Ap3b2	Ap2a2	Fbxo5	Fth1	Hepacam2	Ahsa2	Vim		Nrarp	Chd7		Rpl13a	Gng4	Fes
238	Adamtsl1	Efemp2	Decr1	Nudcd2	Pcsk2os1	Slc2a2	Rps6	Gpd2	Bcl2a1b	Psip1	Arpc4	Txndc12	Sumo2	Esco2		Tprgl	Tcp1		Bod1	Ap3b2	Colec12
239	Rpl15	Plpp1	Ttyh1	Bckdk	Ociad2	Pamr1	Rpl13a	Gnaz	Dcxr	Hist1h1e	Cytip	Elof1	Ywhaz	Dync1i2		Pim3	Ranbp1		Smap1	Mapk15	Stard8
240	Rpl27	Nrgn	Idh2	Hint1	Map3k15	U2af1	Myo15b	Edem2	Cd48	Oxct1	Ccdc184	Rasl11b	Cxx1a	Hp1bp3		Dusp1	Matn4		Midn	Grina	Epb41
241	Dync1i2	Arl4a	Rab11a	Ddost	Ece1	Syce2	Wdtc1	Lgals3bp	H2afj	Bub3	Hs3st1	Agpat4	Ahi1	Fam212a		Dusp3	Fkbp4		Ctnnbip1	Fabp3	BC035044
242	Tanc1	Gucy1a3	Hebp1	Wdr43	Mlxipl	Prim1	Foxa3	Ndufv3	AF251705	Hdgfrp3	Was	Tecpr1	Hist3h2ba	Tenm4		Ptp4a3	Hspe1		Strn3	Tcp11	Emp3
243	Rplp1	Ifi27	Klf6	Srsf2	Edn3	Errfi1	Lgals2	Insrr	Slc7a7	Gins2	Cap1	Top1	Cep170	Rps28		Sncg	Rexo2		Acads	Gm43194	Pla2g15
244	Rpl31	Ehd2	Mbnl2	Psmb3	Rai2	Mrpl42	Dbi	2900093K20Rik	Tmem37	Map1lc3a	Dok2	Prnp	Mmd	Aspm		Eva1b	Mafb		Nsmce4a	Ocrl	Il10rb
245	Rps8	Fth1	Ech1	Cenpw	Kif21a	Uqcrb	Smim22	Celf3	Wwp1	Rspo1	Lrmp	Myef2	Eml5	Rbm4b		Rsu1	Cct7		Prmt1	Cfap20	Il4ra
246	Pmp22	Tbrg1	Col18a1	Stmn1	Klhdc8b	Snrpe	Nt5dc2	Ubl3	Tm6sf1	Gpc3	Tspan32	Sult2b1	Rbfox2	Tshz3		Srgn	Ids		Akr1cl	Dmrtc1a	Ifi202b
247	Fkbp7	Rbms1	Hnf1aos1	Akr1c13	Med28	Ncl	Hist1h2bc	Dst	Plekho1	Bnc1	Ifi27l2a	Prr13	Grina	Ubb		Serinc3	Tomm40		Adamts9	Gstz1	Cd36
248	Gm13305	Rsrp1	Srek1ip1	Edem1	Atp6v1f	G3bp1	Cmtm8	Hid1	Zeb2os	Hdgf	Ikzf1	Hmgn2	Rbms1	Fbn2		4931406P16Rik	Coa3		Smarce1		Msn
249	Rnd3	Isyna1	Slc35f5	Lsm6	Isg20	Plpp2	Mydgf	Hist1h1c	Gm2a	Rhoc	Supt4a	Pdk3	Tbcb	Fosb		Tmem252	Tmx1		Luzp1		Abca1
250	Efhd2	Hoxb7	Snx7	Gm15915	Aard	Fam89a	Manf	Trabd	Slc11a1	Rangap1	H2afj	Numbl	Fam212a	Hn1		Hdac7	Tob1		Cox19		Ctsh
251	Rdx	Mpzl1	Wapl	Eef1e1	Slc2a5	Adamts9	Gm8730	Tcta	Blvra	Efemp1	Traf3ip3	Cstb	Smarcc1	Eif2s2		Ace	Exosc5		Dcps		Apbb1ip
252	Flna	Fras1	Bphl	Ostc	Eif4a2	Snrnp40	Cope		Creg1	Oat	Samhd1	Rem2	Chd3	Pdap1		Tuba1a	Nr2f6		Phf3		Ctse
253	Sapcd1	Sptbn1	Gja1	Rfc5	Klhl7	Ppp1r1b	Suclg1		Cryba4	Myrf	Mcemp1	Spink4	Col14a1	Cmtm3		Tnfaip8l1	Gm2000		Srek1ip1		Ucp2
254	S1pr3	Arhgef25	Prdx6	Ppih	Ptbp3	Dctpp1	Bmp7		Irf5	Gmnn	Serinc3	Ttll7	Tubg1	G0s2		Hlx	Ccnd2		Msi2		Ccrl2
255	Emp1	Cd200	Plk2	U2af1	Fndc3a	Eif1ax	Rpl13		AB124611	Ptgr1	Gm8730	Kdm5b	Akap12	Ska1		Ccser2	Edem1		Ip6k2		Tbxas1
256	1810058I24Rik	Anxa3	Stt3b	Prmt1	Emc10	Asf1b	Rps27a		Ubc	Krt7	Vsir	Chic2	Gata3	Gm10076		Tek	Rps18-ps3		Wt1		Fcgr2b
257	Irf2bpl	Gm13305	Mapk13	Prdx4	Zcrb1	Rpa2	Slc38a3		Lrrc25	Odc1	Iqgap1	Kdm7a	Rhoc	Ska2		Gnb4	Afp		Pnisr		Fam212a
258	Pik3r1	Ildr2	Atox1	H3f3b	Kif12	Ppia	Ddost		Ncf1	Pfn2	Prkcd	Fam110a	Srsf9	Gjc1		Calcrl	Anpep		Hnrnpab		Ap1b1
259	Sox11	Cmtm3	Zcchc11	Ndufa5	Pnmal1	Tpi1	Gsto1		Cstb	Ngfrap1	Bcl2a1a	Lsr	Pkm	Cox4i2		Sepp1	Sphkap		Pigp		Cd302
260	Col5a1	Cdon	Lsr	Lmnb1	Kcnmb2	Rab25	Rexo2		Pou2f2	Zfp36l1	Unc93b1	Tm2d1	Cd24a	Spats2l		Itpkb	Ssbp1		Plin3		Mfsd1
261	Hoxb5	Sfr1	Palmd	Ruvbl2	Pcp4	Slc38a4	Hspa5		Bin2	Myl12a	Itm2b	Pla2g2f	Podxl2	Snrpd1		Lpar4	Ffar4		Nr2f6		Lcp2
262	Gstm5	Frem2	St14	Eif4e	Gdap1l1	Psip1	Anpep		Msn	Anp32e	Ccr6	H3f3b	Cox5a	Nrp1		Meox2	Vps37a		Auts2		Gpx3
263	Fbln1	Col18a1	Sdsl	Wfdc2	Selk	Mapk13	Cabp2		Tln1	Tubb2a	Itgb2	Serinc1	Nkain4	Rasgrp2		Tspan9	Ifrd2		Fnta		Tnfrsf11a
264	Cox6c	Kdelr3	Wwc1	Pbdc1	Hspa1b	Gc	Sostdc1		Rhog	Ybx1	Naaa	Mad2l2	Prnp	Oxct1		Thsd1	Casp6		Mcm3		Tnfrsf1a
265	Sox4	Cdc42ep2	Mboat1	Bckdhb	Atp2a2	Snx7	Ak3		Lilrb4a	Man1a2	Arhgap15	Pou3f4	Dlgap4	Ccdc88a		Bnip2	Hist1h2bc		BC005561		P2ry13
266	2024-09-02	Arf4	Igf1r	Tceb1	Rimbp2	Vdac3	Hacd1		Prdx5	Rad51	Twf2	Tprgl	Zfand5	Cdh11		Tjp1	Ostc		Tnks2		Rhog
267	Rpl23a	Col5a2	Adgrg6	Tmed10	Vps37a	Hnrnpa3	Pecr		Pdlim4	Hoxc4	Txk	Bax	Tppp3	Srrm2		Mall	Hadhb		Vps72		Plek
268	Rdh10	Cntfr	Misp	Mrpl18	2210013O21Rik	Ssb	Ndufa13		Pepd	Svbp	Evl	Fam32a	Lims2	Rnf26		Cd300lg	Gch1		Gsta4		Samhd1
269	Cygb	Ptgr1	Galm	Manf	Lysmd2	Pa2g4	Rpl14		Il10rb	Nuf2	Ctse	Plcxd3	Zfp804a	Dynll1		Txnip	Ergic2		Dapk3		Cryba4
270	Rasgrp2	S100a1	Phldb2	Nt5dc2	Tekt2	Kif20b	Rpl27a		Uap1l1	Shisa4	Gng2	Fxyd3	Psmd13	Hnrnpr		Tpm3	Usmg5		Rps13		Cdc25b
271	Ogn	Calu	Mal2	Ndufa4	Ids	Atp5b	Rpl11		Renbp	Cox6b2	Gpr171	Miat	Lama4	Rps27		Arhgef15	Gtf2a2		Hax1		Dse
272	Svil	Mmp23	Ptgds	Sdf2l1	Chmp5	Tagln2	Prr15l		Adgre5	Pln	Ckb	Pex19	Tax1bp3	Cnn3		Dlc1	Uqcrc2		Mgst1		Ifnar2
273	Gpx7	Rabac1	Cdo1	Uqcr11	Akr1c13	Myl12b	Prss8		Hpgd	Nsg1	B4galnt1	Fam20c	Rufy3	Ncapg		Itm2b	Ttc39a		Sumo3		Ssh2
274	Alkbh1	Rab33a	Rbm47	Espn	Usmg5	Hist1h2ap	Rps13		Gabarap	Net1	Cd44	Sin3b	Ppa1	Col26a1		Tax1bp3	Smarca5		Foxp1		Ebi3
275	Gm9843	Klk14	Spint1	Bmp7	Cyb5r3	Nudc	Romo1		Plek	Kif20b	Nfkbid	Il11	Phf5a	Irf2bpl		Npr1	Dst		Mia		Adap2
276	Rpl38	Pdlim4	Dync2li1	Wdr18	Rap1gap2	Laptm4b	Wfdc2		Milr1	Ube2e3	Dusp2	Polr3k	Cuedc2	Slc25a4		Csrp1	Fermt1		Mmp14		Pitpna
277	Hmgb1	Tubb2a	Gas2	Mrpl15	1700023F06Rik	Paics	Tmem147		Plac8	Pdzrn4	Rrad	Csnk1e	Fgf13	Atad2		Ccdc85b	Polr2k		Gnb2l1		Rnf13
278	Prpf4b	Pfn2	Gpx4	Dnajc2	Pla2g2f	Arpp19	Ndrg1		Lgals9	Calm2	H2afy	Fam213b	Mtch1	H2afy2		Kctd10	Dram2		Brd3		Ncf1
279	Tra2b	Ptov1	Slc6a6	Emg1	Cd164	Grb10	mt-Co1		Hprt	Msln	Plgrkt	Ube2i	Ciapin1	Brd8		Vasp	Rcan2		Dnmt3a		Milr1
280	Map1lc3a	Chd3	Vps36	Cd24a	Plcxd3	Apex1	Lrrc59		Gpr34	Sgol2a	Tnfrsf25	Spsb4	Chrna3	Nap1l1		Scarf1	Pabpc4		Igf2bp3		Raph1
281	Fkbp10	Ltbp4	Rab27b	Uqcrc1	Ppp1r1a	Pdx1	Trabd		Gdi2	Hoxb7	Ero1l	Cbfa2t2	Mrpl34	Cenpq		Heg1	Ppa1		Rpl4		Daglb
282	Rab28	Abi3bp	Trip6	Tomm20	Ush1c	Fam136a	Dbt		Serpinb6a	H3f3a	Bcl2a1d	Ciapin1	Snrpb	Asf1b		Fam212a			Igf2bp1		Casp1
283	Col4a1	Tmem176a	Tmem205	Uqcrc2	Disp2	Uhrf1	Igf1		Pitpna	Ska2	Sh3kbp1	Ginm1	Limch1	Rtf1		Fam198b			Ankrd11		Rnasel
284	Prr5	Hoxc4	Agpat2	Psma6	Fam20c	Fkbp3	Ufm1		Gbp7	Shcbp1	Jak1	Jup	Foxd3	Neil3		Col18a1			Nr2f1		Gnpda1
285	Efemp2	Cdc42ep3	Cbs	Cdc123	Slc7a14	Gar1	Rps25		Dhrs3	Cdkn3	Tnfaip3	Tm4sf4	Ppic	Phactr2		Clec1a			Acvr2b		Dusp2
286	Col8a1	Flrt3	Rab20	Txnl1	H2-Ke6	Ehf	Nme1		Stard8	Calml4	Rassf4	Chmp5	Carhsp1	Dlgap5		Lgals9			Pkn2		Vwa5a
287	Gm15050	Lhx9	Prdx2	Pabpc1	Ddc	Cnbp	Trappc6a		Ctsl	Nrep	AB124611	Tspan15	Epb41l3	Mfge8		Rab11a			Zfp326		B4galnt1
288	Adamts5	Golim4	Akr1cl	Llph	Snx15	Mdk	Ybx3		Cxcl1	Cdv3	Ppp1r18	Ubc	Ywhah	Gpx8		Myzap			Smarcd3		Gpr34
289	Col14a1	Trip6	Dstn	Tipin	Arg1	Hist1h1e	Rpn2		Gm10116	Efna1	Klhl6	BC031181	Ube2e3	Zrsr2		Ankrd37			H2afv		P2rx4
290	Sertad2	Hspb8	Hdac1	Gm10269	Hist1h1c	Nop58	Ghr		Mbnl1	Creb3l2	Gpr132	Ly6e	Ube3a	Fblim1		Ubald2			Tsn		Slc38a6
291	Hmg20b	Gbp2	Tmem116	Mrps28	5330417C22Rik	2700029M09Rik	Srm		Fam111a	Sf3b5	Fli1	Epb42	Tle4	Pbx1		Pitpna			Ttc3		Mbnl1
292	Nedd4	Vkorc1	Camk1	Gart	Gnaz	Mycn	Cox7b		Jun	Pgam1	Clec4a2	Col9a3	Cacng4	Rplp0		Clic4			Phldb2		Arhgap30
293	Eef1g	Add3	Tgm2	Aimp2	Gm5617	Psmb6	Atp5g3		Ier5	Eny2	Cfl1	Psmb1	Klhdc2	Gpc6		Ctnnbip1			Hnrnpc		Tmem8
294	Pdap1	Tspo	Dsp	Atp5f1	Gfra3	Gpx4	Bok		Sft2d1	Aspm	Fau	Cmpk1	Pls3	Hoxb5		Rhob			Ctcf		Tmem55b
295	Id3	Gsdmd	Tcf7l2	Gnpnat1	Sesn2	Cenpk	Rps18-ps3		S100a13	Ckap4	Rhog	Tpm4	Dynlrb1	Hoxa5		Klf4			Gatad1		Abca9
296	H2afy2	Gga2	Spr	Tspan13	Tgoln1	Psma4	Cox7a1		Ntpcr	Ugp2	Parvg	Hspa8	Tspan3	Zfp503		Abi3			Myl12b		Rhoh
297	Barx1	Cd248	Stard10	Ffar2	Arl3	Pcna	Dmbt1		Lmo2	Nap1l1	Fam110a	Fuca1	2700060E02Rik	Eml4		Anxa5			Cbx5		Rnf130
298	Tmem200a	Man1a2	Krtcap3	Txnl4a	Atraid	Cd9	Adamts9		Evl	Ptgis	Klrb1b	Atxn7l3b	Cenpa	Syt6		Serpina3g			Ezr		Vav1
299	Zfp36l1	Sfxn3	Gm10709	Serpinb1a	Tmc4	Psma1	Mknk1		H2-DMa	Snrpb	Csk	Prom1	Anp32b	Ckap5		Apln			Ing4		Fez2
300	Opcml	Selm	Pigp	Tubb4b	Nisch	Proser2	Rpl23		H2-K1	Serpinb1a	Prdx5	Rnf5	Trim28	Ndc80		Lrrc8c			Grb7		AF251705
301	Rps20	Skap2	Plekhb1	Etfa	Pgrmc1	Mmd2	Uck2		Runx1	Mfap2	Icam1	Arpc1a	Ina	Sumo2		Erg			Ctbp1		Lgals9
302	Cpxm1	Nkd1	Tns1	Parl	Ndufv3	Acat2	Mcfd2		Glmp	Atad2	Gadd45b	Son	Dgcr6	Hist1h4i		Trim47			Parp1		Bmp2k
303	Tcf21	Tfpi	Deb1	Dusp9	Mbnl2	Mrpl18	Epcam		Tcn2	Pdgfc	Msrb1	C2cd4b	Map2k1	Glipr2		Rhoa			Rpl3		Sla
304	Nktr	Mxd4	Gm8730	Mcm7	Gadd45b	Lockd	Gm10709		Apoc1	Anapc5	Kit	Rasgrp3	Smarcd1	Srrm1		Sult1a1			Rbm26		Hk3
305	Col23a1	Bnc1	Acaa2	Hnrnpab	Tmem59	Ndufab1	Galnt7		Gng2	Fxyd6	Lrrfip1	Ddit4	Ubald2	Prrc2c		Wasf2			Cyb5r3		Gpr65
306	Dbn1	Vdac1	Bag2	Asf1a	Uchl1	Peg3	Rpl31		Tbxas1	Igf1	Sri	Commd3	Rac1	Gm26699		Icam1			Smarcc1		Ifngr2
307	Rgs3	Atxn7l3b	Actg1	Ndufb9	Ppm1b	Chaf1b	Rps12-ps3		Rnpep	Akap12	Smpdl3a	Ppp1cb	Pcbp1	Rcsd1		Sipa1			Brd4		Tln1
308	Ubb	Elovl1	Prdx1	Rbm8a	Chmp2a	Hspe1	Hyou1		Tsc22d3	Hjurp	Rinl	Rbbp4	Sox8	Igf2r		Rac1			Rps7		Timd4
309	Marcksl1	Por	Prr13	Dynll2	Fam216a	Rbm3	Ndufb9		Arhgap30	Cenpq	Xlr4c	Dst	Qk	Oaf		Odc1			Ugt2b34		Mpeg1
310	Rplp2	Oxct1	Epb41l5	Hist1h2bc	Dohh	Pdzk1ip1	Cpox		P2rx4	Morf4l2	Adgre5	Akap9	Ctxn1	Id3		Gpr182			Sgta		Evl
311	Pdgfra	Gabarap	Nkx6-1	Psmd12	Cacna1a	Sumo2	Tmem238		Tspo	Vdac1	Tnfrsf13b	Alas1	Ywhaq	Wnt5a		Bvht			Ppp1ca		Was
312	F2r	Stk26	Sri	Cenpm	Saraf	Hmgn5	Afp		1110008F13Rik	Mmp11	Clec12a	Akirin1	Dnaja1	Lpar4		Serpinh1			Smoc2		Camk2d
313	Fam162b	Mtfr1l	Lrrfip1	Gnl3	Coa3	Stip1	Rps15		Litaf	Nrk	Pold4	Wbp5	Ppp2ca	Kif15		Cxx1b			Ckap4		Pqlc2
314	Phlda3	Arl1	Pdlim1	Rap1a	Aga	Lyar	Nans		Hck	Stub1	Zfp36l2	Bcl7a	Pja2	Rab28		Unc45b			Mllt4		Efhd2
315	Cfdp1	Idh1	Grb14	Psip1	Tmx1	Prdx6	Bckdk		Skap2	Colec12	Ebi3	Ccndbp1	Cdkn2d	Bub1		Maged2			Dcdc2a		Engase
316	Hotairm1	Tmsb4x	Cldn9	Suclg1	Pycr2	Cdk4	Fbxo16		Coro1b	Pgrmc1	Ptp4a2	Psmc5	Nt5dc2	Mdk		Gltscr2			H1fx		Anxa3
317	Igfbp3	Wwtr1	Slc38a4	Ccdc58	Ttll7	Ilf2	Ndufc1		Gpi1	Ube2e2	Myo1g	Tmx1	Eif5	Sulf2		Pltp			Eef1b2		Nrp1
318	Wisp1	Tspan3	Acads	Ssrp1	Atp6v0d1	Aldoc	1810064F22Rik		Zfp36l1	Fmod	Ptpre	Ahsa2	Rcor2	Csnk1a1		F11r			Gnb1		Tcn2
319	Ddr2	Plxdc2	Enah	Itga6	Bsg	4931406C07Rik	Ostc		Rassf4	Cntfr	Wdr1	Srsf11	Nrsn1	Pnisr		Ly6e			Btbd2		Cxcl16
320	Col6a3	Mdk	Pgm2	Ndufb8	Dnaja4	Pkm	mt-Nd5		Hfe	Cacnb3	Hspa1a	Adgrg1	Rara	Dcakd		Arpc4			Ywhaq		Ptpra
321	Flrt2	Vamp8	Wbp5	H2afx	2300009A05Rik	Bub3	Gm10260		Cdc42	Hnrnpab	Zyx	Phip	Mal	Melk		Triobp			Smc3		Cln8
322	Wdr86	Maged1	Slc39a10	Glrx5	Robo2	Lsm6	Pycr1		Ppp1r15a	Ywhaq	Capzb	Txndc9	Vbp1	Trip13		Mapk3			Dnajc2		Ptgs1
323	Rpl37a	Hacd4	Ier3	Ghitm	Txnip	Rfc3	Tcea3		Casp1	Calu	Lat	Acin1	1110008P14Rik	Tyms		Ablim1			Tenm4		Bank1
324	Nkx2-3	Apela	Ezr	Slirp	Snrpn	Hnrnpk	Dad1		Tifa	Lpl	Rgs3	Ptov1	Plekhb1	Fubp1		Bok			Top2b		Fam46c
325	Ptprs	Eif4a2	Akr1a1	Srsf1	Tmed8	Ttyh1	Prpsap1		0610012G03Rik	Ezh2	Ifi202b	Polr2c	Actl6a	Armcx2		Itga6			Mtf2		Hck
326	Zrsr2	Lox	Cdc42ep5	Vps36	Hdac6	Ncald	Herpud1		Rac1	Cdkn2d	Def6	Cirbp	Mapk10	Ddx21		Ndufa8			mt-Nd4		Pdlim4
327	Thy1	Cacnb3	Igsf3	Serbp1	Wbp2	Anp32e	Mvb12a		Stx7	Sdpr	Tpm3	Srp14	Atp6v0e2	Tra2a		Apbb2			Rab13		Ly96
328	Rpl35a	Shisa4	Hdac11	Ang	Mrps33	Col18a1	Slc26a9		Tubb2a	Arxes1	Lpxn	Naa20	Gstm5	Rrm1		Gm525			Ube2m		Tm6sf1
329	Ckap4	1500015O10Rik	Sec62	Cct4	Sod2	Ormdl2	Rcan2		Ifitm3	Smc1a	Tm6sf1	Necab2	Glipr2	Nde1		Slco2a1			Trp53		Nckap1l
330	Svbp	Use1	Stxbp6	Pno1	Grcc10	Cbx1	Lamtor2		Samhd1	Cxcl13	Rps29	Smim22	Dusp6	S1pr3		Hip1			Gna11		Txnrd2
331	Rbms1	Ugp2	Ndfip2	Rpl36al	Phyh	Hnrnpm	Tst		Rab32	Rdm1	Arl6ip1	Sf3b1	1700025G04Rik	Cox6c		Pqlc1			Hoxb4		Snx8
332	Epb41l2	Sox11	Pdcd4	Mrps10	Pop5	Rbm8a	Pcmtd1		Gltp	Ckap2	Taldo1	4833439L19Rik	Calm2	Matr3		Mast4			Eef1a1		Klhl6
333	Ptger3	Bri3	Tfg	Cdo1	Unc80	Ngfrap1	Gstt2		Ifnar2	Cdk4	Tmem173	Arpc5	Arglu1	Tead2		Fez2			Ehmt1		Lpcat2
334	Rps23	Cox6b2	Pacsin3	Akr1c12	Gprasp1	Cxadr	Rpl39		Cyfip1	Cdc42ep3	Vrk1	Rab15	Mocs2	Cdc25c		Lyl1			Gpx4		Plekho1
335	Creb5	Syngr2	Eif3h	Rheb	Cd200	Cacybp	mt-Co2		Pmaip1	Arxes2	Rorc	Nefm	Evi5	Dnajc9		Arhgdia			Gon4l		Pla2g4a
336	Penk	Flnc	Mcee	Sdhd	Usp18	Dera	Bet1		Rnf130	Col14a1	Furin	Tob1	Oxct1	Prpf4b		Fermt2			Hddc2		Sptlc2
337	Aldh2	Cd63	Mycn	Dram2	Akr1c12	Mis18bp1	Extl3		Ccdc50	Ptms	Rgs10	Rcn2	Cmtm5	Cdkn2d		Lmcd1			Epcam		Slc25a45
338	Tax1bp3	Gjb5	Cox20	Slbp	Celf4	Nrtn	Iah1		Lamtor1	Eri3	Pfkp	Rfx6	Prmt2	Ets1		Cmtm8			mt-Co3		Slc15a3
339	Rps25	Praf2	Apcs	Rpf2	Stard10	Prdx4	Ddc		Adam15	Ildr2	Il16	Enc1	Fign	Lig1		Utrn			Klf3		Myo5a
340	Loxl2	Smoc2	Txnip	Fbxo5	Prdx5	Acin1	Eif1ax		Gpr183	Hoxa7	Myo1f	Pdhb	Myl1	Diaph3		H2-Q4			Pitx2		Cd200r1
341	Lmna	Olfml3	Il17re	Tpd52	Itfg1	Tcp1	Rap1gapos		Fam212a	Frem2	Gm10260	Eif1	Cct7	Col4a1		Mecom			Degs1		Ptpre
342	Angptl2	Ssbp2	Ddt	Aars	Gm561	Fermt1	Bckdhb		Erp29	Lsm5	Cd4	Pfdn4	Arhgdia	Dnajc8		Actg1			Bnip3l		Ier5
343	Rcsd1	Id3	Cgn	Rhov	Rab37	Ube2i	Cmtm4		Il6ra	Cenph	Gltp	Atp5l	Rab6a	Zfhx3		Tcn2			Gjc1		Bcl2a1b
344	Gas1	Eri3	Kcnn4	Cdca3	Ddx5	Itgb3bp	Spdef		Lipa	Fkbp9	Dock2	Bpnt1	Celf2	Ifitm1		Sox7			Nradd		Ms4a4c
345	Calu	mt-Nd1	2510002D24Rik	Ccnb2	Ctsz	Nup37	Rps16		Atp2b1	Cbx5	Igsf6	Prkar1a	Frmd4a	Rhno1		Pde4b			Ttc14		Bin2
346	Fam212a	Wisp1	Scpep1	Psmb2	Tmed4	Kif20a	Hsp90b1		Ptbp3	H1fx	Cd160	Psmc4	Sox2	Dnmt1		Cd47			Mcm4		Syk
347	Sox6	Hoxb2	Lamb1	Wdr61	Efcab10	Tfg	Grhpr		Ebi3	Fkbp10	Cd14	Marcks	Prdx6	Spry1		Bst2			Cdc26		Rab8b
348	Vcan	Ilvbl	Ildr1	Rpl5	Atp6v0e2	Ppih	Tpd52		Ly96	Rcn1	St8sia4	Acer2	Anp32e	Kifap3		Ppp1r15a			Egln2		Psmb8
349	Nfatc4	Mmp16	Lifr	Brcc3	Apbb1	Hrsp12	Comtd1		Vamp8	1810058I24Rik	Hk2	Vps37b	Top2a	Marcksl1		Dll4			Rpl12		Itga9
350	Eef1a1	Rarb	Ocln	Psmb6	Pja2	Hnrnpd	Hid1		Wdr1	Atp2b1	Tapbp	Ube2v2	Mest	Rps29		Cox7a2l			Chd4		P2ry12
351	Srrm2	Sdc2	Car8	Lman2	Rock1	Psmc3	Amy2a2		Atp1b3	Slc25a4	Slc3a2	Mtch2	Eid1	Sf3b5		Kcne3			B230219D22Rik		Tifab
352	Cyp20a1	Gpx7	Nr5a2	Hmgn1	Gclm	Nudt21	Suclg2		Tmem55b	Nenf	Csf2rb	Snw1	Vgll4	Cit		Asb4			Jund		Tlr7
353	Sf3b5	Zbtb7c	Fjx1	Hmgb3	Napa	Ewsr1	Gmppb		Arl6ip1	Fam204a	Itm2c	Stip1	Ccne1	Gas1		Ddah1			Sf3b2		Nhlrc3
354	Wasf2	Cmbl	Gpt2	Gmps	Tmem163	Dpy30	Gata4		Atp6ap2	Rfc1	Mpeg1	Atp6v1e1	Atat1	Hnrnpa1		Rab5c			Bcl11a		Prkcd
355	Armcx2	Acaa2	Mapk3	Idh3a	Tspan8	Ywhaq	Nop10		Atp6v1b2	Tspan6	Tsc22d4	Dnajc7	Clvs1	Lrrc17		Gng2			Rps3a1		Entpd1
356	Nefl	Slc48a1	Map1lc3b	Mrpl13	Rab3b	Psmc5	Mrps24		Rnf13	Rnf187	Mpc1	Ergic2	Mrpl20	Ptger3		Prelid1			Smarca5		Rhd
357	Adamts2	Armcx1	Mpst	Eif3g	Ppp1r37	Aes	Cyb5b		Rbfa	Gata6	Lyn	H3f3a	Ddx5	Sae1		Entpd1			Cuedc1		Pxdc1
358	Rpl9	Ckap4	Ndufa6	Cldn6	Hspa4l	Gm37350	Chid1		Fuca1	Pvrl2	Aldoa	Rala	Rtn3	St13		Tm6sf1			Mycbp2		Gngt2
359	Ctsk	Nnat	Abcc3	Ebna1bp2	Gpr119	Acsl5	Anapc13		Rap1a	Mgp	Tnfaip8	Arx	Palm	Dtl		Palmd			Pcm1		Fuca2
360	Rab34	Serpinf1	Adi1	Eif5	1810037I17Rik	Psma3	Rpl21		Was	Dtymk	Osm	Mycbp2	Eef1a1	Sf3b2		Arl6ip5			Zfp36l1		Mylip
361	Mmp14	Gstm2	Dcps	Prss23	Elof1	Fbl	Ctage5		Tnfrsf1a	Arl1	Tmem123	Vps72	Soga3	Tcof1		Gm13889			Zfp91		Abcg3
362	Ndufaf2	App	Hyal2	Cct5	Atp6v1g1	Tpm3	Perp		Myo5a	Tmem88	Smc4	Ldb1	Mapre1	Mns1		Lrrfip1			Otub1		Metrnl
363	Taf1d	Arid4b	Cd2ap	Ruvbl1	Zwint	C1qbp	Nup62cl		Cd36	Syce2	Ifi203	Sumo2	March5	Smarca2		Rgl2			Cirbp		Cd79b
364	Eif5b	Dhrs7	Oxa1l	Ppil1	Ppp2r5b	Serbp1	Rps26		Arhgdia	Efemp2	Ctla2a	Zcrb1	Map2k2	Mmp2		Ddah2			Rps15		Acp2
365	Plxdc2	Tgfb3	Sema3c	Uqcr10	Rab27a	Gcsh	2010107E04Rik		Pnp	Rab34	Arhgef6	Myt1	Smarca4	Kifc1		Ywhab			Ube2e2		Ehbp1l1
366	Adprh	Timp1	St3gal5	Elavl1	Fxyd6	Pfn1	Tmed10		Timd4	Trim59	Vav1	Gnptg	Dut	Dbn1		Ctnnb1			Eri3		Nagpa
367	Eef2	Nedd4	Acot13	Fam195a	Akap17b	Ndfip2	Smim6		Myo1f	Sumo1	Fmnl1	Hnrnpa1	Hnrnpk	Utp3		Ramp3			Cdc42ep5		BC028528
368	Ptgis	Arxes1	Map3k1	Mphosph10	H2-D1	Nr2f6	Gm10076		Rhoa	Cnn3	S1pr4	Fndc3a	Nedd4	Rbms1		Fstl1			Plpp2		Samsn1
369	Rps24	Serf2	Cpne8	Bzw1	1810008I18Rik	Srsf6	Uqcr10		Apbb1ip	Tbrg1	Cd84	Cldn4	Efna5	Cenpn		Plscr2			Krt8		Zeb2
370	Top1	Efna5	Naca	Bok	Map9	Pfdn1	Eef1d		Csf2ra	Rprm	Runx1	Ivd	Npdc1	Dnm3os		Ifi203			Mapk13		Rassf5
371	Gm11808	Net1	Fabp3	Magohb	Smim14	Rbx1	Asl		Mfsd1	Ptgds	Nfkb2	Pick1	U2af1	Ttc3		Ppfibp1			Wbp1		Il21r
372	Ramp2	Echs1	Onecut1	Smarca5	Atp8b1	Gtf3c6	Pigf		Twf2	Sumo2	Cyth4	mt-Co1	Rala	Tpm1		Ptpn18			Traf4		Spic
373	Golga7	Tceal8	Etl4	Shmt2	Gpd2	1810037I17Rik			Gm26522	Slc16a3	Grap	Polr2k	H2afy	Smarcc1		Ctnna1			Suds3		Rab32
374	Cthrc1	Camk1	Papss1	Hnrnpf	Calm2	Esco2			Nfkbid	Nkain4	Mndal	Btg1	Cyp2j6	Flna		Anxa6			Fis1		Gpsm3
375	Efnb1	Yif1a	Acadvl	Gsto1	Hcfc1r1	Prpf40a			Ethe1	Ssna1	Fam96a	Smarca4	Dnajc9	Zfp462		Amotl1			Psmb1		Slc7a8
376	Fat4	Ndufa4l2	Emp2	Ccdc34	Gpc4	Mrps36			Picalm	Cdca2	Csrnp1	Ccnl2	Shisa4	Tcf12		Tspan15			Emc6		Hbq1a
377	Capn6	Ogt	S100a16	Mrpl50	Fam213a	St3gal4			Ralb	Rad51ap1	Nrm	Haus7	Ctnnbip1	Cxcl12		Junb			Scand1		Srgn
378	Fus	Cnn3	Rps27	Fermt1	Bax	0610040J01Rik			Ctla2b	Pfdn6	Nfkb1	Pafah1b2	Set	Rnf7		Plekho1			Smim19		Gm6377
379	Rps17	C1qtnf4	Mxra7	Psmd14	Entpd3	Phb2			Capg	Hoxc5	Arl5c	Aplp2	Ddx39b	Anln		Adipor1			Cd24a		Ripk1
380	Gm266	Crtap	Usp3	Ndufa9	Gabarapl1	Tm9sf3			Il4ra	Rnf7	Hnrnpf	Tceb1	Fus	Rcn3		Hey1			Ncald		Gsdmd
381	Cd302	Crabp2	Notch2	Polr3k	Pam16	Psmd14			Nfe2l2	Hlx	Oaz1	Snx15	Oaz2	Thrap3		Lims2			Usp34		Reps2
382	Tfpi	Tex264	Knop1	Mycbp	Tmem59l	Txn1			Akr1a1	S100a11	Sash3	Isl1	Arvcf	Smad5		Ywhah			Phpt1		Myo1f
383	Mmp16	Tmem150a	Cyb5r3	Lin37	Fgd2	Ube2n			Shisa5	P4ha1	Pdcd1	Psmc6	Smc2	Cd248		Actb			Ube3a		Mgl2
384	Oaz2	Grina	Pnrc2	Ccna2	Rem2	Bag2			Ifngr2	Slc1a3	Gm26532	Chmp4b	Ccdc124	Nsg1		Thbd			Baz1b		Csf2rb
385	Tnrc6a	Tmed9	Gm14226	Snrnp40	Slc25a53	Mboat1			Atp6v1g1	mt-Nd1	Chil1	Slc25a11	Tubb2a	Snrpc		Cyb5a			Rbbp7		Lrp1
386	Cbx3	Gcsh	Ap1m2	Ndufb6	Map2	Rassf10			Ptgs1	Lgals7	Ly86	Shfm1	Smarcb1	Tcf21		Prkch			Rpl19		Gpr137b
387	Csnk1a1	Arid5b	Fdx1	Hmga2	Tmed10	Ppp1cc			Gngt2	Stk26	Fnbp1	Hnrnpk	Col25a1	Fzr1		Arap3			Rpl28		Tifa
388	Ntrk2	Zfhx3	Actr3	Bola1	Npepl1	Rbmxl1			Gpr65	Ilf2	Taok3	Cox7a2l	Top2b	Nsa2		Sepw1			Cdh3		Ctla2b
389	Copz2	Fam204a	Polr2m	Tuba1b	Prox1	Tsen15			Fes	Mcm5	H2-T23	Rasd1	Sh3glb1	Ppig		Luzp1			Idh3b		Gba
390	Amotl1	Akr1b8	Mrpl24	Chac2	Arpc1a	Hist1h2ae			Raph1	Arf4	Actr2	Nt5c2	Tubb4a	Zcwpw1		Rgs3			Svil		RP23-81F19.2
391	Laptm4a	Celf2	Cd14	Rpl27-ps3	Fam92b	Snrpb			Ms4a4c	Phgdh	Pitpna	Psmd10	Xist	Rbm3		Ahnak			Rpl11		Lgals1
392	Rpl36-ps3	Eid1	Stbd1	Chchd1	0610009B22Rik	Casc5			Tpm3	Hnrnpa1	Rap1a	Hagh	Eif3f	Rps21		Pfn1			Afm		Cryl1
393	Nme4	Ctxn1	Sestd1	Metap2	Fam174b	Hsp90ab1			AI413582	Rfc5	Batf3	Cript	Bex2	Tac2		Psmb8			Pink1		Ophn1
394	Pofut2	Mrrf	Nfe2l2	Tmed3	Bend7	Prox1			Ap1b1	Gde1	Gltscr2	Dll3	Mthfd2	Rad21		Rftn1			Basp1		Atp8a1
395	Tra2a	Nfic	Ninj1	Stra13	Wdr6	Nop56			Slc9a9	Hoxb2	Ms4a4c	Insig2	Ola1	Mex3a		Tspan4			Cldn7		Rgs1
396	Notch2	Col5a1	Nr2f6	Ndufv2	Cnot7	Spr			Twf1	Cbx1	Sh3bp1	Map1lc3b	Ptma	Supt16		Lrrc58			Hnrnpr		Rec114
397	Nap1l1	Tiparp	Stxbp2	Car9	Rabac1	2810004N23Rik			Ssh2	Trip13	Oser1	Map2k1	Plekho1	Hoxb2		Klhl4			Pdx1		Pik3cg
398	Smad5	Loxl2	Adh5	Sarnp	Upb1	Snrpd2			Serp1	Sfr1	Ecm1	Cd164	Tead2	Stag1		Bik			Rcn1		Osbpl11
399	Fbln5	Myh8	Pdgfa	Srsf6	Cbarp	Clspn			Atp6ap1	Tfdp2	Lcp2	Chchd2	Psmb5	Chd4		Degs1			Map1lc3b		Arhgap25
400	Fgfr1	Acat1	Ctnnb1	Atic	Ier2	Psma2			Cd302	Uhrf1	BC035044	Efcab1	Eef2	Tnrc6a		Parvb			Senp6		Gimap6
401	Pth1r	Hoxb4	2610528J11Rik	Sub1	Tuba1a	Psma7			Fam174a	Acat1	Ly9	Tmbim1	Khdrbs1	Col6a2		Hmg20b			Mpped2		Trim10
402	Nav1	Myh10	Bre	Sfxn1	Ncam1	Mrpl12			Nfkbiz	Amer1	Il1rl1	Dync1i2	Ret	Gpx7		Cdipt			Acin1		Dhrs3
403	Ptk7	Klf5	Maff	Acp1	Zfp36	Snrpd3			Cd84	Rnaseh2c	Vps37b	Kras	Cald1	Zfp326		Klf13			Ppp1r14b		Rgl1
404	Rps10	Zfyve21	Pcbd1	Pfdn6	Mrpl57	Gmps			Atp6v0d1	Arl2	Psmb10	Safb	mt-Nd1	Wbp11		Nck1			Esd
405	Tbx3os1	Siva1	Fkbp4	Fam49b	Prkacb	Cdh1			Pold4	Thra	Rilpl2	Timm17a	Pdlim1	Ahnak		Arl4a			Tcf3
406	Kdelr3	Gabarapl1	Rbpms	Nop16	Ndufaf3	Hspa9			Fgd2	Wbp5	Ncf1	Tbpl1	Hist1h1b	Fam133b		Ltbr			Ddb1
407	Jag1	Nfia	Serpinf1	Nr0b2	Tmx4	Cfi			Pid1	Slbp	Rel	Taldo1	Gng11	Larp7		Hspa12b			Rpl27a
408	Eif2s2	Oaz2	Ypel2	Cdk2ap2	BC023829	Txnl1			Crybb1	Cdc25c	Lyl1	Rnf6	Srpk1	Rbm28		Rab13			Pvrl2
409	Rpl41	Il18	Gltscr2	Gspt1	Yipf4	Mdfi			Rbpj	Zfhx4	Eif1	Dctn2	Srsf11	Pdcd5		Fam174b			Lamtor5
410	Cd34	Stmn1	Bcap31	Exosc5	Eif1b	Gm10093			Vav1	Tspan3	Tnni2	Ei24	Tmod2	Zfp36l1		Cdc42			Anapc16
411	Rpl23	Plec	Jup	Nars	Manf	Knop1			Dusp2	Phf5a	Fes	Arid4b	Abracl	Epb41l2		Ltbp4			Zfp703
412	Rps18	Procr	Eci1	Haus1	Ccdc28b	Srek1ip1			Lpcat2	Sfpq	Dbnl	Jkamp	Sumo1	Taf1d		Lrrc8a			Zfp428
413	Prrc2c	Zbtb8a	Abhd11	Mlec	Tpst2	Nap1l1			Slc15a3	Atg3	St6galnac3	Hdac1	Rap2b	Cep295		Sptan1			Bag2
414	Spry1	Sema3d	Csrp1	Smn1	Meg3	Srsf1			Lamp2	Tpm4	Cdc42	Eif4g2	Mtch2	Lims1		Pvrl2			Fxyd6
415	Pde3a	Frmd4b	Kxd1	Rps2	Trappc6b	Sfpq			Rin2	Mpzl1	Dapp1	Snrnp27	Clec14a	Rpl35		Cds2			Dnttip1
416	Cxx1a	Zfp503	Cdkn1a	Stoml2	Tubb3	Mrps25			Fli1	Dnph1	Tspan13	Tmem206	Tmem121	Snrpf		Wdr1			Poldip2
417	Dcakd	Ift43	Eif3f	Afp	Phip	Txnl4a			Khk	Hnrnpd	Relb	Ptprn2	Hmx3	Col5a2		Rbms1			Col1a2
418	Col9a2	F11r	Galk1	Psma3	BC031181	Ppa2			Sla	Cd151	Gimap5	Ccng2	Kdm1a	Rps12		Rbpms			Chd1
419	Zcchc9	Tmem132a	Gm10093	Dnajc9	Ccnt2	Smarca5			1600014C10Rik	Fstl1	Cdk2ap2	D930028M14Rik	Tsg101	Ptprs		Ripply3			Oxa1l
420	Mgp	Iscu	St3gal6	Pcna	2610524H06Rik	Fen1			Prkcd	Plagl1	Acap1	Csnk1a1	Tpgs2	Rhoc		Upp1			Trim27
421	Ogt	Ehd1	Clic6	Foxa3	Tmem107	Smc3			Tlr2	Fkbp7	Arrb2	Selk	Apex1	Zbed3		Dgkz			Igf2bp2
422	Ets1	Slc1a3	Crot	Rrp15	Pclo	Dynlt1f			Colec12	Eln	Sp140	Tes	Ccnjl	Adprh		Nudt4			Fkbp8
423	Col4a2	Rdh14	Myl6	Nfyb	Hist1h2bc	Nmral1			Daglb	Ndc80	Hexb	Hdac2	Ube2n	F2r		Stard4			Slc25a3
424	Ank3	Syne2	Aig1	Eif3m	Cox14	Tesc			Fam49b	Cd82	Podnl1	Rab3d	Insc	Brd9		Cd38			Ube2e3
425	Eif3j1	Leprot	Kdf1	Eif4ebp1	Usp29	Zfp637			Brk1	Smc6	Capza1	Ap3s1	Rsrc2	Cdk11b		Fzd4			Rbms1
426	Nkd1	H2afy2	Atxn10	Hnrnpa1	Fam122a	Prrc2c			Nckap1l	Rbm28	Mef2c	Rgs16	Rgs4	Cdk5rap2		Tubb6			Arrdc1
427	Tns3	Ahnak2	Nedd4	Eif1a	Gng4	Bre			Tnfrsf13b	Gpx7	Nfkbie	March5	Lsm2	Smc6		Nfkbia			Nono
428	Angptl4	Rbms2	Tagln2	1110001J03Rik	Slc35g2	Cystm1			Cebpb	Dbf4	Nt5c	PISD	Snrpb2	Sms		Acot9			2310036O22Rik
429	Tcf12	Nab2	Kansl1l	Rad51	Asb4	Tomm40			Trim30a	Psrc1	Nfkbiz	Atp6v1d	Pdlim7	Brd3		Tfpi			Tspan4
430	Snrpb2	Sesn3	Pkd2	Ndufc1	Mapk8ip2	Sumo3			Use1	Txndc5	Fam107b	Kif12	Shfm1	H1f0		Homer3			Stx16
431	Dnm3os	Sult5a1	0610011F06Rik	Ctrb1	Atp5e	Rassf7			Casp8	Ncapg	Inpp5d	Gm5900	Map1lc3a	Col4a2		Orai1			Rps16
432	Anxa6	Rpl22l1	Trappc6a	Uqcrq	Syt5	Lsr			Cd33	Mcm7	Zc3hav1	Timm8b	Slc25a5	Cops8		Ifngr1			Ssbp2
433	Sh3bgrl	Npdc1	Ctnna1	Tmpo	Wnt4	Slc28a3			Tifab	Ptges3	Asf1b	Cmip	Ptpn1	Tmpo		Prrg3			Fus
434	Abcc9	Metrnl	Bnip3l	Ptges3	Ginm1	Orc6			Tnf	Gucy1a3	Birc3	2310022B05Rik	Dctn2	Tanc1		Myo1c			Oaf
435	mt-Nd3	Card19	Ormdl2	Syngr2	Nudt11	Spon1			Sp110	Kif15	Tnfrsf18	Rsad2	Hspa8	Maged2		Tmod3			Zfp292
436	Rem1	Plxna4	Igbp1	Pmf1	Sult1d1	Smoc1			Lcp2	Add3	Socs1	Gtf2b	Fbxo7	Ckap4		Plcb1			Snw1
437	Htra1	Ankrd12	Hibadh	Cym	Cpn1	Tmed1			Cln8	Prss23	Gyg	Gtf2e2	Adam23	Slc43a3		Ssu72			Atp5d
438	Ddx24	Cyb5a	Hbegf	Rpa2	Il1r1	Mrps28			Epn1	P3h1	Rftn1	Mycl	Rwdd1	Ptges3		Gimap9			Khdrbs1
439	Tsc22d1	Plin3	Paics	Erp44	Ang	Elavl1			Stk17b	Ppih	Tmsb10	Scly	Fam198b	Ssrp1		Bmpr2			Dpf2
440	Tnfaip8	Hdgfrp3	Sypl	Canx	Fam174a	Arl4c			Psmb9	2810474O19Rik	Dll1	Tff2	Smarce1	2024-09-04		Mef2a			Tspan3
441	Fam178a	Sdc4	Rpl17	Dhfr	Enho	Dstn			Hsd17b12	Cdt1	Trpv2	Tmem176b	Lgals1	Smchd1		Sod1			Tia1
442	Rps3a1	Plagl1	Acaa1a	Dek	Vdr	Psmc6			Egr1	Dctpp1	Hilpda	Pcbp2	Mettl9	Eif3j1		Capns1			Ift43
443	Snhg12	Prph	Pyurf	Hmmr	Cfap20	Ckap2l			Arhgap9	Clic1	Amica1	Slmo2	Mif	Trim59		Tsc22d3			Fam110b
444	Rpl22	Mpped2	Elovl7	Chchd4	Ap3b2	Dcbld1			Gnpda1	Higd1a	Cxcr4	Tax1bp1	Alyref	2024-09-02		Tmem47			Tmed1
445	Fam133b	Arxes2	Rab3ip	Nup62cl	Gfpt1	Tnfrsf12a			Ifi204	Asf1b	Lilrb4a	Zfand5	Psmd8	Snrpb2		Myo1b			Snhg12
446	Kazald1	Pgam1	Ppdpf	Hnrnpl	H2-Q2	Sf3b1			Samsn1	Smarcd3	Tox2	Atp6ap1	Nono	Plk4		Lama4			Acat2
447	Rps15	Trmt112	Hint2	Fcf1	Clcn3	Smu1			Pgd	Cep55	Diaph1	Eif4a1	Fbln5	1110004F10Rik		Btbd3			Ythdf2
448	Kdelr2	Pmm1	Ggt1	Top2a	Pde10a	Park7			Actr2	Parp1	Lbr	Ube2d2a	Cyth2	Cfdp1		Ppia			Atp5a1
449	Ifitm2	Ikbip	2900026A02Rik	Rnaseh2a	Fxyd3	Psmb2			Wasf2	Tceb2	Dock10	Wbp2	Lima1	Arhgap11a		Pls3			Smad7
450	Acat2	Snhg18	Acer2	Rnaseh2c	Riiad1	Nr4a1			Marcks	Yif1b	Rps27	Bag1	Mex3a	Ndufaf2		Col13a1			Trip12
451	Dpysl2	Tmem109	H3f3b	Cbs	Mboat4	Psmc4			Grap	Dhfr	Ssh2	Lhx1os	Birc5	Serbp1		Rgl1			Cnn3
452	Rps27a	Ttc3	Comt	Cmtm8	Rnaset2a	Psmd12			Metrnl	Tmsb4x	Pabpc1	Upk3bl	Clip3	Ptma		Crim1			Prdx6
453	Rps5	Rbm28	Dynlt3	Gm10260	Ahi1	Erich5			Hk3	Tceal8	Rbm38	Megf11	Psmc4	Sapcd1		Nes			Gapdh
454	Kif26b	Hlx	Hipk2	Carnmt1	Atp6ap1	Ncapg			Camk1	Sptbn1	Sp100	1110004F10Rik	Nhp2	Hnrnph1		Nid1			Slc25a4
455	Rpl13	Calr	Rpl10a	Farsb	Cmip	Melk			Atp13a2	Gapdh	Tap2	Ubb	Tsn	Igf2bp1		Rassf1			Tcp1
456	Adgra2	Gstm5	Fam136a	Dars	Ly6h	Tmbim6			Qk	Fus	Ctsz	Rhobtb3	Zfp207	Mapre1		Leprot			Frrs1
457	Iqgap2	Smarcd3	Dera	Hadhb	App	Trim28			Tsc22d4	Epha3	Rab37	Josd2	Snap25	Emp3		9430020K01Rik			Higd2a
458	Oxct1	Gde1	Cxxc5	Psma1	Abcd3	Raly			Capza1	Erh	Siglecg	Syce2	Gpr17	Mir143hg		Casp8			Smim1
459	Dtl	Hotairm1	Lamc1	Cox7a1	Arpc5l	Hnrnpu			Syngr2	Hand2	1600014C10Rik	Fam103a1	L1cam	Rpl23a-ps3		Fgd5			Mpnd
460	Hnrnpdl	Pln	Syne2	Mrpl28	Serinc1	Kif2c			Comt	Dag1	Ptpn22	Zfp703	Psmb7	Rbm39		Fam13c			Nudt16l1
461	Tcof1	Zfp771	F3	Tmem167	Npas4	Cdc123			Ptpn1	Hmg20b	Top2a	Med28	Pfdn4	Nedd4		Imp3			Luc7l2
462	Rpl34	Lrrc42	Zfand6	Nudt5	Minos1	Ndufs6			Vps26a	Rfc4	Clec10a	Trappc2l	Ranbp1	Rbfox2		Qk			Cox7a2l
463	Gypc	Bnc2	Agt	Mrps24	Auh	Psmd7			BC035044	Melk	Ptges	Mospd1	Tdrkh	Hist1h2ag		F2r			mt-Cytb
464	Tcf7l2	Pddc1	Shank2	Cpox	Tmem30a	Akr1cl			Ier2	Sbsn	Aldh2	Psmd11	Bzw2	Rsrc2		Klhl6			Cfdp1
465	Ddx18	Ifi27l2a	Fgfr4	Snrpe	Tcta	Med19			Rilpl2	G3bp1	Gimap9	Cog1	Cisd1	Oaz2		Uaca			Efemp2
466	Limd2	Pdgfa	Pld1	Usmg5	Dmrtc1a	Sdc1			Gpx3	Hnrnpdl	Plaur	Ndufa11	Impdh2	Mat2a		Btg1			Slc9a3r1
467	Nhsl2	Krt14	Ube2b	Rbm47	Folr1	Rps18-ps3			Tmem261	Marcksl1	Eef2k	Sumo1	Bud31	Rps26-ps1		Dock6			Agpat2
468	Rpl21	Car11	Vegfa	Sdhb	Mtmr7	Tmx2			Lpl	Cpz	Tnip1	Ypel5	Pdap1	Nsmce2		Dab2ip			Cers4
469	Mcc	Hoxb6	Lrrc16a	Nsun2	Prkar1b	Thoc3			Arid3a	Mrpl51	Lgals9	Hmgn5	Fkbp3	Epha3		Mdfi			Mrpl49
470	Dnm3	Cyp2d22	Nfib	Mthfd1	Kif5b	Tsen34			Hmox2	Clspn	Stxbp2	Cbx1	Cdh19	Lrp1		Sypl			Map2k2
471	Ubap2l	Neo1	Urah	Ssb	Ubl5	Misp			Tmem50a	Lrrc42	Capza2	Tmem33	2024-09-06	Wasf2		Mpp1			Nt5c3b
472	Stbd1	Pgm5	Fam149a	Nit2	Cbx6	Dnajc15			Rps29	Cenpk	Rassf5	Nisch	Tubb6	Smc3		Smad7			Flywch2
473	Ugdh	Tnfrsf11b	Eci2	Gng5	Sqstm1	Psmd2			Cd79b	Arl4a	Psme2	Nrtn	Eif4g2	Pdgfra		Ppp1r16b			Bptf
474	P3h3	Serpinb6a	9130008F23Rik	Mrps18c	Ndst4	Alyref			Nagpa	Diaph3	Pstpip1	Atg3	Ak6	Pik3r1		March2			Vdac3
475	Rpl26	Aldoa	Tpi1	Fam96b	Serpina10	Vdac2			Tmem141	Golim4	Cldnd1	Actr10	Klf7	Phf5a		AY036118			Man1a2
476	Rab13	Palld	Mrpl52	Smc2	Nagk	Polr2m			Ehbp1l1	Cpxm1	Clk1	Ccdc8	Cenpf	Fam178a		Ldha			Crebbp
477	Ndufa3	Jam3	Syngr1	Idh2	Mtfp1	Bag1			Cbr2	Wrb	Tnf	Slc29a1	Gnb1	Pde3a		Cenpa			Dlgap4
478	St13	B4gat1	Tmem9	Lman1	Desi1	Aimp2			Smap2	Hoxb4	Arhgap25	Zfp451	Igf2bp1	Cdc26		Ackr1			Fermt1
479	Smarcc1	Dag1	Rpl3	Mrpl34	Deptor	Cct3			Zfp36l2	Rfc2	Gm10709	Uqcrfs1	Nop56	Postn		Reep3			Ptn
480	Nudcd3	Nt5c3b	Tmed4	Adk	Kif1a	Dazap1			Celf2	Exosc8	Gnb4	Zfp664	Sox5	Fus		Tmem109			Actg1
481	Bloc1s1	Smo	Zfand1	Pdia4	Dpysl2	Uqcrc1			Adap2	Kdelr3	Dusp5	Tox	Cdca8	Cenpl		Dysf			Dag1
482	Cox4i2	Akt1s1	Adamts16	Clps	Drc1	Ndufb7			Slc48a1	Fah	Tifab	Fam96b	Clns1a	Mad2l1		Iqgap1			Ak2
483	Clmp	Ergic3	Tle2	Rpl22l1	Foxp1	Rpp21			Tmem9b	Cdh11	Uhrf2	Slc31a1	Vdac3	Ncaph		Sdcbp			H2afy
484	Pdlim7	Acp5	Ndufa13	Ndufs3	Ubn2	Cyc1			Pxdc1	Cdca4	Rbl2	Asf1a	Rbm3	Jag1		Sri			F11r
485	Rlim	Adgrg2	Ank3	Gtf2a2	Ndufa6	Ska1			Rab8b	Atxn7l3b	Ifrd1	Tmem184c	Dazap1	Cntrl		App			Rps10
486	Ssbp3	Hoxc5	Borcs8	Mdh2	Amigo2	Emg1			Apobec1	Col18a1	Atox1	Riok3	Nhp2l1	Sertad2		Exoc3l			Hmgcs2
487	Tsc22d3	Fndc1	Elf3	Uhrf1	Ucp2	Ppp4c			Il21r	Polr2m	Itgal	Eps8l2	Nradd	Tax1bp3		Tspan12			Paics
488	Cdh2	P4ha2	Prkra	Tst	Tceal1	Mrps14			Rab7	Loxl1	Milr1	Hsbp1	Gdpd1	Anapc11		Foxo1			Rps15a
489	Rbm39	Hoxb8	Tjp3	Syncrip	Tmem184a	Hdgf			Mcl1	Nnat	Unc119	Prkrip1	Opcml	H3f3a		Map4			Arf6
490	Dpysl3	Sema3c	P4ha3	Rps6	Ndufb2	Mis18a			Gm26532	Timp2	Myh9	Tgfbr1	Matr3	Htra3		Sh3bgrl			Ccdc90b
491	Gm10263	Ormdl3	Snhg6	Tsfm	Gnb2	Cdca2			Rgl1	Depdc1a	Pira2	Cct5	Bax	Fam111a		Wwtr1			Srrm2
492	Gjc1	Dtx3	Atp6v1f	Sypl	Ppp1cb	Wnt7b			Iqgap1	Ifitm1	Gm26740	Alg2	Nedd8	Nfatc4		Mtdh
493	Rcn2	Creb3l1	Lama5	Psma2	Cadps	Tpr			AI662270	Dtl	Icam2	Qsox1	Ddah1	Atxn7l3b		Dusp2
494	Brd9	Mpzl2	Lpar6	Nr5a2	Stxbp1	Etfa			Prcp	Kifc1	Tmed5	Zfp358	Phax	Tia1		Ifi35
495	Dkk2	Ube2l6	Pigyl	Esf1	Cfap36	Nol7			Sqrdl	Rad21	Cst7	Wrap73	Hnrnpc	Hist1h4d		Fmnl3
496	Mir143hg	Zyx	Tonsl	Mrpl21	Inafm1	Hax1			Rsu1	Klk10	Skap2	Bud31	Spag9	Hdgfrp3		Chst15
497	Plat	Arhgap10	Higd2a	Cdk4	2900093K20Rik	Galk1			Slco2b1	Cldn15	Ethe1	Fam204a	Cbx5	2610318N02Rik		Sft2d1
498	Nrep	Hoxa7	2010107G23Rik	Eef1d	Ndufb11	Acadm			Slc25a45	Hoxb6	Irf2	Sphk1	Pkig	Bcl11a		Il6st
499	Tns1	Anxa11	Gstt3	Rpl7l1	Igsf8	Cct4			Adipor1	Mbd3	Pak1	Uqcr10	Chic2	Rpgrip1		Dynll1
500	Rpl36	Ilk	Chmp4c	Akap7	Tcp11	Pfkl			Pla2g15	Nab2	Gimap4	Coa3	Dst	Tbx2		Filip1l
501	Cep164	Creg1	Asl	Hnrnpm	Stat3	Ung			Rab14	Tcf19	Me2	Grina	Slitrk2	Rrbp1		Pdlim5
502	Arap1	Npm1	Nudt14	Nudt21	Tox	Ier2			F630028O10Rik	Ugdh	Fam129a	Strbp	Tra2a	Tgfb1i1		Myo10
503	Heg1	Spats2l	Gata6	2700029M09Rik	Tmbim4	Snrpf			Tgfbi	Hnrnpr	Cdc14a	Armcx3	Epha5	Tbx3		Mcam
504	Rbm28	Muc16	Abhd14b	Tk1	Zfp516	Shmt1			Tpst2	Fkbp3	Mkrn1	Pim2	Rrm2	Ncapd3		Lifr
505	Dlgap4	Gpi1	Tom1l1	Med30	Ube2b	Nhp2l1			Taok3	Hcfc1r1	Cdkn2d	Drg1	Rbmxl1	Mis18a		Nrbp1
506	Rest	Podn	Eepd1	Uqcrfs1	Gm1673	Fam64a			Selplg	Reep4	Arid5a	Ube2e3	Atp1a2	Srsf11		Tspan14
507	Mex3a	Fam195b	Btf3	Minos1	Ift57	Ssbp1			Abca9	Cdca5	Stat1	Zbtb7a	Snrpa1	Eme1		Coro1c
508	Zyx	4930523C07Rik	Anxa7	Pfdn2	Chchd10	Mphosph6			Snap23	Lor	Git2	Polb	Srrm2	Cdk12		Kctd12b
509	Gm1673	Ubc	Fstl3	Plk1	1500009L16Rik	Fxn			Cd44	Cep57	Skap1	Dcun1d1	Mlip	Smarce1		Itga5
510	Stag1	Cd2ap	2610035D17Rik	Fam46c	Sec61b	Fgfr2			Fau	Flnc	Rabgap1l	Psmb3	Bcl7a	Prr5		Uqcc3
511	Ly6h	Slc16a1	Ndufa4	Acaa2	Nucb1	Atp5a1			Dazap2	Smc3	Syngr2	Cldnd1	Pcgf1	Hmgn1		Elmo1
512	Arf4	Stmn2	Pbld2	Ube2l3	Pbxip1	0610007P14Rik			Tuba1c	Anln	Tmem50a	Pla2g12a	Bcat1	Ndn		Slc2a1
513	Ramp3	Arf5	Taldo1	Polr2j	Rab7	Hacd2			Bnip2	Fzr1	Zeb2	Klhl7	Plekha5	Hist1h3c		Plod1
514	Rps2	Srpx	Sult1a1	Comtd1	Rcan3	Enah			Hspa8	Kif4	Acot7	Rbm39	Npm1	Nudcd3		Mgat1
515	Anxa2	Gm15050	Rpl7	Stip1	Vat1l	Srrm1			Arl6ip5	Ssrp1	Fam49b	Hnrnph3	Gps1	Ranbp1		Pde4d
516	Map1b	Camta1	Ccdc90b	Nucks1	St8sia3	Atox1			Rtp4	Ift43	Hck	Hmgb3	Nelfcd	Zcchc9		Ctgf
517	Cdk11b	Sgce	Me1	Samm50	Emc7	Cct7			Ptpre	Camta1	Stap1	Sec62	Plcb4	Gas2l3		Thbs1
518	Srsf5	Col6a6	Txndc15	Mydgf	Papss2	8430408G22Rik			Bank1	Clec11a	Leprotl1	Ubxn4	Ppp2r2a	Phlda3		Nostrin
519	Ltbp4	Rps26	Arid5b	Nup37	Tonsl	Cbx5			Arhgef6	Isyna1	Abracl	Polr2g	Fbl	Srsf10		Gnb1
520	Hoxb2	Fam114a1	Fam134b	Mettl1	Kctd13	Mdh1			Arsb	Snrpc	Pkm	Fam122a	Jkamp	Kazald1		Jup
521	Amer1	Rhoj	Pla2g16	Odc1	Tmem57	Mthfd1			Pira2	Plk4	Cbfa2t3	Ift22	Dnaja2	Tmem200a		Rabac1
522	Clip3	B4galt4	Nt5c	Ptp4a1	Golgb1	Papss1			Prelid1	Cers4	Neurl3	Smarcc1	Chd4	Mtpn		Tpm3-rs7
523	Ccdc88a	A830082K12Rik	Akr7a5	Tmem54	Pla2g16	Nono			Aup1	Timp1	Ccr7	Pbrm1	Map1a	Ppih		Adora2a
524	Twist2	Il33	Pdx1	Mybbp1a	Aacs	Galm			Pim1	Mesdc2	Coro1b	Srsf6	Fam184b	Cygb		Gpi1
525	Tgs1	Smim3	Tbca	Mrps18b	Rfx6	Atp5j			Msrb1	Ckap5	Rgs19	Ube2d3	Ssna1	Ldhb		Traf7
526	Sesn3	Pafah1b3	Ift43	Nans	Atp6ap2	Frrs1			Ptafr	Hspb8	Ankrd44	mt-Atp6	Ppp1r18	Baz1b		Macf1
527	Nisch	Chst12	Cgnl1	Gm10320	B4galt6	Mrpl14			Cxcl16	Pkmyt1	Arhgdia	Hnrnpm	Serinc1	Ccnf		Eif4ebp1
528	Lgi2	Uqcc3	Cox4i1	Hsp90b1	Kcnk3	Nsmce1			Vps29	Hsp90aa1	Cxcr5	Mrpl32	Rbm8a	Pmp22		Ifi27
529	Tmem119	Zfp57	Espn	Atad3a	Ndn	Umps			Fam213b	Gga2	Plek	Ccs	Wbp1	Rdh10		Rrbp1
530	Tead2	Tgfb2	Ephx1	Gpatch4	Myo6	Actn4			Smpdl3a	Maged2	Ppm1m	Slc25a17	Nabp2	Abcc9		Map4k4
531	Frmd4a	Meis2	Sdhaf4	Atp5c1	Ankrd54	Bub1			Sh3gl1	Mrrf	Npc2	Amn1	Cycs	Aspn		Pdia5
532	Srrm1	Thbd	Gtf3c6	l7Rn6	Kmt2a	Tsn			Snx8	Bcl7c	Fam46a	Dera	Zfp422	Ankrd11		Npdc1
533	Eci2	Fcor	Nono	Rangap1	Phyhipl	Actl6a			Pltp	Mettl9	2024-09-09	Fam210b	Nap1l4	Cdkn3		Bambi
534	Rpl8	Pdlim3	Tmem178	Rpl10-ps3	Ubxn6	Eif3c			Tmem256	Crtap	Cd68	Chordc1	Mrpl13	Ilf3		Map1lc3b
535	Hmcn1	Arl4d	Mansc1	Cox7a2	Polr2k	Pafah1b3			Lrp1	Sgol1	Rcsd1	Atp5f1	Tcaf1	Lsm6		Bcl6b
536	Ptprd	Pcbp4	Tm2d3	Gcsh	Tmod2	Fam96a			Emilin2	Ehd2	Elmo1	Abhd16a	Gsta4	Wbp4		Fcgrt
537	Armcx6	Speg	Llgl2	Polr2e	Aig1	Eif5a			Fez2	6330403K07Rik	Psme1	Psmb6	Fermt2	Psip1		Hhex
538	Uqcrh	Psme2	Plscr1	Ptrh2	Trp53i13	Eef1e1			Cd47	Nt5c3b	Klk8	Cldn7	H1fx	Tcf19		Map7d1
539	Rps11	H3f3a	Clint1	Bccip	Chka	Psma6			Orai1	Frmd4b	Rps24	Syt7	Zmat2	Pds5b		Sptlc2
540	Rnf7	Parvb	Marveld3	Galk1	Rufy3	Snrnp70			Zfand5	Mis18a	Ier3	Psmd2	Gjc1	Dhx15		Trp53
541	Plpp1	Fbn1	Tmem256	Rrm1	Khdrbs3	Mrpl23			Tnfaip8	Abcg2	Tgif1	Brd3	Gfra2	Rpl27		Vamp3
542	Ppp1r14a	Atp5d	Anp32a	Ubl4a	B4galt3	Syncrip			Clec12a	Tra2b	Gcsam	Cops5	Idh1	Morf4l1		Ptprr
543	Eif4ebp1	Abhd14a	Aldh7a1	Mrps36	Slc29a1	Gpt2			Rnf149	Tsen34	Clec4n	Dcaf8	Stx7	Anapc5		Jam3
544	Mmp23	Lrp1b	Tmem171	Impdh2	Gabarap	Ptges3			Ocel1	Sptssa	Ccnl1	mt-Cytb	Adprh	Ska3		Anp32a
545	Ssbp2	Arl3	Midn	Rbx1	Ccpg1os	Cenpm			Itgb5	Fgfbp1	Trf	Dnmt3a	Pttg1	Dpysl2		Stx6
546	Pdcd5	Pbx1	Suclg2	Nip7	Tmsb15b1	Fdx1			Bmp2k	Nrm	Stk4	Smek2	Itpa	Golga7		Stx12
547	Arhgef40	P3h3	Pfdn1	Serpinf2	Agtrap	Nde1			Vwa5a	Hat1	Csf2ra	Irf2bp1	Dek	Eif5b		Cd59a
548	Sdk2	Stxbp6	Commd3	Psmg1	Dnajb9	Decr1			Eif4ebp1	Dlgap5	Hspa8	Rab7	Tbpl1	Rnps1		Exoc3l4
549	Nfic	Kdelr1	Cttn	Mcm6	Fkbp2	Ctcf			Ldha	Hnrnpa2b1	Dock8	Klf10	Mab21l1	Sfpq		Mmd
550	Serping1	Parm1	Pfdn5	Lig1	Trp53inp2	Idh2			Nudt16	Zbed3	Mki67	Rbx1	Cct2	Calm2		Piezo2
551	Adrb3	Cstb	Slc25a13	Gpc3	Dynll2	Cycs			Pkib	Esco2	Nrip1	Tor2a	Dpysl4	Rbms3		Gemin7
552	Asxl3	Marcksl1	Tmem230	Clpp	Zfhx2	Prdx2			Dse	Ect2	Serpinb6b	Rnf220	Psmd7	Tex10		Nfib
553	Nhs	Ext2	Magi1	Rpn2	Myeov2	Pin1			Hmha1	Gsta4	Aim2	Eif4e3	Slco3a1	Lbr		Palm
554	Enah	Lamtor4	Eif3l	Mrpl35	Gipr	Pdlim1			Amdhd2	0610007P14Rik	Ikzf3	Dpysl4	Rbm38	Txn1		Pgm1
555	Rpl24	Sptssa	Cblc	Wdr12	Socs3	Hspa8			Cd163	Ywhae	Pnkp	Prr15l	Snrpa	Eif1b		Gdi2
556	Topors	Fam32a	Ppa2	Eif3b	Nav2	Nudt1			Susd3	Bnc2	Commd8	Ids	Ypel1	Ace2		Tmem255b
557	Gm11627	Tfdp2	Fam63a	Lap3	Ankrd12	Smim22			St8sia4	Ctsl	Rps11	Crybb1	Aars	Ccdc80		Trib2
558	Sfrp2	Mfsd10	Foxa2	Ergic2	Dnmt3a	Espn			Btg2	Trmt112	Pid1	Snapc3	Crabp2	Xpo1		Rasgrp2
559	Rps13	Ost4	Spon1	Dnajc19	4833439L19Rik	Haus1			Traf3ip3	Palld	Sirt7	Ccdc115	Meis3	Limd2		Arpc5
560	Kctd12	Wfdc1	Fndc3b	mt-Cytb	Bpnt1	Chaf1a			Mafb	Rab33a	Ptbp3	Rrp1	Eif4a1	Sub1		Galnt18
561	Skp2	Clic1	Enpp5	Drg1	Tomm7	Cnih4			Bcl10	Mif	M6pr	Ctnnbip1	Prc1	Tmem100		Efnb2
562	2024-09-04	Sar1a	Rprm	2700094K13Rik	Gmpr	Tsfm			Csk	Cetn3	Irf1	Eif3f	Pbrm1	Nktr		Ptprm
563	Btg1	Abcg2	Ctnnd1	Polr2k	Usp51	Sarnp			Hlx	Cit	Emilin2	Cct7	Cited2	Luzp1		Pxn
564	Mat2a	Hspb11	Uqcrc2	Gins2	Maob	Cdca7l			Cmtm3	Npm3	Ppp1r11	Fgd4	Wtap	Pth1r		Yes1
565	Svep1	Pdia3	Ogt	Wbp5	Actr10	Pkn2			Ifi203	Ranbp1	AI467606	Slc24a5	Ssb	Impdh2		Zeb1
566	Ankrd11	Galk1	Zkscan1	Ewsr1	Ddost	Usp1			Csf2rb	Cd2ap	Tnfsf9	Dynlrb1	Hnrnph1	Rplp1		Stap2
567	Afap1	Col4a5	Hbp1	Naa10	Cspp1	Banf1			Stard3nl	Mdk	Saraf	Mrps11	Erh	Rbm22		Pxdn
568	Fau	Rps19	Rbbp9	Sae1	Ndufb10	Tdp2			Atp6v0e	Skp2	Dok3	Spock2	Cd200	Tspan6		Mesdc1
569	Slitrk5	Cnpy2	Cryz	Nasp	B9d1	Ap1m2			Eps15	Tmem109	Pyhin1	Psmd13	Psmc5	Cotl1		Necap2
570	Gsk3b	Nradd	Anxa2	Tmem147	Tmem199	Tcf3			Sesn1	Col5a2	Fuca2	Kcnh2	Csnk1a1	Raly		Myl12b
571	Clk1	Ndrg1	mt-Co1	Ppat	Casz1	Hnrnpl			Btk	Mrpl28	Rasal3	Ubl7	Mtx2	Ttk		Arhgef7
572	Rsrc2	Tln1	Rpl18a	Uck2	Smdt1	Sgol1			Tubb6	4930523C07Rik	Ehbp1l1	Tmem63b	Gnas	Egr1		Znrf1
573	Rpgrip1	Unc119	Naaladl2	Htra2	Atp2a3	Pnn			Dnase2a	Chaf1a	Abi1	Pkm	Limd2	Clns1a		Serf2
574	Pfdn5	Slc2a1	Slc27a1	Mpp6	Atp6v1c1	Mpc2			Cysltr1	Ska1	Ccr1	Msi2	Mxra7	Rbbp4		Ier5
575	Rps19	Rab18	Gadd45b	Vrk1	Mcf2l	Mrpl54			Ifitm6	Aunip	Arhgef1	Gpbp1	Ccdc88a	Cacybp		Sec14l1
576	Chd4	Yif1b	Rp9	Mcm5	Dnajb2	Ckap2			Klhl6	Acat2	Nckap1l	2310036O22Rik	Rnps1	Ddx46		Pdgfb
577	Nras	Tns3	Ctgf	Ndufs7	Sin3b	Hint1			Sp140	Pcbp4	Dok1	Tsr3	Csk	1500009L16Rik		2024-09-07
578	Npr3	Dhrs3	Smim20	Ahsa1	Ppp1r14c	Ppm1g			Tmem86a	Isoc1	Fcho1	Tmem238	Atp6v1g1	Vcan		Pdlim7
579	Txlna	Rest	Sdf2	Timm17a	Cfap126	Hsd17b10			Adap2os	Prelid1	Rnf166	Zfos1	Nucks1	Actb		Rap1a
580	2700060E02Rik	Prkcz	Slc2a1	2810004N23Rik	Dad1	Pfdn6			M6pr	Nudt21	Rara	Fam151a	Gnb4	Cenpp		Ctla2b
581	Rpl30	1110065P20Rik	Rest	Carhsp1	Slc43a2	Rad21			Grb2	Lsm8	Cdc42se1	Bckdha	Col4a2	Mef2c		Foxp1
582	Atp5k	Tspan6	Ifitm2	Fxn	Cyth2	Nae1			Leprot	Meis2	Slc15a3	Peli1	Rrm1	Alkbh1		Pkig
583	Hnrnpr	Tppp3	Btf3l4	Gm9493	Araf	Fam181b			Sirt2	Matr3	Jun	Prpf40a	Myef2	Mier1		Prkd2
584	Zc3h13	Tmem165	Ergic3	Pycrl	Rpl10-ps3	Smc1a			Commd4	Ncapd2	Bfsp2	Npc2	Dda1	Airn		Prkab1
585	Rpl13-ps3	Pigt	Fam20c	Mrpl23	Stard5	Cct8			Abracl	Nfic	Mif4gd	Map2k2	Lmnb1	Spag5		Timm10b
586	Rpl12	Rdh10	Cers2	Rps26-ps1	Gse1	Uqcrc2			Mtss1	Ppia	Nusap1	Peg3	Actg1	Nid1		Eef2
587	Snai1	Tcea3	Pgpep1	Mgat2	Alcam	Psrc1			Tmbim6	Nup37	AI413582	Atp6v1c1	Lsm1	Slbp		Gata2
588	Dtx3	Bnip3l	Alb	Grpel1	C8b	Acp1			Plbd1	Zfp422	Ahr	Ubl3	Cacna2d1	Ifi27		Glmp
589	Tbx3	Supt4a	Snhg18	Qtrt1	F3	Parp1			Slc29a1	Tmed9	Ifngr2	Cd40	Eef1g	Snrpb		Ephb4
590	Wdr60	Efna3	Zfp395	Cdca7	Gde1	Pfdn4			Nfam1	Klf5	Rps6ka1	Anp32a	Mapre2	Hnrnpd		Ptprg
591	Sf3b2	Nrp2	Arhgap5	Adh5	Syt4	Sms			Slc16a3	Fhl1	Esyt1	Jarid2	Brd3	Col23a1		Flt4
592	Morf4l1	Cnn2	Lamp2	Eif2s2	Myt1	Suclg1			Sdf2l1	Ryk	Nr4a2	Pik3r1	Smc6	Tipin		Pde8a
593	Rgcc	Ctf1	Mgst2	Rcan2	B630019K06Rik	Ube2l3			Akap13	Cenpn	Tap1	Cited1	Cct4	Rbm25		Tgfbr2
594	Cacfd1	Tspan5	Mcl1	Vdac2	Usf2	Gtf3a			Stra13	Pcbp1	Zap70	Galk2	Smap1	Wdr86		H2-T23
595	Tia1	2810474O19Rik	Cyba	Snrpd2	Mllt11	Scaf11			Ifi27	Sdc2	Scp2	Ttyh2	Tmem33	Fkbp7		Notch1
596	Pdcd11	Ptms	Anapc13	Pfn1	Twsg1	Asf1a			Dock2	Ilk	Crem	Fam135a	Hmgb2	Tbx3os1		Sep15
597	H3f3a	Col12a1	Taf6l	Nup43	AI413582	Aars			Lrmp	Pafah1b3	Tpt1	Trib1	Ttyh1	Rpl31		St3gal6
598	Sgk1	Morf4l2	Akr1c19	Rnps1	Akr1c19	Dnaja2			Paox	Pdzd11	Glrx	Lpcat3	Paics	Hmg20b		Smad1
599	Kdm5b	Ecel1	Pbxip1	Arhgdig	Arf3	Nudt14			Osbpl9	Krt15	Fam174a	Psmd6	Usp39	Ccdc186		Tns1
600	Arhgap10	Fam132a	Dusp9	Hnrnpk	Gnai1	Nxt1			Pilra	Zfp101	Blk	Ppdpf	Map4k4	Ppp2r5d		2700094K13Rik
601	Knop1	BC022687	Rpl23a	Hibadh	2310022B05Rik	Fubp1			Cmklr1	Oaz1	Sell	Ube2w	Dnajc8	Rnaseh2c		Frmd4a
602	Pcdh9	Mpst	Fam181b	Kif22	Baz2b	Brix1			Gna15	1110004F10Rik	Itpr2	Rbm42	Gm12688	Zc3h13		Abca1
603	Pds5b	Cldnd1	Gsr	Spcs3	Fbxl16	Rad50			Ppt1	Cntln	Ppp1cc	Rab11a	Nudt4	Sh3bgrl		Map3k11
604	Elk3	Gnb4	B4galt6	Commd3	Fam135a	Sf3b4			Aldoa	Galk1	Stk10	Zfp292	Serbp1	Iqgap2		Dock9
605	1810022K09Rik	BC029214	Pdcd6	Hn1	Adgrg1	U2surp			Abi1	Col6a2	Ddx5	Ube2n	Rpl8	Amer1		Fam129b
606	Pddc1	Nrbp1	A730098A19Rik	Mrps25	Ghr	Trim27			Fuca2	Bub1	Ikbkb	Fhl2	Tpx2	Atp5k		Ap2s1
607	Tln1	Nsg1	Mdh1	Nup85	Gm7334	Supt16			Osm	Hells	Clec4a3	Tia1	E130114P18Rik	Lsm4		Thrsp
608	Vgll4	Golgb1	Glod4	Spcs1	Ift22	Thoc7			Gimap6	Cnih4	Nebl	Nedd4l	Baz1a	Crebbp		Slc31a2
609	Gng2	Stx5a	Tmx2	Gstm3	Klhl32	Pole4			Akr1b3	Hoxb8	Pde6d	Clcn3	Mrps6	Aimp1		Exoc3l2
610	Eid1	Marc2	Tmem55a	Mrpl37	Dusp1	Hspa4			B4galnt1	Hnrnph1	Casp1	Ilf2	Gdi1	B930036N10Rik		Babam1
611	Fos	Mrgprf	Atp2b1	Etf1	Rab3d	Actr3			Ncoa3	Gcsh	Pou2f2	Sod2	Pfdn2	Luc7l2		Mmrn1
612	Pdzrn3	Sigmar1	Fam213a	Thoc7	Slc14a2	Snw1			Psmb10	Ddx39b	Adrbk1	Sel1l	Map7d1	Hnrnpm		Rps6
613	Gm9844	Yipf3	Nfix	A430005L14Rik	Pla2g6	Tubg1			Arhgap17	Plpp1	Clec4a1	Psmd12	Tulp4	Ndufa3		Pcdh12
614	Ppp1r15a	Cdc16	Tmem229a	Mdh1	Aco2	Arrdc1			Rbms1	Atp5d	Arid4a	Nhlh1	Mad2l2	Rcn2		Pdzd2
615	Cdc26	Parva	Lzts2	Psmc6	Ndrg1	Ptprf			Rps11	Mrpl18	Tnik	Bco1	Maged2	Ccng2		Unc5b
616	Gstk1	Cux1	Dab1	Mrpl14	Atp6v1d	Ctsh			Slc7a8	Ncaph2	Lpcat2	Tcf3	Anxa5	Kdelr2		Pcdh1
617	Arid5b	Lpcat3	Pja1	Pgls	Hint2	Hist1h2bc			Cox5a	Kif11	F630028O10Rik	Ythdf2	Itih5	Tns3		Raph1
618	Rpl6l	Phpt1	Fam234b	Psat1	Med25	Tead2			Mafg	Rnaseh2a	Lactb	Serpini1	Serp2	Pdlim2		Smtn
619	Nasp	Htra2	Chmp4b	Trap1	Card19	Exosc7			Ap1s2	Khdrbs1	Fgl2	Sf3b6	Gpc6	Pofut2		Btnl9
620	Atp1b3	Isoc1	Cyb5a	Tob1	Mrpl41	Cep57			Dok1	Map1a	Tax1bp1	Zfp207	Mxd4	Zc3h15		1700020I14Rik
621	Tmem243	Prr5	Rps27rt	Pabpc4	Jagn1	Commd1			Emb	Rhno1	Glipr2	Glrx2	Vdac1	Rps8		Lfng
622	Igf2bp1	Eif3f	Rps9	Abcf1	Dnpep	Stoml2			BC028528	Pkm	Plcg2	Stxbp1	Fsd1	Rgs3		Polr2e
623	Tspan18	Fam69a	Iqgap1	Bri3	Pianp	Mrpl51			Rgs19	Polr2e	Tecpr1	Mtfr1	Pgp	Gm266		Tacc1
624	Nrbp1	Uqcrh	Tpm3	Thyn1	Gjd2	Emc8			Sec11c	Nhp2l1	Rhoa	Agpat3	Cxx1b	Atp1b3		Isg15
625	Flnc	Hdgf	Csrp2	Coq7	Bbx	Tle6			Sh3bp1	Fam92a	Ncor1	2700060E02Rik	Gspt1	Pcnt		Pomp
626	Crebbp	Dpp4	Tcf3	Taf13	Ttc39b	Nr5a2			Inpp5d	Zbtb8a	D16Ertd472e	Zfr	Parp1	Tagln		Mxd4
627	Eif3e	Tmem221	Smpd2	Id2	Nipal1	Ube2t			Cdc42se1	Bub1b	Sipa1	Tdg	Htr3a	Topors		Phactr2
628	Rbms2	Foxp2	Tmem123	Rpp30	Bambi	Timm50			Rab1a	B4gat1	Mns1	Otub1	Ncor1	Snhg6		Lyn
629	Bcl9	Nid1	Rnh1	Hars	Fam46a	Ppie			Mfsd11	Cdc16	Tbc1d4	Slc29a4	Glrx5	Mprip		Aldoa
630	Mier1	Fus	Gm12942	Gtpbp4	Eif1	G3bp2			Dram2	Chaf1b	Cyfip2	Fam101a	Cenpe	Csrp2		Asap1
631	Ilk	Pygb	Myo1b	Hn1l	Tmem106c	Ahsa1			Zfyve21	Srsf7	Psen2	Mapk15	Rbm25	Dtymk		Lrp10
632	Efna5	Pttg1ip	Lpp	Fbxo16	Ctso	Morf4l1			Fkbp15	Dcakd	Spty2d1	Ngfrap1	Gtf2h5	Rrm2		Myo6
633	Akap13	St8sia1	Nr0b2	Hat1	Rab11a	Prss8			Tnfrsf11a	Prkaca	Il18r1	Elavl1	Ilk	0610010K14Rik		Ifnar2
634	Rpl27a	Arl2	Igsf5	Mrpl47	Trappc2	Med30			Rragc	Slc48a1	Ptpn1	Tmem159	Psat1	Fam83d		Dnaja1
635	Mtpn	Zfp185	Plscr3	Rpp21	Scn3a	Hebp1			Ophn1	Smarcc1	Cmc2	Dynlt3	Rpl14	Mtdh		Sema6d
636	Arhgap28	Ccdc106	9530068E07Rik	Noc4l	Il6ra	Lsm8			Tpd52	Arid4b	Akirin1	Rsrc2	Smc1a	Adgra2		Vegfc
637	Meis3	Eef1a1	Ugt2b35	Mrps34	Stx7	Eif3l			Cd28	Tmem165	Il18rap	Acadvl	Pirt	Rem1		Chst7
638	Lix1l	Khk	mt-Atp6	Tdp2	Pou6f2	Mrpl49			Nme4	Zfp503	Foxp1	H1f0	Anapc5	Fgfr1		Filip1
639	Cyth3	mt-Nd4	Cyp2j6	Cox6a1	2010107G23Rik	Puf60			Wwp2	Snrpa1	Bri3bp	Clk3	Alkbh1	Strap		Chst1
640	Hdgfrp3	Vgll4	Phyh	Bcas2	Pex7	Dkc1			Rnaset2a	Gipc1	Tkt	Psmd1	Hdgfrp3	Qk		Mapk12
641	Nmt1	Zfp579	Slco3a1	Ttc39a	Pgf	S100b			Dok3	Nedd8	Rbm39	Prpsap1	Ptges3	Nras		Ndel1
642	Pros1	Glt8d1	Tmem184a	Cct3	Wnk1	Gstt1			Gipc1	B3gnt9	Ifitm3	Smim20	Ube2m	Zwint		Skap2
643	N4bp2l2	Cuedc2	Mrps36	Seh1l	Ndrg3	Tceal8			Tfec	Pspc1	Zbtb16	BC005561	Afap1l2	Actl6a		Sat1
644	Pls3	Podxl2	Mmp14	Atp5j2	Mafg	Hn1l			Mndal	Rif1	Lag3	Capsl	Heyl	Rnf219		Xaf1
645	Cbx1	Mast4	Aamp	Psmd6	Ift20	Prps2			Itga4	Kcnab1	Cks2	Wbp4	Tmem160	G3bp1		Rps6ka3
646	Rps7	Surf4	Tsc22d1	Lage3	Ddx6	Nav2			Sipa1	Brip1os	Pilra	Tmem128	Ets1	Lmna		Tmed5
647	Thra	Mageh1	Eef1a1	Eif2b3	Abcb9	Pigyl			Actg1	Snrpd3	Pde4b	Gnb2	Ccnb1	Ptbp1		Lbp
648	Myadm	Ngfrap1	Fam103a1	Slc25a10	Tvp23b	Tceb1			Sord	Tgfb3	Apobec3	Smarca5	Acin1	Hdgfrp2		Tln1
649	Fzd2	Ech1	Ociad2	Snrpg	Jun	Bub1b			Ogfrl1	Dazap1	Ubash3b	Lrrn2	Sh3bp1	Rps20		Zdhhc20
650	Zcchc24	Rps7	Ablim1	Prim1	Sfxn2	Tardbp			Slc31a1	Polr2d	Krit1	Kdf1	Calm3	Cep57		Piezo1
651	Srsf11	B3gnt7	Polr2f	H1f0	Rsph9	Haus8			Atp6v1a	Med22	Ccng2	Fxyd2	Ppp1cc	Acat2		Bak1
652	Ccdc102a	Nek6	Meg3	Pdcd10	Fbxl15	Psmc3ip			Rap2b	Cops8	Rplp0	Ube2s	Evl	Rbmxl1		Socs2
653	Gm10020	Sema3a	Gstp1	Ube2v2	Ndufs5	Mrpl40			Spg21	Olfml3	Klf2	Dpf2	Tbx2	Rfc5		Gng12
654	Cdc42ep5	Klk10	Tmem86a	Psmg2	Fabp3	Ndufa4			Gns	Ppil1	Pak2	Selt	Cct5	Rpl36a		Jak1
655	Grb10	Fam69b	Etfa	Ezh2	Dync2h1	Hnrnpc			Sptlc2	Maged1	Tor1aip1	Arpc5l	Ubn1	Taf11		Arhgef1
656	Sned1	Wrb	H2-K1	Pycr2	Nr4a2	Cat			Snx30	Trip6	Pon2	Sqstm1	Sms	Gins4		Flnb
657	Wdr89	Cnih2	Atp5a1	Ndufc2	Reep6	Rad51ap1			Itgb2	Gm1673	Phip	Clta	Camta1	Mcc		Ggta1
658	Rpl10	Rims1	Tead2	Phb	Ankrd37	Cdca5			Sh3bp5	Cdon	Rab27b	Phldb2	Sparc	Lyar		Prickle3
659	Itih5	Bace2	Hadhb	Znhit3	Churc1	Parl			Abi3	Cd200	Slc41a3	Sulf2	Rbm17	C330027C09Rik		Rtp4
660	Grcc10	Ing4	Mrpl32	Pdx1	Tnrc6b	Rdx			Pirb	Prim1	Rps6	Kcnb2	Id2	Socs3		Gm10709
661	Fxyd1	Susd2	Bcl2l1	Ssr3	Ddr1	Wdr18			Gpr160	Loxl2	Cnppd1	Ncstn	Ccdc174	Ptprd		Peak1
662	Tbx2	B4galt1	Grhpr	Anp32a	Mamld1	U2af2			Cd200r1	Hist1h4i	Xist	Anapc16	Gemin7	Nmt1		Rapgef3
663	Mmp11	Mfap4	Psmd10	Gusb	Morn2	Atad2			S100a4	Rras2	Jmjd1c	Cops2	Snrpc	Tln1		Grasp
664	Srpx2	Hmgn1	Morn2	Ndufa10	Bmyc	Hspa14			Vps35	Zbtb7c	Pirb	Pin4	Ntmt1	Nipbl		0610010K14Rik
665	Rpsa	Igfbp3	H2-Ke6	Cox7b	Ip6k2	Dbf4			Adrbk1	Med21	Cdc42se2	Rorc	Gtpbp4	Pik3ca		Hoxaas3
666	Casp8ap2	Ryk	Acp6	Ndufaf4	Guk1	Sdhd			Tceb3	Fen1	Map3k8	Gm8797	Tfap2b	Thy1		Elovl1
667	Crabp1	Glipr2	Suclg1	Fam96a	Lamp1	Sgf29			Napsa	B230219D22Rik	Pacsin1	Clptm1	Tcp1	2700060E02Rik		Gnb2
668	Gxylt2	Rsu1	Evi5	Ube2k	Actl6b	Ndc80			Zcchc6	Emp2	Alox5	Cct2	Cks2	Rplp2		Ndrg1
669	Yipf5	Ptp4a2	Cdh3	Timm50	Hspa8	Bsg			Rasgef1b	Ccnf	Frg1	Hmgn1	Trappc4	Gypc		St6galnac3
670	Lamtor3	Flna	Dnajc15	Bola3	Gdap1	Rxrg			Hk2	Emp1	Bak1	Tmem199	Hnrnpr	Zranb2		Traf4
671	Klhdc8b	Gcnt1	Nxf1	Slc25a13	Akap9	Smarcb1			Isg15	Oprk1	Adam8	Uqcrb	Tprgl	Eci2		Cpd
672	Csnk2a1	Cadm3	Rps7	Wdr89	Cisd3	Psmb5			Atp6v1e1	Get4	Foxs1	Glyr1	Mpped2	Rlim		Nmi
673	Tubb2a	Ptgs1	Casp6	Mrps30	Mdm1	Rnps1			Syk	Nudcd2	Mcl1	Sarnp	Actr1a	Cenpk		Crip1
674	Cops8	Colgalt1	Cryab	Hypk	Lrrc73	Nsmce2			D1Ertd622e	Nop56	Mctp1	Pcyt1b	Ick	Gm9843		Mkl2
675	Itgb1	Smpd3	1500011K16Rik	Cetn3	2410015M20Rik	Anapc11			Cryl1	Rbmx	Ptger2	Sucla2	Sapcd1	Bcas2		1700025G04Rik
676	Vcam1	Ralyl	Ndufc2	Acer2	Maff	Dlgap5			Tnfrsf1b	Srsf9	F2r	Aco2	Cadm4	Ctdspl2		Klk8
677	BC028528	Kcnab1	Vmp1	Mbd3	Nbea	Nudcd2			Cebpa	Serf2	Ccdc88a	Chd4	5033428I22Rik	Myef2		Ube2a
678	Tspan3	Raly	Tfrc	Eif3a	Znhit1	Nup43			Tmed5	Pbdc1	Bin3	Abcf1	Ppia	Nudc		Agpat4
679	Brd3	Rab13	Hebp2	Srsf3	Pdgfrl	Tax1bp3			Hebp1	Muc16	Tns4	Psmb7	Eif2s2	Cnrip1		Tmem140
680	Cdc16	Prelid1	Dazap2	Gm10036	Ffar1	Igsf3			Morc3	Tmem237	Itk	Armc10	Atxn7l3b	Rwdd1		Fkbp10
681	Cebpz	Myo1c	Sema6a	Dcun1d5	Zbtb7a	Fh1			Myd88	Hdac2	Plekhj1	Atat1	Ndufv1	Pdzd2		Rilpl1
682	Cotl1	Ube2e3	Fuca2	Pfdn4	Serpina1b	Rsl1d1			Mvp	Topbp1	Ifi35	Taf13	Id4	Ppp1r12a		Wdfy1
683	Matr3	Cbx6	Eef2	Car14	Stx1a	Cox7c			Zfp710	Gjc1	Tuba4a	Tcp11	Rcn2	Csde1		Ier3
684	Klhl22	Acot9	Dnase2a	Psmc5	Kdm7a	D030056L22Rik			Plekho2	B4galt4	Cd9	Ctr9	Gstk1	Ncaph2		Ccnl1
685	Trip6	Cox19	Elf5	Me2	Slc16a12	Tbca			Itm2c	Smdt1	Clec2i	Pcmtd2	Slc39a6	Loxl1		Raly
686	2024-09-09	Pigyl	mt-Cytb	Asf1b	Fam134a	Ccdc58			Gsdmd	Bok	Adora3	Kdm6b	Ccnl1	Ddr2		Rexo2
687	Ogfr	Ugdh	Marc2	Krtcap3	Cxx1a	H2afj			Cd164	Rarb	Rexo2	Hnrnpc	Vgll3	Cdc7		Hbegf
688	S1pr2	Golm1	Nipsnap1	Psmd11	Nktr	Dars			Pacsin2	D030056L22Rik	Lztfl1	Plgrkt	Ap2m1	Snai1		Bhlhe40
689	Rpl28	Mif4gd	Serinc2	Ddx39b	Auts2	Zcchc11			Wnk1	Ptbp1	Cd96	Fubp1	Otub1	Igf2bp3		Dram2
690	Mum1	Slc9a3r2	Cnbp	Cops6	Arl4a	Apip			Ccdc115	Dnajc8	Slc16a3	Gm28172	Tmem55a	Eif4h		Nt5c
691	Epb41l4aos	Znhit1	Sox5	Txn2	Gnaq	Ywhae			Btg1	Tmed1	Cysltr1	Ip6k2	Trp53	Calu		Shisa5
692	2410002F23Rik	Tmem263	Tvp23b	Anapc13	Sod1	Ppa1			Apold1	Eme1	Slc38a1	Btf3	Zwint	Arhgef40		Adcy4
693	Adam19	Irak1bp1	Pink1	Grwd1	Lin7c	Apitd1			9930111J21Rik2	Morf4l1	Bcl10	Psma7	Snrpd3	Utp11l		Git2
694	Hp1bp3	Hspb2	Ginm1	Mrpl40	Skap1	Slc25a13			Rsrp1	Thoc3	Spn	Srsf7	Ccser2	Svil		Sertad1
695	Hoxb6	Bsg	Wnt7b	Psme3	Gm43194	Ndufv2			H2-DMb1	Hirip3	Acsl5	Plscr3	Caprin1	Zfp422		Dnajc8
696	Slc43a3	Vat1	Dalrd3	Smc4	Fryl	Fabp5			P2ry12	Smoc2	Baz1a	Srsf1	Mycbp2	Pcm1		Mbnl2
697	Mprip	Kank1	Tsen34	Ier3ip1	Os9	Psme1			Tor1aip1	2024-09-07	Rpl4	Ovol2	Peli1	Rps15a		Txn1
698	Ppp1r12a	Dock11	Zfp703	Grhpr	Lhx1os	Pyurf			Oaz1	Cux1	Gm15987	0610009B22Rik	Ywhag	Pfdn6		Aida
699	Dhx30	Mest	Fcf1	Mrpl20	Slc7a8	Atp5g2			Arhgap25	Nedd4	Fosb	Pkig	Riiad1	Cenpc1		Ocel1
700	Rsl24d1	Prrg3	Ctps2	Cbx1	Dock11	Ccne2			Acap2	Npm1	Sppl2a	Tm2d2	Nudt21	Ddx39b		Tspo
701	Sgce	Apbb1	Klf13	Vars	Nkiras1	Gtf2a2			Il18	Surf4	Maf	Fam104a	Sdhb	Elk3		Irf1
702	Notch3	Serf1	Efhd2	Tma16	Dnm2	Aifm1			Rcbtb2	Leprot	Eef1a1	Ctxn1	Sae1	Svbp		Fyn
703	Tspan6	Sh3glb2	Htatip2	Nudc	Romo1	Gng5			Pkn1	Hnrnpl	Sik1	Pnrc1	Srp14	Znrd1		Gm12002
704	Ywhaz	Sf3b5	Cirbp	Cenpk	Nckap1	Sub1			Prdx1	Smo	Eef2	Dynlt1f	Snrpd1	Adam19		Prkar1a
705	Cdc42ep3	Efnb1	Mrpl23	Casp6	Pde3b	Pfdn2			Tmem8	Lsm6	Smap2	Ankrd54	Mpc1	Fkbp10		Rab7
706	Mrps5	Pkm	Idh1	Dnajc15	Cxxc5	Trp53			Igf1	Tsn	Prelid1	Ywhaq	Ccdc34	Hirip3		0610012G03Rik
707	Fubp1	Sertad1	Tmed1	Tuba1c	Nudt7	Timm8b			Naa20	Psmc3ip	Necap2	Mapre3	Mtf2	Frmd4a		Pkm
708	Flywch2	Vamp3	5330417C22Rik	Tmem234	Myef2	Psmd1			Entpd1	Zfp771	Samd9l	Psmd8	Epb41l4a	U2af1		Dpysl3
709	Rbm25	Mtus2	Pdgfd	Kcnk1	Slc35b1	l7Rn6			Rhoh	Rpia	Abi3	Pomgnt2	Plcb1	Col5a1		Cers5
710	Sash1	Hexb	Foxp1	Eif3j1	Ppp1r2	Atic			Ptpro	Tipin	Stx11	Klhl24	Txnrd1	Tubb2a		Myh9
711	Rps16	Fam180a	Cd59a	Cox5b	Nol4	Dnmt1			Myl6	Ube2i	Cd27	Cdc26	Mcts2	Bcl2l12		Lysmd2
712	Rpl11	Fzd2	0610009B22Rik	Eef1g	Hmgcr	Syne2			G6pdx	Cbx3	BC017643	Fblim1	Supt16	Bclaf1		Zfp36
713	Ikzf4	Kdm5b	Mllt4	Rpf1	Elp4	Pacsin3			Slc46a3	Srsf10	Dusp11	Zfp326	Akr1b3	Coq7		Sh2d3c
714	Cxx1b	Bet1l	Rbp2	Exosc4	Nkx6-1	Psmc1			Acp2	Ptprs	Atp6v0e	Cox7c	Snca	Csnk2a1		2024-09-11
715	Zfp422	Vasn	Tmed9	Aasdhppt	Mgst3	Rab3ip			Rps6ka1	Copz2	Pik3cd	Tbca	Prpf40a	Twist2		Cebpg
716	Praf2	Creb3	Uqcc3	Hspa5	Slc29a4	Smchd1			Snapc5	Isl1	Ppt2	Saraf	Fnbp1l	Hotairm1		Nav1
717	P4ha2	Dtx2	Slc35b2	Ydjc	Tm2d1	Slfn9			Dclre1c	Eid1	Adgrg5	Jund	Nrp2	Rab11b		Pear1
718	Dusp18	Ndrg2	Psmc6	Ocln	Oxtr	2700049A03Rik			Timp2	Pdcd5	Rnf13	mt-Co3	Hnrnph3	Eif4g2		Tmem44
719	Fosl2	Plekhh2	Cdk6	Rcl1	Ywhag	Hirip3			Pon3	Igfbp4	Clnk	Psmd7	Nrep	Cnep1r1		Cdh13
720	Pmm1	Maf1	Sucla2	Mrps15	Rapgef4	Smarce1			Plxnd1	Fignl1	Tcp11l2	Psmc1	Eif3e	Ddx18		Rasal2
721	Timp1	Wwc2	Scp2	Txn1	Camk2n2	Mrpl52			Hmgcl	Wtap	Fcgr2b	Hmgcr	Rhno1	Barx1		Tspan17
722	Uba7	Myl7	Shtn1	Vimp	Olfm1	Pold3			Plekhj1	2310009B15Rik	Plekho2	Pnmal1	Sccpdh	Gnb4		Gdpd5
723	Ube3a	Adgrd1	Pex2	Ppie	Fam104a	Uba2			Pak1	C1ql2	Rps9	Uba3	Ube2d2a	Cse1l		Shfm1
724	Zfp260	Rnf7	Cox7a2l	Kars	Calm1	Kif15			Trim47	Zfhx3	Casp8	Wapl	Lrrc58	Fat4		Dpysl2
725	Cdc37	Zfp580	Stap2	Shcbp1	1700056E22Rik	Kif11			Ptp4a2	Rest	Lgals1	Rab5a	Atrx	Terf1		Adgre5
726	Lef1	Fads3	Ppp1ca	Mgst2	Chpf	Mapre1			Mob1a	Ptp4a2	Myl6	Urah	Nudcd2	Ccnd2		Sigirr
727	Gm9493	Oasl2	Fam173a	Alg5	Abhd14b	Sgol2a			Itsn1	Terf1	Ms4a6b	Mast4	Apba2	Wisp1		Snap23
728	Hnrnpa1	2310009B15Rik	Igfbp7	Fam60a	Nxph1	S100a11			Engase	Tfpi	Rps16	Snrpe	Ubl3	Nav1		Lims1
729	Rsu1	Etfb	Rnf135	Utp18	Adrbk2	Pola1			Jak1	Plxdc2	Actg1	Sec11a	Sema3b	Cox6b2		Hpcal1
730	Eef1b2	Pla2g4a	Eif4a2	Tmx2	Prr7	Eif4e			Arhgap31	1500015O10Rik	Cntrl	Luc7l	Dnajc7	mt-Nd3		Gypc
731	Ing4	Lmcd1	Tmem37	Psmd1	Por	Psmc2			Hcst	Fubp1	Cnot6l	Stmn1	Fam60a	Snrpe		F2rl3
732	Tnnt1	Bfar	Cct4	Ppp1r14b	Vegfa	Cmc2			Ptpra	Efna5	Pgd	H2afy	Kmt2e	Nedd8		Prr5l
733	Luzp1	Wt1os	Cox14	Flrt2	Alg2	Sf3a3			Pqlc2	Htra1	Fuca1	Sf3b4	U2af2	Spred1		Xpnpep1
734	Rnf219	Capn2	Slc25a3	Agpat5	Nmt2	Eed			Sp100	Rbbp7	Plekha2	Eps8	Flywch1	Tpr		Spag9
735	Rpl5	Hmg20b	2310030G06Rik	Trmt6	Rnf11	Reep4			Serpinb8	Ncl	Rarg	Ywhae	Miat	Pdlim7		Spns2
736	Csde1	Clic4	Mllt3	Immt	As3mt	Polr3k			Ada	Kdelr2	Pdcd6ip	Syf2	Thoc7	Rbmx		Itm2c
737	Shisa4	Cttnbp2	Tecr	Nr2f6	1110032A03Rik	Uchl5			Rgs18	Smim3	Slamf7	Slc25a5	Epha7	Col8a1		Hecw2
738	Gltscr2	Plcd1	Atp11b	Yae1d1	Igsf21	Nudt5			Il16	Arid5b	Slbp	Ndufs5	Srsf4	Mmp14		Swap70
739	Ngf	Sdcbp	Pcbp2	Aldh7a1	Faah	Elovl7			Zyx	Chd3os	Map4k1	Eif2b2	Pcdh1	Efemp2		Gm16104
740	Pnn	Rras2	Vps72	Paics	Nefm	Psmd11			Arhgap19	Ncaph	Rpl35	Ptpn1	Psmd6	Vdac1		Rps20
741	Mfhas1	Fermt2	Scx	Smu1	Pcyt1b	Atp5o			Tbc1d14	Bri3	Igtp	Acadsb	Ubxn6	Ssbp3		Cers2
742	Pmepa1	Rpl8	Cmc1	Rbbp7	Ripply3	Ict1			Ebp	Cnep1r1	Dgat1	Snrpb2	Snrk	Banf1		Hyal2
743	Sdc2	Scrn1	Aktip	Phf5a	Pgap1	Hyal2			Tacc1	Myl7	Tespa1	Rbm22	Bcas2	2024-09-09		Slmo2
744	Wipi1	Dgcr6	Foxa3	Ndufb5	Akap8l	Prr13			Ubash3b	Tln1	Stx7	Eif3h	Tubb4b	Mmd		Gm8730
745	Upf2	Rab7b	Rab14	Nadk2	D730003I15Rik	Tgif1			Slc38a6	2024-09-10	Nr3c1	Gtf2h5	Kansl2	Syncrip		Nos3
746	Tenm3	Serpinb6b	Arhgef19	Rps18	Mrpl1	Kdf1			Osbpl11	Cmtm3	Lbh	Dll1	Rbbp4	Sapcd2		Spata6
747	Cdca7	Mpdz	Glmp	Cdc6	Fam43a	Eif4a3			Wdr26	Nap1l4	Rpl39	Stox1	Slc35f1	Tspan18		Nhp2
748	Bcl11a	Ptprs	Nucb2	Sdsl		Bzw2			Srd5a3	Prph	Phf11b	Tex30	Megf9	Rpl6		Plec
749	Cdk12	Cetn3	Clic1	Pla1a		Chchd1			Emc2	Mmp14	Ctsa	Trp53inp1	Vcp	Brd4		Hmox2
750	Rpl17	Ly6h	Qsox1	Ppan		Ddt			Arl11	Pop4	Kctd12	Gm10093	Ccng2	Notch2		Txndc17
751	Wls	Bnip3	Pqlc1	Rps14		Grb14			Rgs7bp	Ctxn1	Cd244	Pld3	Xrcc5	Slitrk5		Scn1b
752	Trpc5	Ndufa6	Pbx1	Ube2n		Mcm4			Cbl	Cdk5rap2	Rasgrp2	Ing4	Crem	Txlna		Mcf2l
753	Erc1	Gapdh	Dnajb4	Dnajb11		Pcbp1			Irf2	Mmp16	Epsti1	Sar1b	Acvr2b	H2afy		Ntan1
754	Trps1	Kcna1		0610007P14Rik		St14			Bscl2	Adgrg2	Ttn	Ndufab1	Erbb3	Nfyc		Exoc5
755	Rpl3	Wasf1		Srp9		Sf3b2			Clcn5	Prdx4	Map2k1	Oser1	Rnaseh2c	Tcerg1		Crk
756	Fndc4	Atraid		Cbx3		Cox5b			Nhlrc3	Trappc1	March2	Ccdc12	Krit1	Pknox1		Ppm1f
757	Rab18	Pappa		Rpl11		Psmb7			Crlf3	Krt14	Hes1	Ube3a	Chtop	Ssna1		Rnd1
758	Nenf	Fndc4		Psmb10		Pgam1			Nudt9	Mpdz	Anxa6	Med27	Sf3b1	Rpl23a		Polr1d
759	Mvd	Psmg4		Pin1		Calm3			Lat2	Pcm1	Rps12	Pbld2	Timm22	Ssb		Ap2m1
760	Timm44	Amotl2		Denr		Pgm2			BC017643	Ormdl3	Mob3a	Actl6a	Mageh1	Cdc16		Bnip3l
761	Nvl	Malat1		Gjb2		Pbdc1			Acer3	Wisp1	Plekho1	Pnmal2	Ppp2r3c	Erh		Bcam
762	Gon4l	Bcl7c		Prmt3		Mrpl33			Fam96a	Ctps	Sms	Ufd1l	Ckap4	Ubap2l		Rps11
763	Cwc25	Pcsk5		Ak6		Dscc1			Sgpl1	Fam195b	Eif3f	Emc4	Wbscr17	Cdca5		Slc16a3
764	Ddx46	Avpi1		Ube2s		Dnaja1			Dnm2	Tgs1	Dazap2	F11r	Ccdc50	Ncbp2		Lta4h
765	Ltbp1	Kdelr2		Tnfaip8		Afm			Rel	Anxa1	Btk	Fbxo44	Plppr3	Pop4		St8sia4
766	Actb	Tbxa2r		Rpl35		Tomm20			Ech1	Tapbp	Prcp	Glud1	Gdap1l1	Timm22		Eva1a
767	Gpatch8	Tm2d2		Gnb2l1		Klf3			Glipr1	Banf1	Gm26522	Ube2g1	Slit2	Tceb2		Lats2
768	Rpl22l1	Ano6		Las1l		Taldo1			Pkig	A830082K12Rik	Tpst2	Ap1m2	Raly	Nap1l4		Fam181b
769	Rpl7a	Rab9		Anpep		Epb41l5			Itgam	Crabp2	Mtdh	Dcx	Pin1	Trp53		Ednrb
770	Hoxa3	Rab38		Oard1		Eif2s1			Flcn	Eif4g2	Slc20a1	Emc7	Arl6ip1	Clasp1		Sgce
771	Crispld2	Dbp		Tmem266		Wapl			Ddit3	C1qtnf4	BC028528	Srsf10	Rabep1	Eif4e		Gm42418
772	Ralb	Efna2		Nifk		Hddc2			Camk2d	Trim28	Gngt2	Stxbp2	Luc7l3	Atf2		Gbp9
773	Wsb1	Polr2e		Chst2		Adh5			Irf1	Rdh14	Ccdc12	Fip1l1	Mrto4	Nhsl2		Sema6a
774	Rpl10-ps3	Mpv17		Asph		Ywhah			Hgsnat	Carnmt1	2810474O19Rik	Ube2l3	Srsf6	Ect2		Tanc1
775	Mirg	Cox7a2l		Wdr74		Atp5h			Commd7	H3f3b	Klf13	Rraga	Hmgn1	Nkain4		Litaf
776	Col27a1	Tmem141		Aurka		Cdkn3			Bak1	Parva	Rab8b	Ddr1	Jarid2	Ddx1		Ccnjl
777	Dennd2a	AY036118		Cdv3		Mrps18c			Mtdh	Whsc1	Relt	Rnf8	Rhob	Efnb1		Ttc28
778	Gli3	Abhd8		Nol7		Haus5			Ptprj	Med19	Rpl17	Skp1a	Ucp2	Spdl1		Oxa1l
779	Fundc2	Ptger3		Nap1l1		Brcc3			Gm6377	Rnps1	Ech1	Baz2a	Ssbp3	Gm11808		Tmem2
780	Abhd8	Lamb1		Trappc6a		Npm1			Aldh3b1	Mapre1	Smc2	B630019K06Rik	Hras	Traip		Hmgn5
781	Maf	Adam33		Cirh1a		Fam60a			Pip4k2a	Ado	Ap3s1	Rab1a	Ptk2	Mtf2		Cox5a
782	Gnb4	Rasl11a		Cops7a		Nt5dc2			Rab7b	Hp1bp3	AF251705	Atg101	Psmb6	Lix1l		Mrps6
783	Impdh2	Fam107b		Aqp4		Ncaph			Fcgr4	Arl6ip5	Pip4k2a	Ube2j2	Snrnp70	Haus4		Picalm
784	Npm1	Hbp1		Fdx1		Cyb5r3			Stxbp2	Lsm4	Rfc2	Atp6ap2	Mat2a	Rpl37		Marcks
785	Tro	Snap47		Ccnd2		Prmt3			Dpp7	Fam83d	Il17re	Tmem86a	Shc1	Armcx6		Chmp6
786	Sh3bp5	2610001J05Rik		Ddx56		Rpf1			Nr4a1	Hnrnpu	Syk	Ubald1	Psmd4	Stbd1		Mapre2
787	Med13l	Acot7		Sf3b4		Gulo			Cd300lf	Pkn2	Arid3a	Inppl1	Tomm20	Lamtor3		Cdc42ep1
788	Cox6b2	Pdrg1		Gata4		Naa50			Dgkz	Brd3	Uvrag	Hnrnpa2b1	Nes	Cntln		Taok2
789	Ccdc137	Cachd1		Ndufb4		Higd1a			Neu1	Coq7	Rps23	Cldn12	Bnip2	Amotl1		Fbxw2
790	Smarca1	Otub1		Mrpl54		Srpk1			Pea15a	Sema3a	S100a11	Chd6	1110038F14Rik	Snrpd2		Arf1
791	Tspan9	Fgf13		Swi5		Ppig			Stx4a	Slc16a1	Agpat5	Carkd	1500009L16Rik	Rps26		Ptms
792	Psmd9	Haghl		3110082I17Rik		Ddx1			Txnip	Jam3	Tuba8	Ccdc174	Rsl24d1	Nefl		Gna11
793	Zc3h15	Plod1		Tmed5		Hnrnph3			Ripk1	Arf5	Ppp3ca	Bsg	Psmc1	Rexo1		Tnfaip2
794	Ehmt1	Pdia6		Mrpl33		Aif1l			Parvg	Ttc3	Tab2	Cycs	Fibp	Rpl15		Uqcrq
795	Wbp4	Stub1		Sep15		2610035D17Rik			Calm1	Col6a1	Rock1	Sbk1	Fam220a	Ctcf		Tgfb1i1
796	Cntfr	Hist3h2a		Lars		Srrt			Gapdh	Tspan5	Tlr2	Rbm18	Fbn2	Prpf38b		Vgll4
797	Caprin1	Man1a		Mrpl51		Rpl7			Jmjd1c	Rbbp4	Trps1	Cspp1	Nusap1	Zcrb1		Pxdc1
798	Tmem132c	Kifap3		Mrpl36		Terf1			Cnpy3	Hist1h4d	Emid1	Hnrnpab	Tln2	Ilk		Yaf2
799	Scmh1	Thsd4		Spc25		Kif12			Dbnl	Vamp3	Tpr	Slc35b1	Dpf2	Loxl2		Sec13
800	Ramp1	Arf1		Exosc1		Myg1			Wsb1	Sar1a	Ppp1r10	Lynx1	Lsm6	Actn1		Mapre1
801	Igdcc4	Piezo1		Itgb3bp		Tmem14c			Reep3	Xpo1	Sirpa	Ttc1	Strap	Rsrc1		Sox13
802	Arl13b	Crym		Atp5k		Rer1			Commd8	Ehd1	Pnp	Kin	Prpf31	Nudcd2		Ccdc85a
803	Bnc2	Kctd10		Skp1a		Pold2			Sbf2	Rpa1	Mospd3	Fam220a	A730017C20Rik	Nudt21		Rhog
804	Zfp57	Mat2b		Fh1		Tex30			Pik3cg	Kpna2	Rapgef6	Adam10	Scoc	Stub1		Adm
805	Pycard	Clip3		Rars		Rbm17			Mapkapk2	Aqp1	Gna15	Psma1	Supt4a	Ywhaz		Caskin2
806	C1qtnf6	Cdipt		Bcat2		Rp9			Sash3	C330027C09Rik	Eml4	Ckb	Smpd3	Zc3hc1		Fam53b
807	Nxn	Dkk3		Rpl14		Naca			Card19	Cep89	P2rx4	Rab14	Csde1	Exosc8		Hmcn1
808	Trio	Ski		Cenph		Slc25a3			Scarb2	Scaf11	Dkkl1	Mdh2	Rbm24	Aida		Eef1a1
809	Dguok	Aard		Arl6ip4		Muc1			Triap1	Mpzl2	Ocel1	Nelfcd	Coq7	Nono		Fam57a
810	Spred1	Rhoa		Psmb7		Pah			S100a1	Cenpc1	Rpsa	Slco4a1	Mtap	Mlf1		Rab11b
811	Tbxa2r	Sec11a		Eif3e		Slc15a2			Lpxn	Mpped2	Rab8a	Pafah1b1	Tspan18	Raph1		Adgrl2
812	Sar1a	Gm9493		Usp1		Snrpa			Cyb5a	Sesn3	Ralgps2	Eif3e	Rftn2	Pnn		Glo1
813	Xpnpep1	Bbx		Aurkb		Anapc5			Klf4	Capns1	Aup1	Srrt	Tsc22d3	Srrt		Pik3c2b
814	Ctdspl2	Celf4		Eif3i		Nhp2			Pygl	Hnrnpk	Anxa11	Efna4	Slc22a17	Cebpz		Nfkb1
815	Lsamp	Crb2		Pomp		Fignl1			Cited2	Foxp1	Prelid2	Pink1	Tcerg1	Sh2d3c		Epn1
816	Asap1	Ip6k2		Naca		Capg			Gng12	Rad18	Tox	Lbp	Eif3b	Wdr70		Pak2
817	Taf7	Gaa		Rfc3		Suclg2			Sash1	Fam111a	Rab10os	Arvcf	Cbx1	Cyth3		Kti12
818	Luc7l2	Ube2w		Rpl9-ps6		Tcerg1			Taf6l	Fndc4	N4bp2l1	Mxd1	Rraga	Tsen34		Atp2b4
819	Ccne1	Abhd16a		Rrp9		Rhov			Tcirg1	Ctbp1	Nadk	Steap2	Psme3	Abhd8		Plekhg1
820	Mcm3	Prmt2		Galnt7		Anxa4			Tmem192	Nsmce2	Crlf2	Zfp329	Tia1	Eif4ebp1		Lsm2
821	Rab26os	Matn4		Spr		Onecut1			Cib1	Foxf1	Mnda	Vdac2	Dhx30	Arf4		Hk1
822	Fam132a	Pnrc1		Pithd1		Hsp90b1			Elf1	Htra2	Efhd2	Halr1	Slmo2	Kif26b		Brk1
823	Bmp1	Fundc2		Tsga10ip		Plscr1			Ssbp4	Rasl11a	Trim30a	Npdc1	Hdgfrp2	Nup37		2024-09-10
824	Zfp580	Egln3		Orc6		P4ha3			Anxa6	Myh8	Elk3	Med31	Elovl4	Ywhab		Myo18a
825	Raph1	Rasgrp2		Mvb12a		Phf5a			Soat1	Alyref	Swap70	Ube2r2	Cdv3	S1pr2		Mylk
826	Atrnl1	Grn		Syne4		Vmp1			Fam21	Wasf1	Max	Ppib	Smchd1	Opcml		Pros1
827	Tcea1	Vcl		Mrps12		Cdc6			Cd180	Pygb	Nubp1	Bcl2	Psmc6	Arhgef25		Tmem184b
828	Clasp1	Klhdc8b		Eed		H2afy			Pdcd6ip	Gbp2	Mycbp2	Scp2	Fam181b	Mapkap1		Eif3f
829	Dnajb4	Pdcd6		Pdia5		Pih1d1			Incenp	Neo1	Rpl10	Pisd	Asrgl1	Rsl24d1		Myadm
830	Rps4x	Rem1		Ola1		Rnf128			Xlr	Clic4	Maff	Dmpk	Fam171b	Rbm27		Psmb9
831	Pdzd2	Fam171a2		Mrpl57		Uqcrfs1			Anxa5	Akirin2	Coro2a	Hacd1	Pcdh17	Rest		Rab2a
832	Copa	Il6st		Pak1ip1		Mrpl50			Scoc	Zfp580	Rps15a	Eml2	Nxt1	Ing1		Rwdd1
833	Phf21a	Angptl2		Yars2		Osgin1			Abcg3	Fbn1	Prex1	Med7	Gipc1	Morf4l2		Gm13305
834	Bcl10	Rnf187		Rpl23a-ps3		Calm2			Gm26740	Haus8	Rpl13a	Vamp7	Nde1	Cdh2		Ahr
835	Rpl13a	C1rb		Tomm7		Sdsl			Tnni2	Dock11	Kdm6b	Pnn	Slc38a1	Hnrnph3		Nras
836	Sncaip	Myl9		Ghr		Rest			Fam46a	Lox	Sub1	Nup88	Ssrp1	Psmd9		Mob2
837	Pard6g	Plod2		Cdca7l		Bola1			Akr1b10	Rab9	B9d2	Caprin1	Bclaf1	Atf1		Ctdsp2
838	Sdc1	Fnta		Bola2		Hsd17b12			Borcs6	Dnmt1	Ripk3	Baiap3	R3hdm4	Hnrnpa3		Rnf144a
839	Wdr26	Smdt1		Rps11		Ccar1			Elmo1	Praf2	G6pdx	Banp	Nrp1	Odf2		Bcl10
840	Nsrp1	Lysmd3		Cpsf3		Ndufc2			Mrpl28	Tuba1a	Nfkbil1	Mff	Mrps33	Abcg2		Tubb5
841		Cgnl1		Ppp1cc		Luc7l3			Lair1	Myl9	Gbp7	Txnrd1	RP23-291B1.2	Gsk3b		Ehd3
842		Rnf13		Lgals2		Erp29			Batf	Mrpl49	Arhgap18	Atp5b	Nudt5	Bzw1		Fam174a
843		Tceb2		Rpn1		Tecr			Nadk	Thrap3	Ms4a6d	Ccar1	H2afv	Taf7		Eid1
844		Nucb1		Psmc3		Rprm			Psme2	Arf1	Stk19	Rab18	Dync1li1	Rgcc		Eif1
845		Ccdc107		Noxa1		Rpf2			Lepr	Sumo3	Orai1	Ythdc1	Cnih4	Rad51		Dpagt1
846		mt-Co3		Tfam		Fcf1			Dusp3	Casp8ap2	Zc3h12a	Eci2	Rsl1d1	Rps24		Cdc42bpb
847		Lhfpl3		Mecr		Hpn			Adam17	Foxp2	Ankrd13a	Lman2l	Bod1	Arl13b		Stx2
848		Anapc5		Adrm1		Kifc1			B3galnt1	Fam107b	Serp1	Dync1li1	Ube2e1	Tgs1		Chmp2b
849		Gm21092		Psmc1		Nup62			Vasp	Cnih1	Ogt	Snrpa1	Scrg1	Sgk1		Ppt2
850		Ly6e		Ube2j2		Ptp4a1			Derl1	Pole4	Isg15	Paip1	Ctnnal1	Cd302		Mtus1
851		Manbal		Ctage5		Nrm			Rogdi	Flna	Wipf1	Tbc1d16	Dhx36	Emsy		Tmem50a
852		Ap1m1		Fkbp2		Bcas2			Slc29a3	Syne2	Fgr	Ndufb7	Rrp1	Gpatch8		Calu
853		Sgcb		Taldo1		Cep89			Itga9	Actb	Rpl18a	Dnase2a	Ddx39	Ripk3		Xiap
854		Mthfsd		Slc38a3		Cdc42ep1			Dscr3	1810037I17Rik	Ywhah	Golga1	Azin1	1700025G04Rik		Ciapin1
855		Polr2h		Rbm17		Tmem256			Gna13	Orc6	Lfng	Ctps2	Fyttd1	Sox6		Notch4
856		2310022B05Rik		Rras2		Nop10			Slc17a5	Gja1	Pdlim2	Cib2	Erf	Fam110b		Sugt1
857		Dad1		Ube2t		Bccip			Elovl1	Haus4	Tank	Dynll2	Zfp644	Sox4		Gbp7
858		Plscr3		Rnf187		Gart			Dusp22	Ccne1	P2ry14	Cacna1a	Mcrs1	Srsf5		Dennd5b
859		Pdha1		Rtcb		Sfxn1			2610507B11Rik	Srsf1	Prdx3	Atp8b1	Praf2	Col6a3		Actr2
860		Tceal3		Mecom		Eny2			Phf11b	Supt16	Nfatc1	H2-Ke6	Rabggtb	Tcea1		2024-09-02
861		Inafm1		Hnrnpu		Sf3a2			Ikzf1	Impdh2	Rin3	Ssbp3	Erdr1	Caprin1		Elk4
862		Lzts2		Tacc3		Tpbg			Fcho2	Prmt1	Prkcb	Dusp10	Tmeff2	Tubb2b		Hras
863		Guk1		Msrb1		Mbd3			Dnajc13	Impa2	2310001H17Rik	Krtcap3	Armc1	Ralb		Emc3
864		2410002F23Rik		D8Ertd738e		Mrpl35			Mgat1	Rdh10	Pygl	Slc44a3	Fyn	Mettl9		Hook3
865		2210013O21Rik		Mgll		Mdh2			Zswim6	Rtf1	Tceb3	Ppil4	Pafah1b2	Lnp		Tapbp
866		E030030I06Rik		Dtnb		Cct2			Brms1	Snrnp25	Uba7	Mrps33	Rps3	Smarca4		Ier2
867		Fkbp14		Gtf3a		1110001J03Rik			Man1a	Abhd8	Sigirr	Lamp1	Eef1e1	Ak6		Cr1l
868		Rbbp9		Sumo3		Gpm6b			Fnbp1	Ssb	Pnpla2	Hypk	Pabpn1	Mrpl51		Plekha1
869		Dcaf6		Ddx18		Rhno1			Nipsnap3b	Rac1	Hist1h1b	Grin3a	Ptpn11	Hnrnpa2b1		Phldb2
870		Lmna		Prpsap1		Slc44a3			Slc6a6	Tmem132a	Rad50	Zwint	Ralgds	Ankle1		Spns1
871		Map1a		Ndufb11		Fam83d			Cdc42se2	Fam69a	Myd88	Phf23	Phip	Ptk7		Pdcl3
872		Tmem9		Idi1		D8Ertd738e			Snx9	Bora	Susd3	Ranbp3	Fndc4	Tmem108		Lpcat1
873		Stx4a		Nxt1		Plk4			Tgfbr2	Cdc45	Pdha1	Cnih4	Aida	H1fx		Mndal
874		Fam110b		Hsd17b10		Bola3			Myo1g	Rasgrp2	Ifnar2	Kdm5a	Ube2i	Sf3a1		Slfn5
875		Ssr3		Dus1l		Tfam			Ccnl1	Dgcr6	Syf2	Litaf	Atp6v0d1	Tmem243		Tubb2a
876		Spock3		Mia		Cox20			Sh3kbp1	Cenpp	Rbck1	Mid1ip1	Psma7	Rnd3		Eif4h
877		mt-Nd2		Ccdc167		Atp11b			Hivep3	Timm17b	Znrf1	Mex3a	Ctnnbl1	Dhx30		Fas
878		Crim1		Snrpb		Srrm2			Swap70	Lbr	Gapdh	Enho	Desi2	Pdzd11		Cnih1
879		Lsamp		Serf2		Ppp1r7			Aim2	Cenpl	Sla2	Sdccag3	Brd4	Iws1		Epn2
880		Pgm2		Mcm3		G2e3			Atp6v0a1	Wbp11	Ypel3	Capn10	Lsm4	Pdcd11		Map2k3
881		Rab11b		Mthfd2		Cetn3			Lamtor2	Gdi2	Lilr4b	Tbc1d9	Srsf1	Itgb1		Fes
882		Uap1l1		Lamtor2		Bzw1			Rtfdc1	Efna3	Il3ra	Orc4	1700037H04Rik	Whsc1		Ifitm2
883		Hmgcl		Ppp4c		Clint1			Slc37a2	Nfia	Creg1	Eif5	Cul5	Pls3		Eogt
884		Micu2		Mrpl46		Exo1			Mylip	Arhgef25	Pet100	mt-Co2	Trim2	Prpf38a		Commd7
885		Mesdc2		Apitd1		Slirp			Acss1	Armcx2	Rab5c	Elavl4	Ctcf	Bora		Inpp5k
886		Chmp2b		Rpl36		Litaf			AI467606	Maf1	Hexa	Med10	Dlgap1	Ndufa2		2900026A02Rik
887		Ptpra		Isoc1		Commd3			Bach1	Nup62	Herpud1	Snn	Zfhx2	Cdc37		Capn2
888		Arhgdia		Gstm7		Trip13			Rap1gds1	Fgf5	Ndufa1	Msantd4	Psmd3	Ehmt1		Capza2
889		Pacsin2		Prmt5		Timm17a			Asap1	Cldnd1	Sema4a	Gprc5b	C1qbp	Rfc3		Hoxd4
890		Sox12		Nmd3		Srsf10			Fosb	Hs6st2	Naga	Cir1	Cdc20	Axl		Arhgap25
891		Chpf		Zfp593		Mrps15			Lilr4b	Oaz2	Mthfd2	Sh3glb1	Mff	Rnf167		Srgap2
892		Hddc3		Exosc3		1110004F10Rik			Bcl2a1a	Nxt1	Rps28	Diablo	Sltm	Knop1		Wnk1
893		Rab32		Nutf2		Thrap3			Bnip3	Arhgap10	Itgam	Tor1aip2	Mthfd2l	Nvl		Msx1
894		Anapc11		Mrpl30		Ppdpf			Bin3	Tcf3	Adrb2	Ewsr1	Mrpl51	Hmgxb4		Ralgps2
895		Serpinb9		Aifm1		Nup93			Snx20	Fnbp1l	Ppfibp2	Rtn4	Pard6g	Cep55		Pfkl
896		Zfp277		Rpl13		Aaas			Glrx	Ska3	Kcnab2	Phf20l1	Eif4e	Eef1b2		Chmp3
897		Mapk3		Pus1		Timm9			Slc43a2	Tiparp	Zmiz2	Akr1a1	Cep44	Wsb1		Twf2
898		Tmem237		Trim27		Lipt2			Tln2	Fermt2	Cx3cr1	Nfix	Srrm3	Eif3a		Ctnnd1
899		Lrrn4cl		Tomm70a		Sypl			Reps2	Cdc37	Vim	Zmat2	Eif3l	Rab13		Rock2
900		Rpain		Hrsp12		C330027C09Rik			Bst2	Dscc1	Cd200r1	Fbrsl1	Ramp3	Asxl3		Zyx
901		Cdh3		Psma5		Gm14226			Sh2b3	Wwc2	Commd4	Tiprl	Rnf7	Supt5		Map4k5
902		Ddr1		Coa3		Immt			Higd2a	Zfp185	Hk1	Ubl5	Cdk2ap1	Rpl22l1		Cd2ap
903		Renbp		Hnrnpa2b1		Casp8			Plaur	Ppp2r2a	Tmem154	Usp3	mt-Atp6	Prdx4		Frmd8
904		Ado		Dtd1		Ctnna1			Fchsd2	Pmm1	Trp53	Tpst1	Zscan21	Tns1		Spry1
905		Egln2		Pcbp2		Sbspon			Frmd4b	Polr2j	Gpr141	Rab2a	Zfp638	Ctsk		Banf1
906		Bst1		Sapcd2		Acaa2			Gna12	Ncbp2	Sdcbp	Sf3b2	Rangap1	Rbbp6		Cdc42ep2
907		Fn1		Sucla2		Larp7			Pnkp	Zfp664	Ubald2	Mien1	Chl1	Sdk2		Irf2
908		Wdr86		Creld2		Adi1			Arl5c	Plekhh2	Itpkb	Syt5	Lsm3	Gng2		Nuak1
909		2410015M20Rik		Btf3		Cdc45			Il10ra	S100a16	Rpl22	Ppme1	Psmb3	Denr		Stc1
910		Klf4		Cnih4		Tmed9			Plgrkt	Zwint	Ywhab	Tmem57	Ube2l3	Nab2		Mrpl4
911		Nedd8		Poldip2		Plekhb1			Ifi35	Prrg3	Jakmip1	Rbpj	Hnrnpu	2310036O22Rik		Klf10
912		Camk4		Tubb5		Tax1bp1			Sirt7	Fam216a	Lck	Spcs1	Mob4	Pcnp		Camk4
913		Npc2		Prpf38a		Sephs2			Eea1	Cdkn2c	Spg21	Cnksr3	Hnrnpl	Troap		Tmbim1
914		Rpl7		Ormdl2		Eif5			Mertk	Ankle1	Rpl38	Sars	Ict1	Cdc42ep4		Adam10
915		Lrrc1		Ict1		Col2a1			Med8	Pgm5	Etv3	Emid1	Arpc1a	Smarcd1		Tmem14c
916		Col6a5		Coq3		Cyb5a			RP23-81F19.2	Tmem167	Mob1a	Maged1	Hip1	Rps17		Psmc4
917		Zfp664		Rps19bp1		Impdh2			Cln3	Gnb4	Ralbp1	Pdrg1	Iws1	Fzd2		Ebf3
918		Gm9844		Fam103a1		Sf3b6			Fbxo6	Fzd2	Nubp2	Cnot4	Rgmb	Ddx24		0610037L13Rik
919		Dctn6		Rpl7		Dnaaf2			Txndc17	Clmp	Chd2	Nkiras2	Tbx3os1	Eif1ad		Rps2
920		Ankrd46		mt-Atp6		Tsg101			Ikbkb	Hmgxb4	Rab27a	2610301B20Rik	Eif1ad	Rpl41		Gabarapl1
921		Nek7		Kif20b		Hnf1b			Slc35c2	Arl2bp	Rps7	Ccdc47	Atf4	Gm1673		2010111I01Rik
922		Gale		Eif3l		Polr2c			Bid	Ap1m1	Derl1	Ddx39b	Stip1	Mrps17		Aprt
923		Plpp3		Stard7		Gja1			Hras	Cnih2	Ghitm	Yaf2	Ppp4r2	Polr2a		Dnaja2
924				Rcc1		Psmd6			5031439G07Rik	St8sia1	Arhgap4	Scoc	Zfp821	Ptk2		Klf3
925				Sap30		Ddx52			Srgap2	Ndufa5	Rps4x	Cdk8	Hoxd3	Tdp1		Klf9
926				Sumo2		Atp5c1			Il13ra1	Guk1	Akna	1700123O20Rik	Tra2b	Ubald2		Nde1
927				Atp5g3		Llph			Lrrc58	Armcx1	Pbxip1	Eif2s1	Smc4	Usp14		Snn
928				Dera		Elf3			Cdk2ap2	Timm22	Gm20186	Raly	Fam19a5	Metap2		Cdc37
929				Mrpl2		Tfrc			Wipf1	Skap2	Il6ra	Tmem50a	Tcf3	Ctr9		Elovl5
930				Ptcd3		Prpf38a			Ddx26b	Prpf19	Pkib	Rbbp6	Rpsa	Ahctf1		Gle1
931				Tmem171		Chtop			Pmp22	Efna4	Cdk9	Hmces	Rab13	Wac		Arl2bp
932				Pkm		Mesdc2			Slc35f6	Chtop	Tnfsf14	Cdc73	Tpt1	Rpl21		Foxn3
933				Add3		Pcbp2			Bmp2	Ly6e	Rpl6	Fgfr4	Nab2	Adrb3		Adss
934				Mtx2		Rps3			Sec14l1	Hsp90b1	Ebp	Arrdc4	Baz1b	Pros1		Oit3
935				Rbmxl1		Utp3			Plod1	Ythdc1	BC021614	Tmsb4x	Col5a2	1810058I24Rik		Ndufa4
936				Sec11a		Kif4			Ptp4a3	Irak1bp1	Rbfa	Slc31a2	Ctps	Cep89		Atp1b3
937				Abce1		Ctnnb1			Usf2	Nsmce1	Atp8b4	2024-08-01	Clpb	Capn6		Hspa8
938				Cisd2		Brd3			Rcsd1	Calm1	Pkp3	2610001J05Rik	Nfasc	Kif18a		Stx4a
939				Vmp1		Agpat2			Hnrnpf	C2	Sema4d	Vbp1	Tmcc1	Uhrf1		Hoxb5
940				Dctd		Prpsap1			Nmt1	Nek6	Cenpa	Smarcad1	Bpgm	Plpp1		Kif26a
941				Exosc2		Chmp2b			Themis2	Elovl5	Psd4	Dlgap4	Slc43a3	Cyth2		Sbds
942				Acadl		Hnrnpr			Sema4a	Plce1	Tuba1c	Bnip3l	Meis1	Tsc22d1		Ripk3
943				Pum3		Gspt1			Ccdc22	Fam69b	Fh1	Vipas39	Cacybp	Ncl		A330009N23Rik
944				Prpf19		Ndufa9			BC005537	Pold2	Rbm3	Insig1	Ccni	Eif4a3		Nedd9
945				Timm13		Scara3			Arl8b	Ttl	Chst12	Bmp1	Whsc1	Nsrp1		Atp5j
946				Mrpl1		Clic6			Kras	Mrpl33	Pex16	Papola	Akirin1	Rps15		Rasa4
947				Dcaf13		Cenpp			Slc12a9	Plxna4	Mboat7	Top2b	Syn2	Dzip3		Capzb
948				Mak16		Ormdl1			Pyhin1	Prpf38a	Plekhb2	Psmd5	Clspn	Eef1g		Mmp15
949				Snrnp27		Btf3l4			Lamtor5	Sf3b2	Acot9	Ppp2r1a	Zfp462	Mum1		Arf6
950				BC003331		Sf3b5			Cyp27a1	Hotairm1	Mis18a	Mtpn	Farsa	Npr3		Stab1
951				Tamm41		Papola			Atox1	Efnb1	Fam53b	Atp6v1h	Lef1	Arhgap10		Bace2
952				Nmral1		Sucla2			Epb41l2	Rsrc2	Aif1	Mmadhc	Psma3	Cfl2		Ptbp3
953				Abcf2					Stard3	Col12a1	Mxd1	Tmod3	Pop4	Rad18		Lbr
954				Sod2					Map2k1	Csrp2	Ifnar1	Psmb5	Cyc1	Srek1		Bag3
955				Ssr4					Gba	Sigmar1	Ccdc88b	Capza2	Mrpl28	4930579G24Rik		Vcl
956				Slc1a5					Tlr7	Anxa3	Slc25a5	Dennd1c	Tram1l1	Tnfaip8		Ube2g2
957				Tom1l1					Crip1	Col5a1	Cdkn1b	Mkrn1	Sgip1	Snrnp70		Bcr
958				Rad51ap1					Tapbp	Gsdmd	Cklf	Dnaja2	Tdg	Sfswap		Zfp36l1
959				Gtf2h5					Zfp622	F11r	Ap1m1	Strap	Pcnp	Casp8ap2		Cap1
960				Mknk1					Acsl5	Pgls	Stat4	Ctnna1	Strn4	Dcp2		Ddx39
961				Tspan6					Etv5	Figf	Mier1	Tmeff1	Puf60	Phip		Rasa1
962				Dnaaf2					Map3k8	Pcsk5	Acer3	Morf4l1	Usp22	Ppia		Gramd1a
963				U2af2					Sap30	Cdc23	Rnasel	Ppp1r11	Zfp553	Hnrnpul1		Ppp1r18
964				Alyref					Pon2	Srrm2	Orai2	Trappc3	Bod1l	Krt10		Erf
965				Prpf40a					Tradd	Apbb1		Dnm2	Cks1b	Myl12a		Tpgs1
966				Morf4l2					Usp8	Cdh3		Chd3	Lix1l	Clmp		Ssna1
967				Echdc2					Lsm10	Ssbp2		Ngdn	Pbk	Klf4		Crem
968				Lbh					Gbp3	Nrbp1		Bclaf1	Mphosph10	Rpl36-ps3		Epb41l2
969				Atp5a1					Clec5a	Emd		N4bp2l2	Zfp326	Mtap		Emc2
970				Dazap1					2024-09-09	Mcrs1		Psma6	Mrpl12	Sdhb		Mgat2
971				Sumo1					Cmpk1	Mprip		Map9	Yrdc	Ncapg2		Urm1
972				Pmpca					Cnppd1	Timm50		Aacs	Smc3	Saal1		Nudt9
973				Gorasp2					Nfxl1	Bcl2l12		St18	Yae1d1	Ube2t		Rfk
974				Gbas					Fam65b	Mrpl13		Pex7	Mrpl11	Angptl2		Tal1
975				Parp1					Card9	Atp5o		Lsm8	Bzw1	Ccdc59		Fam64a
976				Mrpl39					Vav3	Glipr2		Dab1	Ccna2	Nkd1		Tpt1
977				Tpx2					Ing2	Fgf13		Atp6v0d1	Cdc37	Rfc4		Rap1b
978				Pop5					Plxnb2	Ankrd11		9530068E07Rik	Got2	Lmnb2		Pttg1ip
979				Cldn3					Nceh1	Rpain		Zc3h14	Prima1	Vgll4		Snapc5
980				Med29					Zfp385a	Timm13		Thoc7	2310036O22Rik	Rps19bp1		Cttnbp2nl
981				Ccne2					Camk1d	Nhp2		Rpf2	Cbx3	Rdm1		Ppp2r5a
982				Tmem70					Klf3	Mpp5		Dach1	Chrnb4	Lsp1		Exoc6
983				Ftsj3					Bri3	Yaf2		Vta1	Manbal	Smndc1		Fkbp7
984				Melk					Atp6v1c1	Snrpd2		Actn3	Bop1	Ccdc124		Ddrgk1
985									Dnajb1	Pfdn2		Bex1	Nolc1	Cwc15		Mcl1
986									Pak2	Ost4		Slc17a5	Sac3d1	Ift74		Laptm4b
987									Dock8	Hacd4		Cfap20	Zfand6	Gpsm2		Ptgs1
988									Gmip	Emc8		Mrpl24	Hspb2	Snrpa1		Fam65a
989									March1	2700029M09Rik		Ppil2	Smarcad1	Mid1		Actl6a
990									Sgk3	Golm1		Tet3	Scand1	Cnot4		Mllt4
991									Tor3a	Sh3gl1		Mlx	Mis18bp1	Zfr		Ppp1r11
992									Eps8	Amotl2		Rpl37a	Tspan17	Khdrbs1		Crlf3
993									Cxcr4	Cd248		Srek1	Nup93	Nhp2l1		Tbkbp1
994									P2ry13	Efna2		Kif21a	Igfbp2	Scmh1		Arpc2
995									Ubtd1	Hn1l		Ccdc59	Fbxo44	Peli1		Adgrg3
996									Rnf166	Spag7		Usmg5	Rnf165	Fndc4		Ppp2r2a
997									Hip1	Smchd1		Slc25a51	Nap1l1	Osr1		Mprip
998									Tex264	Zyx		Thoc2	Mapt	Btg1		Kcna5
999									Ccr5	U2af1		Psmc3	Dync1i2	Upf2		Syt15
1000									Nipa2	Mest		Deptor	Stx12	Rpl37a		Saraf
1001									Mtus1	Etaa1		Lsm14a	Gramd1a	Tomm22		Cmtm6
1002									Cd38	Ltbp4		Synpr	Grsf1	Zc3h18		Rab1b
1003									Epsti1	Tma7		Hid1	Senp6	Zfp260		Yif1b
1004									Bcl2a1d	Ttk		Cisd1	Slc24a5	Lzts2		B4galt4
1005									Cd37	Mlf2		Fgd6	Rtkn	Tmem167		Crmp1
1006									Git2	Parm1		Dhx40	Ptprs	U2surp		Hnrnpf
1007									Lacc1	Srsf11		C2cd4c	Cpsf3l	Penk		Cdc42ep3
1008									Ripk3	Cnn2		Wsb1	Uba2	Sepw1		Gm9844
1009									Tfe3	Sec13		Echdc2	Zfhx4	Arglu1		Shroom2
1010									Arf6	Mdfic		Parl	Samd14	Armc1		Cyb5r1
1011									Tmem140	Larp7		Rnf167	Kdm5b	Nup93		Tpgs2
1012									Sdc3	Nsmce4a		Gmps	Hmcn1	Dnlz		Uvrag
1013									Tle4	Gpsm2		Tsn	Fxyd6	Med4		Rai14
1014									Rnf141	Pin1		Ppp5c	Hnrnpm	Anapc15		Tsc22d1
1015									A230046K03Rik	Vbp1		Kctd5	Med22	Mrpl20		Ptk2
1016									Ptpn7	Rab11b		Exosc4	Dhx9	Bcas3		Gbp4
1017									Crlf2	Gps1		Dusp23	Ctgf	Mrpl28		Gatsl3
1018									Acvrl1	Bnip2		Rbm5	Cd151	Bod1l		Ppp1r13b
1019									Nlrp3	Tmem119		Pcnp	Ncl	Gm10263		Nhsl2
1020									Bad	Smarcd1		Abcf2	Rbm4b	Zcchc10		Pcp4l1
1021									Gbp9			Nipa2	Ppp2r2d	Bloc1s1		Ssbp4
1022									Pik3cd			Msi1	Nemf	Mmp16		Itsn2
1023									Zc3hav1			Ints10	Ss18	Dnm3		Arhgef5
1024									Ifnar1			Tmem234	Rsu1	Klhdc10		Dbn1
1025									Slc25a5			Fscn1	Trim59	Snrpd3		Ankrd29
1026									Pros1			Rbm8a	Ppp1r11	Gstk1		Osbpl9
1027									Siglece			Dpysl5	Pin4	Gt(ROSA)26Sor		Rftn2
1028									Hps3			Atp6v0e	Pgls	Cfl1		Gne
1029									Gpr137b			Idnk	Ndufs5	Rpl8		Tbxa2r
1030									Acp5			Suv420h2		Sumo1		Akt1s1
1031									Snx17			Nr2f6		Polr2i		Impdh1
1032									Cklf			2510002D24Rik		Mum1l1		Dazap2
1033									Prex1			Bnip2		Med13l		Tmcc3
1034									2310011J03Rik			Ttc8		mt-Nd1		Hoxb7
1035									Trpv2			Gng13		Bcl10		Eif3e
1036									Tnfrsf21			Apool		Proser1		Cfl2
1037									Gpr146			Ndufa4		Mlf2		Pold4
1038									Irf9			Mtf2		Ndufa5		Gm21092
1039									Atp6v1f			Naa35
1040									Tcf4			A130010J15Rik
1041									Lpar6			Mcts2
1042									Rab11a			Tm2d3
1043									Ahnak			mt-Nd4
1044									Fmnl1			Dennd2a
1045									Psme1			Fam174b
1046									Bax			Mbd3
1047									2610001J05Rik			Bhlhb9
1048									Ccdc93			Wipi2
1049									Dera			Eif2b3
1050									Rasa4			Cyb5r4
1051									Aph1c			Igf2bp2
1052									P4ha1			Fxr1
1053									Uba7			Tmem51
1054									Rab31			Nsrp1
1055									Tlr13			Cdc5l
1056									Lmbrd1			Ak8
1057									Iscu			Dazap1
1058									Clptm1			Ik
1059									Ptrhd1			Prkar1b
1060									Gga1			1810041L15Rik
1061									Grina			Amer1
1062									Trappc2l			Fam216a
1063									Arid5a			Supt4a
1064									Mef2a			Rnf138
1065									Slc16a6			Cdc42
1066									Trappc3			Jmy
1067									Adprh			Stk11
1068									Txn2			Zfp513
1069									Tmem219			Kif1b
1070									Vps33a			Chd2
1071									Kdm7a			Sox11
1072									Coro7			Wdr47
1073									Ccdc53			Coq10b
1074									Arhgap18			Csnk2b
1075									Fam134b			Rtkn
1076									Chmp4b			Pdcd10
1077									Cpsf4			Atrx
1078									Pla2g4a			Uba1
1079									Coa5			Gm609
1080									Sri			Vamp8
1081									Sin3b			Trappc6b
1082									Wdfy3			Bptf
1083									Taldo1			Agtrap
1084									Dnajb14			Senp6
1085									Gab3			0610010F05Rik
1086									Ncln			Fbxl15
1087									1700026L06Rik			Snrnp48
1088									Cttnbp2nl			Cbfb
1089									Man1c1			Gpbp1l1
1090									Filip1l			Ash2l
1091									Dpysl2			Pak4
1092									Cdk9			Pmpcb
1093									Ywhah			Hnrnpl
1094									Fam173a			Ankra2
1095									I830077J02Rik			Fam192a
1096									Rap2c			Vcp
1097									Pias1			Ndufb11
1098									Elk3			Tmem11
1099									Lfng			Pam16
1100									Scp2			Sbno1
1101									Mob3c			Atp6v1b2
1102									Dhrs1			Dnajc1
1103									Max			Polr2i
1104									Plekha2			Mxd4
1105									Tmcc3			Sra1
1106									Cuta			Klf13
1107									Tbc1d4			Strn3
1108									Paqr7			Samd10
1109									Kcnk13			Dll4
1110									Cox4i1			Tulp4
1111									Ppp1r21			Abtb1
1112									Mtpn			Ccdc50
1113									Arl8a			Ralbp1
1114									Abcd1			Sugt1
1115									Prr13			Ccnjl
1116									Mitf			Pias2
1117									Rit1			Nipbl
1118									Ticam2			Pin1
1119									Mpp6			Psma4
1120									Osbpl8			Rnf146
1121									Tpr			Fam43a
1122									Tlr1			Ndufaf3
1123									Ddrgk1			2310030G06Rik
1124												Bcar1
1125												Nipal1
1126												Armc1
1127												Brd7
1128												Prkcsh
1129												Zkscan1
1130												Ap2m1
1131												Sftpc
1132												Fat1
1133												Ddx42
1134												Lipc
1135												Map1a
1136												Cd2
1137												Hspb11
1138												Ndufs1
1139												Tbcb
1140												Harbi1
1141												Ubxn2a
1142												Dda1
1143												Tmem30a
1144												Tmub2
1145												Cops3
1146												Glul
1147												Gatsl2
1148												Ccnt1
1149												Calcoco1
1150												Ezh2
1151												Csnk2a1
1152												Coprs
1153												Prdx5
1154												Tcp1
1155												Sccpdh
1156												Pcgf3
1157												Erh
1158												Limd2
1159												Ssbp1
1160												Habp4
1161												Mrps10
1162												Napa
1163												Rundc3a
1164												Hps4
1165												Rbmx2
1166												Proser1
1167												Mbnl2
1168												Tspan31
1169												Psme2
1170												Rad17
1171												Cdkn2aip
1172												Pigp
1173												Rabep1
1174												Usf2
1175												Tmem101
1176												Dcun1d5
1177												Trappc4
1178												Asb13
1179												Fopnl
1180												Mrps34
1181												Vil1
1182												Pnrc2
1183												Psma3
1184												Ntmt1
1185												Eif3a
1186												Zbtb18
1187												Tox4
1188												Efcc1
1189												Rnf215
1190												D030056L22Rik
1191												Thoc3
1192												Cops4
1193												Zfp830
1194												Rab6a
1195												Ddx46
1196												Eml5
1197												Tmem53
1198												Itfg1
1199												Srsf3
1200												Ccpg1os
1201												Eif2s3y
1202												Midn
1203												Khdrbs1
1204												Ctbp1
1205												Asxl2
1206												Cryzl1
1207												Chfr

## Sheet: Supplementary Table 4
Supplementary Table 4. Pancreatic epithelial and Mesothelial cells of the mouse embryonic pancreas (10x single-cell RNA-seq) clustered using CONOS (data integrated from E12.5, E13.5, E14.5 and E17.5 embryonic samples, and with cells of the Procr+ cell cluster retrieved from Wang et al. adult pancreatic islets). Cell cluster markers (adj. P-value<0.05) ranked by Average log2 fold change.
	Cluster
Marker #	Mesothelial	Mesothelial pr.	Tip	Tip pr.	Acinar	BP	BP pr.	Ductal	EP	Fev+	α	β	δ
1	S100a6	S100a6	Cpa2	Cpa2	Cela3b	Spp1	Spp1	Spp1	Neurog3	Chgb	Gcg	Iapp	Sst
2	Dcn	Prkcdbp	Cpa1	Serpina6	Rnase1	Cyr61	Top2a	Tmem45a	Gadd45a	Slc38a5	Pyy	Ins1	Pyy
3	Upk3b	Dcn	Serpina6	Cpa1	Cela2a	1700011H14Rik	2810417H13Rik	Clu	Btbd17	Chga	Slc38a5	Ins2	Iapp
4	Col3a1	Upk3b	Vtn	Pnliprp1	Cpb1	Gsta3	Cdk1	Tinagl1	Igfbpl1	Neurod1	Tmem27	Chga	Rbp4
5	Cav1	Lgals1	Gc	Nupr1	Ctrb1	Sox9	Ube2c	Fmo2	Cdkn1a	Hmgn3	Pcsk1n	Pcsk2	Pcsk2
6	Prkcdbp	Cav1	Ambp	Serpini2	Sycn	Fxyd2	Hmgb2	Aldoc	Cck	Pcsk1n	Pcsk2	Nnat	Scg2
7	Col1a2	Col3a1	Clps	Ptf1a	Spink1	Hes1	Cdca8	Lurap1l	Gadd45g	Cpe	Cpe	Chgb	Pcsk1n
8	Col1a1	Birc5	Nupr1	Tmem97	Pnliprp1	Cldn3	Birc5	Bicc1	Hes6	1700086L19Rik	Rbp4	Pcsk1n	Tmem27
9	Igfbp5	Igfbp2	Pnliprp1	Vtn	Cela1	Cldn6	Cenpf	Mt2	Nkx2-2	Cryba2	Iapp	Scg2	Ppy
10	Lgals1	2810417H13Rik	Gamt	2810417H13Rik	Clps	Atp1b1	Cks2	Sat1	Ttll6	Map1b	Gpx3	Ppp1r1a	Isl1
11	Rarres2	Col1a2	P2rx1	Gc	Pdia2	Rbp1	Prc1	Mt1	Tubb3	Pax6	Chga	Scg3	Gpx3
12	Emp3	Igfbp5	Hmga2	Gcat	Cel	Adamts1	Rrm2	Gas6	Ppp1r14a	Fam183b	1700086L19Rik	Scg5	Scg5
13	Rcn3	Gas1	Cela1	Lyar	Fkbp11	Wfdc2	Wfdc2	Dcdc2a	Rph3al	Aplp1	Scg5	Cpe	1700086L19Rik
14	Ccdc80	Emp3	Cldn6	Gamt	Erp27	Hmga2	Tk1	Pdzk1ip1	Pax4	Cck	Isl1	Npy	Fam159b
15	Sparc	Wt1	Cpn1	Ctrb1	Cpa1	Vnn1	Gmnn	Atp1b1	Mfng	Gch1	Chgb	Cryba2	Hhex
16	Hspb1	Col1a1	Plk2	Rrm2	Prss2	Acot1	Smc2	Ppp1r1b	Cbfa2t3	Hepacam2	Aplp1	Slc30a8	Chgb
17	Igfbp6	Cenpf	Wfdc2	Clps	Arhgdig	Hhex	Smc4	Gsta3	Foxa3	Pyy	Fam183b	Gng12	Fam183b
18	Osr1	Top2a	Ccnd2	Cpn1	Nupr1	Mia	Lig1	Gstt1	Gfra3	Prnp	Ghrl	Scgn	Chga
19	Anxa2	H2afx	Flrt2	Cela1	Try5	Lurap1l	Spc25	Slc15a2	Cpt2	Scgn	Zcchc18	Fam183b	Arg1
20	Nbl1	Sfrp1	Gstm1	Gstm1	Zg16	Habp2	Pbk	Hhex	Cotl1	Fev	Peg10	Pcsk1	Scg3
21	Cryab	Ldhb	Rhov	P2rx1	Reep5	Jun	Nusap1	Slc28a3	Insm1	Vwa5b2	Scg3	Mafb	Abcc8
22	Igf2	Rcn3	Spink1	Reep5	Cpa2	Krt18	Ccnb1	Cldn3	Smarcd2	Cldn4	Pax6	Pax6	Cpe
23	Gas1	Ube2c	Ttr	Ifitm3	Klk1	Pamr1	Sox9	Trf	Mpc1	Isl1	Etv1	Gpx3	Hmgn3
24	Serping1	Sparc	Smco4	Srm	Try10	Cited1	Tuba1c	Eno1	2010107G23Rik	Lrpprc	Pam	Tmem27	Aplp1
25	Ldhb	Pmp22	Hbb-y	Ggh	Tmed6	Sphk1	Mki67	Tm4sf4	Stard10	Tubb3	Hmgn3	Gch1	Resp18
26	Igfbp2	Anxa2	Aldh1b1	Hmgb2	Serpina6	Apoc1	Tyms	Selenbp1	Btg2	Syt13	Sct	Atp2a2	Pam
27	Pmp22	Osr1	Phgdh	Pla2g12a	Cckar	Ier2	Ccnd1	St3gal4	Sox4	Prrg2	Map1b	Sytl4	Pcp4
28	Wt1	Cks2	Tmem97	Asns	Aqp12	Nit2	Cdc20	Scara3	Tff3	Cacna2d1	Resp18	Slc38a5	Zbtb20
29	Ifitm1	Cryab	H19	Spink1	Mt1	Krt8	1700011H14Rik	Fmo1	Syt13	Ypel3	Gast	Sdf2l1	Pax6
30	Ppic	Cenpa	Mest	Birc5	Ctrc	Tax1bp3	H2afx	Capg	Gpx2	Pim2	Dbpht2	Tspan7	Ppp1r17
31	S100a10	Fbln2	Rnh1	Aldh1b1	Cela3a	Pdzk1ip1	Ccna2	Ehf	Selm	Tm4sf4	Mafb	Pyy	Dbpht2
32	Sfrp1	S100a10	Prdx6	Myc	Tmem97	Epcam	Hmga2	S100b	Dbn1	Scg3	Lrpprc	Rbp4	Gap43
33	Sulf1	Cald1	Reg1	Tmem238	Amy2a5	Mdfi	Plk1	Aplp2	Vwa5b2	Scg5	Tspan7	Syt13	Klhdc8b
34	Mfap2	Nusap1	Sox4	Spc24	Rbpjl	Errfi1	Hist1h1b	Adamts1	Tox3	Tspan7	Neurod1	Ero1lb	Map1b
35	Bcam	Nr2f2	Homer2	Cckar	Ang	Bicc1	Gsta3	Ccnd1	Trp53i11	Celf3	Gch1	Prnp	Fam46a
36	Cald1	Ccdc80	Nrp1	Tinag	Gstm1	Ccnd1	Tpx2	Lbp	Mtch1	Rph3al	Tmsb15b2	1700086L19Rik	Ap1s2
37	Fbln2	Nnat	Rbp4	Tyms	Edem1	Mgst1	Cdca3	Muc1	Mpzl1	Pcsk2	Scgn	Mlxipl	Ptprz1
38	Aebp1	Sulf1	Ctrb1	Fen1	Scd2	Smtnl2	Cited1	Zbtb20	Rcor2	Rbp4	Abcc8	Neurod1	Hadh
39	Igfbp4	Barx1	Serf1	Plk2	Try4	Sox4	Atp1b1	Sox9	Gdpd1	Mid1ip1	Pim2	Papss2	Ly6h
40	Slc9a3r1	Cdca8	Myc	Pa2g4	Mt2	Hebp1	Aurkb	Hpgd	Ypel3	Ffar2	Wnk3	G6pc2	Mid1ip1
41	Nkain4	Hmgb2	Ifitm3	Xbp1	Ass1	Crb3	Incenp	Apoc1	Cdk2ap1	Zcchc18	Ppy	Rab3a	Ffar4
42	Crip1	Tpm1	Wfdc15b	Ddx39	Dhx34	Grb7	Cenpe	Atp1a1	Ffar2	Runx1t1	Ttr	Prss53	Gch1
43	Gsn	Slc9a3r1	Ptf1a	C1qbp	Gcat	Nr4a1	Tubb4b	Kifc3	Lpar6	Emb	Scg2	Pak3	Gnao1
44	Dmkn	Spc25	Serpini2	Ambp	Pnliprp2	Arl4c	Aurka	Cldn10	Grasp	Pam	Cryba2	Aplp1	Prnp
45	Akap12	Igf2	Apoc1	Dctpp1	C1qa	Cym	Fbxo5	Col9a3	Mfap4	Neurog3	Rnf130	Creld2	Stxbp5l
46	Ptrf	Ppic	Cym	Cel	Gamt	Ugt2b34	Cldn3	Crip2	Chd7	Igfbpl1	Smarca1	1110008P14Rik	Sez6l2
47	Aldh1a2	Aldh1a2	Dap	Nhp2	Insig1	Col9a1	Dhfr	Sult1c2	Aplp1	Ctsf	Prnp	Map1b	1500009L16Rik
48	6330403K07Rik	Nbl1	Prss23	Uchl5	Gm42418	Dusp9	Id2	Ces1d	Cyb5r3	Dbpht2	Gatsl2	Fam151a	Scgn
49	Bst2	Tmem108	Matn4	Hspd1	Gatm	Cldn7	Adamts1	Ctsh	Cldn6	Rap1b	Zdbf2	Hepacam2	Meis2
50	Ahnak	Bcam	Gcat	Cks2	Serpini2	Dcdc2a	Kif23	Krt19	BC023829	Cystm1	Cck	Abcc8	Hist3h2ba
51	Fxyd1	Plagl1	Phlda1	Homer2	Serp1	Myl12b	Tacc3	Dbi	Casp6	Nkx2-2	Hepacam2	Slc2a2	Rab3b
52	Tpm1	Smc4	Fermt1	Ccnb1	P4hb	Grb10	Cyr61	Shisa5	Krt7	Gars	Ap1s2	Ap1s2	Fxyd3
53	Upk1b	Kcnj8	Afp	Ifrd2	Reg1	Prr13	Ccdc34	1700011H14Rik	Spint1	Gm43861	Sphkap	Gm10320	Cplx2
54	P3h4	Smc2	Cmtm8	Uchl3	Ptf1a	Ambp	Dek	Pamr1	Tmem171	Bex2	Syt13	Acly	Pnmal2
55	Nnat	Cdc20	Pla2g12a	Ddc	Edem2	Kcnk1	Spc24	Laptm4b	Camk2n1	Pou3f4	Gnas	Tmsb15b2	Pcsk1
56	Barx1	Hspb1	Epcam	Cdca8	Psmb10	Nkx6-1	Tuba1b	4931406C07Rik	Bambi	Mafb	Gnao1	Sec11c	Lgals3bp
57	Arhgap29	Prc1	Xbp1	Pttg1	Sdf2l1	Id2	Asf1b	Erich5	Krtap17-1	Gdi1	Dnajc12	Emb	Capsl
58	Wls	Nfib	Tinag	Rfc4	Hbb-bt	Mxra7	Ezh2	Hes1	Amotl2	Pak3	Igfbpl1	Gadd45g	Lbp
59	Klk8	Gsn	Gpc3	Phgdh	Sepp1	Slc2a2	Rfc5	Cbs	Gm8773	Krt7	Arx	Ndufa1	Ndufa1
60	Tpm2	Lockd	Zfos1	Gar1	Gm15915	Nudt19	Kif22	Id2	Neurod2	Tox3	Mid1ip1	Ece1	Auts2
61	Tmem108	Tpx2	Gsto1	Ldha	Ins2	Wfdc10	Shcbp1	Wfdc10	Steap1	BC023829	Slc7a2	Dnajb9	Cd24a
62	Tmem151a	Mest	Rpl10-ps3	Ppa1	Asns	Fjx1	Mad2l1	Krt18	Nkx6-1	Ptprn2	Pou3f4	Pdx1	Pak3
63	Kcnj8	Tuba1b	Cckar	Pbk	Prss1	Junb	Racgap1	Cyr61	Vasp	Gnao1	Efcab1	Hadh	Bambi
64	Plat	Mfap2	Dlk1	Nolc1	Aqp8	Eps8l2	Hist1h2ap	Sphk1	Tmem184a	Atp6v0b	Cnot6l	Manf	Emb
65	Gpx8	Cenpm	Pla1a	Tmed6	Ifitm3	Cldn9	Rbp1	Adamts9	Serinc2	Tuba1a	Bex2	Gnas	Npdc1
66	Alad	Ndn	Espn	Cenpa	Ins1	Bex1	Hhex	Krt23	Mdk	Zdbf2	Tmsb15l	Ociad2	Kcnmb2
67	Plagl1	Racgap1	Pcbd1	Gm2000	Cbs	Tinagl1	Cks1b	Gstt2	Tpst2	Gpx3	Pak3	Tubb3	PISD
68	Eln	Tubb2b	Pdx1	Phlda1	Nucb2	Hpgd	Hmmr	Mmd2	Swt1	Rogdi	Vwa5b2	Slc35b1	Sult1d1
69	Smim1	Rarres2	Ung	Nop10	Ggh	Cmtm8	Dnajc9	Trim47	Neurod1	Pax4	Pnmal2	Hmgn3	Frzb
70	Ndn	Ccnb2	Ddc	Gmnn	Rnase4	Tmem45a	Lsm2	Fam3c	Vps37a	Pcsk1	Emb	Sez6l2	Gnptg
71	Fstl1	Alad	Rnase4	Umps	Tmed3	Smco4	Rrm1	Gm42418	Snrk	Rgs17	Zbtb20	Zcchc18	Scn9a
72	Nr2f2	Klk8	Rcan2	Cks1b	Rrbp1	Wfdc15b	Cenph	Gsta4	Kirrel2	Glud1	Ocrl	Hyou1	Rnf138rt1
73	Tmsb4x	Ptn	Fjx1	Tex30	Hbb-bs	Mycn	Hpgd	Osgin1	Prodh2	Btbd17	Trim35	Tuba1a	Ctsf
74	Igf1	Mki67	Dusp9	Cdk1	Sel1l	Rhob	Dut	Proser2	Fgd2	Gfra3	Ypel3	Nucb2	Itpr1
75	Aprt	Akap12	Acot1	Set	Rap1gap	Zfp637	Mis18bp1	Gpm6b	Pkib	Gnas	Mageh1	Slc2a5	Mageh1
76	Krt19	Tmsb4x	Reep5	Cdc20	Sec11c	Cd24a	Pmf1	Slc2a2	Cyth2	Mapre3	Ffar4	Ffar1	Ins2
77	Gpm6a	Ccnb1	Dctpp1	Smco4	Bhlha15	Pnrc1	Kif20b	Mgst1	Lingo1	Gabarapl2	Irx2	Maob	Efcab1
78	Mest	Zcchc3	Ffar2	Dkc1	Hba-a1	Fam159a	Lsm3	Prss8	Eva1b	Ubqln2	1500011B03Rik	Tm4sf4	Necab2
79	Pdpn	Cdk1	Ptn	Cycs	Aldh1a1	Klf3	2700094K13Rik	Acot1	Ly6e	Qdpr	Rab3a	Nkx6-1	Tusc3
80	Serpinh1	Cdca3	Cel	Cyb5b	Spcs3	Mdk	Arl6ip1	Anxa5	Pclo	Plcxd3	Ubqln2	Tmem215	Rundc3a
81	Rhoc	Gpx8	Tnfaip8	Dap	mt-Atp8	Enpp2	Bicc1	Nfib	Lrpap1	Ankrd44	Cplx2	Pclo	Pla2g2f
82	Rarres1	Ckap2l	Comtd1	Hprt	Ssr1	Akr1cl	Hist1h1e	Slc44a3	Map1b	Ffar4	Dusp10	Fkbp1b	Ocrl
83	Lrrn4	Plat	Bmp7	Ranbp1	Ggt1	Lpar6	Gins2	Sdc4	Cer1	Cnot6l	Hap1	Resp18	Ece1
84	Ptgis	Ahnak	Nme4	Lsm2	Tram1	Plin3	Rad51	Pah	Sct	Glul	Irx1	Pim2	Pld3
85	Vim	Podxl	Mia	Ttr	P2rx1	Atf3	Nasp	Tesc	Pard3	Gstz1	Rogdi	Hist3h2ba	Nenf
86	Nfib	Nr2f1	Parm1	Ube2c	Itga6	Fmo2	Cldn6	Cxcl12	Cdc14b	Insm1	Lrpap1	Entpd3	Gng12
87	Ogn	Stmn1	Mxd4	Dut	Fam46c	Plin2	Hells	Cd9	Klc3	Cplx2	Rundc3a	Camk2n1	Fkbp2
88	Calml4	Wls	Gm26917	Lsm3	Msrb1	Capg	Dusp9	Epcam	St3gal6	St18	Ctsf	Isl1	Pea15a
89	Cdkn1c	Fbn2	Set	Nop56	Igf1	Acadm	Fmo2	Rgs2	Plk3	Pnmal1	Ctsz	Selm	Serpine2
90	Timp2	Upk1b	Mdk	Hells	Lbh	Srek1ip1	Mcm7	Ttyh1	Prox1	Rab3a	Slc16a10	Dbpht2	Lrpap1
91	Tm4sf5	Ccna2	Chst2	Mad2l1	Gm10320	8430408G22Rik	Bub3	Gm37350	Ttc28	Stxbp5l	Tuba1a	Mageh1	Sdf4
92	Col14a1	Pttg1		Exosc8	Fabp5	Litaf	Nucks1	Cfi	Tmc4	Gck	Sez6l2	Prps1	1500011B03Rik
93	Efemp1	Tk1		Rbpjl	Chst2	Sparc	Ccnb2	Cldn7	Apoc1	Cnih2	Dst	Fam174b	Tuba1a
94	Tm4sf1	Dek		Matn4	Kctd14	Cdkn1c	Clspn	Palmd	Gse1	Klc3	Slc30a8	Mien1	Runx1t1
95	Bmp4	Crabp1		Nsmce4a	Rab3d	Ctsh	Rfc4	Rab25	Slc39a2	Cirbp	Mapre3	1500011B03Rik	Tubb2a
96	Lgals3	Knstrn		Shmt1	Krtcap2		Rangap1	Wfdc15b	Pla2g2d	Gng12	Camk2b	Gjd2	Slc16a10
97	Msln	Cdkn1c		Sepp1	Gnmt		Tipin	Tst	1110012L19Rik	Cd164l2	Ubl3	Insm1	Ins1
98	Lgals7	Pdpn		Tomm40	Ppib		Cenpa	Tle6	Upp1	Necab2	Rph3al	Efcab1	Gnas
99	Mgp	Bmp4		Mrto4	Rpn1		Tubb5	Chka	Ctsf	Tmem27	Gabarapl2	Gnao1	Cxxc4
100	Ccnd3	Tpm2		Lrrc59	Ttc23		Prim1	Anxa4	Tmsb4x	Btg2	Cldn11	Tmed3	Etv1
101	Col6a2	Tacc3		Dhx34	Qsox1		Ckap2l	Habp2	Gadd45gip1	Cdkn1a	Glul	Hagh	Camk2b
102	Podxl	P3h4		Nop58	Copz2		Esco2	Ins2	Gdap1l1	Vps37a	PISD	Dnajb11	Pcsk2os1
103	Crip2	Rbms1		Dtymk	Cldn10		Dtymk	Tkt	Stx16	Gadd45a	Ctxn2	Usp9x	Selm
104	Fkbp10	Tubb6		Prdx6	Fkbp2		Nkx6-1	Pfkl	Rnf114	Snx15	Hist3h2ba	Cplx2	Cd47
105	Cmtm3	Ifitm1		Ccnd2	Tsga10ip		Mcm5	Hpn	Cxxc5	Ptbp3	Mapk15	Npdc1	Ramp1
106	Egfl6	Lpl		Bex2	5330417C22Rik		Hes1	Cdh1	Traf4	Spint1	Tusc3	Pam	Mlxipl
107	Cd82	Arhgap29		Rsl1d1	Bcat2		Tmpo	Hbb-bs	Pde1c	1110008P14Rik	Ptprn2	Rap1b	Celf3
108	Tgm2	Cenpe		Rpa3	Tff2		Ssrp1	Cadm1	Rbfox2	Npdc1	Gnptg	Enho	Gm609
109	Fbn2	Lrrn4		Serp1	Hba-a2		Cldn7	Gjb1	Rap1gap2	Hap1	Gdi1	Fkbp2	Ghrl
110	Klk13	Fgf9		Mrpl12	Hes1		Mcm3	Rassf10	Mob4	Mlxipl	Celf3	Slc7a2	Cdh2
111	Maged2	Fstl1		Lsm5	Tspan1		Hist1h2ae	Kcnk1	Scpep1	Sct	Lgals3bp	Exoc7	Rab3a
112	Sepw1	Aebp1		Apex1	Rps27l		Sae1	Sbspon	Prrg2	Trim35	Atp6v0b	Cd164	H2-D1
113	Map1lc3a	Serping1		Rrs1	Serpinf2		Uhrf1	Vnn1	Rbfox3	Tekt2	Ank	Gck	Hap1
114	Rspo1	Npnt		Mrpl42	Xbp1		Cdca2	Actn4	Ubald2	Cyth2	Itm2c	Sphkap	Nefm
115	Laptm4a	Zfp36l1		Wdr43	Serpinb1a		Nudt19	Krt8	Foxa2	1810008I18Rik	1110008P14Rik	Surf4	Ypel3
116	Sfrp2	Igfbp6		Pigf	Sec61a1		Rfc2	Adgrg6	Numbl	Gatsl2	Gprasp2	Il1r1	Rgs17
117	Nrk	Rhoc		Gemin6	H13		H2afz	Vim	Gm42637	Dctn3	Tm4sf4	Gfra3	Fam92b
118	Anxa5	Ptrf		Tipin	2210010C04Rik		Rpa2	Sorbs2	Btg1	Igsf8	Auts2	Chic1	Syt13
119	Ifi27	Myh10		Wdr77	Hdlbp		Ube2s	Slc2a1	Tecpr1	Gdap1l1	Runx1t1	Smim14	Cd200
120	Npnt	Tuba1a		Snrpa1	Car9		Casc5	Hba-a1	Fam110a	Arx	Trappc2l	Derl2	Vwa5b2
121	Zfp36l1	Igfbp4		Rangrf	Ssr3		Kcnk1	Wfdc2	Agpat4	Npepl1	Dohh	P2ry1	Rogdi
122	Fgf9	Nrk		Anp32b	Dnajc3		Hat1	Cxadr	Kdm7a	Prps1	Slc25a5	Rundc3a	Ica1
123	Ntm	Sox11		Sssca1	Clu		Ambp	Spink4	Tecr	Dnajc12	Cd164l2	Ufm1	Gdi1
124	Anxa3	Klk13		Hacd1	Dap		Knstrn	Ncald	Acly	Cltb	Rap1b	Ffar4	Golim4
125	Pitx2	Cks1b		Bex4	Ssr4		Cadm1	Snhg18	Mapk3	Hagh	Gars	Gfpt1	Hist1h2bc
126	Fbln1	Hist1h1b		H2afz	Magt1		Lurap1l	8430408G22Rik	Gstz1	Atp6v0d1	Glud1	Cltb	Eif4e3
127	Pdzrn4	Serpinh1		Anp32e	Gstm7		Nrarp	Acadl	Sh3bgrl3	1110012L19Rik	Hagh	Rab27a	Ctsl
128	B3gnt9	Smim1		Mt1	Vimp		Vrk1	Rassf9	Tpm4	Tpst2	Rai2	Vwa5b2	Hist1h1c
129	Ptn	2700094K13Rik		Rfc5	Tspan13		Mcm6	Rnf128	St6galnac2	Pdx1	Ndn	Rogdi	Zdbf2
130	Efna1	Hmmr		Naa50	Ero1lb		Ska1	Anxa6	1810008I18Rik	Nkx6-1	Nap1l5	Acvr1c	Ppp1r14c
131	Col6a1	Incenp		Lmnb1	Larp1		Pcna	Clmn	Ttc5	Atp6v1e1	Meis2	Pnmal2	Tmed3
132	Gas6	Ezr		Tomm5	Rexo2		Bex1	Ins1	Tmem59	Selm	Syt7	Kcnmb2	Acly
133	Tmem88	Id3		Bzw2	Tdh		Cenpw	Rab20	Cplx2	Pclo	Slc7a14	Saraf	Saraf
134	Ezr	6330403K07Rik		Gnl3	Slc39a5		Mis18a	Ddt	Mia	Klhl7	Prps1	Derl3	Gria2
135	Mxra8	Ddah2		Exosc7	Clptm1l		Vnn1	Snhg6	Serpina1b	Rab7	Rgs4	Selk	Usp51
136	Fkbp7	Tmem151a		Hmga2	Sec61b		Tinagl1	Cldn8	Zfand6	Zbtb20	Npdc1	Tmem206	Ndn
137	Cpxm1	Egfl6		Fam136a	Upk3a		Ncapg	Nav2	Tead2	Ids	Cystm1	Spock2	App
138	Smoc2	Meis1		Mest	Gm10073		Col9a1	Zfos1	Mmd2	Gadd45g	Capsl	Gip	Hbb-bs
139	Cd81	Aprt		Rpl10-ps3	Ift20		Epcam	Galm	Ppp1r14b	Atp6v1b2	Lrp11	Rph3al	Fos
140	Cldn15	H2afy2		Lsm4	Trabd		Kif20a	Hbb-bt	Rasl11b	Hes6	Chic1	Ssr4	Tspan5
141	Nr2f1	Rspo3		Npm3	Sec61g		Habp2	Lrrfip1	Ndrg1	Tmem163	Asb4	Tubb2a	Isg20
142	Zcchc3	Timp2		Srsf2	Serpini1		Tagln2	Cat	Casz1	Ap1s2	Ppp1r1a	Atp6v0d1	Ramp2
143	Ddah2	Rrm2		Wfdc15b	Mlec		Fam64a	Tstd1	Tmed4	Serinc1	Sdf4	Snap25	Bex2
144	Tubb2b	Mxd3		Pold2	Snd1		Sgol1	App	Tle6	Arpc5	Usp9x	Atp6v1e1	Pde10a
145	Nid2	Lsm2		Ran	Ghr		Rad51ap1	Ptgds	Glrx	Efcab1	Edn3	Gpd2	Gm1673
146	Tshz2	Akr1b3		Ruvbl2	Gm10334		Cdo1	Tmem176b	App	2010107G23Rik	Ndufa1	Uso1	Chic1
147	Epha3	Ccnd3		Ybx1	Smim14		Syce2	Dcbld1	Enc1	Bax	Rgs17	Vps8	Enho
148	Dab2	Hoxa5		Srsf7	Rbp2		Fen1	Stbd1	Zdbf2	Slc25a5	Camk2n1	Tssc4	Hexa
149	Cnn2	Klk14		Ccnb2	Egr1		Hmgb3	Anxa2	Tuba4a	Rem2	Tuba4a	4833439L19Rik	Cd164l2
150	Cers4	C1d		Eef1e1	Prss3		Kif2c	Car2	Igsf8	Lhx1os	Sesn2	Mapre3	Gm43861
151	Nenf	Kif22		Ung	Gm10076		Sphk1	Aldoa	Psmd4	Mfng	Ptbp3	Anxa5	Cltb
152	Cdh11	Lmnb1		Lsm7	Herpud1		Lmnb1	S100a11	Fyttd1	Foxa2	Cltb	1500009L16Rik	5330417C22Rik
153	Hoxa5	Tubb4b		Top2a	Lin37		Exosc8	Ddit4l	Lrrc42	Mageh1	Upp1	Atp2a3	Efcab10
154	Gucy1a3	Nsg1		Gm10269	Tob1		Wfdc15b	Camk1	Col9a2	Lhx1	Ncam1	Glul	Ush1c
155	Rpp25	Nasp		Brix1	Itln1		Deb1	Aldh2	Marcks	Trappc2l	Rab37	Phactr1	St18
156	Fmod	Tspan4		Sephs2	Sdsl		Ppil1	Acadm	Marcksl1	Cldn11	Gm43861	Meis2	Sez6l
157	Col5a2	Aurkb		Mt2	Myo15b		Cenpk	Fgfr2	Smarce1	Anxa4	2210013O21Rik	Hspa5	Atp6v0b
158	Rbms1	Hdgfrp3		Mcm7	Ndrg1		Mxra7	Me1	Olfm1	Prdx5	Selm	Pcp4	Fxyd2
159	Tspan4	Pitx2		Psip1	Rpl38		Chaf1b	Rbp1	Fuca1	Pnmal2	Map3k15	Trappc2l	Arl4a
160	Loxl1	Ptprd		Eif2s1	Hyou1		Melk	Rhob	Aldh1b1	0610011F06Rik	Insm1	Lrp11	Camk2n1
161	Mmp11	Nucks1		Ncl	Fxyd3		Atad2	Frrs1	Spink4	Tmc4	Gm1673	Rab3b	Syt7
162	Copz2	Vim		Serpini1	Ybx3		Cdca5	Gm10260	Spsb4	Immp1l	Gfra3	Isg20	Tshz1
163	Cd34	Oxct1		Cenpw	Pycr1		Nsmce4a	Mpst	Kdm1a	Baiap3	Atp6v1b2	Pdia4	Kctd8
164	Akr1b3	Cnn2		1110008F13Rik	Ufm1		Apoc1	Cd24a	Sult2b1	Rasd1	Ush1c	Pcsk2os1	Spint1
165	Apoe	Arl6ip1		Rnh1	Atp5k		Slbp	Smoc1	Cacna2d1	Rundc3a	Gdap1l1	Frzb	Ptprn
166	P3h1	Nid2		Ppid	Cabp2		Smtnl2	Pkhd1	Dnajb6	Ubald2	Ncoa7	Lpl	Mapre3
167	Clec11a	Spc24		Ppih	Wdtc1		Dbf4	Sptssa	Hbp1	Gnptg	Ptprn	Gatsl2	Scn3a
168	Arhgef25	Fxyd1		Aars	Manf		Pttg1	Nudt19	Rasgrp3	Ttll7	Klc3	Ptprn	Pcdh15
169	Anxa1	Gpm6a		Srp19	Extl3		Hn1	H2-K1	Cbfa2t2	Abcc8	Pcsk2os1	Cib2	Ssr4
170	Tmem119	Kif20a		Cacybp	Cpn1		Smc1a	Col18a1	Tsg101	Camk2n1	Zcrb1	Ubqln2	Gprasp2
171	Pcolce	Kif23		Dnajc2	Rps12-ps3		Kif11	Apoe	Hn1	Srp14	Pcbd1	Bace2	Vamp2
172	Serpinb1a	Ube2s		Fam49b	Tinag		Ndc80	Smtnl2	Txnip	Tpd52	Acly	Rasgrf1	Rai2
173	Colec12	Kif2c		Fkbp11	Amy2a2		Cmc2	Slc6a6	Cnot6l	PISD	Cacna2d1	Arhgap36	Hbb-bt
174	Meis1	Smoc2		Fbxo5	Hid1		Stmn1	Cd14	Ppp3ca	Tmx1	Klhdc8b	Ttr	Rock1
175	Cd248	Tm4sf5		Smc2	Slc26a9		Dcdc2a	Hrsp12	Cnot7	Yipf4	Nisch	Slc37a4	Prps1
176	Celf2	Cfl2		Bckdhb	Rpl35		Tkt	Pebp1	Lmna	Map9	Uchl1	Immp1l	Snap25
177	Plpp1	Ntm		Wdr18	Aup1		Sgol2a	Eepd1	Mtfp1	Vamp2	Cxxc4	Akr1c12	Rph3al
178	Ehd2	Wwtr1		Eif1ax	Dbi		Rnaseh2c	Lifr	Gtf2a2	Dst	Itpr1	Gars	Hba-a1
179	Ptprd	Plk1		Eif4ebp1	Sod1		Dnmt1	Ckb	Adrm1	Elof1	Necab2	Ank	Ahi1
180	C2	Rnf26		Fbl	Srp19		Fxyd2	Afm	Gdi1	Tox	Peg3	Rpn2	Smim22
181	Htra1	Tm4sf1		H2afx	Bet1		2700029M09Rik	Sh2d4a	Elovl1	Dbn1	Gria2	Trpm5	Junb
182	Tapbp	Nrgn		Rexo2	Gfpt1		Hnrnpd	Emp2	Gspt1	Meis2	Krt7	Zc3h3	Cbarp
183	Fcgrt	Map1lc3a		Akr1c13	Uqcrq		Ranbp1	Igbp1	Mcfd2	Casz1	Slc14a2	Pdia3	Atraid
184	Dlk1	Fam64a		Pno1	Snhg18		Krt8	Adk	Csnk1e	Cd164	Cotl1	Rasd1	Spock3
185	B2m	Myl9		Pcna	Eif3j1		Chaf1a	Adamts16	Mrpl1	Tcp11	Atp6v0d1	Hbb-bs	Ucp2
186	Fhl1	Cenpw		Dram2	Anpep		Ran	Tmem178	Hpca	Chd7	Kif21a	Adra2a	Mien1
187	Ptgds	Cmc2		Stmn1	Hist1h1c		Oard1	Car9	Rgs17	Tusc3	Nefm	Igsf1	Gabarapl2
188	Krt15	Isl1		Hspe1	Ctrl		Srsf3	Sparc	Cd24a	Usp18	Hexa	Uggt1	Klhl32
189	P4ha1	Fxyd6		Cdca3	Amy1		Acadl	Stt3b	Alas1	Rnf130	Tff3	Fndc3a	Sil1
190	Nrep	Fxyd7		Epcam	Fdps		Cenpm	S100a1	Pcbp4	1500011B03Rik	Gprasp1	Zbtb20	Erp29
191	Slpi	Alcam		Ptn	Ell2		Nrm	S100a10	Cd63	Agtrap	Gstz1	Tmsb15l	Asph
192	Slc16a3	Aurka		Ssbp1	Smim6		Wfdc10	Smim22	Celf3	Prkar1a	Dock11	Lgals3bp	Smpd3
193	S100a16	Shisa4		Pcbd1	Gmppb		Rfc3	Tgm2	Qdpr	Cacna1a	Nkx2-2	Npepl1	Tmem107
194	Svbp	Lig1		Slc25a5	Uba5		Mapk13	Nucb2	Ambp	Mob4	Qdpr	Gdi1	Gck
195	Myrf	Igf1		Dnajc9	Rps12		Col9a3	Igf1r	Atxn10	Cyb5r3	Rock1	Gabarapl2	Ncam1
196	Pdlim4	Flrt3		Fkbp3	Mgll		Slc2a2	Litaf	Mycbp2	BC031181	Pld3	Cd164l2	Insm1
197	Zfhx4	Hoxb7		Zfp706	Sostdc1		Dnajc2	Ldha	Fblim1	Fndc3a	Atraid	Hmgcr	Itm2b
198	Tmem98	Ckap4		Eif4e	Krt18		Psip1	Mapk13	Prom1	Pcyt1b	Tox3	Pycr2	Tshz2
199	Fah	Tubb5		Pbdc1	Chchd7		Mia	Errfi1	Ttll7	Pla2g2f	Vamp2	Sec61b	Kctd12
200	Creb3l2	Hand2		Ccna2	Lcmt1		Psat1	Gstt3	Miat	Chmp5	Immp1l	Slc7a14	Stk32a
201	Gm13305	Casc5		Hmgn5	Mcfd2		Snrpd1	Nfe2l2	Col9a3	Rock1	2610524H06Rik	Celf3	Casz1
202	Cpz	Fbln1		Nudcd2	Nes		Tubg1	Hebp1	Cib1	Tmem184a	Foxa2	Ubl3	Anxa5
203	Efemp2	Nde1		Siva1	Cuzd1		Acer2	Ier3	Tspan3	Polr2k	Atp6v1e1	Aacs	Card19
204	Sdpr	Mis18bp1		Gart	Rplp1		Smco4	Pacsin3	Carhsp1	Ece1	Gnai2	Gnptg	Gm10320
205	Pdgfc	Sepw1		Gsr	Rps21		Fam89a	Slc35f5	Kdm5b	Mien1	Cartpt	Rpn1	Igsf5
206	Ltbp4	H2afv		Banf1	Dmbt1		Hprt	Sult1a1	Krt8	Mad2l2	Hist1h2bc	Atp6v1b2	Cst3
207	Tuba1a	Hoxc4		Edem2	Dbt		Orc6	Ambp	Atp6v0b	Rfx6	Apbb1	Ush1c	Tekt2
208	Csrp2	Lsm3		Eif5a	Surf4		Nxt1	Cystm1	Phlda1	Cxxc4	Emc10	Syt7	Pvrl3
209	Hacd4	Nuf2		Dek	Cpox		Cbx5	Plpp2	Fscn1	Stx7	Chmp5	Hspa1a	Itfg1
210	Ppp2r2b	Dab2		Psmd7	Nans		Vps36	Cpne8	C2cd4b	Fgd2	Klhl7	Lysmd2	Nucb2
211	Amer1	Gucy1a3		Cyc1	Serinc3		Ube2t	Chchd10	Ahsa2	Akr1c13	Dpysl2	Ptprn2	Ppp1r1a
212	Hoxb7	Fkbp10		Hspa9	Larp1b		Usp1	Mboat1	Rsad2	Zcrb1	Fgd2	Atp6v0b	Epcam
213	Fis1	Crip1		Mphosph10			Acat2	Mfge8	Epb42	Selk	Cnih2	Bex2	Elavl4
214	Mmp14	Dmkn		Dusp9			Fjx1	S100a16	Serpina1c	Fam216a	Ankrd44	Tusc3	Spint2
215	Hcfc1r1	Hjurp		Tk1			Nmral1	Tmc4	Arf5	Atp5l	Cisd1	Wipi1	Tuba4a
216	Krt7	Bnc1		Tuba1b			Bub1b	Gm14226	Bcl2	Apbb1	Sin3b	Lrpprc	Phyhipl
217	Skap2	Tpm4		Rpf2			Crb3	Ildr1	Top1	Tmem59	Ctsl	Cisd1	Anxa6
218	Arl4a	Cmtm3		Cenpm			Plpp2	Cryab	Rab15	Cisd1	Snx15	Disp2	Cldn11
219	Gpc3	Rpp25		Aimp2			Smchd1	Rasl11a	Ckb	Uchl1	Baiap3	Ankrd44	Trim35
220	Olfml3	Nkain4		Rpa2			Bub1	Ech1	Gabarapl2	Dync1i2	Gck	Phyh	0610040J01Rik
221	Nrgn	Ppp2r2b		Bok			Ckap2	Il17re	Cystm1	Ubl3	Uqcc2	Pdia6	Cirbp
222	Rcn1	Cd81		Rap1a			Ugt2b34	Papss1	Yipf4	Ankrd54	Disp2	Uqcc2	Fam216a
223	Tubb2a	Rspo1		Reg1			Grb7	Pgm2	Rcn2	Napa	Snap25	Ctsf	Tmed10
224	Sbsn	Tgm2		Bmp7			Lockd	Ninj1	Npepl1	Ppp3ca	Rap1gap2	Vamp2	Ssr2
225	Oxct1	Tmem98		Gsto1			Fam111a	Elf5	Cd164l2	Klhdc8b	Ica1	Atp8b1	AW551984
226	Cd200	Cntfr		Nme1			Anp32e	Clic6	Ptprf	Rap1gap2	Celf4	Camk2b	Fndc3a
227	Emp2	Hoxb2		Rps27l			Snrnp40	Car8	Tprgl	Lrpap1	Prkar1a	Calr	Ddost
228	Myl9	Creb3l2		Prss23			Aldh1b1	Tap2	Dnaja1	Zwint	Zwint	Hopx	Tubb3
229	Cntfr	Mad2l1		Glrx5			Tst	Abcc3	Myef2	Psmd4	BC048546	Nipal1	Gabrb3
230	Mfap4	Hoxb4		Slbp			H2afv	Arrdc1	Ddx6	Ttc5	Tmx1	Gdap1l1	Hagh
231	Rspo3	Dnajc9		Ruvbl1			Hirip3	Tagln2	Pla2g2f	Fam204a	Isg20	Dnajc3	Fgf12
232	Maf	Lhx9		Dpy30			Ncaph	Hnf1b	Akirin1	Ttll6	Mbnl2	Mia3	Cfap126
233	C1d	Kif20b		Nhp2l1			Ctcf	Kcnn4	Fam20c	Atp6v1d	Fxyd6	Ucn3	Plcb4
234	Oprk1	Apoe		Lig1			Rad50	Oxa1l	Ddit4	Cib1	Lysmd2	Akr1c13	Pitpnc1
235	Sbspon	Oat		Atic			Rdx	Taf1d	Rgs16	Peg10	0610011F06Rik	Hbb-bt	Nkiras2
236	Plxdc2	Pmf1		Hmgb3			Alyref	Map3k1	Tspan15	Cnot7	Fam216a	Cxxc4	Gprasp1
237	Cdon	Hbb-y		Dnajc3			St3gal4	Tmem37	Nono	Amigo2	Spint2	Gmppb	Nagk
238	Sptbn1	Sgol2a		Rrp15			Bex4	Gpi1	Syt7	Myt1	Bend7	Syndig1l	Trappc6b
239	Calu	Aspm		Fam195a			Siva1	Ctsl	Map2k1	Cpt2	Cmip	Ankrd54	C1qtnf4
240	Arl6ip5	Calu		Cdca7			Haus8	Tshz2	Psmc2	Ghrl	Il1r1	Plcxd3	H2-K1
241	Ctsl	Rrm1		Arpp19			Enah	F11r	Ccndbp1	Ppp2r5b	Prdx5	Cgrrf1	Pdx1
242	H19	Mmp11		Serpinb1a			Emc6	Dab1	Spp1	Col9a2	Akap17b	Ppm1b	Spock1
243	Tfpi	H2afz		Smn1			Eno1	Slc39a10	Spint2	Mapk15	Tmsb15b1	Fam92b	Trappc2l
244	Des	Tmem88		Ssrp1			Paics	Itm2b	Eif5b	Etv1	Eva1b	Vimp	Akr1c13
245	Ube2e2	Colec12		Tnfaip8			Ncald	Adora1	Mospd1	Acly	Usp29	Atp6v0e2	Smim14
246	Gsdmd	Slc16a3		Idh3a			Slc38a4	0610040J01Rik	Ivd	Gtf2e2	Vps37a	Galnt18	Pdlim4
247	Crabp1	Siva1		Mcm5			Kifc1	Csrp2	Bcl7a	Irf2bpl	Pja2	Golgb1	Hepacam2
248	Ktn1	Pdgfc		Parl			Ddx39	Bsg	Tff2	Phip	Ttll7	Enpp2	Baz2b
249	Ildr2	Sfrp2		Id1			Cep57	Cdo1	Limd2	Mllt11	Fam213a	C1qa	Atp2a2
250	Hoxb4	Pdzrn4		Isyna1			Phgdh	Amd1	Rasd1	Eva1b	Maged1	Rnf130	Cnot6l
251	Cxcl13	Pole3		Magoh			Nde1	Pld1	Ldb1	Saraf	Med28	Ostc	Rap1b
252	Kdelr3	Olfml3		Snrpf			Ppm1g	9130008F23Rik	Slc29a1	Atp6v1g1	Cox17	Cope	Jade1
253	Sfxn3	Cacnb3		Rpl27-ps3			Gjb1	Arpc1b	Dst	Pam16	Spint1	Zfp516	Pcbd1
254	Thra	Col14a1		Nop16			Rbms3	Tpi1	Ginm1	Nisch	St18	Gng4	Rpn2
255	Myh10	Usp1		Tuba4a				Mia	Adgrg1	Fam213b	Dctn3	Ripply3	Erlec1
256	Nkd1	Glipr2		Magohb				Gm10709	Btf3l4	Hdac6	Srp14	Cox17	Tmc4
257	Rab34	Basp1		Mrpl15				Dync2li1	4833439L19Rik	Dnaja1	Map2	Anxa4	Golgb1
258	Aqp1	Rfc1		Lsm6				Col4a1	Pex19	Ndufaf3	Cit	H2-D1	Slc7a14
259	Abi3bp	Ska2		Gpatch4				Wwc1	Tm2d1	Akap17b	Tubb3	Prkacb	Snx15
260	Oat	Laptm4a		Ebna1bp2				Mbnl2	Aplp2	Gm8797	Nenf	Hba-a1	Alg2
261	Nfic	Svbp		Gnpnat1				Dsp	Megf11	Aacs	Cst3	Klhl32	Ccdc28b
262	Col5a1	Pbk		Dhfr				5330417C22Rik	Mad2l2	Capsl	Hdac6	Nkx2-2	Cfap61
263	Mmp23	Cdh11		Asf1a				Ezr	Mrfap1	Lrp11	Stxbp5l	Ddost	Slc6a6
264	Fkbp9	Fbxo5		Suclg2				Arid5b	Dhrs4	Calm2	Arl3	Nisch	Cryba2
265	Snhg18	Fkbp7		Shmt2				Tjp3	Mycl	Entpd3	Snrpn	Mllt11	Disp2
266	Hoxc4	Rdm1		Cdo1				Rab27b	Wrap73	Stat3	Gpr119	Dnajc24	Ctso
267	Glipr2	Efemp2		Mcm6				Ephx1	Cmpk1	Ppm1b	1700023F06Rik	Ndufv3	Sowahc
268	Loxl2	Myrf		Mrpl18				Iqgap1	Crybb1	Fam43a	Tekt2	Ap3b2	Aga
269	Isl1	Rpa2		Ppil1				Fuca2	Rfx6	Stard10	Fam20c	Actn3	Filip1
270	Cdc42ep2	Col5a2		Pmf1				Aldh3b1	Jup	Cxxc5	Saraf	Rnf138rt1	Ak1
271	Wwtr1	Rad51		Ak2				Rhoj	Fgd4	Ccdc28b	Ids	Edem2	Selk
272	Mmp16	Hmgb3		Vrk1				Mpp1	Ypel5	Ap2m1	Anxa6	Mapt	Wipi1
273	Arhgdib	Efna1		Rad51				Pvrl2	Dll1	Tuba4a	Nudt11	Ttll7	Tmem184a
274	Sfr1	Ccdc34		Llph				Junb	Paip2	Iapp	Prrg2	Ypel3	Lmo7
275	Tsc22d1	Tshz2		Uhrf1				Nrtn	Vps72	Tmsb15b2	Atp2a2	Wfs1	Fam122a
276	Spats2l	Pln		Fabp5				Tmem229a	Gck	Pla2g2d	H2-Ke6	Rimbp2	Tmed8
277	Sox11	Fmod		Bex1				Tspo	Chic2	Sod2	Akr1c13	F3	Fxyd6
278	Fbn1	Cox6b2		Cct8				Ptgs1	Tbpl1	Enho	Cltc	Tmem258	Atp6v1b2
279	Hoxb2	Ly6e		Tcp1				Tmem116		Cfap20	Fam92b	Hsp90b1	S100a13
280	Fxyd7	Hist1h2ae		Nip7				Igsf3		Gprasp2	Eif1b	Tmem163	Cystm1
281	Efna5	Anxa3		G3bp1				Vtcn1		Vasp	Fev	Dnmt3a	Araf
282	Wisp1	Cdkn3		Ghitm				Tenm4		Tmed4	Pcsk1	Ptbp3	Gdap1l1
283	Tmem176b	Cdc42ep3		Cym				Col27a1		Sphkap	Card19	Smap2	Th
284	Flrt3	Cenpq		Haus1				Trip6		Atp8b1	Pnmal1	Pea15a	Gadd45g
285	Flnc	Shcbp1		Nrp1				Prox1		Txnip	Phip	Guk1	Atp6v0d1
286	Tspo	Calml4		Snrpd3				Prr15l		Usf2	Pla2g1b	Cnot6l	Meg3
287	S100a11	Tubb2a		Snrpd1				Rbbp7		Usp9x	Upb1	Pnmal1	Slitrk6
288	Tmsb10	Hist1h1e		Carnmt1				Oaz2		Kif5b	Fndc3a	Lrp8	Gng4
289	Tln1	Atad2		Rnase4				Grb14		Ngfrap1	Mtmr7	Lman1	Gars
290	Rab33a	Hlx		Rrm1				Tcf7l2		Dnajb6	Slc2a5	Lyplal1	Ift57
291	Ckap4	Hmgn3		Nsun2				Fads3		Gipr	Gnaz	Dst	Tmem30a
292	Cd151	Ptgis		Elavl1				Lamb1		Hist3h2ba	Ahi1	Chmp5	Pkp4
293	Shisa4	Sae1		Asf1b				Daam1		Dusp10	Ccdc28b	Prrg2	Spock2
294	1810058I24Rik	Efemp1		Akr1c12				Etl4		Psmc2	1500009L16Rik	Desi1	Nktr
295	Fgfbp1	Ildr2		Espn				Fstl3		Ica1	Itm2b	Gm27033	Ankrd54
296	Plp2	Emp1		Tmed2				Nit2		Arpc5l	Pgrmc1	Ift81	Neurod1
297	Ndufa4l2	Ckap2		Ccdc58				Fermt1		Ocrl	Akr1c12	Tpst2	2610524H06Rik
298	Nid1	Tln1		Cdc123				Osgin2		Ift22	Fam174a	Klhl7	Ddr1
299	Ptgr1	Ugp2		Bckdk				Tmbim6		Elavl4	Ly6e	Baiap3	Itm2c
300	Lox	Dlk1		Mrps10				Gadd45b		Efcab10	Cdkn2d	Ica1	Tcta
301	Gbp2	Cdkn2d		Snrnp40				Nr5a2		Fam20c	Mrpl1	Cst3	Tmed6
302	Ifi27l2a	Fis1		Rps26-ps1				Qsox1		Mrps33	Gm5617	Gm10941	Dpp6
303	Selm	Net1		Nfyb				Csrp1		Myef2	Tmed3	Gnaz	Dtnbos
304	Gpx7	Cd82		Ccdc34				Gja1		Gse1	Kif12	Usmg5	Sh2d3c
305	Id3	Crip2		2700029M09Rik				Ass1		Ube2b	Gadd45g	Mapk15	Fam151a
306	Cdc42ep3	Bub3		Nt5dc2				Eef2		Gpd2	Ppp1r37	Lyve1	Cisd1
307	Hspb8	Nab2		Smarca5				Capn6		Kdm7a	Btbd17	Por	S100a1
308	Fam162a	Epha3		Gusb				Ctsb		Wbp2	Plcxd3	Naga	Rcan3
309	C3	Ywhah		Stra13				St3gal5		Syt7	Gm561	Pkp4	Ccpg1os
310	Ehd1	Eln		Exosc5				Ogt		Ddx5	Ndufv3	Tshz1	Tmem59
311	Nfia	P4ha1		Nasp				Stxbp6		Dda1	Sst	Srp54b	Prrg2
312	Nab2	B2m		Stt3a				Grb7		Slc29a1	Prox1	Golga4	Lrp11
313	Slc25a4	Itm2a		Mrps28				Gltscr2		Rimbp2	Eif4a2	Ppy	Ghr
314	Mxd4	Bst2		Mpp6				Cyba		Phyh	Kif5b	Mafg	Gm42418
315	Hotairm1	Stk26		Gins2				Grn		Akirin1	Mien1	Kif21a	Gm14964
316	Klf4	Tyms		Akap7				Cdc42ep1		Pea15a	App	Pofut2	Ssbp4
317	Tmem176a	Zfhx4		Afp				Anxa7		Kif12	Hspa4l	Tpd52	Rimbp2
318	Stk26	Raly		Bzw1				Ptpn18		Pde1c	Rnf138rt1	Plpp5	Ptprn2
319	Bnc1	Maged2		Atad3a				Chmp2b		Pld3	Itfg1	Chd7	Akr1c12
320	Cacnb3	Fras1		Nucks1				Psme1		Klf10	Kmt2a	Stat3	Dnase2a
321	Cfl2	Arxes1		U2af1				Tcn2		Txndc12	Wdr6	Fmo1	Unc5c
322	Lpl	Rarres1		Ube2i				Decr1		B9d1	Sesn3	Srpr	Ctsz
323	Zyx	Ptgr1		Cldn10				Phldb2		Atp6v1f	Tcta	Banp	Khdrbs3
324	Gsta4	Abcg2		Emg1				Tnfrsf12a		Gdpd1	Reep6	Mid1ip1	1110008P14Rik
325	Crtap	Dut		Gtpbp4				Eps8l2		Ppp1cb	Hist1h1c	Spcs3	Mast4
326	Atg3	Cdca2		Psmd14				Oat		Atp6ap1	Cfap20	Slitrk6	Rsph9
327	Tgfb3	Psip1		Srsf1				Aqp1		Dnm2	Ubxn6	Pja2	Cbx6
328	Sdc2	Rad51ap1		Hmgb1				Kcnq1		Mrfap1	Ostf1	Arfgap3	Gnai2
329	Gga2	Anapc11		Tubb4b				A730098A19Rik		Maged1	Tpd52	Sec24d	Wfs1
330	Rarb	Nfic		Tspan13				Stard3		4833439L19Rik	Rimbp2	Cltc	Stard5
331	Golim4	Loxl1		Hmgn2				Clic1		Atp6v1c1	Slc25a53	Glrx	Ttll7
332	Praf2	Hoxc5		Ffar2				Alcam		Dctn2	Trappc6b	Fos	Mapk15
333	Ly6e	Kif15		Gspt1				Paics		Tprgl	Wnk1	Nt5c3	Zfhx2
334	Frem2	Hist1h2ap		Wdr12				Gstm2		Gnaz	Gpc4	Sod2	Ubl3
335	Gabarapl1	Cenph		Brcc3				Deb1		Ttr	Adprh	Hist1h2bc	Pdia3
336	Pvrl2	Trim59		Nudt5				Tmem176a		Med28	Bax	Gpsm1	Rnf130
337	Use1	Trip13		Ptp4a1				Gstm1		Actr10	Ap3b2	Hist1h1c	Tgoln1
338	Zbtb7c	Sbspon		Mrpl13				Kcnk5		Arrdc4	Dnmt3a	Bet1	Map2
339	Zfp503	Cxcl13		Sdf2l1				Kcnq1ot1		Slc35d3	Akap9	Hid1	Nnat
340	Grina	Celf2		Ezh2				Aldh7a1		Trp53i13	Map9	Hap1	Txnip
341	Hdgfrp3	Ehd2		Syncrip				Ralb		Mtfp1	Atp6v0e2	Tcta	Sct
342	Gm42418	Cpxm1		Nup37				Fgfr3		2310022B05Rik	Phyh	Bbip1	Prkacb
343	C1qtnf4	Sfr1		Mgst1				Tle2		Tm2d1	Trp53i11	Ift20	Rc3h2
344	Atf3	Marcks		Serf1				Tfrc		Sesn2	Golgb1	Nktr	Tspan7
345	Metrnl	Tmsb10		Mif				Shank2		Alg2	Ffar2	Sdccag8	Fosb
346	Alcam	Tmpo		Cd24a				Sestd1		Pik3r1	Neu1	Alg2	Ncstn
347	Pmm1	Cdc25c		Phb2				Hsd17b10		Tmem199	Gaa	Slc16a10	1110032A03Rik
348	Camk1	Ube2e2		Gmps				Scd2		Trp53i11	Olfm1	Itm2c	Rabgap1l
349	Dlc1	H1fx		Txnl4a				Ank3		Slmo2	Stx7	BC031181	Usp29
350	Hlx	Hoxb6		Chchd4				Hnf1aos1		Med25	Cyth2	Tspan13	Alcam
351	Trip6	Arl4a		Cnbp				Rps29		Pycr2	Zfp516	Dtnbos	Fam20c
352	Gnb4	Ube2e3		Stoml2				Aes		Sh2d3c	Cdkn1a	Kctd13	Dnmt3a
353	Flna	Gpx7		Sfxn1				Sod3		Mrpl57	Ccdc88a	Cdk2ap2	Ptbp3
354	Gata6	Flna		Bola1				Msi2		Ube2w	Pop5	2610524H06Rik	Ankrd12
355	Eid1	Flnc		Mrpl50				Bag2		Arpc3	Cbx6	Hspa13	Hpgds
356	Fras1	Gins2		Ppat				Rabggtb		Sin3b	Vat1l	PISD	Mboat4
357	Ogt	Fam111a		Mrps18b				Ctgf		Fxyd6	Pycr2	Abcb9	Manf
358	Arhgap10	Odc1		Vps36				Hdac11		Aco2	AI413582	Blcap	Casc4
359	Col18a1	Runx1t1		Ndufaf4						Vdr	Ece1	Vps37a	Atp6v0e2
360	Socs3	Mgp		Farsb						Slc25a11	Rab3d	Abcd3	Dst
361	Klk14	Fbn1		Mybbp1a						Krt8	Cd164	Pop5	Tvp23b
362	Capns1	Plp2		Sae1						Tmem9b	Cfap36	Rufy3	Arl3
363	Rabac1	Tspan6		Hmmr						Chmp2a	Cacna1a	Fxyd6	Cmip
364	Timp1	Arxes2		Fkbp4						Drap1	Ppp2r5b	Tbcb	Tmcc3
365	Ube2l6	Smc1a		Psmd12						Rnf5	Gls	Bmyc	Dnajb9
366	Slc48a1	Fkbp9		Id2						Cmpk1	Akirin1	Prkar1a	Ly6e
367	Gm15050	Hmg20b		Prdx4						Ubb	Serpina1b	Mrps33	Gaa
368	Myl12a	Rbm28		Plk1						H2-Ke6	Serpine2	Pdia5	Tcaf1
369	Pgrmc1	Eri3		Hat1						Jagn1	Usp51	Cacna1a	Ostc
370	Atp2b1	Clic1		Rcan2						Tmem57	Ppp1r9a	Rab1a	Phip
371	Msn	Dbf4		Wfdc2						Tmsb15l	Hsph1	Krt7	Pim2
372	Lhx9	Maf		Nars						Elp4	Rcan3	Dad1	Sim1
373	Tex264	Sptbn1		Nr0b2						Ginm1	Prkar1b	Ghr	0610009B22Rik
374	Chd3	Cep55		Eif1a						Fam135a	Mdm1	Gmppa	Dnajc12
375	1500015O10Rik	Ugdh		Ndufab1						Gpx2	Nkiras2	Itpkb	Hspa13
376	Npdc1	Nrep		Me2						Neurod2	Fabp3	Trabd	Zfp667
377	Grn	Plpp1		Nup85						Coa3	Pgap1	Nagk	Saysd1
378	Nsg1	Ndc80		Cct4						Trappc2	Mrfap1	Prdx3	Rufy3
379	Gjb5	Dlc1		Mettl1						Fam122a	Desi1	H2-K1	Prox1
380	Ssbp2	Col6a2		Smc4						Pfdn4	Apom	H2-Ke6	Ankrd37
381	Prss23	Gpc3		Nup62cl						Hpca	Ankrd17	Stx7	Myo6
382	Tgfb2	P3h1		Ptges3						Lpar6	Tmem199	Tmem9b	Pla2g6
383	Cox6b2	Hoxa7		Cldn7						Ypel5	Chmp2a	Epb41l3	1300002E11Rik
384	Hand2	Srsf2		Dynll2						Smim22	Sod2	Mpp3	Fbxl17
385	Rbms2	Rangap1		Gpc3						Cspp1	Gng4	Slc35g2	Ppp2r5b
386	Akr1b8	Kif4		Tmpo						Ap3s1	Glrx	Slc43a2	Sec11c
387	Txndc5	Diaph3		Acp1						Exoc7	Efcab10	Sec61a1	Slc29a1
388	Bnc2	Gmnn		Fcf1						Klf7	1700056E22Rik	Gstz1	Tnrc6b
389	Frmd4b	Nenf		Phb						Dynlrb1	Tpst2	Pla2g2f	Abcd3
390	Il18	Clspn		Comtd1						Hspa4l	Dctn2	Cotl1	Cspp1
391	Mpzl1	Anp32e		Noc4l						Gast	Pkib	Gipr	Nisch
392	Ikbip	Lgals3		Mrpl17						Trappc6b	Tmem30a	Magt1	Herpud1
393	Plec	Gnb4		Nup43						Grina	Riiad1	Trim35	Tmem176a
394	Tmem150a	Ezh2		Psme3						Usmg5	Pigk	Zfp568	Apip
395	Tns3	Ktn1		Grwd1						Riiad1	Elof1	Fam122a	Slc35b1
396	Fscn1	Anln		Tmem54						Syt5	Nagk	Sar1b	Ergic3
397	Procr			2810004N23Rik						Mfap4		Napa	B4galt3
398	Armcx1			Hnrnpa3						0610009B22Rik		Slc16a12	Ncoa7
399	Ilvbl			2700094K13Rik						Malat1			Daam1
400	Dtx3			Itga6						Fbxo44			Sod2
401	Crabp2			Fam96b						Cadps			Dtx3
402	Rsrp1			Dars						Eif1b			Syt5
403	Pgm5			Coq7						Glrx			Vps37a
404	Ankrd12			l7Rn6						Pdk3			Nfe2l1
405	Arid5b			Rnaseh2a						Tonsl			Foxa2
406	Sesn3			Mrps14						Lmna			Olfm1
407	Ahnak2			Rhov						Cdkn2d			Wbp2
408	Sema3d			Tsfm						BC048546			Rfx6
409	P4ha2									Hmgcr			Cltc
410	Hbb-y									Rab11a			Nat14
411	Clic1									Tmem30a			Lpcat3
412	Zfhx3									Ccnt2			Rab27a
413	Rhoj									Naa20			Phyh
414	Plxna4									Acadvl			Klhl7
415	Chst12									Pgf			Chmp5
416	Mtfr1l									Bpnt1			Pja2
417	Oaz2									Pafah1b1			Slc38a5
418	Por									Snap25			Spcs3
419	Hoxb6									Vbp1			Stc1
420	Runx1t1									Resp18			Kif1a
421	P3h3									Fxyd3			0610011F06Rik
422	Fam114a1									Tmem206			Entpd3
423	Zfp57									Itfg1			Tspan8
424	Cmbl									Fhl2			Col9a2
425	Gabarap									Cstf3			Atp6ap2
426	Elovl1									Gnb2			Srpr
427	Sgce									Pdhb			Pgrmc1
428	Fndc1									Cotl1			Zcchc18
429	Hexa									Eif2b2			Gspt2
430	Sult5a1									Tor2a			Yipf2
431	Cyp2d22									AI467606			Ank3
432										Pcsk2os1			Tceal1
433										Atp2a2			Eid1
434										Mkrn1			1700026L06Rik
435										Emc7			Gm561
436										Cox17			Nrsn1
437										Ppp1r14c			H2-Ke6
438										Lamp1			Cxx1a
439										Dnmt3a			Fbxl15
440										Ube2v2			Bsg
441										Trappc3			Egr1
442										B9d2			C1qtnf6
443										Arf5			Os9
444										Sdf4			Vat1l
445										Pja2			Fgd2
446										Cdc42se1			Anxa4
447										B630019K06Rik			Slc35g2
448										Itm2c			Pigk
449										Cryzl1			Hspa1a
450										Tcp11l2			Limd1
451										Trappc4			BC004004
452										Fip1l1			Rabac1
453										Tiprl			Surf4
454										Gabarap			Meox1
455										Map2k1			Malat1
456										Atp6v0e			Fam155a
457										Dynlt1f			Nckap1
458										Nt5c2			Pik3r1
459										Phyhipl			Tmem106c
460										Disp2			Foxp1
461										Pex7			Cd164
462										Sqstm1			Sdf2l1
463										Riok3			S100a11
464										Timm17a			Rbfox2
465										Arl3			Tmem108
466										Uqcc2			Uqcc2
467										Pbxip1			Lysmd2
468										Polr2g			Fabp3
469										Tmbim4			Faah
470										Gjd2			Nek1
471										Tpgs1			Btg2
472										Akr1c12			Fkbp9
473										Prmt2			Tspan12
474										Pop5			Kidins220
475										Pcbd1			Chid1
476										Map1lc3a			Per3
477										Gprasp1			Lima1
478										Kcnmb2			Lrif1
479										Cmip			Galnt18
480										2310036O22Rik			Slc16a12
481										Ddx6			2300009A05Rik
482										Prr13			Pja1
483										Ube2e3			Rap1gap2
484										Camk2b			Stx1a
485										Slc25a53			Mia3
486													Tmed4

## Sheet: Supplementary Table 5
Supplementary Table 5. Clustering of pancreatic progenitor, differentiated and mesothelial cell expression profiles for genes robustly associated with the top 1,000 cluster marker regions that are accesible in cells of the MesothelialUpk3b-low scATAC-seq cluster (data for the E17.5 mouse embryonic pancreas).
Cluster 1 (Mesothelial)	Cluster 2 (Mesothelial and Ductal/BP)	Cluster 3 (Mesothelial, Ductal/BP and EP/endocrine)	Cluster 4 (Ductal/BP)	Cluster 5 (Tip/Acinar)	Cluster 6 (EP/endocrine enriched)
Emp1	Sh3pxd2a	Cd99l2	Tns1	Rabgap1l	Vps8
Htra1	Dpp4	Lima1	Adamts16	Man2a1	Ntrk2
Nid1	Creb3l2	Col4a3bp	Kcnq1	Fbxo16	Scnn1b
Fbn1	Frmd4b	Rnf216	Elf5	Bok	Prkce
Loxl1	Nfib	Ccng2	Daam1	Ghr	Pde10a
Ptgis	Arid5b	Cdca2	Col4a1	Smim14	Ttc39b
Serping1	Rgs3	Tshz2	Col4a2	Ctrb1	Fam155a
Igfbp4	Dlc1	Arpc3	Dab1	Fam129a	Robo2
Fbln2	Ndn	Phldb2	Tenm4		Cyfip2
	Mpzl1	Ppp2r2b	Slc44a3		Khdrbs3
	Spats2l	Frmd4a	Fgfr2		Mcf2l
	Rarb	Ppp1r9a	Laptm4b		Rock1
	Ptprd	Ncam1	Bicc1		Cpe
	Smoc2	Auts2			Syt13
	Gsn	Galk2			Runx1t1
	Add3	Auh			Dst
	Fbn2	Nav1
	Nkd1	Exoc7
	Mxra8	2310022B05Rik
	Col5a2	Fam220a
	Dab2	Haus7
		Ddc
		Cdc6
		Slc1a3
		Tln2
		Cntfr
		Ntm
		Mfap4
		Rab28
		Eif4g3
		Cep41
		Pgf
		Cdk14
		Ramp2
		BC004004

## Sheet: Supplementary Table 6
Supplementary Table 6. Integrated human and mouse embryonic pancreas 10x single-cell RNA-seq clustering (data from 4-11 weeks post-conception human embryonic and E12.5-E17.5 mouse embryonic samples, integrated with cells of the Procr+ cell cluster retrieved from Wang et al. adult mouse pancreatic islets). Cell cluster markers (adj. P-value<0.05) ranked by Average log2 fold change.
	Cluster
Marker #	Mesothelial	Mesothelial pr.	Mesothelial/MPC	MesothelialTBX3+ early	MesothelialTBX3+ late	Ventral MPC	Dorsal MPC	Tip	Tip pr.	Acinar	BP	BP pr.	Ductal	EPearly	EPlate	Fev+	α	β	δ	ε	Polihormonal	EHBD	PB
1	IGFL2	HOXB9	MYOD1	AC010251.1	FAM230C	AC084880.2	AL360013.3	AC069410.1	SLAMF7	DMBT1	TIMP4	CXCL10	AC016240.1	GSG1L2	NEUROD2	PRR33	FOXR2	SCRT2	GHSR	AC010551.3	LINC02287	PCGEM1	MLN
2	AHNAK2	BATF3	PRRX1	ATP6V1G3	AC062004.1	LINC02059	SOX3	MIR548A1HG	VPREB3	AQP12A	CYP4F12	EPPIN	AC137735.1	GPR17	NHLH1	GNAT3	C8B	TMEM215	AL355990.1	AL035443.1	AC010641.1	LINC01194	TMEM207
3	SLPI	EMX2	MMP9	AC026688.2	MIR548XHG	AL023806.2	LINC02717	LINC02477	CD19	ZG16	B4GALNT2	ESCO2	AC137735.2	HMX2	BHLHE22	GIP	LIPK	TRPM2-AS	AL158038.1	AL354994.1	C5orf38	CRHBP	AL354741.1
4	WFDC1	IQCA1L	SYT6	SPRR2B	AL512452.1	AL357078.2	AC011840.1	AC092957.1	ENDOU	CUZD1	SUCNR1	CDKN2C	AP001790.1	SERPINB12	KLK12	AVP	VNN3	LINC00951	SST	LINC01654	AL033380.1	LINC00707	AL121790.2
5	CLIC3	KLK14	GDF10	LINC01717	GREM1	AC018521.4	AC084880.2	AC103758.1	SLAMF6	PRSS3	GABRP	SYNGR4	AC020905.1	BHLHE23	BHLHE23	MBL2	CTXN2	UCN3	AC021915.1	OR1L4	GCG	ALKAL2	THRB-IT1
6	DHRS9	GPR50	RXFP1	AC012574.1	GRM7	AC109492.1	LINC00934	AL354794.1	MZB1	ITLN1	AADAC	SKA1	CFTR-AS1	FOXD3	SFTPC	ADGRG4	HCAR2	FFAR3	AC004147.3	AC016650.1	SCGB2A1	AC093459.1	AL356495.1
7	KLK5	LHX2	CDHR4	LINC01300	LINC02770	AC092143.2	GJA4	GALNT17	BTK	PDIA2	CLDN2	SCNN1G	ARHGAP40	TLX2	TGM7	GPR6	AC130404.1	PRSS53	CRH	TTTY4C	AC013733.2	AC087477.4	LINC02672
8	OASL2P	PLN	ADRB3	SNTG1	AC079352.1	AL500522.1	HLA-F	LINC02233	KLHL6	KLK1	KCNN4	CDCA2	FUT3	HOXD4	KRTAP4-3	CARTPT	ADH7	PAUPAR	ASIC5	AP005019.1	IL17A	LINP1	SHH
9	FAM180A	DMRT3	CTXN3	LINC01082	AC110014.1	AC008539.1	AC018521.4	LINC02261	PTPRCAP	RNASE1	CALR4P	ANKLE1	AC137735.3	TTLL6	EPB42	PRSS50	SERPINA7	GDF3	AC239802.2	MT1B	AC066612.1	LINC02515	URAD
10	MROH2A	FGF5	ABCD2	AC090138.1	AL353138.1	NXF2B	AC008539.1	AC020584.1	GATA1	CTRL	KRT23	AURKB	CFTR	CIB3	AC093610.1	PABPN1L	PCK1	PPP1R27	AC012513.1	HSFX4	LINC01370	LINC00682	PITX1
11	CLEC3B	MYBPC1	TLX1	WNT16	AC066585.1	AL358933.1	AC068759.1	COL28A1	SASH3	CABP2	SPACA7	MTFR2	AC024592.2	KRTAP4-3	TTLL6	GAST	GCG	SYNDIG1L	AL590727.1	AC004549.1	AC087855.1	ANKRD30B	C5orf66-AS1
12	MYH2	BHLHA9	SPARCL1	AC006033.2	AC104574.2	AC005606.2	SPATA16	AC096555.1	APOBEC1	PNLIPRP2	AIRE	AURKA	LINC00316	CCK	HRH3	CCDC190	C5orf38	MAFA	AC024610.1	AL353608.2	CCDC188	LINC02118	IHH
13	STEAP4	EMP1	TRPC5	BISPR	TBX5	HID1-AS1	ATOH1	SLC16A12-AS1	CD79B	AQP8	MAL	NEIL3	VGLL1	PHOX2B	LINC02715	TAC1	NXPH1	AL139275.1	LINC01019	KRTAP1-3	KLRC2	AC010737.1	SP8
14	LRRN4CL	KRT76	MANSC4	LRRC4C	AC009951.5	AC073863.1	AC068787.5	AC091100.1	IKZF1	GNMT	SLC22A2	P2RX2	AC000061.1	EPB42	KRTAP16-1	C2orf70	SLC4A10	G6PC2	AC011824.2	AC003087.1	LINC01014	AC012078.2	NTS
15	GJB5	TCEAL6	OTOR	FENDRR	C7	OTX1	ST8SIA6	ZNF385B	TRAF3IP3	CPB1	ALOX12	HIST1H2AL	LINC00514	KRTAP17-1	PAX4	IRX1	IRX2	LINC02653	TRPM3	AC025465.3	AL133343.2	AC087477.5	AL392023.1
16	TMEM155	SERPINB10	GAP43	AL359924.1	AL022151.1	LINC00934	AC239727.1	ADAM7	LECT2	PRSS1	DCLK3	INCENP	AL139275.2	DLX2	CHRNA1	EFCAB10	AGXT	PEX5L-AS1	PDYN	AL137800.1	LINC01976	AC093895.1	MS4A8
17	SLC10A6	APLN	FOXD3	LCNL1	AC079382.2	CISTR	LINC02703	AC092747.1	CD3E	SLC26A9	PPP1R1B	HIST1H1B	CERNA2	CSF3	CD40	FEV	UOX	ARHGAP36	PPP1R17	AC068286.1	MIR7-3HG	AC073348.2	SI
18	IRS3P	VSTM2B	FAM162B	SERPINB7	AL355306.2	AC133540.1	AC129492.4	NOS1	C17orf99	PKD1L2	HAO2	HIST1H2BO	AC025154.2	DLX1	CD2	PGPEP1L	OTC	TNFRSF9	LINC00967	AGBL1-AS1	LINC02440	PPBP	AC113133.1
19	AP000561.1	EMX2OS	HSF4	TMEM235	DGKB	AC055717.2	AL049812.2	SLC2A14	PTPN7	CELA2A	ALDH3B1	FAM83D	KRTAP10-4	IGFBPL1	NEUROG3	CCL17	SLC34A1	AC074124.1	LINC01370	AC015853.1	DHRS2	PCDH11Y	CSMD3
20	LGALS7	HOXC5	TGFBI	AC073941.1	LINC02712	AC016526.4	LINC01783	LINC02305	IL7R	MYL10	FMO2	HSD3B2	NXPH4	KRTAP16-1	KRTAP17-1	WI2-2373I1.2	IRX1	FFAR1	AL592164.1	AC084871.1	LINC02470	PTPRR	CDH17
21	ZBED2	FGF8	TLX2	AP001208.1	AP005262.2	NHS	AC068787.2	PIP5K1B	POU2AF1	SLC25A47	SLC28A3	HIST1H2BM	AC139720.2	MEGF11	SEMA3G	PI16	DIO1	AC024614.4	AC011824.1	AC003684.1	NOL4L-DT	ITIH2	TTC6
22	MSLN	GUCY2F	OSR2	OR10G8	DNM3OS	LINC01198	NHS-AS1	MACC1-AS1	PADI6	TMED11P	OSGIN1	PLK1	AL731533.2	SFTPC	EYA2	BRS3	AVPR1B	SPINK13	NAT8	AC131956.2	GPR42	CLVS2	FGB
23	RAB7B	ZMYND15	HIC1	AC040174.2	PIEZO2	AC007652.3	AL133367.1	AC006517.2	MYB	ARHGDIG	CLDN8	EME1	MYO3B	FEV	TNP1	ZCCHC18	KLRC2	AC005692.3	AC004147.5	LINC02819	LINC01886	AC004704.1	AC092894.1
24	COL6A5	KLK10	NFAM1	AC010980.1	CA10	CHL1-AS2	AL161908.1	AC119673.2	TINAG	BHLHA15	MMP7	COX4I2	AL136234.1	ANKRD2	GSG1L2	FAM183A	GABRD	LINC02414	AC004147.2	AC095030.1	AC096564.2	AC092131.1	THRB
25	AKAP2	BPIFB5P	PRRX2	AL023574.1	AC093765.4	AC084361.1	AF196972.1	ASTL	TNFRSF13B	NLRP6	CP	WFDC13	AC111000.4	NPTX2	AP000550.1	ABCB11	GPR119	AC104129.1	AL133419.1	SBK3	AL365361.1	AP005210.2	PCAT14
26	GBP2	S100A3	RAMP3	RSPO2	ZFHX4-AS1	LIN28A	AL513128.1	AC109441.1	CD48	PRSS2	TINAGL1	AUNIP	AL590226.2	GRIN2C	CRYBB1	R3HDML	BTBD11	SLC30A8	ZP1	AL353681.1	SST	AC092422.1	AC005256.1
27	MEDAG	C1QL2	ACTG2	LINC02723	LINC01205	EPO	LINC02388	MYPN	TP63	TFF2	NR1I2	RXRG	KIAA1210	C2CD4B	MEGF11	SULT1D1P	AGXT2	NPY	LINC01035	CLEC4G	C22orf42	AC109129.1	AL353784.1
28	TBX18	HOXA7	SHE	CSMD1	LUM	GJA4	LINC02546	SLCO2B1	LYL1	CCR2	WFDC9	NRARP	LINC01721	POU3F4	SLC39A2	GAD1	AC066612.1	TDRG1	SKOR2	AL121672.3	AC137932.2	ANO4	PRDM1
29	TNFRSF11B	HOXA-AS3	TRIL	AC005100.2	LINC02237	SOX17	AC027458.1	LINC02580	CD6	ALDH1L1	CYP4F8	ASF1B	TSPEAR	PAX4	CER1	ABCC12	ABCC12	AL391704.1	PDZPH1P	OR56B1	INS	LINC00278	LINC01895
30	LRRTM1	CXCL14	PHOX2B	PRCD	AC087379.2	SOX3	LINC01427	AL139815.1	KLF1	MCEMP1	GJA6P	ACAN	AC010636.1	PHOX2A	CD96	SLC38A5	BRS3	MUC4	AC024610.2	LINC00967	AL359764.1	AL606923.2	LINC02565
31	ANXA8	SMYD1	ABCC9	TMEM225	RXFP2	AC138304.1	AL022337.1	CTRB2	PBK	KCTD14	WFDC3	HIST1H4A	XIRP2	POU3F1	BTBD17	ELMOD1	MAP3K15	LRFN2	AC069228.1	AL080313.2	MRLN	LRRC55	AL121578.3
32	ADAMTSL5	MSC	EBF3	AL592463.1	AL603840.1	FAM87A	AC010834.2	LINC01624	POU2F3	ATG9B	ATP1A2	CKAP2L	AF064860.2	DBX2	POU3F1	POU3F4	C2orf70	GP9	AL353740.1	AC018371.1	LINC02382	HTR2A	FOXA1
33	TPBGL	CDKN2C	SAPCD1	SERPINB13	LINC02511	AC008945.1	AC126407.1	AL109910.2	NEPNP	AMY1A	POF1B	MMP7	RHEX	SLC17A7	RHBG	DPPA5	RGS4	CADM3-AS1	AC011899.1	AC078942.1	AL513128.2	AC090340.1	MIR122HG
34	C2orf40	FXYD7	PADI3	AC022168.1	SYT1	AC078883.2	AC022973.3	AC007099.1	INPP5D	TMEM56	DNTT	SHCBP1	AC147651.2	CES5A	NKPD1	GAL	MSTN	INS	FRMPD4	AC079329.1	AC069404.1	LINC01748	SAMMSON
35	GPR88	KCNA1	FABP7	PAGE4	DGKI	AC239727.1	AL136090.2	AL133325.2	PLA1A	CELA3B	TMEM229A	CDCA5	SSTR1	HPCA	AP003049.2	CACNG5	LINC01976	SCNN1B	LINC00836	LINC02216	PNMT	AL353586.1	AC010998.3
36	MYH8	NRGN	KAZALD1	SPRR2F	LINC02267	U91319.1	CLEC18C	NRG4	KRT77	ADM2	VNN1	HIST1H2BL	INPP4B	BTBD17	SLCO4A1	DMRTC1	AC011246.1	AL365361.1	AC079411.1	AC104137.1	TMEM190	BMS1P14	AC010931.2
37	MRGPRF	NKX2-8	SLITRK5	AC105446.1	IL1RAPL2	AC012494.1	AL163636.1	MKNK1-AS1	VAV1	TSPAN1	CD14	PBK	AP003498.2	CDKN2A	SULT2B1	IRX2	OXTR	AC004054.1	AC117461.1	LINC02162	GPC5-AS1	TPO	ONECUT2
38	THBD	TNFAIP6	TP63	TSHB	AP005120.1	AC093864.1	AC006511.6	CHRM3-AS2	BANF2	HSD17B13	TLR3	GJA6P	AC073130.1	CD2	LHX1	MBOAT4	APOD	ACVR1C	AC097468.2	AL356489.1	CALY	AC010889.1	TLX3
39	TGM1	MUC16	ISLR	PLSCR5	LINC02507	LINC02717	AC114316.1	AC005280.1	SSTR5	CLDN18	TRIM47	CEP55	GGT2	CARTPT	IL11	CTXN2	AL138694.1	CLEC12B	PPFIA2	AL356364.1	MAFA	AC099792.1	AL136441.1
40	CD34	SOWAHD	HSD3B2	AL354863.1	AC018618.1	LINC00487	AC109492.1	CLDN10-AS1	SAPCD2	ITGB2	TMEM45A	FGG	AL021392.1	CER1	MFNG	TH	ARX	S100Z	AC007391.2	AC009102.1	KCNA3	PLEK	FGA
41	BST1	OPTC	DIO3	AC025508.1	PCDH11X	AC039056.2	NHS	AC007091.1	HIST1H1B	UPK3A	FMO1	CCNF	AC007906.2	NEUROG3	SIGLEC12	PIM2	AC005414.1	AC082651.3	MYT1L-AS1	PTCHD4	AC004147.2	AC068787.5	ONECUT3
42	PRKAG3	BARX1	CACNG7	MIR1-1HG-AS1	AC110760.2	ETV3L	NWD1	LINC02046	ESCO2	SYCN	S100B	ESPL1	GGT6	CD22	HPCA	B3GNT3	ANKRD55	AC010641.1	AC024614.4	AC023490.2	AC018730.1	LIM2	CBLIF
43	CPZ	RSPO3	EDNRB	KCNE1B	AC006004.1	LINC02490	NLRP12	AC074033.1	AMY2A	TSGA10IP	GSTA3	SKA3	UGT2B15	IL11	PPP1R14A	GPR119	RESP18	GRIN1	LINC02661	AC131956.3	C1orf158	LINC01198	AL031676.1
44	WNT10A	FOXF1	LOC728392	AC091938.1	GRID2	AC010789.1	AL513320.1	KCTD16	ANKLE1	HP	TMEM213	CDK1	EDN1	PDCD1	GRIN2C	CHGB	PPY	LINC01548	PCDHA2	LINC02685	KLRC3	IFI44L	AC024996.1
45	FGF16	SLC2A4	HOXB5	HAND1	INSYN2B	LINC02464	AC093840.2	AL139383.1	HIST1H2AL	LIPH	PDZK1IP1	IQGAP3	AP000820.2	SLC35D3	GRM2	GJD2	TNR	SYTL4	AL773573.1	AC131956.1	HCRT	SOX5-AS1	SOX2
46	PODN	CHD5	HEY2	CD44-AS1	AC016687.3	IGLV7-46	AL158064.1	LINC00381	SELPLG	AMY1C	SLC44A4	PRIMA1	AC139720.1	ARX	SDS	SERPINA9	AC112770.1	ZP2	AC084361.1	AC116563.1	CRH	AL591686.2	CDX2
47	CASP12	LHX9	TAC3	VGLL2	AP001180.4	AC022239.1	AC006144.2	AC104958.1	E2F2	FAT2	SPINK4	NUSAP1	LINC01896	TAC1	EFCC1	BCL2L15	SLC7A14	P2RY1	DDN	AL139232.1	SLC17A6	ADH1C	THRA1/BTR
48	AQP5	LPL	PENK	SPRR2E	ERG	AC087683.2	CISTR	LINC02417	HIST1H2AJ	B4GALNT1	SLC15A2	HIST2H3A	AL121929.2	SLC39A2	INSRR	C2CD4A	NDST4	TRPM5	AL365271.1	AL135902.1	LINC00951	TMEM246-AS1	AC021055.1
49	AC245041.2	CCDC42	CLEC2L	LINC01081	PGM5P4-AS1	AC078993.1	AC022706.1	AC100863.1	GRAP	GFI1	PAMR1	IL1RN	IL1R1-AS1	DLL3	GPR142	ZFP92	FAM57B	SLC24A2	GABRG2	SOX1-OT	LINC02471	AC087477.2	GSTA2
50	RSPO1	LOR	IFNK	AC125793.1	ADAMTSL3	LINC01482	AL021918.5	AF067845.2	NEIL3	CLEC6A	DDIT4L	NDC80	NECTIN4	FABP7	IGFBPL1	ARX	HHATL	CYP24A1	EYS	AL121581.2	ADGRD1-AS1	GDPD4	LINC01351
51	CST12P	HOXC4	NEFL	OR10G4	CPED1	LINC02739	LIN28A	SIGLEC11	CHN2	LILRB4	KLHDC7A	PRC1	TFAP2E	CYP4B1	GLOD5	CYTH4	SCGB2A1	CDHR1	AC010980.1	LINC02409	LINC01445	CNTNAP5	NKX6-3
52	SLC24A4	HOXB8	NKX2-3	LINC02570	DCLK1	LINC01949	LCMT1-AS1	CCDC110	AURKB	C1QA	C6orf141	KIF23	UGT2A3	SCUBE1	AC020909.2	RAI2	MGAT4C	B3GNT3	Z82196.2	LAIR2	AC012213.4	GNA14-AS1	APOA1
53	BPIFB5P	KRT14	TSLP	SLC18A3	AC093515.1	AC025811.1	AC011853.2	AC022710.1	MBL1P	RGS11	CDH16	FBXO5	AC105046.1	RASAL3	CCK	FAM166A	AL021395.1	AC011824.2	AC013733.2	CACNA1C-AS4	LINC01574	DPYD-AS1	LINC02059
54	LINC01550	KLK13	HOXA-AS3	SPANXB1	AC012339.1	NAV3	AP001208.1	AC096639.1	FBXO5	ZP3	WFDC13	NCAPG	AC002066.1	ADAMTSL2	LMX1B	PAX6	AL133320.2	LYVE1	TDRG1	AC025576.1	AL133320.2	LINC02538	CCN3
55	TREM2	KCNJ8	AGTR2	SFTPD-AS1	AC083906.3	LINC02851	NLGN1-AS1	AL592402.1	GJB2	FBP2	MMD2	CENPL	AF064860.1	EDNRB	MUC15	SERPIND1	DAW1	RPRML	AL024495.1	AL390816.1	KCNK16	AC138646.1	LINC01781
56	BTNL8	CXCL13	PDGFRB	C2orf91	ADRA1A	AC016044.1	FABP6	AC123512.1	RAD51	ZYG11A	LY6G6D	SPC25	GADL1	MFNG	ADAMTSL2	RESP18	ACE2	KCNG3	TRPC7-AS1	AC022916.4	AC093673.2	LINC01889	CDH6
57	KRT15	KCNAB1	NTF3	LINC00545	AL121827.2	ERBB4	AC010319.3	AKR7A3	AURKA	PADI2	UNC5CL	MXD3	DNAJB13	NEUROD2	MIAT	VDR	AVP	VGF	AC026369.3	AC093575.1	AL031658.2	AC125613.1	HAMP
58	B3GNT9	MXD3	NRK	LINC01387	IL13RA2	SPX	HSPA6	AL121839.2	ARL5C	ASS1	EPPIN	NCAPH	PLA2G4F	TRPC5	C2CD4B	PDE6C	AC090993.1	KCNA3	AC023511.3	AC018695.3	CALB2	PLCE1-AS2	COL19A1
59	GJB4	ANKRD34A	TCF15	EVPLL	AL669970.3	FGF13	AL080273.1	DPEP1	GIMD1	SCN4B	STRA6LP	EXO1	AC005307.1	PRR33	KCNK17	ASB4	AC024614.4	SERPINA9	AC020892.1	CACNA1C-AS3	AL035250.1	AL513210.1	KHDRBS2-OT
60	MFAP5	HOXA5	GFRA4	PTGFR	TMC1	AC012462.3	AC010624.5	SNTB1	P2RX1	CTRC	ALDOC	FGR	FAM166C	SLC38A5	AQP9	RIPPLY3	IGSF21	AL035250.1	AL158832.1	AC020909.2	AC010285.3	ZFY-AS1	AC083902.1
61	TM4SF5	AOX3P	CHRNA4	AC105450.1	LINC02847	C8orf49	LINC02397	AC079896.1	PLK1	TBC1D21	APCS	UBE2C	AC017002.5	KCNMB1	TFAP2C	FAM92B	MAS1	GPR42	PRR29-AS1	SOX1	GCSIR	AC069114.1	AC019117.1
62	OPRK1	LPAR4	TMEM100	LINC02377	AC087430.1	LINC02397	SOX21-AS1	AL355073.2	SKA1	MT3	SPP1	RAD51	MYO3B-AS1	SEMA3G	RGS16	CCDC184	AL589765.1	SCG2	AL035250.1	AC090348.1	AC007731.2	AC011297.1	C8orf34-AS1
63	TBXA2R	HOXB7	PTH1R	AKR1B15	GRIA4	NRG2	IFNE	MIR381HG	SRGN	INSIG1	ST3GAL4	DEPDC1	NEURL1-AS1	RBFOX3	CSF3	HEPACAM2	AC006369.1	GJD2	AC021915.2	AC008663.1	CHGA	AC009264.1	AC012494.1
64	LOX	ANGPT4	SRPX2	CDH9	AC037450.1	CHL1	AL365271.1	AC025580.3	ASF1B	AMY2A	PPP1R36	LRR1	SPNS2	GOT1L1	RBFOX3	SLC35D3	AC015921.1	AC113391.1	AC114803.1	AL023775.2	GMNC	LINC00901	S100P
65	ADGRD1	HOXB6	GNGT2	AC007663.2	BDKRB1	LINC02109	AC114321.1	FREM2-AS1	HIST1H2AG	CHST2	GSTT1	KIF20A	AC127521.1	RBM24	LRRC10B	NXPH1	TPH2	AC004147.5	AC097511.1	AL590727.1	PTGDR2	AC068308.1	AP001636.3
66	IGFBP6	NXPH3	C10orf71	OR8D4	ZEB2	LHX5	EVPLL	LINC02432	TMEM54	CELA1	SCARA3	RAD51AP1	SALL3	LHX1	LYNX1	UOX	AC016717.2	SCGB2A1	PRLHR	AC009102.4	SLC22A16	CD86	LINC02726
67	MYBPC2	CST12P	PADI6	LINC02740	ADGRL4	SLC22A31	ATP6V0D2	AC005062.1	PTF1A	LGALS12	DEGS2	E2F8	AC084880.3	CAMK2N2	ANKRD2	ARHGAP36	HS6ST3	TRPM8	OTOF	AC009159.1	SMIM32	LINC02370	AKR1D1
68	TMEM151A	ACKR1	S1PR3	ADAMTS20	AC020687.1	AC010519.1	WASIR2	AC004982.1	NOTUM	CRLF1	VTCN1	TOP2A	TRPC6	GAST	AL356489.3	SCT	POU3F4	SLC17A6	AC096576.2	AC005234.1	LINC00642	AC093912.1	MUC7
69	CHIA	ILDR2	UBA7	AL033543.1	LINC02801	HIGD2B	AC061961.1	MEG9	SP5	ITGAL	CLDN9	SPAG5	STK32A-AS1	GAP43	AL161908.1	TEKT4	GUCA2A	RIMS3	AC011370.1	AL391538.1	HSPA6	PLD5	GLYATL2
70	TMEM119	GJB4	CNRIP1	LINC02465	EDNRA	TEX11	ARID3C	NPAS2	MTFR2	COL7A1	RASSF10	TK1	AC004882.1	MGAT5B	GSG1L	PCSK2	LINC-PINT	WI2-2373I1.2	AC004597.1	AC006064.1	AC104129.1	AHSG	AL359813.1
71	WNT6	BVES	TWIST2	LGALS14	AL024497.1	SP8	AC087564.1	MT1H	LRR1	LDB3	CYP11A1	TCF19	IQCJ-SCHIP1-AS1	SCT	PLK3	FAM3D	KCNH6	SLC2A5	ASIC2	RNASE7	RIPPLY2	LIPI	HMX1
72	HTRA1	LRRN4	ACAN	AC021242.2	AC108734.4	RBAKDN	AL359382.2	AC023051.1	MKX	GGT1	CLCNKA	CCNA2	VGLL3	BCL6B	KCNQ4	CYP4B1	AC131956.2	AC011246.1	UOX	AC097511.1	PCDHA1	LINC02055	AL662890.1
73	CAV1	WT1	PCDHGC5	TPO	AC006062.1	AURKC	AC091138.1	AC104958.2	CDK1	ANG	LBP	HIST1H3B	PPARGC1A	TGM7	KIF19	KCNMB1	TMSB15B	HOPX	AC105402.4	LINC00616	AL138694.1	AL442163.1	AC109492.1
74	REM1	KLK8	FGG	IL21R-AS1	AC106845.1	AC087564.1	SLC24A3	AC007001.1	HIST1H2AI	SLC39A5	INHBB	CDCA8	NEURL1	RHBG	AP003108.1	HS3ST6	RAI2	PCSK1	PTPRZ1	LINC01506	TMEM61	OR3A2	PDE11A
75	CYP2S1	FBLN2	WFDC13	LINC02745	SORCS3	LINC00305	AC020637.1	RBPJL	RRM2	PLEKHS1	HAS3	CLSPN	NETO1	IRX1	ITGAM	CRHR2	FAM3D	ACTN3	LINC01811	GHRL	AL606970.1	LINC02211	AC093840.2
76	KLK7	HLX	RBM46	AC004540.2	AC073172.1	LINC01517	PPP1R16B	AL355073.1	CA14	ADORA1	P2RX2	HIST1H2AH	AC090150.1	GAL	ZNF385D-AS2	SLC7A14	GAST	AF279873.4	AL161851.2	AC020930.1	AL021395.1	LINC00378	CYP2C19
77	XDH	RSPO1	GIMD1	AC009518.1	TMEM252-DT	AC004870.4	CDH9	AP003173.1	OPRD1	GLS2	BMP8B	KIF11	AC087257.1	NHLH1	PGC	UNC5A	SLC35F4	FAM151A	AC254562.2	AL390763.1	AL845472.1	AC246817.1	KCND2
78	SLC7A10	MYL7	LGI2	NKAIN2	AC090809.1	AC020656.2	AC092720.2	AC092168.2	AMY1C	ZNF705A	ICAM1	CDC45	AC004865.2	ELAVL3	DNER	ITIH1	TMEM179	MYO7B	AL358334.4	CHL1-AS1	AC093458.1	VCAN-AS1	KLHL14
79	KCNA4	OSR1	PCP4L1	AC006974.2	KCNQ5	LINC00607	LINC01208	LINC02284	SERPINA6	SCML4	NOXO1	TTK	ANO3	PRRX1	HYPM	TCP11	GPR6	GCGR	PLPPR5	LINC01785	AC010542.5	CDH19	NCKAP5-AS2
80	LRRN4	UPK3B	SNAI2	MAFA-AS1	IFI44	AL139147.1	LINC01492	MIR193BHG	MAT1A	REG1A	TSPO2	BUB1	CASR	R3HDML	LRRN2	TM4SF20	AC244035.1	MYT1L-AS1	LINC02627	AGBL4-IT1	AC112770.1	ZFY	AC012087.2
81	KCNA1	HIST2H3D	LPAR4	KCNG1	AL117329.1	AC116903.2	PTPRT	IL32	PLEKHS1	FAM129A	SALL1	ARHGAP11A	AL590666.4	PLK3	INSM1	DISP2	CIB3	GPR45	KRT25	BX005019.1	C15orf48	DCHS2	AL139379.1
82	B3GNT7	CKAP2L	PRTN3	AC022816.1	LINC01478	LINC02418	C8orf34-AS1	AC090541.1	CDCA5	MPO	CCL20	KIF2C	KRT80	INSM1	LINC01811	AVPR1B	RAB37	TNR	WI2-2373I1.2	AL121908.1	AMER3	LINC01387	AC091182.1
83	NDUFA4L2	CPZ	DUSP27	AC100803.3	LUZP2	LPA	LINC01169	AC024145.1	HIST1H3B	ATP8	SULT1C2	MELK	AC023510.2	PPP1R14A	PLK5	WIF1	LINC01014	CRHR2	AC104350.1	AC126696.2	CKMT1B	AC093898.1	AC061961.1
84	MUC16	ALDH1A2	ENG	AC087427.1	AC093765.3	KIRREL3	LINC01797	NOMO3	AUNIP	EDEM1	SLC17A4	DSCC1	TPM1-AS	VWA5B2	KLHDC8A	PRL	GPR42	FAM166A	AC073336.1	AC084364.3	AL390816.2	NLGN4Y	AC012499.1
85	KRT14	CRABP1	ABCA8	HGC6.3	HRH1	AC004471.1	LINC02831	CDH4	SEMA7A	AGR2	SLC2A2	TICRR	A4GNT	COL13A1	LY6G6E	USP18	AL133343.2	COX6A2	LINC02089	AC008852.1	PRLHR	U91319.1	AC022239.1
86	UPK3B	SOHLH1	CYGB	AL138720.1	S1PR5	APOBEC3H	LINC01938	AC011298.1	HIST1H4D	RAP1GAP	PAH	ATP6V1B1	ZNF208	PCDHGC5	NPTX2	HAP1	AL606807.1	ERO1B	AC091860.2	AC023158.2	AL450311.1	AC140847.2	LRAT
87	FGFBP1	PRRT4	MZB1	AL451048.1	HBG1	LBX2-AS1	AL591069.1	TENT5C	FEN1	NCCRP1	COL9A1	WFDC3	AC008105.3	ITGAM	PPP1R17	C16orf54	ZCCHC18	AP003721.1	AC005293.1	Z99755.2	AC087457.1	AC068787.2	ST6GALNAC1
88	ADTRP	HOXA2	BARX1	CYTL1	PGM5P3-AS1	GHRH	LPA	SLC16A12	CPN1	FKBP11	POU2AF1	TRAIP	LINC02772	PGPEP1L	FAM163B	MAPK8IP2	LINC01886	PPP1R1A	AL589765.1	LYST-AS1	AC012213.2	PRKY	ADH1C
89	FNDC1	CCNA1	SERPINA10	PTPRD-AS2	AC005909.2	AL161431.1	SEZ6L	AC037198.1	AQP4	CELA3A	FAM71A	HIST1H2BB	GRK3	IRX2	ADRA2C	CRYBA2	TMEM86B	CCSER1	AL132801.1	AL121578.2	AC082651.3	HOXD3	LHFPL3-AS1
90	UNC45B	CADM3	HOXB4	TAFA4	AC090709.1	LINC01208	AC006538.1	AL353660.1	ASNS	GRPR	SCX	KYNU	ACSS1	AVP	PLA2G2F	CDHR1	AC007495.1	SNCB	SULT1D1P	LINC01831	LINC01885	TTTY10	AL096814.2
91	AOX3P	RPP25	NEPNP	AP000915.2	MDGA2	AC007432.1	LINC02538	AC004066.2	RAD51AP1	RBP2	TCF24	HIST2H3D	TMPRSS11E	CHGB	STEAP1	CCK	AC021915.2	AL033380.1	AC007682.1	AC021915.2	AC010307.4	AC011754.1	LRRC26
92	RARRES1	ECM1	DNTT	WNT5A-AS1	PCDH11Y	AC012325.1	DANT1	AC092611.1	HIST1H3D	ENTPD1	SPHK1	RAD54L	LINC00609	SLCO4A1	SNX31	CD22	RASGRF2	IGSF1	AC124798.3	AC002057.1	AC005696.4	PRR16	LBX2
93	ANGPTL7	CAV1	GC	HOXA9	HTR7	LINC02745	LRTM1	AC022601.1	PRODH	ATP2C2	CTSH	COL9A1	AC005381.1	LMX1B	SLC17A7	ACTL6B	FRMPD3-AS1	AC092939.1	NRSN1	AL157932.1	AC095350.1	TBL1Y	LINC01949
94	KLK13	REM1	TMEM158	MAB21L1	AL353595.1	AC144521.1	OR7D2	AL355537.1	TCF15	HES7	AFM	FOXM1	AC105053.1	NKPD1	NPTX1	UPB1	AC069155.1	RASGRF1	TNP1	MIR137HG	LINC01602	CCDC3	AC096772.1
95	CHST4	TM4SF5	TMEM136	AL136090.2	FHL5	LINC01797	LINC01947	CPNE4	INCENP	CCKAR	VWC2	KIF4A	AC012485.2	IGSF21	TRPC7	RAB37	CORIN	PEX5L-AS2	AF279873.4	AC007557.3	DDN	LINC01102	C8orf49
96	SUSD2	UPK1B	RIMS4	AC009139.1	NEGR1	LINC01956	KCNJ3	GP2	CDCA8	LRRC39	RAB20	HIST1H1A	ANKRD18A	NECAB2	GNG8	SCG3	SSTR3	TMIGD3	NPAS4	AC021915.1	CFC1	AC016252.1	AP001652.1
97	AC130456.2	TMEM26	COL8A1	AC007317.2	INKA1	LINC01982	LINC01099	MT1G	AMY1A	TMED6	ADH1A	ERCC6L	FUT6	TCP11	HLA-DQA2	SMIM35	FAM155B	AC087457.1	SYT4	AC021683.3	AC007495.1	AL390964.1	AC008539.1
98	C2	TPBGL	LSP1	AC097716.1	KIF26B	LHFPL3-AS2	AL391361.2	REG3G	HIST1H4A	ZNF750	PCP4L1	CCNE2	LINC01435	LRRC10B	AC013562.1	RIIAD1	KLRC3	IAPP	DRD2	AC011373.1	AC124798.3	AC022034.3	PTPRT
99	TMEM255A	C2orf40	BVES	LINC01096	CARD18	AC000068.3	LINC00930	AP002001.3	CCNA2	CBS	ALB	ARHGEF39	LINC02406	OLFM1	DRD2	ADORA2A	AL158038.1	MYT1L	LINC01202	AL592164.1	AC022893.2	AL078590.2	AL138701.2
100	UPK1B	FNDC1	MTSS1L	ZNF804A	AL157396.1	AC108037.1	AC120498.9	CATSPERB	EXO1	DERL3	MPEG1	RACGAP1	AL138900.1	TMEM114	TUBB3	SLC14A2	ERICH3	USP41	AC096589.1	AC005324.1	AC084114.1	SCN7A	CNR1
101	COL8A1	GABRQ	BEGAIN	AC016924.1	TPTE	ERC2-IT1	AC011446.3	AC022509.2	NUPR1	CD38	AGT	MKI67	SLC41A2	STEAP1	RASAL3	RUNDC3A	ACTL6B	PRLHR	BX005019.1	AC007922.4	LINC02414	NEB	AC113386.1
102	NXPH3	MYH8	P2RX2	FAM242C	AL133395.1	AC107027.1	TEMN3-AS1	AC098617.1	EME1	LRMP	SLC25A45	MCM10	BDKRB2	TRIM9	OLFM1	CELF3	DRC1	NPAS4	AC022893.2	AL356413.1	BAALC-AS2	AL356022.1	DDIT4-AS1
103	CLDN15	CASP12	SLC2A4	AC012574.2	HBG2	AC090826.1	DDIT4-AS1	AC087857.1	GFI1	AMIGO3	RASSF9	SLC22A2	GAS6-AS1	CRYBB1	AQP7	CLDN11	KCNJ6	AC004147.2	LINC02440	AC093390.2	PHGR1	HBZ	AC090340.1
104	AC093866.1	TMEM151A	MFAP4	AC013470.2	C17orf82	CUX2	AC076968.2	AC124254.2	CCNE2	S100A8	KYNU	HIST1H2AJ	CALHM3	MRGPRE	PDCD1	SLC6A20	GRIA2	AC012150.1	AC126696.1	AL138916.1	PLPPR5	ASCL1	IGFL4
105	AC103409.1	BNC1	NKX2-5	ZDHHC19	KCNN2	LEMD1	ANGPT2	LINC01517	TRAIP	RET	LTK	HJURP	AC092118.1	SULT2B1	CABP7	G6PC2	MAPK8IP2	AL031658.2	AC013562.1	LINC02536	LINC01484	LINC00327	SAMD11
106	ITGB3	NRK	THEM7P	AC010476.2	AC008250.1	AC090282.1	AC073641.1	CIB4	TSGA10IP	ERP27	LURAP1L	XKR5	AC007193.2	PRODH2	CACNA2D1	PYY	KCNMB2-AS1	CLEC1B	AL138694.1	AC239585.2	AC113391.2	MDGA2	AC104803.1
107	FMOD	CHIA	DPEP2	HOXD3	COL15A1	TCP10L	AC092640.1	AC104794.5	CENPL	MAB21L3	BTBD16	TMEM100	KIAA0319	PI16	ZBP1	CFAP77	SPHKAP	C22orf42	AC006043.1	AC005609.1	AC126696.3	SPATA16	PIGZ
108	ESR1	GPR88	TBX2	ADCYAP1	LINC02751	LINC01812	AC020917.2	REG4	DSCC1	ADAP2	CA2	CENPE	TLL1	GDAP1L1	AC016717.2	AP3B2	HRASLS	PCSK2	TRPA1	OR1D2	EEF1A2	AL359987.1	AC243829.1
109	ECEL1	NID2	SAG	AC002472.1	AC008568.1	AC004908.1	AC010491.2	LINC01182	REG1A	RGS1	MRAP	HIST1H2AD	AC107980.1	ABCC12	IGSF21	NECAB2	NYAP2	SCG3	AC092070.4	LINC00701	LINC01315	AC012615.2	AC068931.1
110	LINC01133	CLEC2L	COX4I2	BNC2-AS1	ANOS1	ALKAL1	AC109466.1	TMEM211	BOK	PADI1	HPGD	TPX2	AC007277.1	PLA2G2D	VWA5B2	TRIM67	WNT4	AC066612.1	CNGA3	AC022469.2	HLA-DQA2	AC105450.1	VENTX
111	CFB	PCDH19	RXRG	LINC01475	AC093765.2	AC005519.1	MIR31HG	SV2B	C10orf71	SPDEF	URAHP	PKMYT1	SHANK2-AS3	EFCC1	BAALC-AS2	PTPRN	NAP1L5	AL589765.1	AC007749.2	OPN5	TAGLN3	CISTR	GLYATL1
112	ALDH1A2	SLC1A6	KCNJ8	SLC24A3	COL6A3	LBX2	AC106772.1	AC004982.2	GC	CABP1	UGT2B10	NEK2	MIRLET7BHG	SNCB	GAD2	NAP1L5	DISP2	Z82196.2	C2orf70	AC108861.1	AC084335.1	AP000462.2	AL139231.1
113	ABI3BP	KRT5	OAF	HOXC6	CACNG8	U73169.1	LINC01198	AC090946.1	CD53	CTRB1	TAP2	CITED1	LTBP2	PIM2	RBM24	TMIGD3	ETV1	JAKMIP1	GAD2	FGF12-AS2	PRR29-AS1	TIE1	FOXH1
114	XAF1	C16orf45	UTP14C	AC092162.2	KIF26B-AS1	LINC01781	LINC00324	AC091885.2	TBC1D21	MYADML2	MME	ANLN	AC022144.1	TP53COR1	SRRM4	C9orf24	GPR179	ASB9	RHOA-IT1	AC105150.1	AC024610.2	AC008945.2	KCNJ3
115	C1QL2	RASGRP2	HOXA2	AC005323.2	CNTNAP2	GRM3	AC011446.1	NRCAM	ABCB4	LGALS9	S100A14	IFIT2	KRT4	VDR	CRYBA4	BAIAP3	CHGA	SLC6A20	AC069404.1	AC020651.1	AC008752.2	AC016716.2	CYP2C9
116	PLXNA4	KIF20A	AKAP2	AF106564.1	C11orf96	LINC01967	NETO1	IL15	SHCBP1	CEL	IKZF3	HMMR	SCD5	CELF3	AC006145.1	SYT13	PCSK2	AC087855.2	CSF3	AC010181.1	SPEGNB	AL139231.1	FAM162B
117	OSR1	ASPHD2	SHD	CNTNAP4	PTGIR	GSTA2	AKR1D1	AL355916.1	SHMT1	PGLYRP1	ACOT1	UBE2T	AL645608.7	CLDN11	CBFA2T3	GNAO1	SLC30A8	SVOP	AC009234.1	AL110505.1	AL356489.3	AC013287.1	KCNV1
118	GPM6A	EDN2	SYNPO	HOXD-AS2	C1QL4	AC010092.1	AC016727.3	LINC01619	NCAPH	GABRA4	TMEM178A	NUF2	AC091588.2	MIAT	MGAT5B	RIT2	GPRIN1	AC073626.1	AC008050.1	AC006364.1	CRYBA2	AL139142.1	GSTA1
119	KLK8	GBP2	VSTM4	AC092114.1	DIO3OS	AC019211.1	AGTR1	AC010157.1	PIRT	DHX34	TF	RRM2	AP002989.1	NEUROD1	NYAP2	CIDEA	PRSS50	LINC01014	SLC22A16	AC010494.1	AC244035.1	AC246817.2	LGALS3
120	SERPINB10	HIST2H4A	PLA1A	AL136962.1	AC011586.2	AL163952.1	AC078883.2	EML6	CCNE1	COL20A1	C16orf89	TACC3	NRIR	SHOX2	GADD45A	GNG3	LINC01202	SLIT1	RTP4	CCL13	INA	AC100803.4	FGF23
121	ESAM	XKR5	LECT2	AC113349.1	AL365214.2	AL355073.2	AC011997.2	TACR1	VPREB1	SOSTDC1	CTSE	HAS3	CXCL1	CCER2	GDAP1L1	FAM57B	SULT1D1P	ATP2A3	LINC02470	AC113423.2	AC007731.5	AC068759.1	GRM3
122	HECW2-AS1	FAM107A	NDNF	LINC02033	DIPK2B	AC092546.1	HOMER3-AS1	AC109630.1	MLIP	TNFSF10	MISP	CDCA3	TCIM	ABHD15	DLL3	TTC16	CDK5R2	AC006019.1	TUBB1	LINC00837	TUBB1	SLC17A3	BMPR1B-DT
123	TRH	CNTFR	EMILIN1	MUC12	LINC01684	FIRRE	LINC02059	APOC2	HIST1H2BB	PIRT	MB	HIST2H2AA3	AC131953.2	CD3G	SLC35D3	CELF6	NAP1L2	AGXT2	LINC01679	AC141930.1	LINC01637	LINC01896	NKX6-2
124	OGN	FMOD	HBE1	SLC6A15	PCDH9-AS2	DDIT4-AS1	MROH8	AL049775.2	CCNF	PNLIPRP1	AGMO	KIF15	LCN12	RPRML	C2CD4C	AMIGO2	USH2A	AC007731.5	KCNB2	FRMPD4	AC006369.1	LINC01166	AQP10
125	A4GALT	HOXA6	KYNU	AC105254.1	LINC02008	LHFPL3-AS1	TERC	AC104781.2	MATN4	ALAS2	STARD8	VNN1	AC135893.1	SRRM4	MYT1	NEUROD1	GNAO1	CDK5R2	AC096576.3	AL032819.3	AC090679.2	AC026367.3	APOBEC3H
126	GJB3	ADTRP	CA14	AC098798.1	AC073174.1	AC016716.2	AL450344.3	LRRK2	UBE2C	MYO15B	CAPG	MYBL2	AC022613.1	CD40	DLL4	CNIH2	LY6K	AC137932.2	AC007731.5	LINC02560	LINC00921	SULT1E1	SPTLC3
127	ILDR2	KRTDAP	HTRA3	ISL2	AL033530.1	LRATD1	AC092691.3	AC112236.3	DDC	MAT1A	P4HA3	FMO2	B3GALT5	AK8	GCNT3	CAMK2N2	KCNK3	PEX5L	SCN3A	B3GNT6	NXF2B	AF131216.4	TMEM92
128	CFH	PMP22	RRAD	MIR1-1HG	CETP	GATA4	AL589669.1	MEG8	DRAM1	S100A9	IRAK2	HIST1H2AG	AL133268.4	GFRA3	GPX2	HPD	TOGARAM2	LINC01484	AC009102.4	KRT2	FBLL1	GLP2R	SULT1E1
129	SULF1	ANKLE1	GULOP	AC008568.1	HAS2	DIO3	AC008415.1	AL136985.3	CDC6	SLC17A9	HHEX	CENPH	CCDC9B	GTF2A1L	RSAD2	PPP1R1A	UBE2U	MLXIPL	AC069437.1	AC009558.1	ASB9	TMPRSS5	CSF3R
130	CXCL13	SHISA4	ART1	LIX1	AC025280.3	LINC01483	AL021395.1	AC068481.1	SYNGR4	CD52	MCMDC2	DLGAP5	ATP10B	BCO1	KCNB2	SNCB	KCNMB2	PTPRN	SHISAL2B	PHGR1	PSCA	AL352984.1	LINC01889
131	C11orf87	GAS1	RHEBL1	LINC02737	AC009951.6	AP000345.2	AP003717.4	AP006248.4	SPC24	C10orf71	HABP2	FMO1	AL645944.2	ASB4	COL13A1	GPA33	APOBEC4	AC115837.2	MGAM2	AL445363.2	LINC01586	PLA2R1	MS4A4E
132	IL33	AMPH	KIF21B	STAC	AC110760.1	AC010729.2	AC104063.1	AL137847.1	CDC45	NCF4	FAM166B	C17orf53	LINC00866	PLA2G2F	SLC25A34	DRC1	CAMK2B	MRLN	LINC00336	AL031289.2	KCNK17	GAU1	FAM163A
133	ECM1	S100A4	COL23A1	TDRD15	LINC00871	SGIP1	ZNF728	AC069366.2	CELA1	PSMB10	SHROOM1	OIP5	AC093523.1	VSIG8	ADGRA1	CD164L2	FFAR1	HS3ST6	SLC7A11-AS1	AC018521.7	PPY	LINC02307	AL135923.2
134	ARHGEF25	HIST1H2AB	HOXB6	COL23A1	AC073091.3	AL359851.1	LINC02160	STARD13-AS	HMMR	CD53	RXRG	FAM89A	NRXN3	SRL	DPYSL4	MAFB	LINC01370	SSTR3	ARG1	AP001407.1	TLCD3B	HELLPAR	AC108169.1
135	CYGB	LOX	FAP	AC244153.1	CCDC26	AL390964.1	LHX5	AL022323.4	UBE2T	PTPRC	CBLC	PLK4	AP006621.4	GSG1L	PLA2G2D	SLC38A8	SVOP	TPH2	AC069155.1	AL157937.1	TMEM233	AC245187.2	LINC00670
136	PSTPIP1	ANXA8	DUSP9	GRM8	AC106895.2	AC066614.1	LHFPL3-AS2	EPAS1	CCKAR	NUPR1	EHF	ALOX12	AC091138.1	OSR2	MGAM2	TMIE	AP001407.1	CDH22	AL359382.2	AC096675.1	CNGA3	MYCT1	AC025366.1
137	RPP25	CEP55	STX1B	DACT3-AS1	LINC02364	LNCOC1	NLGN4X	AC011997.2	TGFBR3L	FOLR2	TMEM116	SLC25A48	FAM189A1	SNX20	ACTN3	FFAR4	PDK4	GRM4	KCNC2	LINC01643	CROCC2	HYAL4	SMR3B
138	ADAM33	FGF18	HOXB8	AC006058.1	HGF	SHISA9	DKK2	MECOM	RFC4	SEC16B	PALMD	KIFC1	AL596223.1	MBOAT4	SCUBE1	LRRC73	AP3B2	SYP	CACNG2	AC079015.1	TNP1	AC068756.1	ANXA13
139	CAVIN2	TGM5	IFITM1	AP001092.1	EMCN	RGSL1	LMO3	SCHLAP1	NCAPG	EPB41L4B	ITGB6	SAPCD2	LINC01915	GPR119	CELF3	RAB3A	AC087855.2	KCNU1	PPFIA2-AS1	AC011995.2	AC010641.2	COL25A1	AC074237.1
140	SMYD1	IL33	SNX20	AC009063.2	GLP2R	C8orf34-AS1	OSTM1-AS1	CAMK1D	FAM129A	HCK	RAB19	KIF20B	LIN7A	2024-09-03	SH2D5	GDAP1L1	RUNDC3A	AL024495.1	FAM167A-AS1	CNGA3	TRPC7-AS1	LINC02302	SLC44A5
141	BARX1	ANKRD29	SHOX2	LINC01914	ADAMTS14	HOMER3-AS1	AL355482.1	AC002480.2	HIST1H1A	MLPH	FADS6	IKZF3	AC010207.1	CHRNB2	PHGR1	MEOX1	AC084114.1	AC105402.4	LINC02653	LINC01792	AIF1	AC012588.1	AC080129.2
142	WT1	COL6A5	SNAI1	PGM5-AS1	CYSLTR2	WDR87	TUSC7	NIBAN1	SLC38A3	CMA1	RAPSN	BUB1B	EDAR	FITM1	BHMT2	PPP1R27	LINC00616	SLC2A6	GABRB3	AC092800.1	AC016717.2	USP9Y	AL450992.3
143	NXNL2	C3orf80	TBXA2R	SERPINB11	AC044781.1	AC107464.1	LINC02143	LINC01673	HIST1H2BL	F13A1	KIAA1755	FAM72A	AL079338.1	GRASP	BAALC	PCSK1	IQCA1L	MEIG1	MSTN	TTC24	ZDHHC22	AC012557.2	AC012123.1
144	ODF3B	GJB5	KRT20	CNTN6	AGBL1	PFKFB4	SLC22A3	AC016735.1	ARHGEF39	PLET1	FSTL3	WFDC9	AL356356.1	GIMD1	SRL	LHX1	ABCC8	KL	TMEM63C	AC011899.2	AL606807.1	PHOX2B	ADARB2-AS1
145	ANGPT4	HPSE	PCDHB8	CDH13	CNTN5	CACNA1C-AS2	AC010163.1	AC061708.1	DDIAS	SLC41A1	LRRC8E	TROAP	Z82214.2	TUBB3	TGM5	GCH1	AC087457.1	TMEM63C	AL356489.2	AL121757.1	Z82196.2	AL160408.2	NCKAP5-AS1
146	C3	AUNIP	POPDC3	HAGLROS	GRM7-AS1	FAM71F1	AC099535.2	ELMO1	CYCTP	PNLIP	EGFLAM	FIGNL1	MUC20	CD164L2	NEUROD1	HYPM	SPATA45	PAPSS2	AL590440.1	AL035420.2	SPRN	ALB	LINC00290
147	XPNPEP2	ST8SIA1	RCSD1	MARCH1	FAM241A	ANO2	HIST3H2BB	NOMO2	SERPINI1	PC	UGT8	HIST1H3F	LINC02198	AKAP17BP	AJAP1	CBLN4	SCG2	INA	AC087457.1	AC005544.1	TRBV26OR9-2	AC022034.1	PPARG
148	MMP17	HOXB4	VCAM1	AL023553.1	HAS2-AS1	AP001636.3	TTC6	CDH10	CCDC116	TPSB2	NGEF	KIF22	SLC4A4	C16orf54	ELAVL4	PRNP	SLC6A20	MAPT	KCNJ6	AC009102.2	A1BG-AS1	AC004556.3	IL20RA
149	VIT	ADGRF5	KIAA1755	CNTN5	CCDC194	LINC02200	AC004470.1	NPHS1	TRIP13	SLC17A7	SPP2	HIST1H1E	AL031666.1	USH1G	LINC02197	ABCC8	FAM166A	LINC01885	AC080132.1	AL357093.1	TUNAR	LINC00377	AC019117.2
150	HSPB2	FAM180A	HOXA5	TYRP1	AL445465.1	LINC00334	LINC00607	AC072022.1	CKAP2L	CLPS	EPS8L1	GTSE1	KAAG1	FAM57B	BCO1	DLL3	HPGDS	CALB2	RD3	LINC02437	AQP10	AP005203.1	UCA1
151	CMAHP	FLNC	C14orf180	HOXB-AS3	AC111006.1	AC109347.2	TEX11	MSC-AS1	PNLIPRP1	AMY2B	MYCN	HIST2H2AB	AC116609.3	VGF	SCIN	TMEM179	KL	MAFB	AC055872.2	REV3L-IT1	AC023300.2	ARHGAP15	WEE2
152	SOHLH1	FST	OPRK1	LINC00620	CGB7	AC034111.2	PRR7-AS1	AC136475.3	CDCA2	RAB3D	KCNK5	RAD54B	LINC01310	SLC24A2	CD79A	MLXIPL	PNOC	SLC5A1	TMEM132D	AC009654.1	MMRN1	AC244213.1	SERPINB13
153	KCNJ8	EMP3	2024-09-11	PSAPL1	AC105383.1	AC069277.1	LINC02689	AC132153.1	SLAMF1	HCAR1	LCN2	FAM72C	STOML3	PADI3	AC010247.2	MICALCL	NFASC	AC100832.2	LINC02197	LINC02470	AC092675.1	LINC02714	SCN7A
154	CHD5	SHISA3	TSSK4	GPR101	PCDH9	AC015967.1	AC133919.1	ASCL5	TCF19	ACTRT3	SLC22A18	LIG1	AC018680.1	KCNK12	AL356489.2	TEKT2	SERPIND1	GPR158	KLHL1	AL450384.1	PNMA8C	AC008591.1	TBX3
155	FAIM2	FAM124A	SPP2	ADAMTS18	IQCM	ADAMTS19	AC004221.1	AC084375.1	SPC25	SLC16A6	ILDR1	E2F7	AC099552.5	MYT1	RFX6	CHST8	TUBB1	MAOB	DSCAM	AC007540.1	AL161908.1	ADAMTS19-AS1	AL831784.1
156	HOXB8	HAND2	FAM84A	AC096667.1	AC092100.1	ITPRID1	AC096637.2	AL357141.1	SKA3	HCLS1	SMTNL2	TCF24	AC091563.1	KL	TMEM114	VWA5B2	ATCAY	CBLN1	FGF14	SMIM2	ANKRD33	AC016044.1	NHS-AS1
157	AC012653.2	EME1	CPA6	LINC02720	AP002762.2	AC105094.2	PLCL1	AC090945.1	COX7A1	ITGB7	C6orf58	KIF18B	CCN2	SAPCD1	FUT1	CD3G	CELSR3	KRT27	LINC01445	AC003077.1	LINC01202	AC073172.1	KCNH5
158	LOR	GPM6A	NFATC4	PCDH7	TARID	F2	AC092691.1	ZNF536	TEX30	CCDC116	UGT2B7	TRIP13	AC008456.1	GADD45A	TTYH2	FA2H	PLPPR5	TRPM2	KL	AC244093.3	AL356489.2	OR2C3	MYOCD
159	GPR50	S100A6	ANKLE1	AC095056.1	TEX41	B3GAT2	AC009236.1	AC091576.1	CORO1A	SLC38A3	ABCA8	CCNB1	AL390755.1	TSLP	GABBR2	GNAZ	PAX6	PPM1E	KCNE2	AC017099.2	A1BG	CXCL3	AL354771.1
160	CXCL16	CSF1	AMER2	AC083795.2	LINC02497	OR3A2	AL049647.1	AC123784.1	NDC80	ASNS	HMGCS2	MAD2L1	AP003717.1	HS3ST6	FITM1	SPHKAP	AF279873.4	MEOX1	LINC01886	AL845472.1	AC004832.1	SALL3	LIM2
161	IL18	HOXB5	DBIL5P	CT55	THY1	NLGN4X	ODAPH	OR9Q1	TOP2A	CTSS	MLPH	HIST1H3D	SEMA5B	SYT13	RAB15	AKAP17BP	SPTBN4	AC013562.1	MUC19	AC093583.1	AC113391.1	SYNPO2	TRPC4
162	ELN	CALCR	DCT	AC046195.1	AL590783.1	APOB	AL139819.1	NPSR1	PLK4	BANF2	OTOP3	AIRE	AL158840.1	NKX2-2	GRM4	ABHD15	AC009102.4	SLC18A1	SVOP	LINC00354	ADGRA1-AS1	LINC02770	ADARB2
163	CADM3	ARSI	FGF8	CTXND2	RYR2	ZBTB16	SP8	RTL1	SLC25A48	TYROBP	NCMAP	BIRC5	KRT17	TNNC1	GRASP	USH1C	TMEM130	UBE2U	XKR7	AL022397.1	GAD2	CARMN	EPS8L3
164	EDN2	MARCH11	SHISA2	LCN1	AL356295.1	STXBP5-AS1	LHFPL3-AS1	AL022323.3	FAM72A	ASB16	CITED1	CYCTP	AC110023.1	MAS1	CHRNB4	CIB3	GPC5-AS1	TMEM178B	TMEM154	AC069234.3	QPCT	AC011586.2	AC096747.1
165	SECTM1	SLITRK4	ZNF575	SIX2	GBP1	CTNNA2	ETV3L	NPSR1-AS1	BIRC5	PTPN22	ELMO3	HIST1H3I	AC011317.1	ADCYAP1R1	DRAXIN	ANKH	TMEM178B	ST8SIA5	AL513164.1	AC023158.1	SSTR5-AS1	LGR5	AC098798.1
166	NRGN	CRYAB	KCNA5	NDNF	LINC01163	HM13-AS1	EDIL3	C12orf74	FAM83D	SPEF1	FBXO27	DHFR	AC008554.1	PTHLH	PRODH2	ADGB	AL591501.1	KCNB2	AC012213.1	AC005293.1	INSYN1-AS1	CALN1	LINC01049
167	C1QTNF2	ZFP57	IGFBP4	AL512662.2	ITGA8	ONECUT3	LINC02487	LINC00051	MTHFD2	LGI2	TESC	FMO4	AL138927.1	S100Z	NKX2-2	PPP2R5B	AC011824.2	ADCYAP1	MIR7-3HG	AL161851.1	MYH1	CALCRL	CASC18
168	NKAIN4	RCSD1	RAB3IL1	AC007743.1	AC010230.1	RGS7	AC243829.1	AL163953.1	HIST1H2BM	PM20D1	MBOAT1	PSRC1	AL365436.2	ZFP92	CUTALP	SCG5	TMEM63C	PLPPR5	AC006145.1	CT62	SHISAL2B	DPYD	AGR3
169	IL31RA	TNFRSF11B	GAS1	AC022433.1	LINC02377	LINC00901	AC007163.1	TFR2	DHX34	TTC23	TJP3	BLM	SFRP4	GUCA2B	MYCL	SCGN	HLA-DQA2	PAX6	AP001407.1	AL137220.1	AL672310.1	AC010157.2	CLRN3
170	KCNA5	RND1	PABPC4L	TECRL	RGS7BP	AL020997.4	AC008026.3	AL022323.1	MYL10	CCL3	CRP	CIT	AL121929.3	FBXL16	ELAVL3	ST8SIA3	CACNA1A	CRHR1	RIMS2	SGCZ	PCSK1N	NPIPB7	GALNTL6
171	PHF24	IRF5	RNF165	AC010230.1	FGD5	AC011754.1	AL445123.2	AL138999.2	TMEM238	IL7R	DOK7	ABCA8	AC012050.1	BAIAP3	TNNC1	IGFBPL1	CLDN11	DERL3	AC090993.1	EPHA5-AS1	TTR	GRTP1-AS1	CACNG6
172	PLA2G4D	BMP4	ZBTB12	AC015818.2	AP003066.1	ESRRG	AP000844.2	AC011365.1	IFRD2	LAPTM5	AGER	PIF1	AC024560.1	SYT7	CLDN11	PNOC	FAM92B	TMOD1	ASPDH	AC012513.1	LINC01664	GIMAP4	CRYBG1
173	AOC3	PDPN	2024-09-09	AL591378.1	CCN4	PTPN5	AC098617.1	CHRM3	TK1	MRO	ADAMTS1	HAUS8	SHANK2-AS1	CBFA2T3	TP53I11	PLCXD3	DMRTC1	C4orf54	SPEGNB	AC016549.1	AC055811.3	EIF1AY	KHDRBS2
174	KLK10	NSG1	FUK	RGS5	AC097518.2	AC073571.1	LINC01812	AOAH	MYC	KLF15	NR1H4	CENPK	LATS2-AS1	ZCCHC18	SYT13	DNAJA4	ST18	AC022893.2	AL391645.1	AC105402.4	MCHR1	AC131944.1	CD300A
175	RBFOX1	JSRP1	BGN	TMEM132D	LINC02232	SLCO5A1	AC079210.1	AC104035.1	ALOX5	COPZ2	IGSF5	CENPI	AC089985.1	ACTN3	TMIE	MYT1	RSPH10B	SPOCK2	TRBV26OR9-2	AL035252.2	AC116407.2	C17orf78	IL1RAP
176	ZFP57	HR	SCARF2	AC103702.1	COL3A1	KISS1	OPCML	AC007100.1	MELK	CD48	GDNF	DDIT4L	AC010329.1	PGC	TP53COR1	SLC12A1	CERKL	GAD1	AC005414.1	AL355310.2	RHBDL1	ROCR	SHISAL2A
177	EHD2	WNT6	ICAM4	AC073174.1	AC093655.1	AC067956.1	AL390866.1	ABCC6	AWAT2	CCL4	LAMC2	MAGEE2	AC079466.2	PAX6	COL11A2	CACNA2D4	AL080273.1	AC005696.4	CROCC2	TRPC7-AS1	GPBAR1	TMSB4Y	THRB-AS1
178	NGB	KRT15	S100A3	PSG9	SIAH3	JAML	AC114947.2	AL358944.1	MAB21L3	FAM221B	MUC1	HAUS5	SYCP2	TMIE	USH1G	EFCAB1	UPB1	DPPA5	AP003559.1	NCAM1-AS1	LAIR2	AL442636.1	AC097487.1
179	PYGM	HOXB2	AIRN	SVEP1	LINC02664	TAS2R31	AC113383.1	AL139243.1	CTSE	SLA	MIA	GSTA3	AL392023.2	DNER	CASZ1	SDCBP2	PYY	CDKN2B	GLRA3	AL159972.1	SLC4A10	LINC02119	AC026765.3
180	FXYD7	COLEC12	SERTAD4	AC106872.12	PTX3	CDH10	RGS6	ADAMTS17	LGI2	KIAA1324	NEU2	HIST1H4D	LINC02691	OTOP3	TAL2	SESN2	AF279873.3	MYH7	LINC01885	AC005786.2	AC140481.1	HTR1E	ANKRD30A
181	PMP22	GLIPR2	RDH10	AC027031.2	COL24A1	AP005436.2	AC006378.1	AC011389.2	KBTBD8	EGF	VILL	CHAF1B	CCDC170	CRHR2	PTENP1-AS	CPLX2	AC006043.1	AC021915.2	GPR183	AC004147.3	GABRG2	GABRG3-AS1	LINC02562
182	HOXB7	PTGER1	PRODH	HOXC8	AC005906.2	AC012668.3	NPY5R	AC005329.1	RAD54L	KIAA1147	EAF2	CDC6	DNAH11	PLK5	SSTR5-AS1	MARCH11	PTPRN	C20orf197	AL121672.2	AC005197.1	ZG16B	LEMD1	SOX21-AS1
183	RNF112	LGI3	DUSP7	PLPP4	CARMN	AC104964.3	AC069277.1	MAGI1-IT1	HIST1H3C	HS3ST3B1	ERICH5	GINS3	TNFAIP2	PLCXD3	NUMBL	HPGDS	CCDC190	DISP2	AC096759.1	AC020892.1	ULBP2	AL355297.4	CLIC5
184	FBLN2	EHD2	P3H3	SGCG	KCNE4	ORM1	AC005005.3	AC013652.1	ERCC6L	SRGN	SAMD9L	ATP1A2	AC016405.3	C8B	FEV	SYT7	ABHD15	GPD1	MTUS2-AS1	AC121757.2	AC005523.1	AC008522.1	AC021733.4
185	MGP	ITGB3	CEBPA	NELL2	LINC00710	CNTN3	AC022167.3	CPA2	GABRA4	GYPA	FAM234B	MIS18A	CFAP46	FGD2	RCOR2	APOM	FAM183A	ACTL6B	GAP43	AP001059.2	ADGRA1	AL359644.1	AL158151.3
186	CD248	HAL	ARHGAP31	MTUS2-AS2	ZNF469	LINC02074	AC011313.1	LINC01612	HOMER2	REEP5	PADI4	UGT8	LINC00592	UNC13A	KCNMB1	SPINK13	AC006019.3	FAM92B	TTC39A-AS1	AL158832.2	KCNH6	TMEM200C	AC114316.1
187	ABCG4	CHST1	EPHA3	BMPER	CD4	NAMA	AL353804.1	AC016152.1	HES7	MT1A	ME1	CDC25C	PITPNM3	GIP	TCP11	BCL6B	SCN3A	SLC7A14	MMP9	AL592043.1	LINC01471	HCP5	PANCR
188	WT1-AS	PCDH10	SHISA8	SERTM2	PCAT19	HSD11B2	CLEC4D	LRMDA	CFAP100	SOAT2	CA8	SHISA9	CFAP206	GUCA2A	RSPO4	PNMA8A	MYT1L	AC084114.1	LINC01435	ACSL1	PF4V1	LINC01060	AC007563.4
[truncated: 9,150 more rows]

## Sheet: Supplementary Table 7
Supplementary Table 7. Day 13 10x single-cell RNA-seq clustering. Cell cluster markers (adjusted P-value<0.05) ranked by average log2 fold change.
[truncated: 1,056 more rows]
